# Supplementary material for: Synthesis and X-ray characterization of novel palladium(ii) complexes with tunable chiral anionic counterions
Source: Royal Society of Chemistry journal article supplement (doi:10.1039/c3dt00007a), 2013-01-01
Supplement: c3dt00007a.pdf [file c3dt00007a.pdf]

## Synthesis and X-ray characterization of novel palladium(II) complexes with tunable chiral anionic counterions

Yudong Cai<sup>a</sup> and Yian Shi<sup>\*a,b</sup>

<sup>a</sup> *Beijing National Laboratory for Molecular Sciences, CAS Key Laboratory of  
Molecular Recognition and Function, Institute of Chemistry, Chinese Academy  
of Sciences, Beijing 100190, China.*

<sup>b</sup> *Department of chemistry, Colorado State University, Fort Collins,  
Colorado 80523, USA*

### Supporting Information

#### Table of Contents

|                                                   |       |
|---------------------------------------------------|-------|
| General methods                                   | S-2   |
| Experimental procedures and characterization data | S-2   |
| X-ray structures                                  | S-12  |
| NMR spectra                                       | S-155 |

**General Methods.** All commercially available reagents were used without further purification. All dry solvents were freshly distilled under nitrogen from appropriate drying agents before use. Toluene, tetrahydrofuran, and ethyl ether were distilled from sodium-benzophenone. Dichloromethane was distilled from CaH<sub>2</sub>. Column chromatography was performed on silica gel (200-300 mesh). <sup>1</sup>H NMR spectra were recorded on a 400 MHz NMR spectrometer and <sup>13</sup>C NMR spectra were recorded on a 100 MHz NMR spectrometer. IR spectra were recorded on a FT-IR spectrometer. Melting points were uncorrected. The dialkylpalladium(II) agents were prepared according to published procedures [for Pd(CH<sub>2</sub>SiMe<sub>3</sub>)<sub>2</sub>(dppe), see: ref. 1; for Pd(CH<sub>2</sub>SiMe<sub>3</sub>)<sub>2</sub>(cod), see: ref. 2; for PdMe<sub>2</sub>(TMEDA) and *cis*-PdMe<sub>2</sub>(PPh<sub>3</sub>)<sub>2</sub>, see: ref. 3]. The chiral acids were prepared according to published procedures [for **1**, see: ref. 4; for **2a**, see: ref. 5; for **3b**, see: ref. 6; for **4b**, see: ref. 7]. Other starting materials were purchased from commercial suppliers.

Ref :

- (1) R. A. Stockland, G. K. Anderson and N. P. Rath, *Organometallics*, 1997, **16**, 5096.
- (2) Y. Pan and G. B. Young, *J. Organomet. Chem.*, 1999, **577**, 257.
- (3) W. D. Graaf, J. Boersma, W. J. J. Smeets, A. L. Spek and G. V. Koten, *Organometallics*, 1989, **8**, 2907.
- (4) K. Mikami, H. Kakuno and K. Aikawa, *Angew. Chem., Int. Ed.*, 2005, **44**, 7257.
- (5) T. Ohta, M. Ito, K. Inagaki and H. Takaya, *Tetrahedron Lett.*, 1993, **34**, 1615.
- (6) A. Korostylev, V. I. Tararov, C. Fischer, A. Monsees and A. Börner, *J. Org. Chem.*, 2004, **69**, 3220.
- (7) D. Sälinger and R. Brückner, *Chem.-Eur. J.*, 2009, **15**, 6688.

### Preparation of Pd(CH<sub>2</sub>SiMe<sub>3</sub>)<sub>2</sub>(dppb)

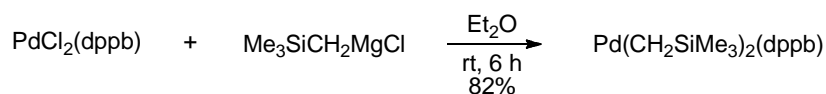

To a suspension of PdCl<sub>2</sub>(dppb) (0.604 g, 1.0 mmol) in Et<sub>2</sub>O (30 mL) in a two-necked



under vacuum to give complex **5** as orange solid (0.058 g, 91%) (the crystal for the X-ray structure was obtained from a CH<sub>2</sub>Cl<sub>2</sub>/Hexane solvent at rt). mp. 205-209 °C;  $[\alpha]_D^{20} = +98.1$  (*c* 1.06, CHCl<sub>3</sub>); IR (film) 3056, 1437, 1328, 1170 cm<sup>-1</sup>; <sup>1</sup>H NMR (400 MHz, CDCl<sub>3</sub>) δ 8.17-8.07 (m, 4H), 7.79 (d, *J* = 8.0 Hz, 2H), 7.72 (d, *J* = 8.4 Hz, 2H), 7.68-7.61 (m, 2H), 7.60-7.48 (m, 10H), 7.46-7.38 (m, 4H), 7.37-7.29 (m, 2H), 7.11-7.03 (m, 4H), 6.95 (d, *J* = 8.4 Hz, 2H), 2.51-2.28 (m, 4H); <sup>13</sup>C NMR (100 MHz, CDCl<sub>3</sub>) δ 139.1, 135.0, 134.4, 134.3, 133.9, 133.8, 132.8, 132.4, 132.3, 130.4, 129.8, 129.7, 129.6, 129.2, 129.0, 128.8, 128.7, 128.6, 128.5, 127.5, 125.1, 125.0, 124.7, 121.5, 118.2, 114.9, 28.5, 28.4, 28.2, 28.1; <sup>31</sup>P NMR (CDCl<sub>3</sub>): 54.73 (s); HRMS (ESI) Calcd for C<sub>48</sub>H<sub>37</sub>F<sub>6</sub>N<sub>2</sub>O<sub>4</sub>P<sub>2</sub>PdS<sub>2</sub> (M+H): 1051.0619; Found: 1051.0616.

### Preparation of Compound 6a

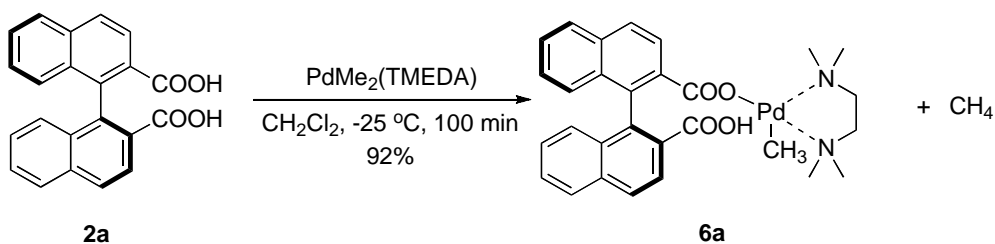

To a solution of PdMe<sub>2</sub>(TMEDA) (0.025 g, 0.10 mmol) in CH<sub>2</sub>Cl<sub>2</sub> (0.3 mL) in the Schlenk tube under N<sub>2</sub> was added a solution of (*S*)-1,1'-binaphthyl-2,2'-dicarboxylic acid (0.034 g, 0.10 mmol) in CH<sub>2</sub>Cl<sub>2</sub> (2.7 mL). After the reaction mixture was stirred at -25 °C for 100 min, pentane was added. The resulting suspension was filtered. The filter cake was washed with pentane, dissolved in CHCl<sub>3</sub> and concentrated under vacuum to give complex **6a** as white solid (0.054 g, 92%) (the crystal for the X-ray structure was obtained from a CH<sub>2</sub>Cl<sub>2</sub>/Pentane solvent at rt). decomp. 210 °C;  $[\alpha]_D^{20} = -185.9$  (*c* 0.34, CHCl<sub>3</sub>); IR (film) 3405, 2879, 1719, 1546, 1419 cm<sup>-1</sup>; <sup>1</sup>H NMR (400 MHz, CDCl<sub>3</sub>) δ 15.39 (s, 1H), 7.95 (d, *J* = 8.8 Hz, 2H), 7.90-7.79 (m, 3H), 7.68 (d, *J* = 8.4 Hz, 1H), 7.46-7.38 (m, 2H), 7.25-7.14 (m, 2H), 7.06-6.96 (m, 2H), 2.63-2.51 (m, 1H), 2.55 (s, 3H), 2.53 (s, 3H), 2.48-2.40 (m, 1H), 2.33-2.24 (m, 1H), 2.19-2.11 (m, 1H), 1.85 (s, 3H), 1.56 (s, 3H), 0.20 (s, 3H); <sup>13</sup>C NMR (100 MHz, CDCl<sub>3</sub>) δ 177.7, 171.9, 136.1, 134.7, 134.2, 133.9, 133.7, 133.0,

132.8, 131.9, 128.9, 128.4, 128.12, 128.06, 127.4, 127.3, 127.1, 126.9, 126.82, 126.79, 125.1, 124.3, 63.7, 57.3, 51.7, 51.2, 47.6, 46.7, -2.4; HRMS (ESI) Calcd for  $C_{29}H_{33}N_2O_4Pd$  (M+H): 579.1481; Found: 579.1486.

### Preparation of Compound 6b

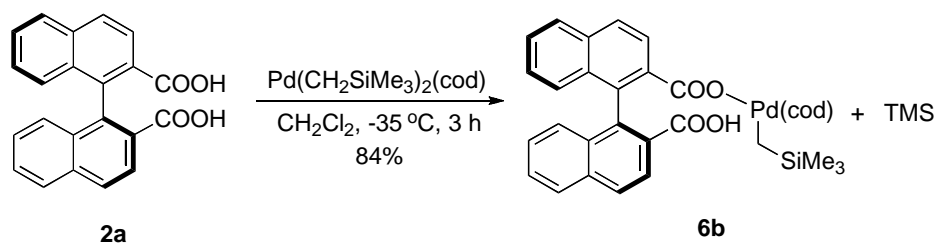

A solution of (*S*)-1,1'-binaphthyl-2,2'-dicarboxylic acid (0.034 g, 0.10 mmol) and  $Pd(CH_2SiMe_3)_2(cod)$  (0.039 g, 0.10 mmol) in  $CH_2Cl_2$  (1 mL) in the Schlenk Tube was stirred at  $-35\text{ }^\circ C$  under  $N_2$  for 3 h. Upon addition of pentane, the reaction mixture was filtered. The filter cake was washed with pentane and dried under vacuum to give complex **6b** as white solid (0.054 g, 84%). decomp.  $172\text{ }^\circ C$ ;  $[\alpha]_D^{20} = -184.8$  (*c* 0.81,  $CHCl_3$ ); IR (film) 3402, 3058, 2947, 2887, 1723, 1544, 1411  $cm^{-1}$ ;  $^1H$  NMR (400 MHz,  $CDCl_3$ )  $\delta$  14.74 (s, 1H), 7.97 (d, *J* = 8.4 Hz, 2H), 7.86 (d, *J* = 8.0 Hz, 2H), 7.80 (d, *J* = 8.4 Hz, 2H), 7.42 (t, *J* = 7.6 Hz, 2H), 7.22 (t, *J* = 7.6 Hz, 2H), 7.03 (d, *J* = 8.4 Hz, 2H), 4.90-4.79 (m, 2H), 4.67-4.59 (m, 1H), 4.33-4.24 (m, 1H), 2.50-2.25 (m, 4H), 2.14-1.93 (m, 4H), 1.26 (d, *J* = 10.8 Hz, 1H), 1.07 (d, *J* = 10.8 Hz, 1H), 0.09 (s, 9H);  $^{13}C$  NMR (100 MHz,  $CDCl_3$ )  $\delta$  174.2, 134.9, 134.1, 133.4, 132.9, 128.8, 128.1, 127.3, 127.03, 126.97, 124.4, 122.4, 122.2, 96.6, 96.4, 31.0, 30.8, 27.16, 27.15, 26.7, -1.6; Anal. Calcd for  $C_{34}H_{36}O_4PdSi$ : C, 63.49; H, 5.64. Found: C, 63.55; H, 5.79.

## Preparation of Compound 6c

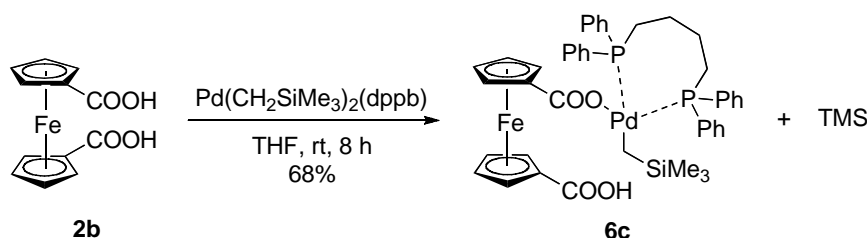

A suspension of  $\text{Pd}(\text{CH}_2\text{SiMe}_3)_2(\text{dppb})$  (0.057 g, 0.080 mmol) and 1,1'-ferrocenedicarboxylic acid (0.023 g, 0.080 mmol) in the Schlenk tube was stirred at rt under  $\text{N}_2$  for 8 h and then centrifuged. Upon removal of the solvent, the solid was dissolved in  $\text{CHCl}_3$  and filtered to remove any solid impurity. The filtrate was concentrated to give complex **6c** as yellow solid (0.048 g, 68%) (the crystal for the X-ray structure was obtained from a  $\text{CH}_2\text{Cl}_2/\text{Et}_2\text{O}$  solvent at rt). decomp. 179-182 °C; IR (film) 3443, 3053, 2925, 1701, 1544, 1466, 1383  $\text{cm}^{-1}$ ;  $^1\text{H}$  NMR (400 MHz,  $\text{CDCl}_3$ )  $\delta$  14.27 (s, 1H), 7.83-7.65 (m, 8H), 7.53-7.32 (m, 12H), 4.32-4.05 (m, 8H), 2.51-2.41 (m, 2H), 2.33-2.22 (m, 2H), 2.01-1.86 (m, 2H), 1.59-1.45 (m, 2H), 0.93-0.84 (m, 2H), -0.30 (s, 9H);  $^{31}\text{P}$  NMR ( $\text{CDCl}_3$ ): 33.16 (s), 15.74 (s); HRMS (ESI) Calcd for  $\text{C}_{44}\text{H}_{48}\text{FeNaO}_4\text{P}_2\text{PdSi}$  (M+Na): 915.1091; Found: 915.1098.

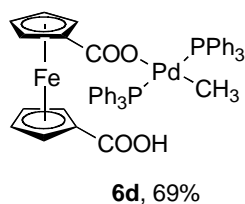

Prepared similarly as compound **6c**. Yellow solid (0.051 g, 69%) (the crystal for the X-ray structure was obtained from a  $\text{CH}_2\text{Cl}_2/\text{Et}_2\text{O}$  solvent at rt). decomp. 164-166 °C; IR (film) 3423, 2922, 1691, 1435, 1384  $\text{cm}^{-1}$ ;  $^1\text{H}$  NMR (400 MHz,  $\text{CDCl}_3$ )  $\delta$  7.76-7.66 (m, 12H), 7.44-7.34 (m, 18H), 4.02-3.64 (m, 8H), -0.01--0.08 (m, 3H);  $^{31}\text{P}$  NMR ( $\text{CDCl}_3$ ): 28.67 (s); HRMS (ESI) Calcd for  $\text{C}_{49}\text{H}_{42}\text{FeNaO}_4\text{P}_2\text{Pd}$  (M+Na): 941.0854; Found: 941.0887.

### Preparation of Compound 6e

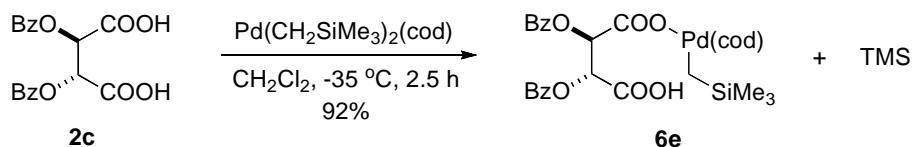

A solution of  $\text{Pd}(\text{CH}_2\text{SiMe}_3)_2(\text{cod})$  (0.058 g, 0.15 mmol) in  $\text{CH}_2\text{Cl}_2$  (0.3 mL) in the Schlenk Tube under  $\text{N}_2$  was added a solution of dibenzoyl-L-tartaric acid (0.054 g, 0.15 mmol) in  $\text{CH}_2\text{Cl}_2$  (0.7 mL). After the reaction mixture was stirred at  $-35\text{ }^\circ\text{C}$  for 3 h, pentane was added. The resulting suspension was filtered. The filter cake was washed with pentane and dried under vacuum to give complex **6e** as white solid (0.091 g, 92%). mp.  $104\text{-}106\text{ }^\circ\text{C}$ ;  $[\alpha]_{\text{D}}^{20} = +1.89$  ( $c$  1.32,  $\text{CHCl}_3$ ); IR (film) 3434, 2947, 2888, 1719, 1271,  $1116\text{ cm}^{-1}$ ;  $^1\text{H NMR}$  (400 MHz,  $\text{CDCl}_3$ )  $\delta$  8.12-8.04 (m, 4H), 7.54-7.46 (m, 2H), 7.42-7.33 (m, 4H), 5.95 (s, 2H), 5.82-5.72 (m, 1H), 5.67-5.58 (m, 1H), 5.01-4.93 (m, 1H), 4.91-4.84 (m, 1H), 2.66-2.47 (m, 2H), 2.46-2.29 (m, 4H), 2.28-2.14 (m, 2H), 1.29 (d,  $J = 10.4\text{ Hz}$ , 1H), 1.11 (d,  $J = 10.4\text{ Hz}$ , 1H), 0.03 (s, 9H);  $^{13}\text{C NMR}$  (100 MHz,  $\text{CDCl}_3$ )  $\delta$  170.1, 165.5, 133.0, 130.1, 129.6, 128.2, 122.5, 122.4, 96.7, 95.9, 73.0, 30.9, 30.6, 27.4, 27.1, 26.6, 1.4; HRMS (ESI) Calcd for  $\text{C}_{30}\text{H}_{36}\text{NaO}_8\text{PdSi}$  ( $\text{M}+\text{Na}$ ): 681.1118; Found: 681.1115.

### Preparation of Compound 7a

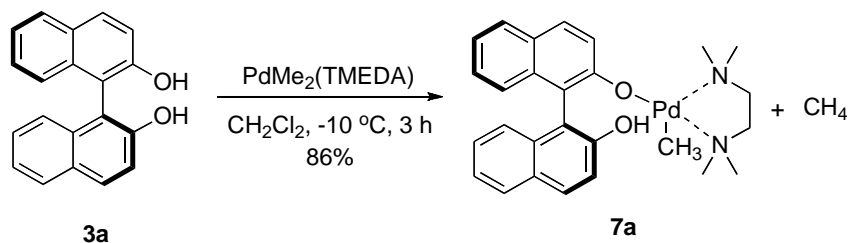

A solution of  $\text{PdMe}_2(\text{TMEDA})$  (0.051 g, 0.20 mmol) and (*S*)-BINOL (0.057 g, 0.20 mmol) in  $\text{CH}_2\text{Cl}_2$  (0.8 mL) was stirred in the Schlenk tube at  $-10\text{ }^\circ\text{C}$  under  $\text{N}_2$ . After the reaction mixture was stirred for 3 h, hexane was added. The resulting suspension was

filtered. The filter cake was washed with hexane and dried under vacuum to give complex **7a** as yellow solid (0.090 g, 86%) (the crystal for the X-ray structure was obtained from a CH<sub>2</sub>Cl<sub>2</sub>/Pentane solvent at rt). decomp. 215-217 °C;  $[\alpha]_D^{20} = +291.8$  (*c* 0.77, CHCl<sub>3</sub>); IR (film) 3385, 2876, 1613, 1591, 1461, 1337 cm<sup>-1</sup>; <sup>1</sup>H NMR (400 MHz, CDCl<sub>3</sub>) δ 8.68 (s, 1H), 7.89 (d, *J* = 8.4 Hz, 1H), 7.81-7.65 (m, 4H), 7.34 (d, *J* = 8.4 Hz, 1H), 7.24-7.15 (m, 2H), 7.12-6.94 (m, 3H), 6.87 (d, *J* = 8.4 Hz, 1H), 2.60-2.48 (m, 2H), 2.56 (s, 6H), 2.36-2.26 (m, 2H), 2.30 (s, 3H), 2.15 (s, 3H), 0.37 (s, 3H); <sup>13</sup>C NMR (100 MHz, CDCl<sub>3</sub>) δ 163.7, 154.1, 135.1, 134.7, 129.3, 128.7, 128.1, 127.9, 127.8, 127.2, 126.9, 126.8, 125.4, 125.3, 125.1, 122.3, 120.53, 120.48, 120.3, 116.4, 63.6, 57.3, 51.3, 51.1, 47.6, 47.4, -2.0; Anal. Calcd for C<sub>27</sub>H<sub>32</sub>N<sub>2</sub>O<sub>2</sub>Pd: C, 62.01; H, 6.17; N, 5.36. Found: C, 61.71; H, 6.32; N, 5.24.

### Preparation of Compound 7b

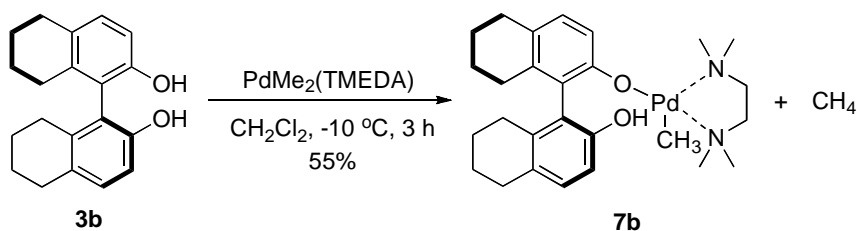

To a solution of PdMe<sub>2</sub>(TMEDA) (0.051 g, 0.20 mmol) in CH<sub>2</sub>Cl<sub>2</sub> (0.1 mL) in the Schlenk tube under N<sub>2</sub> was added a solution of (*S*)-H<sub>8</sub>-BINOL (0.059 g, 0.20 mmol) in CH<sub>2</sub>Cl<sub>2</sub> (0.4 mL). After the reaction mixture was stirred at -10 °C for 3 h, hexane was added. The resulting suspension was filtered. The filter cake was washed with hexane and dried under vacuum to give complex **7b** as white solid (0.059 g, 55%) (the crystal for the X-ray structure was obtained from a CH<sub>2</sub>Cl<sub>2</sub>/Pentane solvent at rt). mp. 134-136 °C;  $[\alpha]_D^{20} = +106.9$  (*c* 0.29, THF); IR (film) 3483, 2921, 1584, 1461, 1278 cm<sup>-1</sup>; <sup>1</sup>H NMR (400 MHz, CDCl<sub>3</sub>) δ 7.35 (d, *J* = 8.4 Hz, 1H), 6.90-6.83 (m, 2H), 6.71 (d, *J* = 8.0 Hz, 1H), 5.89 (s, 1H), 2.79-2.64 (m, 4H), 2.64-2.55 (m, 2H), 2.61 (s, 3H), 2.58 (s, 3H), 2.46-2.29 (m, 4H), 2.41 (s, 3H), 2.35 (s, 3H), 2.20-2.06 (m, 2H), 1.75-1.52 (m, 8H), 0.30 (s, 3H); <sup>13</sup>C NMR (100 MHz, CDCl<sub>3</sub>) δ 164.5, 151.5, 136.7, 136.6, 129.2, 128.6, 127.9, 127.2, 123.1, 122.3, 120.6, 112.6, 63.5, 57.4, 51.2, 51.1, 47.8, 29.7, 29.5, 27.73, 27.69, 23.8, 23.7, 23.53, 23.52, -2.4; HRMS



(ESI) Calcd for  $C_{26}H_{37}N_2O_2Pd(M-CH_3)$ : 515.1894; Found: 515.1886.

### Preparation of Compound 8a

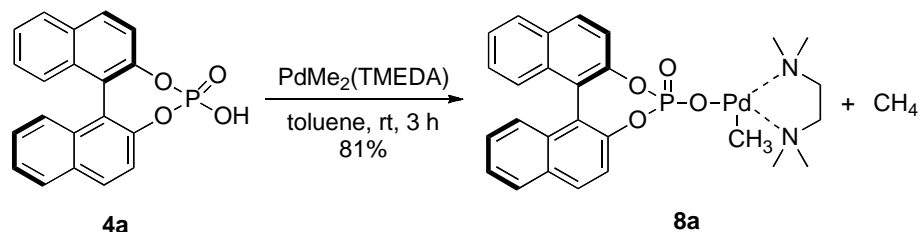

A solution of (*R*)-BINOL phosphoric acid (0.052 g, 0.15 mmol) and PdMe<sub>2</sub>(TMEDA) (0.038 g, 0.15 mmol) in toluene (1 mL) was stirred in the Schlenk Tube at rt under N<sub>2</sub>. The mixture was filtered after stirring for 3 h. The filter cake was washed with pentane and dried under vacuum to give complex **8a** as white solid (0.071 g, 81%). decomp. 230 °C;  $[\alpha]_D^{20} = -285.7$  (*c* 0.88, CHCl<sub>3</sub>); IR (film) 2883, 1591, 1464, 1270, 1099 cm<sup>-1</sup>; <sup>1</sup>H NMR (400 MHz, CDCl<sub>3</sub>) δ 7.95-7.85 (m, 4H), 7.58 (d, *J* = 8.8 Hz, 2H), 7.42-7.33 (m, 4H), 7.21 (t, *J* = 8.0 Hz, 2H), 2.60-2.52 (m, 2H), 2.58 (s, 3H), 2.56 (s, 3H), 2.47 (s, 3H), 2.42 (s, 3H), 2.37-2.32 (m, 2H), 0.58 (s, 3H); <sup>13</sup>C NMR (100 MHz, CDCl<sub>3</sub>) δ 149.5, 149.4, 132.8, 131.3, 130.2, 128.3, 127.3, 126.0, 124.8, 122.40, 122.38, 122.34, 122.32, 64.0, 57.2, 51.7, 51.6, 47.4, 47.3, -1.5; <sup>31</sup>P NMR (CDCl<sub>3</sub>): 9.73 (s); Anal. Calcd for C<sub>27</sub>H<sub>31</sub>N<sub>2</sub>O<sub>4</sub>PPd: C, 55.44; H, 5.34; N, 4.79. Found: C, 55.30; H, 5.25; N, 4.97.

Ref: J. Kanada and M. Tanaka, *Adv. Synth. Catal.*, 2011, **353**, 890.

### Preparation of Compound 8b

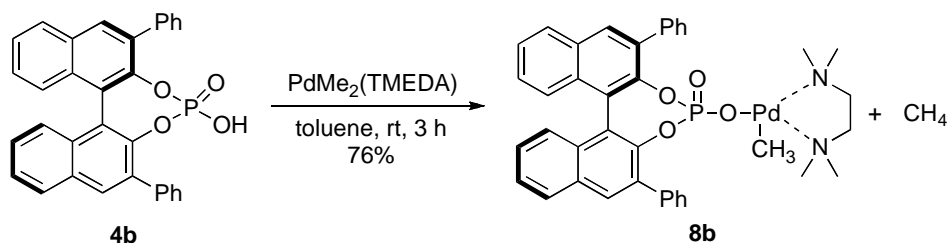

A solution of (*R*)-3,3'-biphenyl-BINOL phosphoric acid (0.050 g, 0.10 mmol) and

PdMe<sub>2</sub>(TMEDA) (0.025 g, 0.10 mmol) in toluene (1 mL) was stirred in the Schlenk Tube at rt under N<sub>2</sub>. The mixture was filtered after stirring for 3 h. The filter cake was washed with hexane and dried under vacuum to give complex **8b** as white solid (0.056 g, 76%). decomp. 214 °C; [α]<sub>D</sub><sup>20</sup> = -233.8 (c 0.28, CH<sub>2</sub>Cl<sub>2</sub>); IR (film) 3054, 2883, 1411, 1269, 1099 cm<sup>-1</sup>; <sup>1</sup>H NMR (400 MHz, CDCl<sub>3</sub>) δ 8.00-7.84 (m, 8H), 7.46-7.35 (m, 6H), 7.34-7.26 (m, 4H), 7.23-7.16 (m, 2H), 2.50-2.36 (m, 2H), 2.43 (s, 3H), 2.42 (s, 3H), 2.27-2.18 (m, 1H), 2.17-2.07 (m, 1H), 1.98 (s, 3H), 1.84 (s, 3H), 0.09 (s, 3H); <sup>13</sup>C NMR (100 MHz, CDCl<sub>3</sub>) δ 147.1, 147.0, 138.7, 134.6, 132.8, 131.2, 130.8, 130.6, 128.3, 128.2, 127.3, 127.1, 126.0, 125.1, 123.7, 123.6, 64.0, 57.0, 51.7, 51.4, 47.2, 46.8, -1.9; <sup>31</sup>P NMR (CDCl<sub>3</sub>): 8.11 (s); HRMS (ESI) Calcd for C<sub>39</sub>H<sub>40</sub>N<sub>2</sub>O<sub>4</sub>PPd(M+H): 737.1769; Found: 737.1764.

### Preparation of Compound **8c**

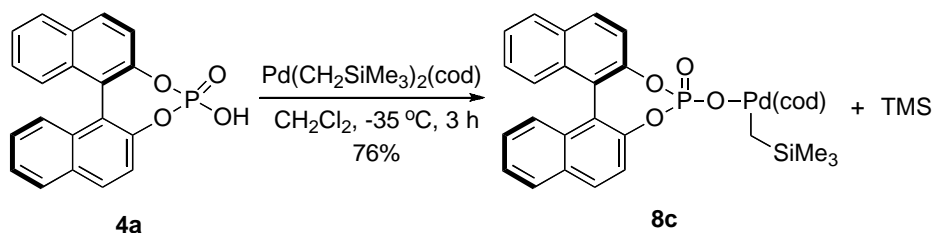

A solution of (*R*)-BINOL phosphoric acid (0.036 g, 0.10 mmol) and Pd(CH<sub>2</sub>SiMe<sub>3</sub>)<sub>2</sub>(cod) (0.039 g, 0.10 mmol) was stirred in the Schlenk Tube at -35 °C under N<sub>2</sub>. After the reaction mixture was stirred for 3 h, pentane was added. The resulting suspension was filtered. The filter cake was washed with pentane and dried under vacuum to give complex **8c** as white solid (0.050 g, 76%). decomp. 181 °C; [α]<sub>D</sub><sup>20</sup> = -281.7 (c 0.82, CHCl<sub>3</sub>); IR (film) 2946, 2887, 1507, 1242, 1103 cm<sup>-1</sup>; <sup>1</sup>H NMR (400 MHz, CDCl<sub>3</sub>) δ 7.98-7.86 (m, 4H), 7.55 (d, *J* = 8.8 Hz, 2H), 7.43-7.35 (m, 4H), 7.27-7.20 (m, 2H), 6.19-6.08 (m, 1H), 5.94-5.83 (m, 1H), 4.93-4.84 (m, 2H), 2.68-2.30 (m, 6H), 2.27-2.15 (m, 2H), 1.43 (d, *J* = 10.0 Hz, 1H), 1.37 (d, *J* = 10.0 Hz, 1H), 0.05 (s, 9H); <sup>13</sup>C NMR (100 MHz, CDCl<sub>3</sub>) δ 149.4, 149.3, 132.9, 131.4, 130.4, 128.4, 127.4, 126.2, 125.0, 124.31, 124.26, 122.41, 122.39, 122.2, 122.1, 95.0, 94.7, 31.2, 31.0, 30.3, 27.6, 27.3, 1.6; <sup>31</sup>P NMR (CDCl<sub>3</sub>): 6.68 (s); Anal. Calcd for C<sub>32</sub>H<sub>35</sub>O<sub>4</sub>PPdSi: C, 59.21; H, 5.43. Found: C, 59.20; H, 5.46.

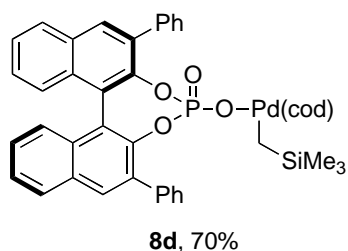

Prepared similarly as compound **8c**. White solid (0.056 g, 70%). decomp. 183 °C;  $[\alpha]_D^{20} = -216.4$  (*c* 0.81, CHCl<sub>3</sub>); IR (film) 3053, 2947, 2887, 1411, 1270, 1100 cm<sup>-1</sup>; <sup>1</sup>H NMR (400 MHz, CDCl<sub>3</sub>) δ 7.97 (s, 2H), 7.93-7.86 (m, 6H), 7.46-7.37 (m, 6H), 7.36-7.29 (m, 4H), 7.26-7.19 (m, 2H), 5.52-5.43 (m, 1H), 5.18-5.09 (m, 1H), 4.75-4.62 (m, 2H), 2.48-2.22 (m, 4H), 2.21-2.02 (m, 4H), 1.08 (d, *J*=10.0 Hz, 1H), 1.02 (d, *J*=10.0 Hz, 1H), -0.25 (s, 9H); <sup>13</sup>C NMR (100 MHz, CDCl<sub>3</sub>) δ 147.0, 146.9, 138.6, 134.78, 134.76, 132.7, 131.2, 130.8, 130.5, 128.3, 128.2, 127.3, 127.2, 126.0, 125.1, 124.0, 123.48, 123.46, 123.4, 94.7, 94.2, 31.0, 30.8, 29.4, 27.29, 27.28, -1.3; <sup>31</sup>P NMR (CDCl<sub>3</sub>): 5.17 (s); Anal. Calcd for C<sub>44</sub>H<sub>43</sub>O<sub>4</sub>PPdSi: C, 65.95; H, 5.41. Found: C, 65.71; H, 5.43.

### The X-ray Structure of Compound 5

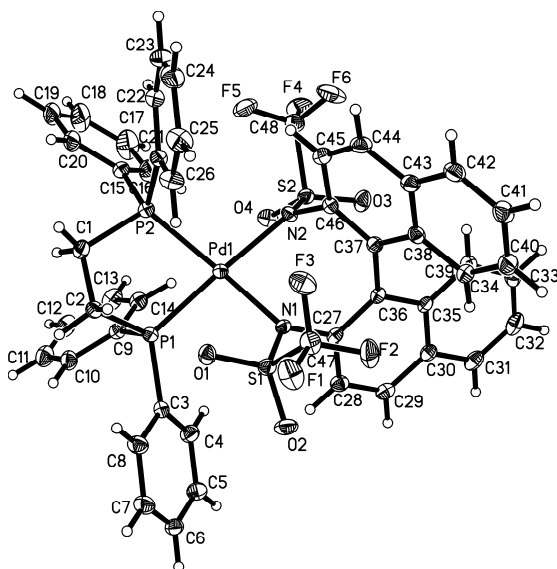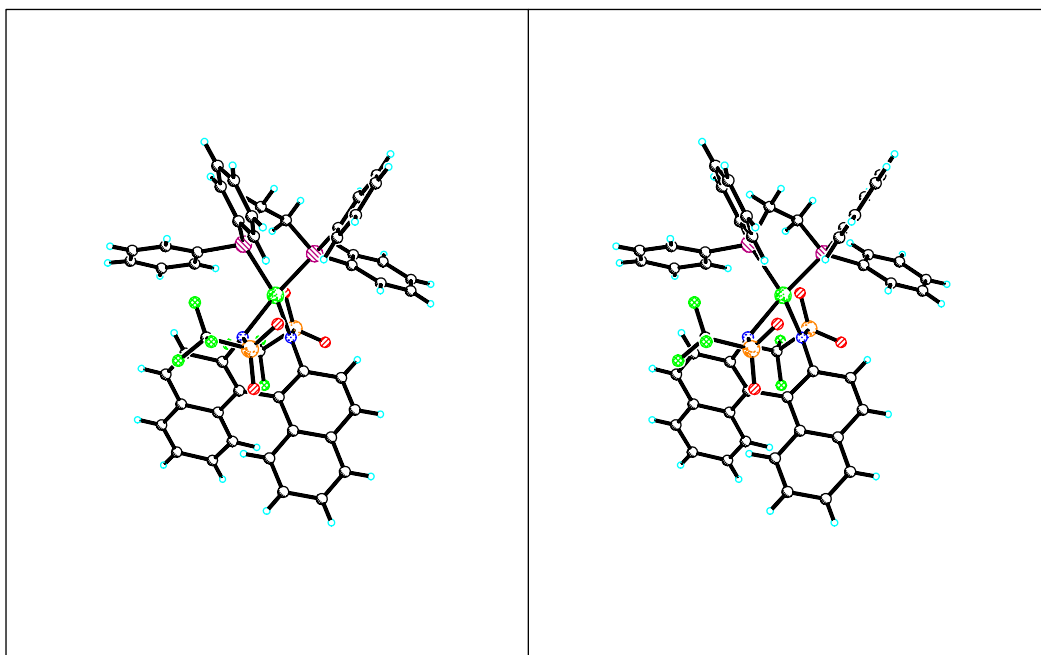

Table 1. Crystal data and structure refinement for **5**.

|                                   |                                                                                                                   |
|-----------------------------------|-------------------------------------------------------------------------------------------------------------------|
| Identification code               | sa1575                                                                                                            |
| Empirical formula                 | C <sub>48</sub> H <sub>36</sub> F <sub>6</sub> N <sub>2</sub> O <sub>4</sub> P <sub>2</sub> Pd S <sub>2</sub>     |
| Formula weight                    | 1051.25                                                                                                           |
| Temperature                       | 173(2) K                                                                                                          |
| Wavelength                        | 0.71073 Å                                                                                                         |
| Crystal system, space group       | Orthorhombic, P2(1)2(1)2(1)                                                                                       |
| Unit cell dimensions              | a = 13.8039(17) Å    alpha = 90 deg.<br>b = 14.5782(16) Å    beta = 90 deg.<br>c = 22.466(3) Å    gamma = 90 deg. |
| Volume                            | 4521.0(9) Å <sup>3</sup>                                                                                          |
| Z, Calculated density             | 4, 1.544 Mg/m <sup>3</sup>                                                                                        |
| Absorption coefficient            | 0.646 mm <sup>-1</sup>                                                                                            |
| F(000)                            | 2128                                                                                                              |
| Crystal size                      | 0.32 x 0.31 x 0.13 mm                                                                                             |
| Theta range for data collection   | 2.72 to 27.48 deg.                                                                                                |
| Limiting indices                  | -13<=h<=17, -16<=k<=18, -14<=l<=29                                                                                |
| Reflections collected / unique    | 28506 / 10315 [R(int) = 0.0519]                                                                                   |
| Completeness to theta = 27.48     | 99.7 %                                                                                                            |
| Absorption correction             | Semi-empirical from equivalents                                                                                   |
| Max. and min. transmission        | 0.9208 and 0.8201                                                                                                 |
| Refinement method                 | Full-matrix least-squares on F <sup>2</sup>                                                                       |
| Data / restraints / parameters    | 10315 / 0 / 586                                                                                                   |
| Goodness-of-fit on F <sup>2</sup> | 1.078                                                                                                             |
| Final R indices [I>2sigma(I)]     | R1 = 0.0449, wR2 = 0.0889                                                                                         |
| R indices (all data)              | R1 = 0.0479, wR2 = 0.0914                                                                                         |
| Absolute structure parameter      | 0.01(2)                                                                                                           |
| Largest diff. peak and hole       | 0.674 and -0.648 e.Å <sup>-3</sup>                                                                                |

Table 2. Atomic coordinates ( $\times 10^4$ ) and equivalent isotropic displacement parameters ( $\text{\AA}^2 \times 10^3$ ) for **5**.

U(eq) is defined as one third of the trace of the orthogonalized Uij tensor.

|       | x        | y       | z        | U(eq) |
|-------|----------|---------|----------|-------|
| Pd(1) | 862(1)   | 3796(1) | 9895(1)  | 23(1) |
| S(1)  | 1500(1)  | 4032(1) | 8530(1)  | 28(1) |
| S(2)  | -770(1)  | 5113(1) | 10444(1) | 27(1) |
| P(1)  | 1347(1)  | 2356(1) | 9690(1)  | 25(1) |
| P(2)  | 1708(1)  | 3532(1) | 10753(1) | 28(1) |
| F(1)  | 2837(2)  | 4949(2) | 7969(1)  | 53(1) |
| F(2)  | 1456(2)  | 5636(2) | 7986(1)  | 52(1) |
| F(3)  | 2347(2)  | 5608(2) | 8774(1)  | 49(1) |
| F(4)  | -1300(2) | 5617(2) | 11519(1) | 57(1) |
| F(5)  | 211(2)   | 5331(2) | 11443(1) | 57(1) |
| F(6)  | -365(3)  | 6574(2) | 11082(2) | 66(1) |
| O(1)  | 2293(2)  | 3597(2) | 8828(1)  | 31(1) |
| O(2)  | 1169(2)  | 3679(2) | 7970(1)  | 39(1) |
| O(3)  | -1511(2) | 5682(2) | 10191(1) | 40(1) |
| O(4)  | -1023(2) | 4196(2) | 10622(1) | 34(1) |
| N(1)  | 681(2)   | 4236(2) | 8992(1)  | 23(1) |
| N(2)  | 207(2)   | 5092(2) | 10107(2) | 24(1) |
| C(1)  | 2559(3)  | 2579(3) | 10598(2) | 33(1) |
| C(2)  | 2598(3)  | 2320(3) | 9939(2)  | 29(1) |
| C(3)  | 1201(3)  | 1835(3) | 8969(2)  | 27(1) |
| C(4)  | 268(3)   | 1601(3) | 8796(2)  | 34(1) |
| C(5)  | 103(3)   | 1146(3) | 8263(2)  | 40(1) |
| C(6)  | 885(4)   | 904(3)  | 7909(2)  | 40(1) |
| C(7)  | 1812(3)  | 1122(3) | 8084(2)  | 41(1) |
| C(8)  | 1980(3)  | 1594(3) | 8609(2)  | 35(1) |
| C(9)  | 760(3)   | 1508(2) | 10161(2) | 29(1) |
| C(10) | 1128(3)  | 610(3)  | 10147(2) | 37(1) |
| C(11) | 714(4)   | -44(3)  | 10517(2) | 44(1) |
| C(12) | -40(4)   | 166(3)  | 10889(2) | 47(1) |
| C(13) | -412(3)  | 1049(3) | 10891(2) | 44(1) |
| C(14) | -13(3)   | 1718(3) | 10525(2) | 34(1) |
| C(15) | 1273(3)  | 3244(3) | 11487(2) | 34(1) |
| C(16) | 290(4)   | 3214(3) | 11618(2) | 45(1) |
| C(17) | -26(5)   | 2938(4) | 12169(3) | 71(2) |
| C(18) | 633(5)   | 2688(4) | 12602(2) | 73(2) |
| C(19) | 1619(4)  | 2734(3) | 12484(2) | 57(2) |

|        |           |          |           |        |
|--------|-----------|----------|-----------|--------|
| C (20) | 1930 (4)  | 3003 (3) | 11924 (2) | 41 (1) |
| C (21) | 2484 (3)  | 4533 (3) | 10843 (2) | 31 (1) |
| C (22) | 2564 (3)  | 5007 (3) | 11383 (2) | 40 (1) |
| C (23) | 3213 (4)  | 5719 (3) | 11427 (3) | 50 (1) |
| C (24) | 3769 (4)  | 5975 (3) | 10955 (3) | 50 (1) |
| C (25) | 3668 (3)  | 5534 (3) | 10403 (3) | 49 (1) |
| C (26) | 3022 (3)  | 4807 (3) | 10357 (2) | 43 (1) |
| C (27) | -235 (3)  | 4565 (3) | 8792 (2)  | 25 (1) |
| C (28) | -860 (3)  | 3958 (2) | 8480 (2)  | 30 (1) |
| C (29) | -1753 (3) | 4241 (3) | 8298 (2)  | 30 (1) |
| C (30) | -2098 (3) | 5133 (3) | 8435 (2)  | 27 (1) |
| C (31) | -3024 (3) | 5436 (3) | 8249 (2)  | 36 (1) |
| C (32) | -3351 (3) | 6295 (4) | 8382 (2)  | 43 (1) |
| C (33) | -2760 (3) | 6887 (3) | 8715 (2)  | 38 (1) |
| C (34) | -1868 (3) | 6613 (3) | 8912 (2)  | 33 (1) |
| C (35) | -1493 (3) | 5736 (3) | 8758 (2)  | 25 (1) |
| C (36) | -530 (3)  | 5456 (3) | 8930 (2)  | 23 (1) |
| C (37) | 157 (3)   | 6101 (2) | 9225 (2)  | 24 (1) |
| C (38) | 503 (3)   | 6911 (3) | 8927 (2)  | 26 (1) |
| C (39) | 187 (3)   | 7167 (3) | 8352 (2)  | 30 (1) |
| C (40) | 531 (3)   | 7936 (3) | 8077 (2)  | 37 (1) |
| C (41) | 1222 (3)  | 8501 (3) | 8364 (2)  | 39 (1) |
| C (42) | 1539 (3)  | 8278 (3) | 8922 (2)  | 37 (1) |
| C (43) | 1200 (3)  | 7484 (3) | 9216 (2)  | 30 (1) |
| C (44) | 1547 (3)  | 7236 (3) | 9782 (2)  | 34 (1) |
| C (45) | 1215 (3)  | 6471 (2) | 10066 (2) | 32 (1) |
| C (46) | 510 (3)   | 5905 (2) | 9787 (2)  | 25 (1) |
| C (47) | 2058 (3)  | 5125 (3) | 8303 (2)  | 38 (1) |
| C (48) | -545 (3)  | 5682 (3) | 11161 (2) | 37 (1) |

---

Table 3. Bond lengths [Å] and angles [deg] for **5**.

---

|            |            |
|------------|------------|
| Pd(1)–N(1) | 2.144(3)   |
| Pd(1)–N(2) | 2.148(3)   |
| Pd(1)–P(1) | 2.2515(10) |
| Pd(1)–P(2) | 2.2850(11) |
| S(1)–O(1)  | 1.432(3)   |
| S(1)–O(2)  | 1.435(3)   |
| S(1)–N(1)  | 1.562(3)   |
| S(1)–C(47) | 1.841(5)   |
| S(2)–O(3)  | 1.435(3)   |
| S(2)–O(4)  | 1.437(3)   |
| S(2)–N(2)  | 1.547(3)   |
| S(2)–C(48) | 1.838(5)   |
| P(1)–C(3)  | 1.800(4)   |
| P(1)–C(2)  | 1.816(4)   |
| P(1)–C(9)  | 1.817(4)   |
| P(2)–C(15) | 1.804(5)   |
| P(2)–C(21) | 1.822(4)   |
| P(2)–C(1)  | 1.852(4)   |
| F(1)–C(47) | 1.338(5)   |
| F(2)–C(47) | 1.325(5)   |
| F(3)–C(47) | 1.332(5)   |
| F(4)–C(48) | 1.320(5)   |
| F(5)–C(48) | 1.324(5)   |
| F(6)–C(48) | 1.335(5)   |
| N(1)–C(27) | 1.426(5)   |
| N(2)–C(46) | 1.449(4)   |
| C(1)–C(2)  | 1.528(6)   |
| C(1)–H(1B) | 0.9900     |
| C(1)–H(1A) | 0.9900     |
| C(2)–H(2B) | 0.9900     |
| C(2)–H(2A) | 0.9900     |
| C(3)–C(4)  | 1.388(6)   |
| C(3)–C(8)  | 1.391(6)   |
| C(4)–C(5)  | 1.387(6)   |
| C(4)–H(4)  | 0.9500     |
| C(5)–C(6)  | 1.388(6)   |
| C(5)–H(5)  | 0.9500     |
| C(6)–C(7)  | 1.375(7)   |
| C(6)–H(6)  | 0.9500     |
| C(7)–C(8)  | 1.386(6)   |
| C(7)–H(7)  | 0.9500     |
| C(8)–H(8)  | 0.9500     |



|             |          |
|-------------|----------|
| C(9)–C(14)  | 1.379(6) |
| C(9)–C(10)  | 1.405(5) |
| C(10)–C(11) | 1.388(6) |
| C(10)–H(10) | 0.9500   |
| C(11)–C(12) | 1.368(7) |
| C(11)–H(11) | 0.9500   |
| C(12)–C(13) | 1.385(7) |
| C(12)–H(12) | 0.9500   |
| C(13)–C(14) | 1.390(6) |
| C(13)–H(13) | 0.9500   |
| C(14)–H(14) | 0.9500   |
| C(15)–C(20) | 1.382(6) |
| C(15)–C(16) | 1.390(6) |
| C(16)–C(17) | 1.374(7) |
| C(16)–H(16) | 0.9500   |
| C(17)–C(18) | 1.380(8) |
| C(17)–H(17) | 0.9500   |
| C(18)–C(19) | 1.389(8) |
| C(18)–H(18) | 0.9500   |
| C(19)–C(20) | 1.386(7) |
| C(19)–H(19) | 0.9500   |
| C(20)–H(20) | 0.9500   |
| C(21)–C(26) | 1.379(6) |
| C(21)–C(22) | 1.401(6) |
| C(22)–C(23) | 1.375(6) |
| C(22)–H(22) | 0.9500   |
| C(23)–C(24) | 1.361(8) |
| C(23)–H(23) | 0.9500   |
| C(24)–C(25) | 1.404(7) |
| C(24)–H(24) | 0.9500   |
| C(25)–C(26) | 1.389(6) |
| C(25)–H(25) | 0.9500   |
| C(26)–H(26) | 0.9500   |
| C(27)–C(36) | 1.395(5) |
| C(27)–C(28) | 1.420(5) |
| C(28)–C(29) | 1.363(6) |
| C(28)–H(28) | 0.9500   |
| C(29)–C(30) | 1.420(6) |
| C(29)–H(29) | 0.9500   |
| C(30)–C(35) | 1.413(5) |
| C(30)–C(31) | 1.415(5) |
| C(31)–C(32) | 1.364(6) |
| C(31)–H(31) | 0.9500   |
| C(32)–C(33) | 1.403(7) |

|                 |            |
|-----------------|------------|
| C(32)–H(32)     | 0.9500     |
| C(33)–C(34)     | 1.369(6)   |
| C(33)–H(33)     | 0.9500     |
| C(34)–C(35)     | 1.421(5)   |
| C(34)–H(34)     | 0.9500     |
| C(35)–C(36)     | 1.443(5)   |
| C(36)–C(37)     | 1.491(5)   |
| C(37)–C(46)     | 1.384(5)   |
| C(37)–C(38)     | 1.438(5)   |
| C(38)–C(39)     | 1.414(5)   |
| C(38)–C(43)     | 1.431(5)   |
| C(39)–C(40)     | 1.364(6)   |
| C(39)–H(39)     | 0.9500     |
| C(40)–C(41)     | 1.416(6)   |
| C(40)–H(40)     | 0.9500     |
| C(41)–C(42)     | 1.366(6)   |
| C(41)–H(41)     | 0.9500     |
| C(42)–C(43)     | 1.412(6)   |
| C(42)–H(42)     | 0.9500     |
| C(43)–C(44)     | 1.407(6)   |
| C(44)–C(45)     | 1.364(5)   |
| C(44)–H(44)     | 0.9500     |
| C(45)–C(46)     | 1.421(5)   |
| C(45)–H(45)     | 0.9500     |
|                 |            |
| N(1)–Pd(1)–N(2) | 84.13(12)  |
| N(1)–Pd(1)–P(1) | 96.88(8)   |
| N(2)–Pd(1)–P(1) | 172.23(8)  |
| N(1)–Pd(1)–P(2) | 155.26(9)  |
| N(2)–Pd(1)–P(2) | 100.19(10) |
| P(1)–Pd(1)–P(2) | 82.13(4)   |
| O(1)–S(1)–O(2)  | 119.63(18) |
| O(1)–S(1)–N(1)  | 109.07(17) |
| O(2)–S(1)–N(1)  | 114.86(17) |
| O(1)–S(1)–C(47) | 101.16(19) |
| O(2)–S(1)–C(47) | 101.6(2)   |
| N(1)–S(1)–C(47) | 108.75(18) |
| O(3)–S(2)–O(4)  | 118.30(19) |
| O(3)–S(2)–N(2)  | 115.99(18) |
| O(4)–S(2)–N(2)  | 109.24(16) |
| O(3)–S(2)–C(48) | 102.0(2)   |
| O(4)–S(2)–C(48) | 102.62(19) |
| N(2)–S(2)–C(48) | 106.9(2)   |
| C(3)–P(1)–C(2)  | 111.83(18) |

|                  |            |
|------------------|------------|
| C(3)-P(1)-C(9)   | 100.71(18) |
| C(2)-P(1)-C(9)   | 103.03(18) |
| C(3)-P(1)-Pd(1)  | 122.98(13) |
| C(2)-P(1)-Pd(1)  | 104.28(13) |
| C(9)-P(1)-Pd(1)  | 112.50(13) |
| C(15)-P(2)-C(21) | 106.3(2)   |
| C(15)-P(2)-C(1)  | 102.0(2)   |
| C(21)-P(2)-C(1)  | 104.40(19) |
| C(15)-P(2)-Pd(1) | 129.75(16) |
| C(21)-P(2)-Pd(1) | 105.00(14) |
| C(1)-P(2)-Pd(1)  | 107.02(14) |
| C(27)-N(1)-S(1)  | 119.8(3)   |
| C(27)-N(1)-Pd(1) | 120.2(2)   |
| S(1)-N(1)-Pd(1)  | 119.17(17) |
| C(46)-N(2)-S(2)  | 118.6(2)   |
| C(46)-N(2)-Pd(1) | 119.2(2)   |
| S(2)-N(2)-Pd(1)  | 119.51(15) |
| C(2)-C(1)-P(2)   | 112.9(3)   |
| C(2)-C(1)-H(1B)  | 109.0      |
| P(2)-C(1)-H(1B)  | 109.0      |
| C(2)-C(1)-H(1A)  | 109.0      |
| P(2)-C(1)-H(1A)  | 109.0      |
| H(1B)-C(1)-H(1A) | 107.8      |
| C(1)-C(2)-P(1)   | 104.9(3)   |
| C(1)-C(2)-H(2B)  | 110.8      |
| P(1)-C(2)-H(2B)  | 110.8      |
| C(1)-C(2)-H(2A)  | 110.8      |
| P(1)-C(2)-H(2A)  | 110.8      |
| H(2B)-C(2)-H(2A) | 108.8      |
| C(4)-C(3)-C(8)   | 119.4(4)   |
| C(4)-C(3)-P(1)   | 117.4(3)   |
| C(8)-C(3)-P(1)   | 122.9(3)   |
| C(5)-C(4)-C(3)   | 120.9(4)   |
| C(5)-C(4)-H(4)   | 119.6      |
| C(3)-C(4)-H(4)   | 119.6      |
| C(4)-C(5)-C(6)   | 119.2(4)   |
| C(4)-C(5)-H(5)   | 120.4      |
| C(6)-C(5)-H(5)   | 120.4      |
| C(7)-C(6)-C(5)   | 120.1(4)   |
| C(7)-C(6)-H(6)   | 119.9      |
| C(5)-C(6)-H(6)   | 119.9      |
| C(6)-C(7)-C(8)   | 120.9(4)   |
| C(6)-C(7)-H(7)   | 119.5      |
| C(8)-C(7)-H(7)   | 119.5      |

|                   |          |
|-------------------|----------|
| C(7)-C(8)-C(3)    | 119.4(4) |
| C(7)-C(8)-H(8)    | 120.3    |
| C(3)-C(8)-H(8)    | 120.3    |
| C(14)-C(9)-C(10)  | 119.9(4) |
| C(14)-C(9)-P(1)   | 122.6(3) |
| C(10)-C(9)-P(1)   | 117.5(3) |
| C(11)-C(10)-C(9)  | 118.6(4) |
| C(11)-C(10)-H(10) | 120.7    |
| C(9)-C(10)-H(10)  | 120.7    |
| C(12)-C(11)-C(10) | 121.6(4) |
| C(12)-C(11)-H(11) | 119.2    |
| C(10)-C(11)-H(11) | 119.2    |
| C(11)-C(12)-C(13) | 119.5(4) |
| C(11)-C(12)-H(12) | 120.2    |
| C(13)-C(12)-H(12) | 120.2    |
| C(12)-C(13)-C(14) | 120.2(4) |
| C(12)-C(13)-H(13) | 119.9    |
| C(14)-C(13)-H(13) | 119.9    |
| C(9)-C(14)-C(13)  | 120.1(4) |
| C(9)-C(14)-H(14)  | 119.9    |
| C(13)-C(14)-H(14) | 119.9    |
| C(20)-C(15)-C(16) | 118.8(5) |
| C(20)-C(15)-P(2)  | 119.4(4) |
| C(16)-C(15)-P(2)  | 121.7(4) |
| C(17)-C(16)-C(15) | 120.7(5) |
| C(17)-C(16)-H(16) | 119.7    |
| C(15)-C(16)-H(16) | 119.7    |
| C(16)-C(17)-C(18) | 120.3(6) |
| C(16)-C(17)-H(17) | 119.8    |
| C(18)-C(17)-H(17) | 119.8    |
| C(17)-C(18)-C(19) | 119.9(5) |
| C(17)-C(18)-H(18) | 120.1    |
| C(19)-C(18)-H(18) | 120.1    |
| C(20)-C(19)-C(18) | 119.4(5) |
| C(20)-C(19)-H(19) | 120.3    |
| C(18)-C(19)-H(19) | 120.3    |
| C(15)-C(20)-C(19) | 120.9(5) |
| C(15)-C(20)-H(20) | 119.5    |
| C(19)-C(20)-H(20) | 119.5    |
| C(26)-C(21)-C(22) | 120.1(4) |
| C(26)-C(21)-P(2)  | 117.4(3) |
| C(22)-C(21)-P(2)  | 122.5(4) |
| C(23)-C(22)-C(21) | 119.1(5) |
| C(23)-C(22)-H(22) | 120.4    |

|                   |          |
|-------------------|----------|
| C(21)-C(22)-H(22) | 120.4    |
| C(24)-C(23)-C(22) | 121.2(5) |
| C(24)-C(23)-H(23) | 119.4    |
| C(22)-C(23)-H(23) | 119.4    |
| C(23)-C(24)-C(25) | 120.4(4) |
| C(23)-C(24)-H(24) | 119.8    |
| C(25)-C(24)-H(24) | 119.8    |
| C(26)-C(25)-C(24) | 118.7(5) |
| C(26)-C(25)-H(25) | 120.7    |
| C(24)-C(25)-H(25) | 120.7    |
| C(21)-C(26)-C(25) | 120.4(5) |
| C(21)-C(26)-H(26) | 119.8    |
| C(25)-C(26)-H(26) | 119.8    |
| C(36)-C(27)-C(28) | 120.9(4) |
| C(36)-C(27)-N(1)  | 120.1(3) |
| C(28)-C(27)-N(1)  | 118.9(3) |
| C(29)-C(28)-C(27) | 120.5(4) |
| C(29)-C(28)-H(28) | 119.7    |
| C(27)-C(28)-H(28) | 119.7    |
| C(28)-C(29)-C(30) | 121.0(4) |
| C(28)-C(29)-H(29) | 119.5    |
| C(30)-C(29)-H(29) | 119.5    |
| C(35)-C(30)-C(31) | 119.4(4) |
| C(35)-C(30)-C(29) | 118.9(4) |
| C(31)-C(30)-C(29) | 121.7(4) |
| C(32)-C(31)-C(30) | 121.4(4) |
| C(32)-C(31)-H(31) | 119.3    |
| C(30)-C(31)-H(31) | 119.3    |
| C(31)-C(32)-C(33) | 119.3(4) |
| C(31)-C(32)-H(32) | 120.4    |
| C(33)-C(32)-H(32) | 120.4    |
| C(34)-C(33)-C(32) | 121.0(4) |
| C(34)-C(33)-H(33) | 119.5    |
| C(32)-C(33)-H(33) | 119.5    |
| C(33)-C(34)-C(35) | 120.8(4) |
| C(33)-C(34)-H(34) | 119.6    |
| C(35)-C(34)-H(34) | 119.6    |
| C(30)-C(35)-C(34) | 118.0(4) |
| C(30)-C(35)-C(36) | 120.4(4) |
| C(34)-C(35)-C(36) | 121.7(4) |
| C(27)-C(36)-C(35) | 118.2(4) |
| C(27)-C(36)-C(37) | 120.0(3) |
| C(35)-C(36)-C(37) | 121.7(3) |
| C(46)-C(37)-C(38) | 118.5(3) |

|                   |          |
|-------------------|----------|
| C(46)–C(37)–C(36) | 120.0(3) |
| C(38)–C(37)–C(36) | 121.5(3) |
| C(39)–C(38)–C(43) | 117.8(4) |
| C(39)–C(38)–C(37) | 122.7(4) |
| C(43)–C(38)–C(37) | 119.5(4) |
| C(40)–C(39)–C(38) | 121.6(4) |
| C(40)–C(39)–H(39) | 119.2    |
| C(38)–C(39)–H(39) | 119.2    |
| C(39)–C(40)–C(41) | 120.4(4) |
| C(39)–C(40)–H(40) | 119.8    |
| C(41)–C(40)–H(40) | 119.8    |
| C(42)–C(41)–C(40) | 119.6(4) |
| C(42)–C(41)–H(41) | 120.2    |
| C(40)–C(41)–H(41) | 120.2    |
| C(41)–C(42)–C(43) | 121.3(4) |
| C(41)–C(42)–H(42) | 119.4    |
| C(43)–C(42)–H(42) | 119.4    |
| C(44)–C(43)–C(42) | 121.4(4) |
| C(44)–C(43)–C(38) | 119.3(4) |
| C(42)–C(43)–C(38) | 119.3(4) |
| C(45)–C(44)–C(43) | 121.2(4) |
| C(45)–C(44)–H(44) | 119.4    |
| C(43)–C(44)–H(44) | 119.4    |
| C(44)–C(45)–C(46) | 119.9(4) |
| C(44)–C(45)–H(45) | 120.0    |
| C(46)–C(45)–H(45) | 120.0    |
| C(37)–C(46)–C(45) | 121.6(4) |
| C(37)–C(46)–N(2)  | 121.4(3) |
| C(45)–C(46)–N(2)  | 117.0(4) |
| F(2)–C(47)–F(3)   | 108.6(4) |
| F(2)–C(47)–F(1)   | 108.0(4) |
| F(3)–C(47)–F(1)   | 107.9(4) |
| F(2)–C(47)–S(1)   | 111.9(3) |
| F(3)–C(47)–S(1)   | 111.3(3) |
| F(1)–C(47)–S(1)   | 109.0(3) |
| F(4)–C(48)–F(5)   | 107.7(4) |
| F(4)–C(48)–F(6)   | 107.3(4) |
| F(5)–C(48)–F(6)   | 107.0(4) |
| F(4)–C(48)–S(2)   | 111.6(3) |
| F(5)–C(48)–S(2)   | 112.2(3) |
| F(6)–C(48)–S(2)   | 110.8(3) |

---

Symmetry transformations used to generate equivalent atoms:

Table 4. Anisotropic displacement parameters ( $\text{Å}^2 \times 10^3$ ) for **5**.

The anisotropic displacement factor exponent takes the form:

$$-2 \pi^2 [ h^2 a^{*2} U_{11} + \dots + 2 h k a^* b^* U_{12} ]$$

|       | U11    | U22   | U33   | U23    | U13    | U12    |
|-------|--------|-------|-------|--------|--------|--------|
| Pd(1) | 25(1)  | 23(1) | 20(1) | -1(1)  | 0(1)   | 2(1)   |
| S(1)  | 29(1)  | 31(1) | 23(1) | -1(1)  | 2(1)   | 2(1)   |
| S(2)  | 28(1)  | 30(1) | 23(1) | -2(1)  | 1(1)   | 2(1)   |
| P(1)  | 26(1)  | 26(1) | 23(1) | -4(1)  | 1(1)   | 4(1)   |
| P(2)  | 32(1)  | 27(1) | 23(1) | -1(1)  | -3(1)  | 2(1)   |
| F(1)  | 46(2)  | 52(2) | 62(2) | 12(2)  | 28(2)  | 6(1)   |
| F(2)  | 59(2)  | 48(2) | 50(2) | 20(1)  | 12(2)  | 19(1)  |
| F(3)  | 51(2)  | 37(1) | 59(2) | -6(1)  | 7(2)   | -11(1) |
| F(4)  | 55(2)  | 82(2) | 34(2) | -13(2) | 18(2)  | 3(2)   |
| F(5)  | 55(2)  | 79(2) | 38(2) | -18(2) | -16(2) | 10(2)  |
| F(6)  | 113(3) | 39(2) | 47(2) | -17(1) | 18(2)  | -10(2) |
| O(1)  | 26(1)  | 37(2) | 32(2) | 4(1)   | 3(1)   | 6(1)   |
| O(2)  | 41(2)  | 52(2) | 25(2) | -12(1) | 2(1)   | 2(1)   |
| O(3)  | 34(2)  | 54(2) | 33(2) | 6(2)   | 3(1)   | 15(1)  |
| O(4)  | 37(2)  | 35(1) | 30(2) | 0(1)   | 8(1)   | -8(1)  |
| N(1)  | 26(2)  | 27(2) | 17(2) | -1(1)  | 0(1)   | 3(1)   |
| N(2)  | 29(2)  | 19(1) | 23(2) | -2(1)  | 5(2)   | 2(1)   |
| C(1)  | 30(2)  | 34(2) | 33(2) | 1(2)   | -7(2)  | 3(2)   |
| C(2)  | 27(2)  | 33(2) | 27(2) | -4(2)  | 1(2)   | 7(2)   |
| C(3)  | 30(2)  | 25(2) | 27(2) | 0(2)   | -1(2)  | 5(2)   |
| C(4)  | 32(2)  | 40(2) | 31(2) | -3(2)  | -3(2)  | 0(2)   |
| C(5)  | 41(2)  | 38(2) | 39(3) | -7(2)  | -9(2)  | -3(2)  |
| C(6)  | 68(3)  | 26(2) | 27(2) | -2(2)  | -10(3) | 4(2)   |
| C(7)  | 47(3)  | 44(2) | 32(2) | -3(2)  | 9(2)   | 9(2)   |
| C(8)  | 34(2)  | 39(2) | 32(2) | -7(2)  | 5(2)   | 2(2)   |
| C(9)  | 28(2)  | 32(2) | 26(2) | -1(2)  | -2(2)  | -1(2)  |
| C(10) | 39(2)  | 34(2) | 37(2) | 5(2)   | -2(2)  | 5(2)   |
| C(11) | 48(3)  | 41(2) | 44(3) | 10(2)  | -7(2)  | 0(2)   |
| C(12) | 51(3)  | 49(3) | 42(3) | 19(2)  | -6(2)  | -13(2) |
| C(13) | 28(2)  | 62(3) | 42(3) | 10(2)  | 3(2)   | -7(2)  |
| C(14) | 26(2)  | 39(2) | 36(2) | 0(2)   | -1(2)  | -2(2)  |
| C(15) | 48(3)  | 31(2) | 24(2) | -1(2)  | -5(2)  | 7(2)   |
| C(16) | 54(3)  | 49(3) | 31(3) | 9(2)   | 6(2)   | 11(2)  |
| C(17) | 75(4)  | 86(4) | 52(4) | 26(3)  | 29(3)  | 23(3)  |
| C(18) | 103(5) | 83(4) | 34(3) | 27(3)  | 21(3)  | 43(4)  |
| C(19) | 89(4)  | 53(3) | 30(3) | 8(2)   | -4(3)  | 31(3)  |
| C(20) | 58(3)  | 37(2) | 30(3) | 6(2)   | -3(2)  | 12(2)  |
| C(21) | 30(2)  | 30(2) | 33(2) | -5(2)  | -4(2)  | 5(2)   |

|        |        |        |        |         |         |         |
|--------|--------|--------|--------|---------|---------|---------|
| C (22) | 50 (3) | 34 (2) | 36 (3) | -5 (2)  | -8 (2)  | 7 (2)   |
| C (23) | 57 (3) | 38 (3) | 54 (3) | -14 (2) | -22 (3) | -2 (2)  |
| C (24) | 40 (3) | 35 (3) | 76 (4) | -9 (2)  | -15 (3) | -5 (2)  |
| C (25) | 40 (3) | 44 (3) | 62 (4) | -4 (2)  | 7 (3)   | -9 (2)  |
| C (26) | 45 (3) | 39 (2) | 45 (3) | -9 (2)  | 3 (2)   | -4 (2)  |
| C (27) | 27 (2) | 30 (2) | 18 (2) | 2 (2)   | -1 (2)  | 0 (2)   |
| C (28) | 35 (2) | 27 (2) | 27 (2) | -1 (2)  | -1 (2)  | -7 (2)  |
| C (29) | 33 (2) | 33 (2) | 24 (2) | 2 (2)   | -1 (2)  | -11 (2) |
| C (30) | 27 (2) | 34 (2) | 21 (2) | 4 (2)   | 2 (2)   | -2 (2)  |
| C (31) | 26 (2) | 54 (3) | 29 (2) | 6 (2)   | -2 (2)  | -4 (2)  |
| C (32) | 31 (2) | 62 (3) | 34 (3) | 13 (2)  | -2 (2)  | 9 (2)   |
| C (33) | 34 (2) | 40 (2) | 40 (3) | 7 (2)   | 7 (2)   | 14 (2)  |
| C (34) | 34 (2) | 34 (2) | 31 (2) | 0 (2)   | 0 (2)   | 7 (2)   |
| C (35) | 25 (2) | 31 (2) | 19 (2) | 2 (2)   | -4 (2)  | 2 (2)   |
| C (36) | 23 (2) | 26 (2) | 20 (2) | 4 (2)   | -1 (2)  | -1 (2)  |
| C (37) | 26 (2) | 22 (2) | 25 (2) | 0 (2)   | -1 (2)  | -3 (2)  |
| C (38) | 28 (2) | 24 (2) | 27 (2) | -1 (2)  | 4 (2)   | 3 (2)   |
| C (39) | 33 (2) | 30 (2) | 26 (2) | 2 (2)   | -1 (2)  | 1 (2)   |
| C (40) | 44 (3) | 36 (2) | 32 (2) | 4 (2)   | 3 (2)   | 2 (2)   |
| C (41) | 49 (3) | 30 (2) | 38 (3) | 5 (2)   | 6 (2)   | -3 (2)  |
| C (42) | 48 (3) | 26 (2) | 36 (3) | -4 (2)  | 1 (2)   | -3 (2)  |
| C (43) | 31 (2) | 27 (2) | 32 (2) | -4 (2)  | -1 (2)  | -2 (2)  |
| C (44) | 39 (2) | 30 (2) | 33 (3) | -6 (2)  | -4 (2)  | -9 (2)  |
| C (45) | 36 (2) | 32 (2) | 28 (2) | -2 (2)  | -4 (2)  | -1 (2)  |
| C (46) | 29 (2) | 21 (2) | 25 (2) | 0 (2)   | -1 (2)  | 1 (1)   |
| C (47) | 39 (2) | 39 (2) | 35 (3) | 6 (2)   | 13 (2)  | 4 (2)   |
| C (48) | 41 (3) | 38 (2) | 32 (3) | -4 (2)  | 5 (2)   | 5 (2)   |

---



Table 5. Hydrogen coordinates ( $\times 10^4$ ) and isotropic displacement parameters ( $\text{\AA}^2 \times 10^3$ ) for **5**.

|       | x     | y    | z     | U(eq) |
|-------|-------|------|-------|-------|
| H(1B) | 3216  | 2759 | 10731 | 39    |
| H(1A) | 2360  | 2035 | 10832 | 39    |
| H(2B) | 2873  | 1698 | 9887  | 35    |
| H(2A) | 2999  | 2763 | 9714  | 35    |
| H(4)  | -264  | 1755 | 9045  | 41    |
| H(5)  | -539  | 1002 | 8142  | 47    |
| H(6)  | 781   | 587  | 7545  | 48    |
| H(7)  | 2344  | 946  | 7841  | 49    |
| H(8)  | 2622  | 1751 | 8722  | 42    |
| H(10) | 1649  | 453  | 9890  | 44    |
| H(11) | 959   | -653 | 10513 | 53    |
| H(12) | -305  | -289 | 11143 | 57    |
| H(13) | -942  | 1197 | 11143 | 52    |
| H(14) | -273  | 2322 | 10525 | 41    |
| H(16) | -169  | 3386 | 11323 | 54    |
| H(17) | -700  | 2920 | 12253 | 85    |
| H(18) | 411   | 2484 | 12980 | 88    |
| H(19) | 2077  | 2582 | 12784 | 69    |
| H(20) | 2604  | 3021 | 11839 | 50    |
| H(22) | 2176  | 4838 | 11714 | 48    |
| H(23) | 3274  | 6039 | 11794 | 60    |
| H(24) | 4228  | 6455 | 10999 | 61    |
| H(25) | 4035  | 5728 | 10068 | 58    |
| H(26) | 2950  | 4496 | 9988  | 52    |
| H(28) | -653  | 3349 | 8398  | 36    |
| H(29) | -2150 | 3834 | 8076  | 36    |
| H(31) | -3427 | 5032 | 8028  | 44    |
| H(32) | -3971 | 6491 | 8250  | 51    |
| H(33) | -2983 | 7488 | 8804  | 45    |
| H(34) | -1495 | 7013 | 9154  | 40    |
| H(39) | -275  | 6796 | 8152  | 36    |
| H(40) | 304   | 8093 | 7691  | 45    |
| H(41) | 1465  | 9032 | 8170  | 47    |
| H(42) | 1995  | 8663 | 9115  | 44    |
| H(44) | 2022  | 7608 | 9971  | 41    |
| H(45) | 1455  | 6316 | 10449 | 38    |

Table 6. Torsion angles [deg] for **5**.

|                       |             |
|-----------------------|-------------|
| N(1)–Pd(1)–P(1)–C(3)  | –15.13(18)  |
| N(2)–Pd(1)–P(1)–C(3)  | 81.9(7)     |
| P(2)–Pd(1)–P(1)–C(3)  | –170.20(17) |
| N(1)–Pd(1)–P(1)–C(2)  | 113.38(17)  |
| N(2)–Pd(1)–P(1)–C(2)  | –149.6(7)   |
| P(2)–Pd(1)–P(1)–C(2)  | –41.69(15)  |
| N(1)–Pd(1)–P(1)–C(9)  | –135.69(16) |
| N(2)–Pd(1)–P(1)–C(9)  | –38.7(7)    |
| P(2)–Pd(1)–P(1)–C(9)  | 69.24(14)   |
| N(1)–Pd(1)–P(2)–C(15) | 168.7(3)    |
| N(2)–Pd(1)–P(2)–C(15) | 70.6(2)     |
| P(1)–Pd(1)–P(2)–C(15) | –101.91(18) |
| N(1)–Pd(1)–P(2)–C(21) | 41.8(2)     |
| N(2)–Pd(1)–P(2)–C(21) | –56.31(16)  |
| P(1)–Pd(1)–P(2)–C(21) | 131.20(14)  |
| N(1)–Pd(1)–P(2)–C(1)  | –68.7(2)    |
| N(2)–Pd(1)–P(2)–C(1)  | –166.88(16) |
| P(1)–Pd(1)–P(2)–C(1)  | 20.63(15)   |
| O(1)–S(1)–N(1)–C(27)  | –172.2(3)   |
| O(2)–S(1)–N(1)–C(27)  | –34.8(3)    |
| C(47)–S(1)–N(1)–C(27) | 78.3(3)     |
| O(1)–S(1)–N(1)–Pd(1)  | –2.9(2)     |
| O(2)–S(1)–N(1)–Pd(1)  | 134.52(19)  |
| C(47)–S(1)–N(1)–Pd(1) | –112.4(2)   |
| N(2)–Pd(1)–N(1)–C(27) | –50.4(3)    |
| P(1)–Pd(1)–N(1)–C(27) | 121.9(3)    |
| P(2)–Pd(1)–N(1)–C(27) | –152.0(2)   |
| N(2)–Pd(1)–N(1)–S(1)  | 140.36(19)  |
| P(1)–Pd(1)–N(1)–S(1)  | –47.40(18)  |
| P(2)–Pd(1)–N(1)–S(1)  | 38.7(3)     |
| O(3)–S(2)–N(2)–C(46)  | 31.3(4)     |
| O(4)–S(2)–N(2)–C(46)  | 168.0(3)    |
| C(48)–S(2)–N(2)–C(46) | –81.6(3)    |
| O(3)–S(2)–N(2)–Pd(1)  | –130.2(2)   |
| O(4)–S(2)–N(2)–Pd(1)  | 6.6(3)      |
| C(48)–S(2)–N(2)–Pd(1) | 116.9(2)    |
| N(1)–Pd(1)–N(2)–C(46) | –43.3(3)    |
| P(1)–Pd(1)–N(2)–C(46) | –141.2(6)   |
| P(2)–Pd(1)–N(2)–C(46) | 112.1(3)    |
| N(1)–Pd(1)–N(2)–S(2)  | 118.0(2)    |
| P(1)–Pd(1)–N(2)–S(2)  | 20.1(9)     |
| P(2)–Pd(1)–N(2)–S(2)  | –86.6(2)    |

|                             |            |
|-----------------------------|------------|
| C (15)–P (2)–C (1)–C (2)    | 147.3 (3)  |
| C (21)–P (2)–C (1)–C (2)    | –102.1 (3) |
| Pd (1)–P (2)–C (1)–C (2)    | 8.8 (3)    |
| P (2)–C (1)–C (2)–P (1)     | –41.4 (3)  |
| C (3)–P (1)–C (2)–C (1)     | –167.5 (3) |
| C (9)–P (1)–C (2)–C (1)     | –60.1 (3)  |
| Pd (1)–P (1)–C (2)–C (1)    | 57.5 (3)   |
| C (2)–P (1)–C (3)–C (4)     | 163.6 (3)  |
| C (9)–P (1)–C (3)–C (4)     | 54.8 (4)   |
| Pd (1)–P (1)–C (3)–C (4)    | –71.2 (4)  |
| C (2)–P (1)–C (3)–C (8)     | –11.0 (4)  |
| C (9)–P (1)–C (3)–C (8)     | –119.8 (4) |
| Pd (1)–P (1)–C (3)–C (8)    | 114.2 (3)  |
| C (8)–C (3)–C (4)–C (5)     | –1.2 (7)   |
| P (1)–C (3)–C (4)–C (5)     | –176.0 (3) |
| C (3)–C (4)–C (5)–C (6)     | 1.6 (7)    |
| C (4)–C (5)–C (6)–C (7)     | –0.6 (7)   |
| C (5)–C (6)–C (7)–C (8)     | –0.8 (7)   |
| C (6)–C (7)–C (8)–C (3)     | 1.2 (7)    |
| C (4)–C (3)–C (8)–C (7)     | –0.2 (6)   |
| P (1)–C (3)–C (8)–C (7)     | 174.3 (3)  |
| C (3)–P (1)–C (9)–C (14)    | –122.1 (4) |
| C (2)–P (1)–C (9)–C (14)    | 122.2 (4)  |
| Pd (1)–P (1)–C (9)–C (14)   | 10.5 (4)   |
| C (3)–P (1)–C (9)–C (10)    | 58.3 (4)   |
| C (2)–P (1)–C (9)–C (10)    | –57.3 (4)  |
| Pd (1)–P (1)–C (9)–C (10)   | –169.0 (3) |
| C (14)–C (9)–C (10)–C (11)  | –1.7 (6)   |
| P (1)–C (9)–C (10)–C (11)   | 177.8 (3)  |
| C (9)–C (10)–C (11)–C (12)  | 0.3 (7)    |
| C (10)–C (11)–C (12)–C (13) | 1.1 (7)    |
| C (11)–C (12)–C (13)–C (14) | –1.0 (7)   |
| C (10)–C (9)–C (14)–C (13)  | 1.7 (6)    |
| P (1)–C (9)–C (14)–C (13)   | –177.7 (3) |
| C (12)–C (13)–C (14)–C (9)  | –0.4 (7)   |
| C (21)–P (2)–C (15)–C (20)  | –61.6 (4)  |
| C (1)–P (2)–C (15)–C (20)   | 47.5 (4)   |
| Pd (1)–P (2)–C (15)–C (20)  | 172.0 (3)  |
| C (21)–P (2)–C (15)–C (16)  | 121.7 (4)  |
| C (1)–P (2)–C (15)–C (16)   | –129.2 (4) |
| Pd (1)–P (2)–C (15)–C (16)  | –4.7 (5)   |
| C (20)–C (15)–C (16)–C (17) | –0.8 (8)   |
| P (2)–C (15)–C (16)–C (17)  | 175.9 (4)  |
| C (15)–C (16)–C (17)–C (18) | 0.1 (9)    |

|                             |            |
|-----------------------------|------------|
| C (16)–C (17)–C (18)–C (19) | 1.4 (10)   |
| C (17)–C (18)–C (19)–C (20) | –2.1 (9)   |
| C (16)–C (15)–C (20)–C (19) | 0.0 (7)    |
| P (2)–C (15)–C (20)–C (19)  | –176.8 (4) |
| C (18)–C (19)–C (20)–C (15) | 1.4 (8)    |
| C (15)–P (2)–C (21)–C (26)  | 170.6 (3)  |
| C (1)–P (2)–C (21)–C (26)   | 63.2 (4)   |
| Pd (1)–P (2)–C (21)–C (26)  | –49.2 (4)  |
| C (15)–P (2)–C (21)–C (22)  | –7.9 (4)   |
| C (1)–P (2)–C (21)–C (22)   | –115.3 (4) |
| Pd (1)–P (2)–C (21)–C (22)  | 132.3 (3)  |
| C (26)–C (21)–C (22)–C (23) | –2.7 (7)   |
| P (2)–C (21)–C (22)–C (23)  | 175.8 (3)  |
| C (21)–C (22)–C (23)–C (24) | 0.6 (7)    |
| C (22)–C (23)–C (24)–C (25) | 2.2 (8)    |
| C (23)–C (24)–C (25)–C (26) | –2.8 (8)   |
| C (22)–C (21)–C (26)–C (25) | 2.0 (7)    |
| P (2)–C (21)–C (26)–C (25)  | –176.5 (4) |
| C (24)–C (25)–C (26)–C (21) | 0.7 (7)    |
| S (1)–N (1)–C (27)–C (36)   | –112.4 (4) |
| Pd (1)–N (1)–C (27)–C (36)  | 78.4 (4)   |
| S (1)–N (1)–C (27)–C (28)   | 71.0 (4)   |
| Pd (1)–N (1)–C (27)–C (28)  | –98.2 (4)  |
| C (36)–C (27)–C (28)–C (29) | 1.4 (6)    |
| N (1)–C (27)–C (28)–C (29)  | 178.0 (4)  |
| C (27)–C (28)–C (29)–C (30) | –2.6 (6)   |
| C (28)–C (29)–C (30)–C (35) | 0.9 (6)    |
| C (28)–C (29)–C (30)–C (31) | –179.9 (4) |
| C (35)–C (30)–C (31)–C (32) | –0.7 (6)   |
| C (29)–C (30)–C (31)–C (32) | –179.8 (4) |
| C (30)–C (31)–C (32)–C (33) | –0.7 (7)   |
| C (31)–C (32)–C (33)–C (34) | –0.5 (7)   |
| C (32)–C (33)–C (34)–C (35) | 3.3 (7)    |
| C (31)–C (30)–C (35)–C (34) | 3.4 (6)    |
| C (29)–C (30)–C (35)–C (34) | –177.5 (4) |
| C (31)–C (30)–C (35)–C (36) | –177.3 (4) |
| C (29)–C (30)–C (35)–C (36) | 1.8 (6)    |
| C (33)–C (34)–C (35)–C (30) | –4.7 (6)   |
| C (33)–C (34)–C (35)–C (36) | 176.0 (4)  |
| C (28)–C (27)–C (36)–C (35) | 1.3 (6)    |
| N (1)–C (27)–C (36)–C (35)  | –175.3 (3) |
| C (28)–C (27)–C (36)–C (37) | –176.3 (4) |
| N (1)–C (27)–C (36)–C (37)  | 7.2 (6)    |
| C (30)–C (35)–C (36)–C (27) | –2.9 (6)   |

|                             |            |
|-----------------------------|------------|
| C (34)–C (35)–C (36)–C (27) | 176.4 (4)  |
| C (30)–C (35)–C (36)–C (37) | 174.6 (4)  |
| C (34)–C (35)–C (36)–C (37) | –6.1 (6)   |
| C (27)–C (36)–C (37)–C (46) | –62.9 (5)  |
| C (35)–C (36)–C (37)–C (46) | 119.6 (4)  |
| C (27)–C (36)–C (37)–C (38) | 114.2 (4)  |
| C (35)–C (36)–C (37)–C (38) | –63.3 (5)  |
| C (46)–C (37)–C (38)–C (39) | 179.9 (4)  |
| C (36)–C (37)–C (38)–C (39) | 2.7 (6)    |
| C (46)–C (37)–C (38)–C (43) | 0.3 (5)    |
| C (36)–C (37)–C (38)–C (43) | –176.8 (3) |
| C (43)–C (38)–C (39)–C (40) | 0.0 (6)    |
| C (37)–C (38)–C (39)–C (40) | –179.6 (4) |
| C (38)–C (39)–C (40)–C (41) | 0.2 (6)    |
| C (39)–C (40)–C (41)–C (42) | –0.7 (7)   |
| C (40)–C (41)–C (42)–C (43) | 0.9 (7)    |
| C (41)–C (42)–C (43)–C (44) | 177.9 (4)  |
| C (41)–C (42)–C (43)–C (38) | –0.8 (6)   |
| C (39)–C (38)–C (43)–C (44) | –178.4 (4) |
| C (37)–C (38)–C (43)–C (44) | 1.2 (6)    |
| C (39)–C (38)–C (43)–C (42) | 0.3 (6)    |
| C (37)–C (38)–C (43)–C (42) | 179.9 (4)  |
| C (42)–C (43)–C (44)–C (45) | 179.8 (4)  |
| C (38)–C (43)–C (44)–C (45) | –1.5 (6)   |
| C (43)–C (44)–C (45)–C (46) | 0.4 (6)    |
| C (38)–C (37)–C (46)–C (45) | –1.5 (6)   |
| C (36)–C (37)–C (46)–C (45) | 175.7 (3)  |
| C (38)–C (37)–C (46)–N (2)  | –178.8 (3) |
| C (36)–C (37)–C (46)–N (2)  | –1.6 (5)   |
| C (44)–C (45)–C (46)–C (37) | 1.1 (6)    |
| C (44)–C (45)–C (46)–N (2)  | 178.6 (3)  |
| S (2)–N (2)–C (46)–C (37)   | –81.3 (4)  |
| Pd (1)–N (2)–C (46)–C (37)  | 80.2 (4)   |
| S (2)–N (2)–C (46)–C (45)   | 101.2 (4)  |
| Pd (1)–N (2)–C (46)–C (45)  | –97.3 (4)  |
| O (1)–S (1)–C (47)–F (2)    | 176.8 (3)  |
| O (2)–S (1)–C (47)–F (2)    | 53.1 (4)   |
| N (1)–S (1)–C (47)–F (2)    | –68.4 (4)  |
| O (1)–S (1)–C (47)–F (3)    | –61.5 (3)  |
| O (2)–S (1)–C (47)–F (3)    | 174.8 (3)  |
| N (1)–S (1)–C (47)–F (3)    | 53.3 (4)   |
| O (1)–S (1)–C (47)–F (1)    | 57.4 (4)   |
| O (2)–S (1)–C (47)–F (1)    | –66.3 (4)  |
| N (1)–S (1)–C (47)–F (1)    | 172.2 (3)  |

|                      |           |
|----------------------|-----------|
| O(3)-S(2)-C(48)-F(4) | 67.0(4)   |
| O(4)-S(2)-C(48)-F(4) | -56.0(4)  |
| N(2)-S(2)-C(48)-F(4) | -170.9(3) |
| O(3)-S(2)-C(48)-F(5) | -172.1(3) |
| O(4)-S(2)-C(48)-F(5) | 64.9(4)   |
| N(2)-S(2)-C(48)-F(5) | -50.0(4)  |
| O(3)-S(2)-C(48)-F(6) | -52.5(4)  |
| O(4)-S(2)-C(48)-F(6) | -175.5(3) |
| N(2)-S(2)-C(48)-F(6) | 69.6(4)   |

---

Symmetry transformations used to generate equivalent atoms:

Table 7. Hydrogen bonds for **5** [A and deg.].

---

| D-H...A | d(D-H) | d(H...A) | d(D...A) | <(DHA) |
|---------|--------|----------|----------|--------|
|---------|--------|----------|----------|--------|

### The X-ray structure of compound 6a

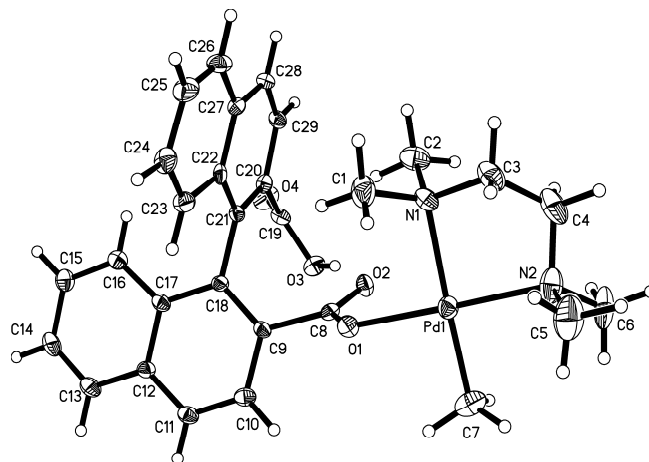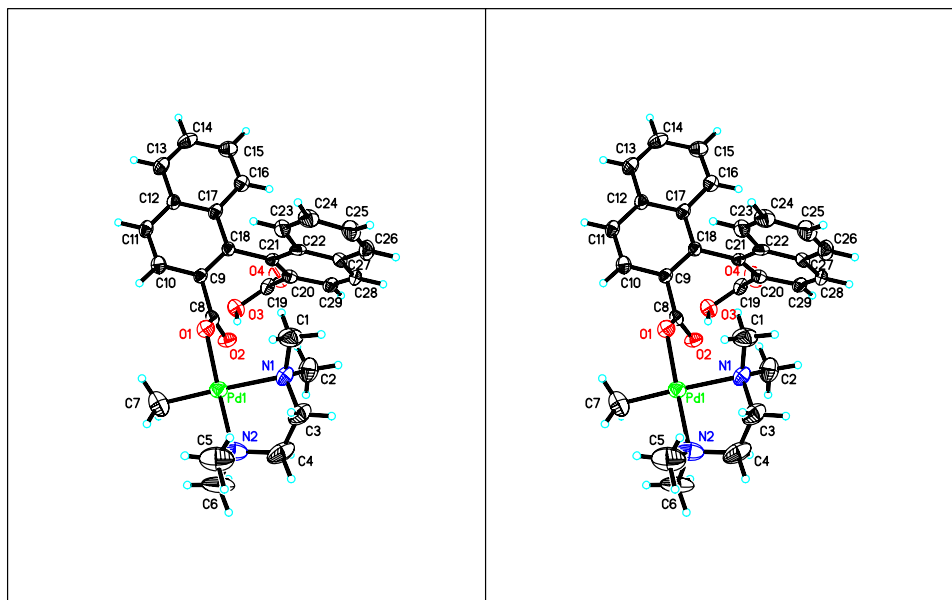

Table 1. Crystal data and structure refinement for **6a**.

|                                   |                                                                                                                       |
|-----------------------------------|-----------------------------------------------------------------------------------------------------------------------|
| Identification code               | a                                                                                                                     |
| Empirical formula                 | C <sub>29</sub> H <sub>32</sub> N <sub>2</sub> O <sub>4</sub> Pd                                                      |
| Formula weight                    | 578.97                                                                                                                |
| Temperature                       | 173(2) K                                                                                                              |
| Wavelength                        | 0.71073 Å                                                                                                             |
| Crystal system, space group       | Monoclinic, P2(1)                                                                                                     |
| Unit cell dimensions              | a = 9.5931(19) Å    alpha = 90 deg.<br>b = 12.862(3) Å    beta = 113.40(3) deg.<br>c = 11.787(2) Å    gamma = 90 deg. |
| Volume                            | 1334.8(5) Å <sup>3</sup>                                                                                              |
| Z, Calculated density             | 2, 1.441 Mg/m <sup>3</sup>                                                                                            |
| Absorption coefficient            | 0.732 mm <sup>-1</sup>                                                                                                |
| F(000)                            | 596                                                                                                                   |
| Crystal size                      | 0.17 x 0.15 x 0.10 mm                                                                                                 |
| Theta range for data collection   | 1.88 to 27.47 deg.                                                                                                    |
| Limiting indices                  | -12<=h<=12, -16<=k<=16, -15<=l<=15                                                                                    |
| Reflections collected / unique    | 9952 / 5613 [R(int) = 0.0439]                                                                                         |
| Completeness to theta = 27.47     | 99.6 %                                                                                                                |
| Absorption correction             | Semi-empirical from equivalents                                                                                       |
| Max. and min. transmission        | 1.0000 and 0.7825                                                                                                     |
| Refinement method                 | Full-matrix least-squares on F <sup>2</sup>                                                                           |
| Data / restraints / parameters    | 5613 / 1 / 330                                                                                                        |
| Goodness-of-fit on F <sup>2</sup> | 1.102                                                                                                                 |
| Final R indices [I>2sigma(I)]     | R1 = 0.0510, wR2 = 0.0900                                                                                             |
| R indices (all data)              | R1 = 0.0567, wR2 = 0.0933                                                                                             |
| Absolute structure parameter      | 0.03(3)                                                                                                               |
| Largest diff. peak and hole       | 0.650 and -0.547 e.Å <sup>-3</sup>                                                                                    |



Table 2. Atomic coordinates ( $\times 10^4$ ) and equivalent isotropic displacement parameters ( $\text{Å}^2 \times 10^3$ ) for **6a**.  
U(eq) is defined as one third of the trace of the orthogonalized Uij tensor.

|       | x        | y        | z        | U(eq) |
|-------|----------|----------|----------|-------|
| Pd(1) | 6069(1)  | 979(1)   | 1510(1)  | 31(1) |
| O(1)  | 6725(4)  | 208(3)   | 3171(3)  | 31(1) |
| O(2)  | 6276(4)  | 1597(3)  | 4103(4)  | 31(1) |
| O(3)  | 6340(3)  | 2280(3)  | 6156(3)  | 32(1) |
| O(4)  | 7896(5)  | 3051(4)  | 7844(4)  | 45(1) |
| N(1)  | 8341(5)  | 1623(3)  | 1948(4)  | 34(1) |
| N(2)  | 5527(6)  | 1708(5)  | -191(4)  | 52(1) |
| C(1)  | 9554(6)  | 849(7)   | 2462(5)  | 51(2) |
| C(2)  | 8658(7)  | 2477(4)  | 2844(6)  | 49(2) |
| C(3)  | 8276(7)  | 1992(5)  | 753(6)   | 51(2) |
| C(4)  | 6790(8)  | 2464(5)  | 30(6)    | 59(2) |
| C(5)  | 5530(7)  | 922(10)  | -1111(5) | 74(2) |
| C(6)  | 4087(7)  | 2288(6)  | -679(6)  | 70(2) |
| C(7)  | 3953(6)  | 405(5)   | 1054(6)  | 56(2) |
| C(8)  | 6664(5)  | 671(4)   | 4095(5)  | 25(1) |
| C(9)  | 7076(5)  | 46(3)    | 5251(4)  | 22(1) |
| C(10) | 6154(5)  | -835(4)  | 5221(5)  | 29(1) |
| C(11) | 6374(5)  | -1363(4) | 6282(5)  | 27(1) |
| C(12) | 7519(6)  | -1068(4) | 7424(5)  | 25(1) |
| C(13) | 7752(6)  | -1594(4) | 8535(5)  | 32(1) |
| C(14) | 8892(6)  | -1329(4) | 9611(5)  | 38(1) |
| C(15) | 9893(6)  | -510(4)  | 9645(5)  | 33(1) |
| C(16) | 9693(5)  | 39(4)    | 8607(4)  | 28(1) |
| C(17) | 8509(5)  | -214(4)  | 7455(5)  | 24(1) |
| C(18) | 8244(5)  | 343(3)   | 6345(4)  | 22(1) |
| C(19) | 7722(6)  | 2546(4)  | 6946(5)  | 28(1) |
| C(20) | 9035(5)  | 2226(4)  | 6631(4)  | 24(1) |
| C(21) | 9263(5)  | 1228(3)  | 6346(4)  | 22(1) |
| C(22) | 10582(4) | 1022(6)  | 6085(3)  | 23(1) |
| C(23) | 10961(6) | -17(4)   | 5843(5)  | 30(1) |
| C(24) | 12218(6) | -190(5)  | 5609(5)  | 36(1) |
| C(25) | 13118(6) | 633(5)   | 5544(6)  | 41(2) |
| C(26) | 12833(6) | 1608(5)  | 5786(5)  | 35(1) |
| C(27) | 11547(5) | 1830(4)  | 6059(5)  | 25(1) |
| C(28) | 11248(5) | 2846(4)  | 6368(4)  | 30(1) |
| C(29) | 10034(5) | 3035(4)  | 6660(4)  | 27(1) |

Table 3. Bond lengths [Å] and angles [deg] for **6a**.

---

|             |           |
|-------------|-----------|
| Pd(1)–C(7)  | 2.022(6)  |
| Pd(1)–O(1)  | 2.057(3)  |
| Pd(1)–N(2)  | 2.084(5)  |
| Pd(1)–N(1)  | 2.193(4)  |
| O(1)–C(8)   | 1.262(6)  |
| O(2)–C(8)   | 1.249(6)  |
| O(3)–C(19)  | 1.327(6)  |
| O(3)–H(3)   | 0.8400    |
| O(4)–C(19)  | 1.195(6)  |
| N(1)–C(3)   | 1.464(7)  |
| N(1)–C(1)   | 1.467(7)  |
| N(1)–C(2)   | 1.470(7)  |
| N(2)–C(6)   | 1.471(7)  |
| N(2)–C(5)   | 1.483(10) |
| N(2)–C(4)   | 1.494(8)  |
| C(1)–H(1B)  | 0.9800    |
| C(1)–H(1C)  | 0.9800    |
| C(1)–H(1A)  | 0.9800    |
| C(2)–H(2A)  | 0.9800    |
| C(2)–H(2C)  | 0.9800    |
| C(2)–H(2B)  | 0.9800    |
| C(3)–C(4)   | 1.470(8)  |
| C(3)–H(3A)  | 0.9900    |
| C(3)–H(3B)  | 0.9900    |
| C(4)–H(4B)  | 0.9900    |
| C(4)–H(4A)  | 0.9900    |
| C(5)–H(5A)  | 0.9800    |
| C(5)–H(5C)  | 0.9800    |
| C(5)–H(5B)  | 0.9800    |
| C(6)–H(6A)  | 0.9800    |
| C(6)–H(6C)  | 0.9800    |
| C(6)–H(6B)  | 0.9800    |
| C(7)–H(7A)  | 0.9800    |
| C(7)–H(7C)  | 0.9800    |
| C(7)–H(7B)  | 0.9800    |
| C(8)–C(9)   | 1.494(7)  |
| C(9)–C(18)  | 1.384(6)  |
| C(9)–C(10)  | 1.430(6)  |
| C(10)–C(11) | 1.364(7)  |
| C(10)–H(10) | 0.9500    |
| C(11)–C(12) | 1.410(7)  |
| C(11)–H(11) | 0.9500    |

|                    |              |
|--------------------|--------------|
| C (12)–C (13)      | 1. 410 (8)   |
| C (12)–C (17)      | 1. 444 (7)   |
| C (13)–C (14)      | 1. 349 (7)   |
| C (13)–H (13)      | 0. 9500      |
| C (14)–C (15)      | 1. 415 (7)   |
| C (14)–H (14)      | 0. 9500      |
| C (15)–C (16)      | 1. 359 (7)   |
| C (15)–H (15)      | 0. 9500      |
| C (16)–C (17)      | 1. 420 (7)   |
| C (16)–H (16)      | 0. 9500      |
| C (17)–C (18)      | 1. 423 (7)   |
| C (18)–C (21)      | 1. 500 (6)   |
| C (19)–C (20)      | 1. 505 (6)   |
| C (20)–C (21)      | 1. 366 (6)   |
| C (20)–C (29)      | 1. 406 (6)   |
| C (21)–C (22)      | 1. 440 (5)   |
| C (22)–C (27)      | 1. 400 (8)   |
| C (22)–C (23)      | 1. 443 (9)   |
| C (23)–C (24)      | 1. 357 (7)   |
| C (23)–H (23)      | 0. 9500      |
| C (24)–C (25)      | 1. 387 (7)   |
| C (24)–H (24)      | 0. 9500      |
| C (25)–C (26)      | 1. 339 (8)   |
| C (25)–H (25)      | 0. 9500      |
| C (26)–C (27)      | 1. 422 (7)   |
| C (26)–H (26)      | 0. 9500      |
| C (27)–C (28)      | 1. 417 (7)   |
| C (28)–C (29)      | 1. 361 (7)   |
| C (28)–H (28)      | 0. 9500      |
| C (29)–H (29)      | 0. 9500      |
|                    |              |
| C (7)–Pd (1)–O (1) | 88. 4 (2)    |
| C (7)–Pd (1)–N (2) | 93. 9 (2)    |
| O (1)–Pd (1)–N (2) | 176. 06 (18) |
| C (7)–Pd (1)–N (1) | 178. 2 (2)   |
| O (1)–Pd (1)–N (1) | 93. 37 (15)  |
| N (2)–Pd (1)–N (1) | 84. 33 (19)  |
| C (8)–O (1)–Pd (1) | 119. 5 (3)   |
| C (19)–O (3)–H (3) | 108. 9       |
| C (3)–N (1)–C (1)  | 110. 0 (4)   |
| C (3)–N (1)–C (2)  | 111. 5 (5)   |
| C (1)–N (1)–C (2)  | 107. 8 (5)   |
| C (3)–N (1)–Pd (1) | 103. 7 (3)   |
| C (1)–N (1)–Pd (1) | 113. 1 (4)   |

|                  |          |
|------------------|----------|
| C (2)–N(1)–Pd(1) | 110.7(3) |
| C (6)–N(2)–C(5)  | 109.5(5) |
| C (6)–N(2)–C(4)  | 107.9(6) |
| C (5)–N(2)–C(4)  | 109.5(5) |
| C (6)–N(2)–Pd(1) | 116.2(4) |
| C (5)–N(2)–Pd(1) | 108.9(5) |
| C (4)–N(2)–Pd(1) | 104.5(4) |
| N(1)–C(1)–H(1B)  | 109.5    |
| N(1)–C(1)–H(1C)  | 109.5    |
| H(1B)–C(1)–H(1C) | 109.5    |
| N(1)–C(1)–H(1A)  | 109.5    |
| H(1B)–C(1)–H(1A) | 109.5    |
| H(1C)–C(1)–H(1A) | 109.5    |
| N(1)–C(2)–H(2A)  | 109.5    |
| N(1)–C(2)–H(2C)  | 109.5    |
| H(2A)–C(2)–H(2C) | 109.5    |
| N(1)–C(2)–H(2B)  | 109.5    |
| H(2A)–C(2)–H(2B) | 109.5    |
| H(2C)–C(2)–H(2B) | 109.5    |
| N(1)–C(3)–C(4)   | 110.7(5) |
| N(1)–C(3)–H(3A)  | 109.5    |
| C(4)–C(3)–H(3A)  | 109.5    |
| N(1)–C(3)–H(3B)  | 109.5    |
| C(4)–C(3)–H(3B)  | 109.5    |
| H(3A)–C(3)–H(3B) | 108.1    |
| C(3)–C(4)–N(2)   | 111.4(5) |
| C(3)–C(4)–H(4B)  | 109.4    |
| N(2)–C(4)–H(4B)  | 109.4    |
| C(3)–C(4)–H(4A)  | 109.4    |
| N(2)–C(4)–H(4A)  | 109.4    |
| H(4B)–C(4)–H(4A) | 108.0    |
| N(2)–C(5)–H(5A)  | 109.5    |
| N(2)–C(5)–H(5C)  | 109.5    |
| H(5A)–C(5)–H(5C) | 109.5    |
| N(2)–C(5)–H(5B)  | 109.5    |
| H(5A)–C(5)–H(5B) | 109.5    |
| H(5C)–C(5)–H(5B) | 109.5    |
| N(2)–C(6)–H(6A)  | 109.5    |
| N(2)–C(6)–H(6C)  | 109.5    |
| H(6A)–C(6)–H(6C) | 109.5    |
| N(2)–C(6)–H(6B)  | 109.5    |
| H(6A)–C(6)–H(6B) | 109.5    |
| H(6C)–C(6)–H(6B) | 109.5    |
| Pd(1)–C(7)–H(7A) | 109.5    |

|                   |          |
|-------------------|----------|
| Pd(1)-C(7)-H(7C)  | 109.5    |
| H(7A)-C(7)-H(7C)  | 109.5    |
| Pd(1)-C(7)-H(7B)  | 109.5    |
| H(7A)-C(7)-H(7B)  | 109.5    |
| H(7C)-C(7)-H(7B)  | 109.5    |
| O(2)-C(8)-O(1)    | 124.9(6) |
| O(2)-C(8)-C(9)    | 118.5(6) |
| O(1)-C(8)-C(9)    | 116.6(4) |
| C(18)-C(9)-C(10)  | 120.4(4) |
| C(18)-C(9)-C(8)   | 121.6(4) |
| C(10)-C(9)-C(8)   | 117.8(4) |
| C(11)-C(10)-C(9)  | 120.2(5) |
| C(11)-C(10)-H(10) | 119.9    |
| C(9)-C(10)-H(10)  | 119.9    |
| C(10)-C(11)-C(12) | 121.3(5) |
| C(10)-C(11)-H(11) | 119.3    |
| C(12)-C(11)-H(11) | 119.3    |
| C(11)-C(12)-C(13) | 122.3(5) |
| C(11)-C(12)-C(17) | 118.9(5) |
| C(13)-C(12)-C(17) | 118.8(5) |
| C(14)-C(13)-C(12) | 121.5(5) |
| C(14)-C(13)-H(13) | 119.2    |
| C(12)-C(13)-H(13) | 119.2    |
| C(13)-C(14)-C(15) | 120.1(5) |
| C(13)-C(14)-H(14) | 119.9    |
| C(15)-C(14)-H(14) | 119.9    |
| C(16)-C(15)-C(14) | 120.6(5) |
| C(16)-C(15)-H(15) | 119.7    |
| C(14)-C(15)-H(15) | 119.7    |
| C(15)-C(16)-C(17) | 121.1(5) |
| C(15)-C(16)-H(16) | 119.5    |
| C(17)-C(16)-H(16) | 119.5    |
| C(16)-C(17)-C(18) | 123.2(4) |
| C(16)-C(17)-C(12) | 117.8(4) |
| C(18)-C(17)-C(12) | 119.0(4) |
| C(9)-C(18)-C(17)  | 120.0(4) |
| C(9)-C(18)-C(21)  | 119.8(4) |
| C(17)-C(18)-C(21) | 120.2(4) |
| O(4)-C(19)-O(3)   | 120.8(5) |
| O(4)-C(19)-C(20)  | 122.0(5) |
| O(3)-C(19)-C(20)  | 117.2(4) |
| C(21)-C(20)-C(29) | 121.8(4) |
| C(21)-C(20)-C(19) | 123.3(4) |
| C(29)-C(20)-C(19) | 114.9(4) |

|                      |           |
|----------------------|-----------|
| C (20)–C (21)–C (22) | 117.8 (5) |
| C (20)–C (21)–C (18) | 123.0 (4) |
| C (22)–C (21)–C (18) | 119.2 (4) |
| C (27)–C (22)–C (21) | 120.8 (6) |
| C (27)–C (22)–C (23) | 117.5 (4) |
| C (21)–C (22)–C (23) | 121.6 (5) |
| C (24)–C (23)–C (22) | 120.4 (5) |
| C (24)–C (23)–H (23) | 119.8     |
| C (22)–C (23)–H (23) | 119.8     |
| C (23)–C (24)–C (25) | 120.5 (6) |
| C (23)–C (24)–H (24) | 119.7     |
| C (25)–C (24)–H (24) | 119.7     |
| C (26)–C (25)–C (24) | 121.3 (5) |
| C (26)–C (25)–H (25) | 119.4     |
| C (24)–C (25)–H (25) | 119.4     |
| C (25)–C (26)–C (27) | 120.3 (5) |
| C (25)–C (26)–H (26) | 119.8     |
| C (27)–C (26)–H (26) | 119.8     |
| C (22)–C (27)–C (28) | 118.4 (5) |
| C (22)–C (27)–C (26) | 119.8 (5) |
| C (28)–C (27)–C (26) | 121.7 (5) |
| C (29)–C (28)–C (27) | 120.7 (4) |
| C (29)–C (28)–H (28) | 119.7     |
| C (27)–C (28)–H (28) | 119.7     |
| C (28)–C (29)–C (20) | 120.4 (4) |
| C (28)–C (29)–H (29) | 119.8     |
| C (20)–C (29)–H (29) | 119.8     |

---

Symmetry transformations used to generate equivalent atoms:

Table 4. Anisotropic displacement parameters ( $\text{Å}^2 \times 10^3$ ) for **6a**.

The anisotropic displacement factor exponent takes the form:

$$-2 \pi^2 [ h^2 a^*^2 U_{11} + \dots + 2 h k a^* b^* U_{12} ]$$

|       | U11    | U22    | U33   | U23    | U13   | U12   |
|-------|--------|--------|-------|--------|-------|-------|
| Pd(1) | 35(1)  | 32(1)  | 23(1) | 0(1)   | 11(1) | -1(1) |
| O(1)  | 36(2)  | 29(2)  | 29(2) | -1(2)  | 14(2) | 0(2)  |
| O(2)  | 39(2)  | 24(2)  | 28(2) | 4(2)   | 11(2) | 6(2)  |
| O(3)  | 25(2)  | 37(2)  | 37(2) | -6(2)  | 15(2) | 4(2)  |
| O(4)  | 40(2)  | 57(3)  | 42(3) | -15(2) | 19(2) | -1(2) |
| N(1)  | 40(2)  | 31(2)  | 38(3) | 4(2)   | 22(2) | -3(2) |
| N(2)  | 57(3)  | 69(4)  | 31(3) | 7(3)   | 20(2) | 21(3) |
| C(1)  | 40(3)  | 58(5)  | 55(3) | 19(4)  | 20(2) | 18(4) |
| C(2)  | 54(4)  | 37(3)  | 62(4) | -9(3)  | 29(3) | -7(3) |
| C(3)  | 56(4)  | 49(4)  | 59(4) | 18(3)  | 36(3) | 6(3)  |
| C(4)  | 78(5)  | 57(4)  | 61(4) | 24(4)  | 50(4) | 16(4) |
| C(5)  | 100(5) | 83(5)  | 39(3) | -3(6)  | 28(3) | 22(7) |
| C(6)  | 61(4)  | 102(6) | 45(4) | 35(4)  | 18(3) | 42(4) |
| C(7)  | 40(3)  | 60(4)  | 60(4) | -13(3) | 12(3) | -7(3) |
| C(8)  | 17(2)  | 28(3)  | 27(3) | -1(2)  | 7(2)  | -3(2) |
| C(9)  | 22(2)  | 18(2)  | 27(3) | 2(2)   | 12(2) | 1(2)  |
| C(10) | 29(2)  | 27(3)  | 31(3) | -6(2)  | 14(2) | -3(2) |
| C(11) | 26(2)  | 25(3)  | 36(3) | 0(2)   | 18(2) | -2(2) |
| C(12) | 22(2)  | 25(3)  | 29(3) | 1(2)   | 11(2) | -2(2) |
| C(13) | 38(3)  | 31(3)  | 35(3) | 5(2)   | 23(2) | -3(2) |
| C(14) | 49(3)  | 36(3)  | 34(3) | 13(3)  | 22(3) | 5(3)  |
| C(15) | 38(3)  | 37(3)  | 27(3) | 3(2)   | 15(2) | 4(2)  |
| C(16) | 29(2)  | 29(3)  | 29(3) | 0(2)   | 16(2) | 0(2)  |
| C(17) | 28(2)  | 18(2)  | 30(3) | -1(2)  | 15(2) | 0(2)  |
| C(18) | 18(2)  | 20(2)  | 30(3) | 2(2)   | 9(2)  | 1(2)  |
| C(19) | 32(3)  | 23(3)  | 35(3) | 1(2)   | 19(2) | -3(2) |
| C(20) | 23(2)  | 27(3)  | 20(2) | 1(2)   | 8(2)  | 3(2)  |
| C(21) | 25(2)  | 22(3)  | 17(2) | 2(2)   | 6(2)  | -3(2) |
| C(22) | 21(2)  | 25(2)  | 22(2) | 9(3)   | 8(1)  | 9(3)  |
| C(23) | 27(3)  | 30(3)  | 33(3) | -2(2)  | 12(2) | -1(2) |
| C(24) | 31(3)  | 38(3)  | 42(3) | 3(3)   | 16(3) | 11(2) |
| C(25) | 27(3)  | 56(4)  | 45(4) | 5(3)   | 20(2) | 2(2)  |
| C(26) | 30(3)  | 41(4)  | 40(3) | 0(3)   | 19(3) | -8(3) |
| C(27) | 22(3)  | 27(3)  | 22(3) | 0(2)   | 4(2)  | -3(2) |
| C(28) | 26(2)  | 25(3)  | 34(3) | 7(2)   | 7(2)  | -8(2) |
| C(29) | 32(2)  | 15(2)  | 30(3) | 0(2)   | 9(2)  | 0(2)  |

Table 5. Hydrogen coordinates ( $\times 10^4$ ) and isotropic displacement parameters ( $\text{Å}^2 \times 10^3$ ) for **6a**.

|       | x     | y     | z     | U(eq) |
|-------|-------|-------|-------|-------|
| H(3)  | 6356  | 2185  | 5456  | 38    |
| H(1B) | 9609  | 621   | 3272  | 76    |
| H(1C) | 10526 | 1159  | 2553  | 76    |
| H(1A) | 9336  | 250   | 1904  | 76    |
| H(2A) | 7883  | 3019  | 2508  | 74    |
| H(2C) | 9661  | 2771  | 3005  | 74    |
| H(2B) | 8640  | 2212  | 3618  | 74    |
| H(3A) | 8451  | 1402  | 287   | 61    |
| H(3B) | 9087  | 2512  | 888   | 61    |
| H(4B) | 6769  | 2707  | -774  | 70    |
| H(4A) | 6640  | 3076  | 478   | 70    |
| H(5A) | 4756  | 394   | -1204 | 111   |
| H(5C) | 6531  | 591   | -829  | 111   |
| H(5B) | 5304  | 1262  | -1909 | 111   |
| H(6A) | 3237  | 1804  | -857  | 106   |
| H(6C) | 3987  | 2649  | -1440 | 106   |
| H(6B) | 4078  | 2799  | -64   | 106   |
| H(7A) | 3303  | 943   | 1177  | 84    |
| H(7C) | 3996  | -195  | 1579  | 84    |
| H(7B) | 3533  | 189   | 185   | 84    |
| H(10) | 5386  | -1054 | 4459  | 34    |
| H(11) | 5743  | -1941 | 6251  | 33    |
| H(13) | 7092  | -2148 | 8525  | 39    |
| H(14) | 9024  | -1694 | 10348 | 46    |
| H(15) | 10712 | -342  | 10402 | 40    |
| H(16) | 10356 | 601   | 8654  | 33    |
| H(23) | 10328 | -583  | 5848  | 36    |
| H(24) | 12483 | -881  | 5489  | 44    |
| H(25) | 13953 | 501   | 5323  | 49    |
| H(26) | 13493 | 2155  | 5775  | 42    |
| H(28) | 11902 | 3402  | 6371  | 36    |
| H(29) | 9862  | 3717  | 6886  | 32    |



Table 6. Torsion angles [deg] for **6a**.

|                         |           |
|-------------------------|-----------|
| C(7)–Pd(1)–O(1)–C(8)    | –92.0(4)  |
| N(2)–Pd(1)–O(1)–C(8)    | 142(3)    |
| N(1)–Pd(1)–O(1)–C(8)    | 88.1(3)   |
| C(7)–Pd(1)–N(1)–C(3)    | –12(8)    |
| O(1)–Pd(1)–N(1)–C(3)    | 165.3(3)  |
| N(2)–Pd(1)–N(1)–C(3)    | –11.5(4)  |
| C(7)–Pd(1)–N(1)–C(1)    | –131(7)   |
| O(1)–Pd(1)–N(1)–C(1)    | 46.2(4)   |
| N(2)–Pd(1)–N(1)–C(1)    | –130.6(4) |
| C(7)–Pd(1)–N(1)–C(2)    | 108(8)    |
| O(1)–Pd(1)–N(1)–C(2)    | –74.9(4)  |
| N(2)–Pd(1)–N(1)–C(2)    | 108.3(4)  |
| C(7)–Pd(1)–N(2)–C(6)    | 44.7(6)   |
| O(1)–Pd(1)–N(2)–C(6)    | 170(3)    |
| N(1)–Pd(1)–N(2)–C(6)    | –135.3(5) |
| C(7)–Pd(1)–N(2)–C(5)    | –79.5(4)  |
| O(1)–Pd(1)–N(2)–C(5)    | 46(3)     |
| N(1)–Pd(1)–N(2)–C(5)    | 100.5(4)  |
| C(7)–Pd(1)–N(2)–C(4)    | 163.5(4)  |
| O(1)–Pd(1)–N(2)–C(4)    | –71(3)    |
| N(1)–Pd(1)–N(2)–C(4)    | –16.5(4)  |
| C(1)–N(1)–C(3)–C(4)     | 160.0(6)  |
| C(2)–N(1)–C(3)–C(4)     | –80.4(6)  |
| Pd(1)–N(1)–C(3)–C(4)    | 38.8(6)   |
| N(1)–C(3)–C(4)–N(2)     | –58.9(7)  |
| C(6)–N(2)–C(4)–C(3)     | 168.2(5)  |
| C(5)–N(2)–C(4)–C(3)     | –72.6(7)  |
| Pd(1)–N(2)–C(4)–C(3)    | 44.0(6)   |
| Pd(1)–O(1)–C(8)–O(2)    | –2.5(7)   |
| Pd(1)–O(1)–C(8)–C(9)    | 176.8(3)  |
| O(2)–C(8)–C(9)–C(18)    | –58.9(7)  |
| O(1)–C(8)–C(9)–C(18)    | 121.8(5)  |
| O(2)–C(8)–C(9)–C(10)    | 116.8(5)  |
| O(1)–C(8)–C(9)–C(10)    | –62.5(6)  |
| C(18)–C(9)–C(10)–C(11)  | 3.1(7)    |
| C(8)–C(9)–C(10)–C(11)   | –172.7(4) |
| C(9)–C(10)–C(11)–C(12)  | –1.0(7)   |
| C(10)–C(11)–C(12)–C(13) | 179.2(5)  |
| C(10)–C(11)–C(12)–C(17) | –2.3(7)   |
| C(11)–C(12)–C(13)–C(14) | 177.2(5)  |
| C(17)–C(12)–C(13)–C(14) | –1.3(8)   |
| C(12)–C(13)–C(14)–C(15) | –0.3(8)   |

|                         |           |
|-------------------------|-----------|
| C(13)-C(14)-C(15)-C(16) | 2.0(8)    |
| C(14)-C(15)-C(16)-C(17) | -2.0(8)   |
| C(15)-C(16)-C(17)-C(18) | 179.4(5)  |
| C(15)-C(16)-C(17)-C(12) | 0.4(7)    |
| C(11)-C(12)-C(17)-C(16) | -177.4(5) |
| C(13)-C(12)-C(17)-C(16) | 1.2(7)    |
| C(11)-C(12)-C(17)-C(18) | 3.6(7)    |
| C(13)-C(12)-C(17)-C(18) | -177.8(5) |
| C(10)-C(9)-C(18)-C(17)  | -1.7(7)   |
| C(8)-C(9)-C(18)-C(17)   | 173.9(4)  |
| C(10)-C(9)-C(18)-C(21)  | 176.2(4)  |
| C(8)-C(9)-C(18)-C(21)   | -8.2(7)   |
| C(16)-C(17)-C(18)-C(9)  | 179.4(4)  |
| C(12)-C(17)-C(18)-C(9)  | -1.7(7)   |
| C(16)-C(17)-C(18)-C(21) | 1.6(7)    |
| C(12)-C(17)-C(18)-C(21) | -179.5(4) |
| O(4)-C(19)-C(20)-C(21)  | 130.1(6)  |
| O(3)-C(19)-C(20)-C(21)  | -52.4(7)  |
| O(4)-C(19)-C(20)-C(29)  | -49.4(7)  |
| O(3)-C(19)-C(20)-C(29)  | 128.1(5)  |
| C(29)-C(20)-C(21)-C(22) | 0.6(7)    |
| C(19)-C(20)-C(21)-C(22) | -178.9(4) |
| C(29)-C(20)-C(21)-C(18) | 178.1(4)  |
| C(19)-C(20)-C(21)-C(18) | -1.4(7)   |
| C(9)-C(18)-C(21)-C(20)  | 95.3(5)   |
| C(17)-C(18)-C(21)-C(20) | -86.9(6)  |
| C(9)-C(18)-C(21)-C(22)  | -87.2(5)  |
| C(17)-C(18)-C(21)-C(22) | 90.6(5)   |
| C(20)-C(21)-C(22)-C(27) | -3.4(6)   |
| C(18)-C(21)-C(22)-C(27) | 179.0(4)  |
| C(20)-C(21)-C(22)-C(23) | 176.5(4)  |
| C(18)-C(21)-C(22)-C(23) | -1.1(6)   |
| C(27)-C(22)-C(23)-C(24) | 0.4(7)    |
| C(21)-C(22)-C(23)-C(24) | -179.5(5) |
| C(22)-C(23)-C(24)-C(25) | -2.9(9)   |
| C(23)-C(24)-C(25)-C(26) | 4.3(10)   |
| C(24)-C(25)-C(26)-C(27) | -3.1(11)  |
| C(21)-C(22)-C(27)-C(28) | 3.7(7)    |
| C(23)-C(22)-C(27)-C(28) | -176.2(5) |
| C(21)-C(22)-C(27)-C(26) | -179.3(5) |
| C(23)-C(22)-C(27)-C(26) | 0.7(7)    |
| C(25)-C(26)-C(27)-C(22) | 0.6(9)    |
| C(25)-C(26)-C(27)-C(28) | 177.4(6)  |
| C(22)-C(27)-C(28)-C(29) | -1.2(7)   |

|                         |           |
|-------------------------|-----------|
| C(26)–C(27)–C(28)–C(29) | –178.1(5) |
| C(27)–C(28)–C(29)–C(20) | –1.6(8)   |
| C(21)–C(20)–C(29)–C(28) | 1.9(7)    |
| C(19)–C(20)–C(29)–C(28) | –178.6(4) |

---

Symmetry transformations used to generate equivalent atoms:

Table 7. Hydrogen bonds for **6a** [A and deg.].

---

| D–H...A          | d(D–H) | d(H...A) | d(D...A) | <(DHA) |
|------------------|--------|----------|----------|--------|
| O(3)–H(3)...O(2) | 0.84   | 1.74     | 2.552(5) | 162.2  |

---

Symmetry transformations used to generate equivalent atoms:

### The X-ray structure of compound 6c

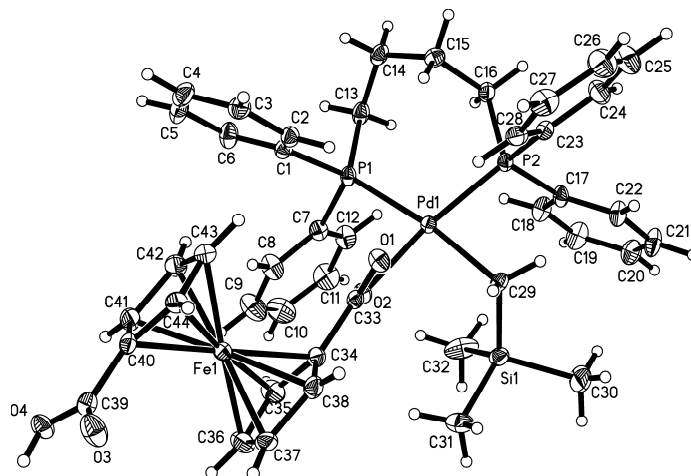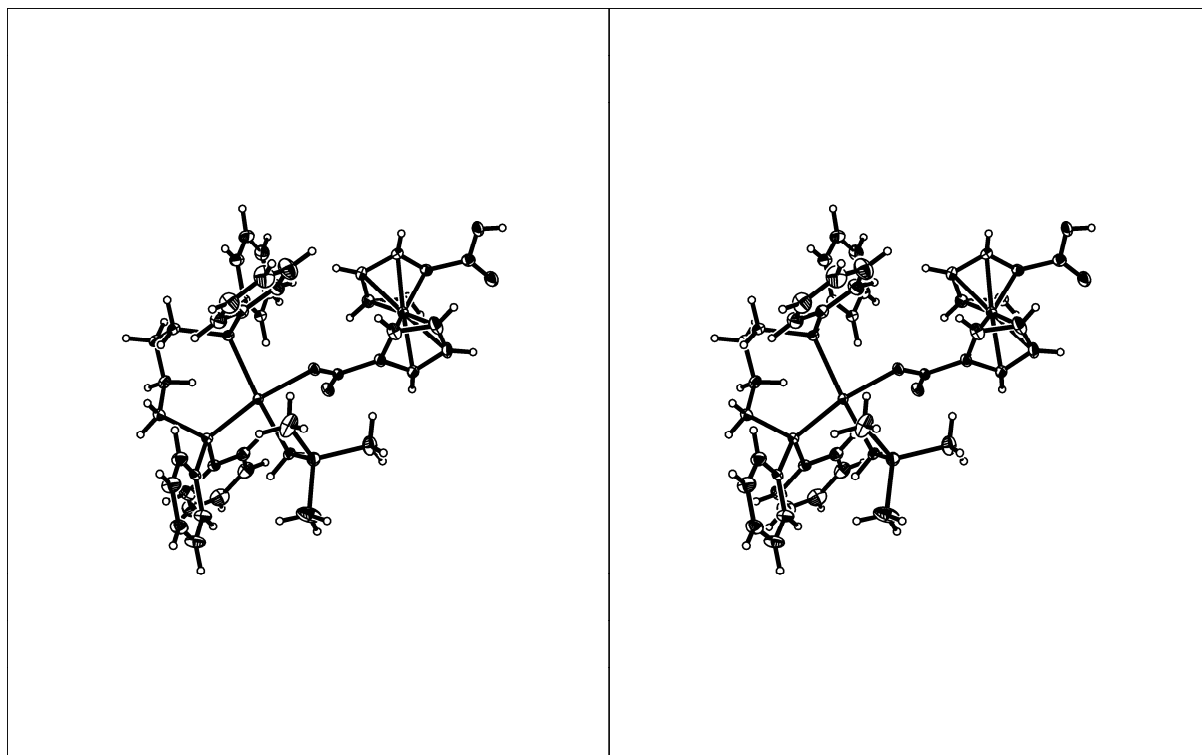

Table 1. Crystal data and structure refinement for **6c**.

|                                   |                                                                                                                   |
|-----------------------------------|-------------------------------------------------------------------------------------------------------------------|
| Identification code               | a                                                                                                                 |
| Empirical formula                 | C <sub>45</sub> H <sub>50</sub> Cl <sub>2</sub> Fe O <sub>4</sub> P <sub>2</sub> Pd Si                            |
| Formula weight                    | 978.03                                                                                                            |
| Temperature                       | 173(2) K                                                                                                          |
| Wavelength                        | 0.71073 Å                                                                                                         |
| Crystal system, space group       | Orthorhombic, P2(1)2(1)2(1)                                                                                       |
| Unit cell dimensions              | a = 12.5186(13) Å    alpha = 90 deg.<br>b = 17.3401(18) Å    beta = 90 deg.<br>c = 20.879(2) Å    gamma = 90 deg. |
| Volume                            | 4532.2(8) Å <sup>3</sup>                                                                                          |
| Z, Calculated density             | 4, 1.433 Mg/m <sup>3</sup>                                                                                        |
| Absorption coefficient            | 0.972 mm <sup>-1</sup>                                                                                            |
| F(000)                            | 2008                                                                                                              |
| Crystal size                      | 0.23 x 0.19 x 0.14 mm                                                                                             |
| Theta range for data collection   | 1.95 to 27.49 deg.                                                                                                |
| Limiting indices                  | -14<=h<=16, -13<=k<=22, -27<=l<=27                                                                                |
| Reflections collected / unique    | 20337 / 10348 [R(int) = 0.0339]                                                                                   |
| Completeness to theta = 27.49     | 99.7 %                                                                                                            |
| Absorption correction             | Semi-empirical from equivalents                                                                                   |
| Max. and min. transmission        | 1.0000 and 0.6506                                                                                                 |
| Refinement method                 | Full-matrix least-squares on F <sup>2</sup>                                                                       |
| Data / restraints / parameters    | 10348 / 0 / 508                                                                                                   |
| Goodness-of-fit on F <sup>2</sup> | 1.065                                                                                                             |
| Final R indices [I>2sigma(I)]     | R1 = 0.0423, wR2 = 0.0921                                                                                         |
| R indices (all data)              | R1 = 0.0449, wR2 = 0.0944                                                                                         |
| Absolute structure parameter      | -0.014(17)                                                                                                        |
| Largest diff. peak and hole       | 0.778 and -0.528 e.Å <sup>-3</sup>                                                                                |

Table 2. Atomic coordinates ( $\times 10^4$ ) and equivalent isotropic displacement parameters ( $\text{\AA}^2 \times 10^3$ ) for **6c**.  
U(eq) is defined as one third of the trace of the orthogonalized Uij tensor.

|       | x       | y       | z        | U(eq)  |
|-------|---------|---------|----------|--------|
| Pd(1) | 5903(1) | 3886(1) | 7874(1)  | 22(1)  |
| Fe(1) | 8121(1) | 2863(1) | 5556(1)  | 28(1)  |
| Cl(1) | 1200(2) | 4203(2) | 6275(2)  | 184(2) |
| Cl(2) | 2185(2) | 4720(2) | 5124(1)  | 134(1) |
| P(1)  | 6179(1) | 5127(1) | 7469(1)  | 26(1)  |
| P(2)  | 4512(1) | 4036(1) | 8506(1)  | 25(1)  |
| Si(1) | 7204(1) | 2570(1) | 8662(1)  | 32(1)  |
| O(1)  | 5976(2) | 2859(2) | 6743(1)  | 31(1)  |
| O(2)  | 7194(2) | 3533(2) | 7278(1)  | 27(1)  |
| O(3)  | 8888(3) | 1882(2) | 4027(2)  | 49(1)  |
| O(4)  | 9986(2) | 2900(2) | 4104(1)  | 37(1)  |
| C(1)  | 6011(3) | 5258(2) | 6610(2)  | 30(1)  |
| C(2)  | 5404(3) | 4732(2) | 6270(2)  | 31(1)  |
| C(3)  | 5182(3) | 4853(3) | 5625(2)  | 37(1)  |
| C(4)  | 5584(4) | 5491(3) | 5318(2)  | 45(1)  |
| C(5)  | 6213(4) | 6014(3) | 5645(2)  | 52(1)  |
| C(6)  | 6420(4) | 5908(2) | 6293(2)  | 42(1)  |
| C(7)  | 7561(3) | 5377(2) | 7642(2)  | 33(1)  |
| C(8)  | 8375(3) | 5237(3) | 7215(2)  | 45(1)  |
| C(9)  | 9437(4) | 5409(4) | 7367(3)  | 65(2)  |
| C(10) | 9679(4) | 5713(3) | 7957(3)  | 65(2)  |
| C(11) | 8872(4) | 5835(3) | 8398(2)  | 57(1)  |
| C(12) | 7822(4) | 5670(3) | 8246(2)  | 43(1)  |
| C(13) | 5450(3) | 5966(2) | 7779(2)  | 35(1)  |
| C(14) | 4253(3) | 5975(2) | 7625(2)  | 36(1)  |
| C(15) | 3636(3) | 5256(2) | 7819(2)  | 35(1)  |
| C(16) | 3865(3) | 4986(2) | 8507(2)  | 33(1)  |
| C(17) | 4807(3) | 3867(2) | 9349(2)  | 29(1)  |
| C(18) | 5491(4) | 4388(3) | 9646(2)  | 40(1)  |
| C(19) | 5807(4) | 4282(3) | 10275(2) | 50(1)  |
| C(20) | 5465(4) | 3653(3) | 10608(2) | 47(1)  |
| C(21) | 4806(4) | 3126(3) | 10318(2) | 51(1)  |
| C(22) | 4467(4) | 3231(3) | 9687(2)  | 40(1)  |
| C(23) | 3384(3) | 3437(2) | 8274(2)  | 31(1)  |
| C(24) | 2452(3) | 3406(3) | 8646(2)  | 45(1)  |
| C(25) | 1571(4) | 3014(3) | 8422(3)  | 60(1)  |
| C(26) | 1576(4) | 2658(3) | 7839(3)  | 58(1)  |

|        |          |          |          |        |
|--------|----------|----------|----------|--------|
| C (27) | 2489 (4) | 2689 (3) | 7460 (2) | 48 (1) |
| C (28) | 3388 (3) | 3078 (2) | 7682 (2) | 34 (1) |
| C (29) | 5905 (3) | 2770 (2) | 8265 (2) | 26 (1) |
| C (30) | 6913 (4) | 2002 (4) | 9399 (3) | 77 (2) |
| C (31) | 8111 (4) | 1984 (3) | 8144 (2) | 46 (1) |
| C (32) | 7937 (4) | 3460 (3) | 8884 (3) | 59 (2) |
| C (33) | 6926 (3) | 3040 (2) | 6859 (2) | 23 (1) |
| C (34) | 7807 (3) | 2661 (2) | 6498 (2) | 28 (1) |
| C (35) | 8862 (3) | 2951 (3) | 6431 (2) | 40 (1) |
| C (36) | 9431 (4) | 2440 (3) | 6033 (2) | 46 (1) |
| C (37) | 8739 (4) | 1835 (3) | 5850 (2) | 42 (1) |
| C (38) | 7734 (4) | 1968 (2) | 6132 (2) | 35 (1) |
| C (39) | 9085 (3) | 2529 (2) | 4217 (2) | 32 (1) |
| C (40) | 8326 (3) | 2987 (2) | 4596 (2) | 31 (1) |
| C (41) | 8522 (3) | 3696 (2) | 4915 (2) | 36 (1) |
| C (42) | 7570 (3) | 3910 (2) | 5240 (2) | 37 (1) |
| C (43) | 6787 (3) | 3329 (2) | 5127 (2) | 36 (1) |
| C (44) | 7253 (3) | 2759 (2) | 4736 (2) | 34 (1) |
| C (45) | 2326 (5) | 4586 (4) | 5937 (3) | 77 (2) |

---

Table 3. Bond lengths [Å] and angles [deg] for **6c**.

---

|             |            |
|-------------|------------|
| Pd(1)–C(29) | 2.100(3)   |
| Pd(1)–O(2)  | 2.129(2)   |
| Pd(1)–P(2)  | 2.2003(9)  |
| Pd(1)–P(1)  | 2.3381(10) |
| Fe(1)–C(38) | 2.023(4)   |
| Fe(1)–C(40) | 2.031(3)   |
| Fe(1)–C(41) | 2.031(4)   |
| Fe(1)–C(44) | 2.035(4)   |
| Fe(1)–C(34) | 2.036(3)   |
| Fe(1)–C(37) | 2.038(4)   |
| Fe(1)–C(42) | 2.052(4)   |
| Fe(1)–C(36) | 2.055(4)   |
| Fe(1)–C(35) | 2.056(4)   |
| Fe(1)–C(43) | 2.060(4)   |
| Cl(1)–C(45) | 1.711(7)   |
| Cl(2)–C(45) | 1.723(7)   |
| P(1)–C(7)   | 1.820(4)   |
| P(1)–C(1)   | 1.821(4)   |
| P(1)–C(13)  | 1.835(4)   |
| P(2)–C(23)  | 1.820(4)   |
| P(2)–C(17)  | 1.822(4)   |
| P(2)–C(16)  | 1.836(4)   |
| Si(1)–C(32) | 1.856(5)   |
| Si(1)–C(29) | 1.858(4)   |
| Si(1)–C(30) | 1.864(5)   |
| Si(1)–C(31) | 1.868(4)   |
| O(1)–C(33)  | 1.253(4)   |
| O(2)–C(33)  | 1.269(4)   |
| O(3)–C(39)  | 1.216(5)   |
| O(4)–C(39)  | 1.319(5)   |
| O(4)–H(4)   | 0.8399     |
| C(1)–C(2)   | 1.384(5)   |
| C(1)–C(6)   | 1.403(5)   |
| C(2)–C(3)   | 1.392(5)   |
| C(2)–H(2)   | 0.9500     |
| C(3)–C(4)   | 1.374(6)   |
| C(3)–H(3)   | 0.9500     |
| C(4)–C(5)   | 1.381(7)   |
| C(4)–H(4A)  | 0.9500     |
| C(5)–C(6)   | 1.391(6)   |
| C(5)–H(5)   | 0.9500     |
| C(6)–H(6)   | 0.9500     |



|                |            |
|----------------|------------|
| C (7)–C (8)    | 1. 376 (6) |
| C (7)–C (12)   | 1. 397 (6) |
| C (8)–C (9)    | 1. 399 (7) |
| C (8)–H (8)    | 0. 9500    |
| C (9)–C (10)   | 1. 374 (8) |
| C (9)–H (9)    | 0. 9500    |
| C (10)–C (11)  | 1. 381 (8) |
| C (10)–H (10)  | 0. 9500    |
| C (11)–C (12)  | 1. 383 (7) |
| C (11)–H (11)  | 0. 9500    |
| C (12)–H (12)  | 0. 9500    |
| C (13)–C (14)  | 1. 533 (6) |
| C (13)–H (13B) | 0. 9900    |
| C (13)–H (13A) | 0. 9900    |
| C (14)–C (15)  | 1. 522 (5) |
| C (14)–H (14B) | 0. 9900    |
| C (14)–H (14A) | 0. 9900    |
| C (15)–C (16)  | 1. 537 (5) |
| C (15)–H (15A) | 0. 9900    |
| C (15)–H (15B) | 0. 9900    |
| C (16)–H (16A) | 0. 9900    |
| C (16)–H (16B) | 0. 9900    |
| C (17)–C (22)  | 1. 378 (5) |
| C (17)–C (18)  | 1. 390 (6) |
| C (18)–C (19)  | 1. 384 (6) |
| C (18)–H (18)  | 0. 9500    |
| C (19)–C (20)  | 1. 362 (6) |
| C (19)–H (19)  | 0. 9500    |
| C (20)–C (21)  | 1. 371 (7) |
| C (20)–H (20)  | 0. 9500    |
| C (21)–C (22)  | 1. 396 (6) |
| C (21)–H (21)  | 0. 9500    |
| C (22)–H (22)  | 0. 9500    |
| C (23)–C (28)  | 1. 383 (5) |
| C (23)–C (24)  | 1. 402 (6) |
| C (24)–C (25)  | 1. 378 (7) |
| C (24)–H (24)  | 0. 9500    |
| C (25)–C (26)  | 1. 365 (8) |
| C (25)–H (25)  | 0. 9500    |
| C (26)–C (27)  | 1. 391 (7) |
| C (26)–H (26)  | 0. 9500    |
| C (27)–C (28)  | 1. 392 (6) |
| C (27)–H (27)  | 0. 9500    |
| C (28)–H (28)  | 0. 9500    |

|                      |            |
|----------------------|------------|
| C (29)–H (29B)       | 0.9900     |
| C (29)–H (29A)       | 0.9900     |
| C (30)–H (30C)       | 0.9800     |
| C (30)–H (30A)       | 0.9800     |
| C (30)–H (30B)       | 0.9800     |
| C (31)–H (31B)       | 0.9800     |
| C (31)–H (31A)       | 0.9800     |
| C (31)–H (31C)       | 0.9800     |
| C (32)–H (32A)       | 0.9800     |
| C (32)–H (32C)       | 0.9800     |
| C (32)–H (32B)       | 0.9800     |
| C (33)–C (34)        | 1.489(5)   |
| C (34)–C (35)        | 1.419(6)   |
| C (34)–C (38)        | 1.427(5)   |
| C (35)–C (36)        | 1.410(6)   |
| C (35)–H (35)        | 0.9500     |
| C (36)–C (37)        | 1.413(7)   |
| C (36)–H (36)        | 0.9500     |
| C (37)–C (38)        | 1.409(6)   |
| C (37)–H (37)        | 0.9500     |
| C (38)–H (38)        | 0.9500     |
| C (39)–C (40)        | 1.470(5)   |
| C (40)–C (41)        | 1.419(5)   |
| C (40)–C (44)        | 1.430(5)   |
| C (41)–C (42)        | 1.421(5)   |
| C (41)–H (41)        | 0.9500     |
| C (42)–C (43)        | 1.425(6)   |
| C (42)–H (42)        | 0.9500     |
| C (43)–C (44)        | 1.408(6)   |
| C (43)–H (43)        | 0.9500     |
| C (44)–H (44)        | 0.9500     |
| C (45)–H (45A)       | 0.9900     |
| C (45)–H (45B)       | 0.9900     |
|                      |            |
| C (29)–Pd (1)–O (2)  | 87.80(12)  |
| C (29)–Pd (1)–P (2)  | 82.95(11)  |
| O (2)–Pd (1)–P (2)   | 170.09(7)  |
| C (29)–Pd (1)–P (1)  | 171.35(11) |
| O (2)–Pd (1)–P (1)   | 86.61(7)   |
| P (2)–Pd (1)–P (1)   | 102.98(3)  |
| C (38)–Fe (1)–C (40) | 134.35(16) |
| C (38)–Fe (1)–C (41) | 175.16(16) |
| C (40)–Fe (1)–C (41) | 40.88(16)  |
| C (38)–Fe (1)–C (44) | 107.78(17) |

|                   |            |
|-------------------|------------|
| C(40)–Fe(1)–C(44) | 41.17(16)  |
| C(41)–Fe(1)–C(44) | 68.96(17)  |
| C(38)–Fe(1)–C(34) | 41.17(15)  |
| C(40)–Fe(1)–C(34) | 174.55(17) |
| C(41)–Fe(1)–C(34) | 143.65(16) |
| C(44)–Fe(1)–C(34) | 134.00(16) |
| C(38)–Fe(1)–C(37) | 40.60(17)  |
| C(40)–Fe(1)–C(37) | 110.04(16) |
| C(41)–Fe(1)–C(37) | 136.59(17) |
| C(44)–Fe(1)–C(37) | 112.29(18) |
| C(34)–Fe(1)–C(37) | 68.41(15)  |
| C(38)–Fe(1)–C(42) | 142.17(16) |
| C(40)–Fe(1)–C(42) | 68.36(16)  |
| C(41)–Fe(1)–C(42) | 40.72(15)  |
| C(44)–Fe(1)–C(42) | 68.18(17)  |
| C(34)–Fe(1)–C(42) | 113.41(15) |
| C(37)–Fe(1)–C(42) | 177.19(18) |
| C(38)–Fe(1)–C(36) | 68.21(19)  |
| C(40)–Fe(1)–C(36) | 114.54(16) |
| C(41)–Fe(1)–C(36) | 112.06(19) |
| C(44)–Fe(1)–C(36) | 143.37(17) |
| C(34)–Fe(1)–C(36) | 67.93(16)  |
| C(37)–Fe(1)–C(36) | 40.39(19)  |
| C(42)–Fe(1)–C(36) | 137.8(2)   |
| C(38)–Fe(1)–C(35) | 68.63(18)  |
| C(40)–Fe(1)–C(35) | 144.32(17) |
| C(41)–Fe(1)–C(35) | 114.89(19) |
| C(44)–Fe(1)–C(35) | 174.46(16) |
| C(34)–Fe(1)–C(35) | 40.57(16)  |
| C(37)–Fe(1)–C(35) | 68.01(19)  |
| C(42)–Fe(1)–C(35) | 111.81(18) |
| C(36)–Fe(1)–C(35) | 40.11(17)  |
| C(38)–Fe(1)–C(43) | 111.46(18) |
| C(40)–Fe(1)–C(43) | 68.39(16)  |
| C(41)–Fe(1)–C(43) | 68.60(17)  |
| C(44)–Fe(1)–C(43) | 40.21(16)  |
| C(34)–Fe(1)–C(43) | 109.34(16) |
| C(37)–Fe(1)–C(43) | 141.47(19) |
| C(42)–Fe(1)–C(43) | 40.56(17)  |
| C(36)–Fe(1)–C(43) | 176.42(18) |
| C(35)–Fe(1)–C(43) | 136.31(17) |
| C(7)–P(1)–C(1)    | 105.97(19) |
| C(7)–P(1)–C(13)   | 102.36(19) |
| C(1)–P(1)–C(13)   | 101.03(18) |

|                   |            |
|-------------------|------------|
| C(7)-P(1)-Pd(1)   | 106.73(13) |
| C(1)-P(1)-Pd(1)   | 117.01(12) |
| C(13)-P(1)-Pd(1)  | 121.93(13) |
| C(23)-P(2)-C(17)  | 108.85(17) |
| C(23)-P(2)-C(16)  | 99.79(19)  |
| C(17)-P(2)-C(16)  | 103.48(17) |
| C(23)-P(2)-Pd(1)  | 112.79(13) |
| C(17)-P(2)-Pd(1)  | 113.54(13) |
| C(16)-P(2)-Pd(1)  | 117.13(12) |
| C(32)-Si(1)-C(29) | 112.88(19) |
| C(32)-Si(1)-C(30) | 109.2(3)   |
| C(29)-Si(1)-C(30) | 107.2(2)   |
| C(32)-Si(1)-C(31) | 107.2(2)   |
| C(29)-Si(1)-C(31) | 112.05(18) |
| C(30)-Si(1)-C(31) | 108.1(3)   |
| C(33)-O(2)-Pd(1)  | 113.4(2)   |
| C(39)-O(4)-H(4)   | 99.7       |
| C(2)-C(1)-C(6)    | 119.3(4)   |
| C(2)-C(1)-P(1)    | 119.1(3)   |
| C(6)-C(1)-P(1)    | 121.5(3)   |
| C(1)-C(2)-C(3)    | 120.4(4)   |
| C(1)-C(2)-H(2)    | 119.8      |
| C(3)-C(2)-H(2)    | 119.8      |
| C(4)-C(3)-C(2)    | 120.0(4)   |
| C(4)-C(3)-H(3)    | 120.0      |
| C(2)-C(3)-H(3)    | 120.0      |
| C(3)-C(4)-C(5)    | 120.5(4)   |
| C(3)-C(4)-H(4A)   | 119.8      |
| C(5)-C(4)-H(4A)   | 119.8      |
| C(4)-C(5)-C(6)    | 120.1(4)   |
| C(4)-C(5)-H(5)    | 120.0      |
| C(6)-C(5)-H(5)    | 120.0      |
| C(5)-C(6)-C(1)    | 119.7(4)   |
| C(5)-C(6)-H(6)    | 120.1      |
| C(1)-C(6)-H(6)    | 120.1      |
| C(8)-C(7)-C(12)   | 118.4(4)   |
| C(8)-C(7)-P(1)    | 122.2(3)   |
| C(12)-C(7)-P(1)   | 119.2(3)   |
| C(7)-C(8)-C(9)    | 121.2(4)   |
| C(7)-C(8)-H(8)    | 119.4      |
| C(9)-C(8)-H(8)    | 119.4      |
| C(10)-C(9)-C(8)   | 119.7(5)   |
| C(10)-C(9)-H(9)   | 120.2      |
| C(8)-C(9)-H(9)    | 120.2      |

|                     |          |
|---------------------|----------|
| C(9)-C(10)-C(11)    | 119.6(5) |
| C(9)-C(10)-H(10)    | 120.2    |
| C(11)-C(10)-H(10)   | 120.2    |
| C(10)-C(11)-C(12)   | 120.7(5) |
| C(10)-C(11)-H(11)   | 119.6    |
| C(12)-C(11)-H(11)   | 119.6    |
| C(11)-C(12)-C(7)    | 120.3(4) |
| C(11)-C(12)-H(12)   | 119.9    |
| C(7)-C(12)-H(12)    | 119.9    |
| C(14)-C(13)-P(1)    | 114.8(3) |
| C(14)-C(13)-H(13B)  | 108.6    |
| P(1)-C(13)-H(13B)   | 108.6    |
| C(14)-C(13)-H(13A)  | 108.6    |
| P(1)-C(13)-H(13A)   | 108.6    |
| H(13B)-C(13)-H(13A) | 107.5    |
| C(15)-C(14)-C(13)   | 115.6(3) |
| C(15)-C(14)-H(14B)  | 108.4    |
| C(13)-C(14)-H(14B)  | 108.4    |
| C(15)-C(14)-H(14A)  | 108.4    |
| C(13)-C(14)-H(14A)  | 108.4    |
| H(14B)-C(14)-H(14A) | 107.4    |
| C(14)-C(15)-C(16)   | 113.8(3) |
| C(14)-C(15)-H(15A)  | 108.8    |
| C(16)-C(15)-H(15A)  | 108.8    |
| C(14)-C(15)-H(15B)  | 108.8    |
| C(16)-C(15)-H(15B)  | 108.8    |
| H(15A)-C(15)-H(15B) | 107.7    |
| C(15)-C(16)-P(2)    | 110.8(3) |
| C(15)-C(16)-H(16A)  | 109.5    |
| P(2)-C(16)-H(16A)   | 109.5    |
| C(15)-C(16)-H(16B)  | 109.5    |
| P(2)-C(16)-H(16B)   | 109.5    |
| H(16A)-C(16)-H(16B) | 108.1    |
| C(22)-C(17)-C(18)   | 118.8(4) |
| C(22)-C(17)-P(2)    | 124.2(3) |
| C(18)-C(17)-P(2)    | 116.9(3) |
| C(19)-C(18)-C(17)   | 120.9(4) |
| C(19)-C(18)-H(18)   | 119.6    |
| C(17)-C(18)-H(18)   | 119.6    |
| C(20)-C(19)-C(18)   | 120.1(4) |
| C(20)-C(19)-H(19)   | 120.0    |
| C(18)-C(19)-H(19)   | 120.0    |
| C(19)-C(20)-C(21)   | 119.9(4) |
| C(19)-C(20)-H(20)   | 120.1    |

|                        |              |
|------------------------|--------------|
| C (21)–C (20)–H (20)   | 120. 1       |
| C (20)–C (21)–C (22)   | 120. 7 (4)   |
| C (20)–C (21)–H (21)   | 119. 6       |
| C (22)–C (21)–H (21)   | 119. 6       |
| C (17)–C (22)–C (21)   | 119. 7 (4)   |
| C (17)–C (22)–H (22)   | 120. 2       |
| C (21)–C (22)–H (22)   | 120. 2       |
| C (28)–C (23)–C (24)   | 118. 8 (4)   |
| C (28)–C (23)–P (2)    | 119. 5 (3)   |
| C (24)–C (23)–P (2)    | 121. 3 (3)   |
| C (25)–C (24)–C (23)   | 119. 8 (5)   |
| C (25)–C (24)–H (24)   | 120. 1       |
| C (23)–C (24)–H (24)   | 120. 1       |
| C (26)–C (25)–C (24)   | 121. 4 (5)   |
| C (26)–C (25)–H (25)   | 119. 3       |
| C (24)–C (25)–H (25)   | 119. 3       |
| C (25)–C (26)–C (27)   | 119. 6 (4)   |
| C (25)–C (26)–H (26)   | 120. 2       |
| C (27)–C (26)–H (26)   | 120. 2       |
| C (26)–C (27)–C (28)   | 119. 6 (5)   |
| C (26)–C (27)–H (27)   | 120. 2       |
| C (28)–C (27)–H (27)   | 120. 2       |
| C (23)–C (28)–C (27)   | 120. 8 (4)   |
| C (23)–C (28)–H (28)   | 119. 6       |
| C (27)–C (28)–H (28)   | 119. 6       |
| Si (1)–C (29)–Pd (1)   | 110. 28 (18) |
| Si (1)–C (29)–H (29B)  | 109. 6       |
| Pd (1)–C (29)–H (29B)  | 109. 6       |
| Si (1)–C (29)–H (29A)  | 109. 6       |
| Pd (1)–C (29)–H (29A)  | 109. 6       |
| H (29B)–C (29)–H (29A) | 108. 1       |
| Si (1)–C (30)–H (30C)  | 109. 5       |
| Si (1)–C (30)–H (30A)  | 109. 5       |
| H (30C)–C (30)–H (30A) | 109. 5       |
| Si (1)–C (30)–H (30B)  | 109. 5       |
| H (30C)–C (30)–H (30B) | 109. 5       |
| H (30A)–C (30)–H (30B) | 109. 5       |
| Si (1)–C (31)–H (31B)  | 109. 5       |
| Si (1)–C (31)–H (31A)  | 109. 5       |
| H (31B)–C (31)–H (31A) | 109. 5       |
| Si (1)–C (31)–H (31C)  | 109. 5       |
| H (31B)–C (31)–H (31C) | 109. 5       |
| H (31A)–C (31)–H (31C) | 109. 5       |
| Si (1)–C (32)–H (32A)  | 109. 5       |

|                      |           |
|----------------------|-----------|
| Si (1)-C (32)-H(32C) | 109.5     |
| H(32A)-C (32)-H(32C) | 109.5     |
| Si (1)-C (32)-H(32B) | 109.5     |
| H(32A)-C (32)-H(32B) | 109.5     |
| H(32C)-C (32)-H(32B) | 109.5     |
| O (1)-C (33)-O (2)   | 123.5 (3) |
| O (1)-C (33)-C (34)  | 119.7 (3) |
| O (2)-C (33)-C (34)  | 116.8 (3) |
| C (35)-C (34)-C (38) | 107.8 (3) |
| C (35)-C (34)-C (33) | 125.7 (4) |
| C (38)-C (34)-C (33) | 126.5 (4) |
| C (35)-C (34)-Fe (1) | 70.5 (2)  |
| C (38)-C (34)-Fe (1) | 68.9 (2)  |
| C (33)-C (34)-Fe (1) | 123.8 (2) |
| C (36)-C (35)-C (34) | 107.8 (4) |
| C (36)-C (35)-Fe (1) | 69.9 (2)  |
| C (34)-C (35)-Fe (1) | 69.0 (2)  |
| C (36)-C (35)-H (35) | 126.1     |
| C (34)-C (35)-H (35) | 126.1     |
| Fe (1)-C (35)-H (35) | 126.6     |
| C (35)-C (36)-C (37) | 108.4 (4) |
| C (35)-C (36)-Fe (1) | 70.0 (2)  |
| C (37)-C (36)-Fe (1) | 69.2 (2)  |
| C (35)-C (36)-H (36) | 125.8     |
| C (37)-C (36)-H (36) | 125.8     |
| Fe (1)-C (36)-H (36) | 126.6     |
| C (38)-C (37)-C (36) | 108.3 (4) |
| C (38)-C (37)-Fe (1) | 69.1 (2)  |
| C (36)-C (37)-Fe (1) | 70.4 (3)  |
| C (38)-C (37)-H (37) | 125.9     |
| C (36)-C (37)-H (37) | 125.9     |
| Fe (1)-C (37)-H (37) | 126.1     |
| C (37)-C (38)-C (34) | 107.7 (4) |
| C (37)-C (38)-Fe (1) | 70.3 (2)  |
| C (34)-C (38)-Fe (1) | 69.9 (2)  |
| C (37)-C (38)-H (38) | 126.1     |
| C (34)-C (38)-H (38) | 126.1     |
| Fe (1)-C (38)-H (38) | 125.3     |
| O (3)-C (39)-O (4)   | 124.4 (4) |
| O (3)-C (39)-C (40)  | 122.9 (4) |
| O (4)-C (39)-C (40)  | 112.7 (3) |
| C (41)-C (40)-C (44) | 107.9 (3) |
| C (41)-C (40)-C (39) | 127.5 (4) |
| C (44)-C (40)-C (39) | 124.6 (4) |

|                     |          |
|---------------------|----------|
| C(41)-C(40)-Fe(1)   | 69.6(2)  |
| C(44)-C(40)-Fe(1)   | 69.6(2)  |
| C(39)-C(40)-Fe(1)   | 123.8(3) |
| C(40)-C(41)-C(42)   | 107.8(4) |
| C(40)-C(41)-Fe(1)   | 69.5(2)  |
| C(42)-C(41)-Fe(1)   | 70.4(2)  |
| C(40)-C(41)-H(41)   | 126.1    |
| C(42)-C(41)-H(41)   | 126.1    |
| Fe(1)-C(41)-H(41)   | 125.5    |
| C(41)-C(42)-C(43)   | 108.2(4) |
| C(41)-C(42)-Fe(1)   | 68.9(2)  |
| C(43)-C(42)-Fe(1)   | 70.0(2)  |
| C(41)-C(42)-H(42)   | 125.9    |
| C(43)-C(42)-H(42)   | 125.9    |
| Fe(1)-C(42)-H(42)   | 126.8    |
| C(44)-C(43)-C(42)   | 107.9(4) |
| C(44)-C(43)-Fe(1)   | 68.9(2)  |
| C(42)-C(43)-Fe(1)   | 69.4(2)  |
| C(44)-C(43)-H(43)   | 126.1    |
| C(42)-C(43)-H(43)   | 126.1    |
| Fe(1)-C(43)-H(43)   | 127.2    |
| C(43)-C(44)-C(40)   | 108.2(4) |
| C(43)-C(44)-Fe(1)   | 70.8(2)  |
| C(40)-C(44)-Fe(1)   | 69.2(2)  |
| C(43)-C(44)-H(44)   | 125.9    |
| C(40)-C(44)-H(44)   | 125.9    |
| Fe(1)-C(44)-H(44)   | 125.6    |
| Cl(1)-C(45)-Cl(2)   | 112.0(4) |
| Cl(1)-C(45)-H(45A)  | 109.2    |
| Cl(2)-C(45)-H(45A)  | 109.2    |
| Cl(1)-C(45)-H(45B)  | 109.2    |
| Cl(2)-C(45)-H(45B)  | 109.2    |
| H(45A)-C(45)-H(45B) | 107.9    |

---

Symmetry transformations used to generate equivalent atoms:



Table 4. Anisotropic displacement parameters ( $\text{\AA}^2 \times 10^3$ ) for **6c**.

The anisotropic displacement factor exponent takes the form:

$$-2 \pi^2 [ h^2 a^{*2} U_{11} + \dots + 2 h k a^* b^* U_{12} ]$$

|       | U11    | U22    | U33    | U23    | U13    | U12    |
|-------|--------|--------|--------|--------|--------|--------|
| Pd(1) | 26(1)  | 19(1)  | 19(1)  | -1(1)  | 2(1)   | 0(1)   |
| Fe(1) | 30(1)  | 28(1)  | 25(1)  | 0(1)   | 5(1)   | 6(1)   |
| Cl(1) | 134(2) | 127(2) | 293(4) | 58(2)  | 130(3) | 35(2)  |
| Cl(2) | 150(2) | 165(2) | 86(1)  | 12(1)  | -33(1) | 59(2)  |
| P(1)  | 35(1)  | 20(1)  | 24(1)  | -1(1)  | 6(1)   | -4(1)  |
| P(2)  | 31(1)  | 23(1)  | 23(1)  | 1(1)   | 6(1)   | 0(1)   |
| Si(1) | 35(1)  | 33(1)  | 27(1)  | 2(1)   | -2(1)  | 6(1)   |
| O(1)  | 29(1)  | 39(1)  | 24(1)  | -8(1)  | 0(1)   | -3(1)  |
| O(2)  | 29(1)  | 29(1)  | 23(1)  | -5(1)  | 4(1)   | -1(1)  |
| O(3)  | 55(2)  | 41(2)  | 51(2)  | -16(1) | 19(2)  | -9(2)  |
| O(4)  | 40(2)  | 37(2)  | 34(1)  | -10(1) | 9(1)   | 4(1)   |
| C(1)  | 38(2)  | 24(2)  | 28(2)  | 2(1)   | 3(2)   | 2(2)   |
| C(2)  | 35(2)  | 25(2)  | 31(2)  | 3(2)   | 5(2)   | 0(2)   |
| C(3)  | 38(2)  | 43(2)  | 31(2)  | -2(2)  | -2(2)  | 5(2)   |
| C(4)  | 60(3)  | 50(3)  | 25(2)  | 5(2)   | -2(2)  | 14(2)  |
| C(5)  | 79(3)  | 37(2)  | 39(2)  | 13(2)  | 14(2)  | 5(2)   |
| C(6)  | 60(3)  | 31(2)  | 37(2)  | 1(2)   | 12(2)  | -7(2)  |
| C(7)  | 35(2)  | 28(2)  | 35(2)  | -3(2)  | 3(2)   | -4(2)  |
| C(8)  | 43(2)  | 51(3)  | 42(2)  | -12(2) | 5(2)   | -10(2) |
| C(9)  | 41(3)  | 85(4)  | 69(4)  | -13(3) | 7(2)   | -8(3)  |
| C(10) | 38(2)  | 76(4)  | 80(4)  | -13(3) | -12(3) | -10(3) |
| C(11) | 57(3)  | 63(3)  | 52(3)  | -16(2) | -12(2) | -13(3) |
| C(12) | 48(3)  | 46(3)  | 37(2)  | -7(2)  | 0(2)   | -8(2)  |
| C(13) | 49(2)  | 23(2)  | 33(2)  | 2(2)   | 8(2)   | -2(2)  |
| C(14) | 50(2)  | 23(2)  | 35(2)  | 6(2)   | 7(2)   | 7(2)   |
| C(15) | 37(2)  | 26(2)  | 43(2)  | 4(2)   | 3(2)   | 7(2)   |
| C(16) | 38(2)  | 31(2)  | 30(2)  | 5(2)   | 10(2)  | 4(2)   |
| C(17) | 39(2)  | 26(2)  | 21(2)  | -2(2)  | 10(1)  | -1(2)  |
| C(18) | 57(3)  | 32(2)  | 31(2)  | -1(2)  | -2(2)  | -9(2)  |
| C(19) | 71(3)  | 42(2)  | 37(2)  | -3(2)  | -10(2) | -17(3) |
| C(20) | 60(3)  | 52(3)  | 27(2)  | 5(2)   | -3(2)  | -3(2)  |
| C(21) | 65(3)  | 58(3)  | 31(2)  | 18(2)  | 0(2)   | -16(3) |
| C(22) | 46(2)  | 42(2)  | 30(2)  | 7(2)   | -1(2)  | -15(2) |
| C(23) | 33(2)  | 28(2)  | 31(2)  | 7(2)   | 4(2)   | 3(2)   |
| C(24) | 33(2)  | 58(3)  | 42(2)  | 2(2)   | 6(2)   | -4(2)  |
| C(25) | 39(3)  | 67(4)  | 75(4)  | 7(3)   | 9(3)   | -9(2)  |
| C(26) | 41(2)  | 58(3)  | 75(3)  | 4(3)   | -13(3) | -15(2) |
| C(27) | 49(3)  | 41(2)  | 54(3)  | -4(2)  | -14(2) | -6(2)  |

|        |        |         |        |         |         |        |
|--------|--------|---------|--------|---------|---------|--------|
| C (28) | 31 (2) | 31 (2)  | 40 (2) | 3 (2)   | -4 (2)  | 1 (2)  |
| C (29) | 37 (2) | 19 (2)  | 22 (2) | -1 (1)  | -2 (2)  | 0 (2)  |
| C (30) | 51 (3) | 119 (5) | 60 (3) | 56 (4)  | 2 (3)   | 13 (3) |
| C (31) | 39 (2) | 55 (3)  | 44 (2) | -7 (2)  | -9 (2)  | 15 (2) |
| C (32) | 60 (3) | 46 (3)  | 72 (3) | -17 (3) | -38 (3) | 9 (2)  |
| C (33) | 30 (2) | 24 (2)  | 16 (1) | -1 (1)  | 1 (1)   | 2 (2)  |
| C (34) | 35 (2) | 32 (2)  | 19 (2) | -1 (1)  | 3 (2)   | 6 (2)  |
| C (35) | 33 (2) | 55 (3)  | 32 (2) | -7 (2)  | -4 (2)  | 3 (2)  |
| C (36) | 36 (2) | 70 (3)  | 32 (2) | 0 (2)   | 4 (2)   | 19 (2) |
| C (37) | 55 (3) | 42 (2)  | 29 (2) | 4 (2)   | 10 (2)  | 27 (2) |
| C (38) | 49 (2) | 28 (2)  | 27 (2) | 3 (2)   | 9 (2)   | 7 (2)  |
| C (39) | 37 (2) | 34 (2)  | 24 (2) | 3 (2)   | -1 (2)  | -1 (2) |
| C (40) | 40 (2) | 32 (2)  | 21 (2) | 6 (2)   | 6 (2)   | 6 (2)  |
| C (41) | 43 (2) | 23 (2)  | 41 (2) | 5 (2)   | 13 (2)  | 3 (2)  |
| C (42) | 45 (2) | 24 (2)  | 43 (2) | 1 (2)   | 12 (2)  | 8 (2)  |
| C (43) | 32 (2) | 39 (2)  | 37 (2) | 9 (2)   | 3 (2)   | 10 (2) |
| C (44) | 30 (2) | 40 (2)  | 32 (2) | 4 (2)   | -1 (2)  | 4 (2)  |
| C (45) | 69 (4) | 76 (4)  | 86 (4) | 2 (4)   | 0 (4)   | 6 (3)  |

---

Table 5. Hydrogen coordinates ( $\times 10^4$ ) and isotropic displacement parameters ( $\text{Å}^2 \times 10^3$ ) for **6c**.

|        | x     | y    | z     | U(eq) |
|--------|-------|------|-------|-------|
| H(4)   | 10310 | 2562 | 3890  | 44    |
| H(2)   | 5136  | 4285 | 6479  | 37    |
| H(3)   | 4754  | 4494 | 5396  | 45    |
| H(4A)  | 5428  | 5573 | 4878  | 54    |
| H(5)   | 6504  | 6446 | 5426  | 62    |
| H(6)   | 6837  | 6275 | 6521  | 51    |
| H(8)   | 8213  | 5018 | 6809  | 55    |
| H(9)   | 9988  | 5316 | 7064  | 78    |
| H(10)  | 10396 | 5838 | 8062  | 78    |
| H(11)  | 9041  | 6034 | 8809  | 69    |
| H(12)  | 7275  | 5755 | 8553  | 52    |
| H(13B) | 5538  | 5984 | 8250  | 42    |
| H(13A) | 5778  | 6440 | 7601  | 42    |
| H(14B) | 3926  | 6425 | 7841  | 43    |
| H(14A) | 4166  | 6050 | 7157  | 43    |
| H(15A) | 3817  | 4833 | 7519  | 42    |
| H(15B) | 2862  | 5361 | 7776  | 42    |
| H(16A) | 3186  | 4957 | 8749  | 40    |
| H(16B) | 4334  | 5365 | 8722  | 40    |
| H(18)  | 5745  | 4822 | 9414  | 48    |
| H(19)  | 6263  | 4647 | 10475 | 60    |
| H(20)  | 5682  | 3580 | 11039 | 56    |
| H(21)  | 4577  | 2684 | 10550 | 61    |
| H(22)  | 4005  | 2866 | 9492  | 47    |
| H(24)  | 2429  | 3655 | 9051  | 54    |
| H(25)  | 945   | 2992 | 8679  | 72    |
| H(26)  | 961   | 2390 | 7694  | 69    |
| H(27)  | 2498  | 2446 | 7052  | 58    |
| H(28)  | 4013  | 3097 | 7424  | 41    |
| H(29B) | 5319  | 2722 | 8581  | 31    |
| H(29A) | 5781  | 2388 | 7921  | 31    |
| H(30C) | 7579  | 1787 | 9569  | 115   |
| H(30A) | 6419  | 1582 | 9296  | 115   |
| H(30B) | 6588  | 2339 | 9721  | 115   |
| H(31B) | 8342  | 2295 | 7777  | 69    |
| H(31A) | 7730  | 1527 | 7990  | 69    |
| H(31C) | 8737  | 1824 | 8392  | 69    |
| H(32A) | 8061  | 3773 | 8500  | 89    |
| H(32C) | 8625  | 3322 | 9077  | 89    |

|        |       |      |      |    |
|--------|-------|------|------|----|
| H(32B) | 7514  | 3756 | 9193 | 89 |
| H(35)  | 9135  | 3408 | 6622 | 48 |
| H(36)  | 10157 | 2493 | 5908 | 55 |
| H(37)  | 8921  | 1411 | 5583 | 50 |
| H(38)  | 7118  | 1652 | 6088 | 42 |
| H(41)  | 9174  | 3976 | 4912 | 43 |
| H(42)  | 7472  | 4363 | 5489 | 45 |
| H(43)  | 6077  | 3327 | 5286 | 43 |
| H(44)  | 6914  | 2302 | 4590 | 41 |
| H(45A) | 2937  | 4236 | 6017 | 93 |
| H(45B) | 2486  | 5087 | 6142 | 93 |

---

Table 6. Torsion angles [deg] for **6c**.

|                        |             |
|------------------------|-------------|
| C(29)-Pd(1)-P(1)-C(7)  | -7.2(6)     |
| O(2)-Pd(1)-P(1)-C(7)   | -57.07(15)  |
| P(2)-Pd(1)-P(1)-C(7)   | 125.44(13)  |
| C(29)-Pd(1)-P(1)-C(1)  | 111.2(6)    |
| O(2)-Pd(1)-P(1)-C(1)   | 61.34(17)   |
| P(2)-Pd(1)-P(1)-C(1)   | -116.16(15) |
| C(29)-Pd(1)-P(1)-C(13) | -124.0(6)   |
| O(2)-Pd(1)-P(1)-C(13)  | -173.86(18) |
| P(2)-Pd(1)-P(1)-C(13)  | 8.64(17)    |
| C(29)-Pd(1)-P(2)-C(23) | -65.82(16)  |
| O(2)-Pd(1)-P(2)-C(23)  | -44.7(4)    |
| P(1)-Pd(1)-P(2)-C(23)  | 120.58(13)  |
| C(29)-Pd(1)-P(2)-C(17) | 58.59(17)   |
| O(2)-Pd(1)-P(2)-C(17)  | 79.7(4)     |
| P(1)-Pd(1)-P(2)-C(17)  | -115.01(14) |
| C(29)-Pd(1)-P(2)-C(16) | 179.18(18)  |
| O(2)-Pd(1)-P(2)-C(16)  | -159.7(4)   |
| P(1)-Pd(1)-P(2)-C(16)  | 5.58(16)    |
| C(29)-Pd(1)-O(2)-C(33) | 68.4(2)     |
| P(2)-Pd(1)-O(2)-C(33)  | 47.4(5)     |
| P(1)-Pd(1)-O(2)-C(33)  | -118.2(2)   |
| C(7)-P(1)-C(1)-C(2)    | 140.4(3)    |
| C(13)-P(1)-C(1)-C(2)   | -113.1(3)   |
| Pd(1)-P(1)-C(1)-C(2)   | 21.6(4)     |
| C(7)-P(1)-C(1)-C(6)    | -44.1(4)    |
| C(13)-P(1)-C(1)-C(6)   | 62.3(4)     |
| Pd(1)-P(1)-C(1)-C(6)   | -162.9(3)   |
| C(6)-C(1)-C(2)-C(3)    | -1.2(6)     |
| P(1)-C(1)-C(2)-C(3)    | 174.3(3)    |
| C(1)-C(2)-C(3)-C(4)    | 1.1(6)      |
| C(2)-C(3)-C(4)-C(5)    | 0.4(7)      |
| C(3)-C(4)-C(5)-C(6)    | -1.8(7)     |
| C(4)-C(5)-C(6)-C(1)    | 1.7(7)      |
| C(2)-C(1)-C(6)-C(5)    | -0.2(6)     |
| P(1)-C(1)-C(6)-C(5)    | -175.6(4)   |
| C(1)-P(1)-C(7)-C(8)    | -33.5(4)    |
| C(13)-P(1)-C(7)-C(8)   | -139.0(4)   |
| Pd(1)-P(1)-C(7)-C(8)   | 91.9(4)     |
| C(1)-P(1)-C(7)-C(12)   | 151.3(3)    |
| C(13)-P(1)-C(7)-C(12)  | 45.9(4)     |
| Pd(1)-P(1)-C(7)-C(12)  | -83.3(3)    |
| C(12)-C(7)-C(8)-C(9)   | -2.6(7)     |

|                         |           |
|-------------------------|-----------|
| P(1)-C(7)-C(8)-C(9)     | -177.7(4) |
| C(7)-C(8)-C(9)-C(10)    | 1.1(9)    |
| C(8)-C(9)-C(10)-C(11)   | 0.9(10)   |
| C(9)-C(10)-C(11)-C(12)  | -1.4(9)   |
| C(10)-C(11)-C(12)-C(7)  | -0.1(8)   |
| C(8)-C(7)-C(12)-C(11)   | 2.1(7)    |
| P(1)-C(7)-C(12)-C(11)   | 177.4(4)  |
| C(7)-P(1)-C(13)-C(14)   | 172.5(3)  |
| C(1)-P(1)-C(13)-C(14)   | 63.2(3)   |
| Pd(1)-P(1)-C(13)-C(14)  | -68.6(3)  |
| P(1)-C(13)-C(14)-C(15)  | 53.7(4)   |
| C(13)-C(14)-C(15)-C(16) | 47.6(5)   |
| C(14)-C(15)-C(16)-P(2)  | -115.5(3) |
| C(23)-P(2)-C(16)-C(15)  | -72.3(3)  |
| C(17)-P(2)-C(16)-C(15)  | 175.5(3)  |
| Pd(1)-P(2)-C(16)-C(15)  | 49.7(3)   |
| C(23)-P(2)-C(17)-C(22)  | 18.6(4)   |
| C(16)-P(2)-C(17)-C(22)  | 124.1(4)  |
| Pd(1)-P(2)-C(17)-C(22)  | -107.9(3) |
| C(23)-P(2)-C(17)-C(18)  | -166.8(3) |
| C(16)-P(2)-C(17)-C(18)  | -61.3(4)  |
| Pd(1)-P(2)-C(17)-C(18)  | 66.7(3)   |
| C(22)-C(17)-C(18)-C(19) | -1.5(7)   |
| P(2)-C(17)-C(18)-C(19)  | -176.4(4) |
| C(17)-C(18)-C(19)-C(20) | 1.3(8)    |
| C(18)-C(19)-C(20)-C(21) | 0.0(8)    |
| C(19)-C(20)-C(21)-C(22) | -0.9(8)   |
| C(18)-C(17)-C(22)-C(21) | 0.6(7)    |
| P(2)-C(17)-C(22)-C(21)  | 175.0(4)  |
| C(20)-C(21)-C(22)-C(17) | 0.7(8)    |
| C(17)-P(2)-C(23)-C(28)  | -139.9(3) |
| C(16)-P(2)-C(23)-C(28)  | 112.1(3)  |
| Pd(1)-P(2)-C(23)-C(28)  | -13.0(3)  |
| C(17)-P(2)-C(23)-C(24)  | 48.1(4)   |
| C(16)-P(2)-C(23)-C(24)  | -59.9(4)  |
| Pd(1)-P(2)-C(23)-C(24)  | 175.0(3)  |
| C(28)-C(23)-C(24)-C(25) | 0.9(7)    |
| P(2)-C(23)-C(24)-C(25)  | 172.9(4)  |
| C(23)-C(24)-C(25)-C(26) | -0.7(8)   |
| C(24)-C(25)-C(26)-C(27) | -0.1(9)   |
| C(25)-C(26)-C(27)-C(28) | 0.5(8)    |
| C(24)-C(23)-C(28)-C(27) | -0.4(6)   |
| P(2)-C(23)-C(28)-C(27)  | -172.6(3) |
| C(26)-C(27)-C(28)-C(23) | -0.3(7)   |

|                             |              |
|-----------------------------|--------------|
| C (32)-Si (1)-C (29)-Pd (1) | 21.5 (3)     |
| C (30)-Si (1)-C (29)-Pd (1) | 141.8 (3)    |
| C (31)-Si (1)-C (29)-Pd (1) | -99.7 (2)    |
| O (2)-Pd (1)-C (29)-Si (1)  | 61.77 (16)   |
| P (2)-Pd (1)-C (29)-Si (1)  | -121.78 (16) |
| P (1)-Pd (1)-C (29)-Si (1)  | 12.0 (7)     |
| Pd (1)-O (2)-C (33)-O (1)   | 9.7 (4)      |
| Pd (1)-O (2)-C (33)-C (34)  | -169.7 (2)   |
| O (1)-C (33)-C (34)-C (35)  | 160.1 (4)    |
| O (2)-C (33)-C (34)-C (35)  | -20.5 (5)    |
| O (1)-C (33)-C (34)-C (38)  | -16.6 (5)    |
| O (2)-C (33)-C (34)-C (38)  | 162.8 (3)    |
| O (1)-C (33)-C (34)-Fe (1)  | 71.0 (4)     |
| O (2)-C (33)-C (34)-Fe (1)  | -109.6 (3)   |
| C (38)-Fe (1)-C (34)-C (35) | 119.0 (3)    |
| C (40)-Fe (1)-C (34)-C (35) | 155.4 (16)   |
| C (41)-Fe (1)-C (34)-C (35) | -60.3 (4)    |
| C (44)-Fe (1)-C (34)-C (35) | -178.4 (3)   |
| C (37)-Fe (1)-C (34)-C (35) | 81.0 (3)     |
| C (42)-Fe (1)-C (34)-C (35) | -96.7 (3)    |
| C (36)-Fe (1)-C (34)-C (35) | 37.3 (3)     |
| C (43)-Fe (1)-C (34)-C (35) | -140.2 (3)   |
| C (40)-Fe (1)-C (34)-C (38) | 36.4 (17)    |
| C (41)-Fe (1)-C (34)-C (38) | -179.3 (3)   |
| C (44)-Fe (1)-C (34)-C (38) | 62.7 (3)     |
| C (37)-Fe (1)-C (34)-C (38) | -38.0 (3)    |
| C (42)-Fe (1)-C (34)-C (38) | 144.3 (3)    |
| C (36)-Fe (1)-C (34)-C (38) | -81.7 (3)    |
| C (35)-Fe (1)-C (34)-C (38) | -119.0 (3)   |
| C (43)-Fe (1)-C (34)-C (38) | 100.8 (3)    |
| C (38)-Fe (1)-C (34)-C (33) | -120.6 (4)   |
| C (40)-Fe (1)-C (34)-C (33) | -84.1 (17)   |
| C (41)-Fe (1)-C (34)-C (33) | 60.1 (4)     |
| C (44)-Fe (1)-C (34)-C (33) | -57.9 (4)    |
| C (37)-Fe (1)-C (34)-C (33) | -158.6 (4)   |
| C (42)-Fe (1)-C (34)-C (33) | 23.8 (4)     |
| C (36)-Fe (1)-C (34)-C (33) | 157.8 (4)    |
| C (35)-Fe (1)-C (34)-C (33) | 120.5 (4)    |
| C (43)-Fe (1)-C (34)-C (33) | -19.7 (4)    |
| C (38)-C (34)-C (35)-C (36) | -0.3 (4)     |
| C (33)-C (34)-C (35)-C (36) | -177.5 (4)   |
| Fe (1)-C (34)-C (35)-C (36) | -59.3 (3)    |
| C (38)-C (34)-C (35)-Fe (1) | 59.0 (3)     |
| C (33)-C (34)-C (35)-Fe (1) | -118.2 (4)   |

|                                |             |
|--------------------------------|-------------|
| C (38) -Fe (1) -C (35) -C (36) | 81. 1 (3)   |
| C (40) -Fe (1) -C (35) -C (36) | -56. 8 (4)  |
| C (41) -Fe (1) -C (35) -C (36) | -95. 3 (3)  |
| C (44) -Fe (1) -C (35) -C (36) | 131. 5 (18) |
| C (34) -Fe (1) -C (35) -C (36) | 119. 3 (4)  |
| C (37) -Fe (1) -C (35) -C (36) | 37. 3 (3)   |
| C (42) -Fe (1) -C (35) -C (36) | -139. 7 (3) |
| C (43) -Fe (1) -C (35) -C (36) | -179. 7 (3) |
| C (38) -Fe (1) -C (35) -C (34) | -38. 2 (2)  |
| C (40) -Fe (1) -C (35) -C (34) | -176. 1 (3) |
| C (41) -Fe (1) -C (35) -C (34) | 145. 4 (2)  |
| C (44) -Fe (1) -C (35) -C (34) | 12 (2)      |
| C (37) -Fe (1) -C (35) -C (34) | -82. 0 (3)  |
| C (42) -Fe (1) -C (35) -C (34) | 101. 0 (3)  |
| C (36) -Fe (1) -C (35) -C (34) | -119. 3 (4) |
| C (43) -Fe (1) -C (35) -C (34) | 61. 0 (3)   |
| C (34) -C (35) -C (36) -C (37) | 0. 1 (5)    |
| Fe (1) -C (35) -C (36) -C (37) | -58. 7 (3)  |
| C (34) -C (35) -C (36) -Fe (1) | 58. 7 (3)   |
| C (38) -Fe (1) -C (36) -C (35) | -82. 3 (3)  |
| C (40) -Fe (1) -C (36) -C (35) | 147. 6 (3)  |
| C (41) -Fe (1) -C (36) -C (35) | 102. 9 (3)  |
| C (44) -Fe (1) -C (36) -C (35) | -173. 0 (3) |
| C (34) -Fe (1) -C (36) -C (35) | -37. 7 (3)  |
| C (37) -Fe (1) -C (36) -C (35) | -119. 9 (4) |
| C (42) -Fe (1) -C (36) -C (35) | 63. 3 (4)   |
| C (43) -Fe (1) -C (36) -C (35) | 3 (3)       |
| C (38) -Fe (1) -C (36) -C (37) | 37. 6 (2)   |
| C (40) -Fe (1) -C (36) -C (37) | -92. 5 (3)  |
| C (41) -Fe (1) -C (36) -C (37) | -137. 2 (2) |
| C (44) -Fe (1) -C (36) -C (37) | -53. 2 (4)  |
| C (34) -Fe (1) -C (36) -C (37) | 82. 2 (3)   |
| C (42) -Fe (1) -C (36) -C (37) | -176. 8 (2) |
| C (35) -Fe (1) -C (36) -C (37) | 119. 9 (4)  |
| C (43) -Fe (1) -C (36) -C (37) | 123 (3)     |
| C (35) -C (36) -C (37) -C (38) | 0. 2 (5)    |
| Fe (1) -C (36) -C (37) -C (38) | -59. 0 (3)  |
| C (35) -C (36) -C (37) -Fe (1) | 59. 2 (3)   |
| C (40) -Fe (1) -C (37) -C (38) | -135. 9 (3) |
| C (41) -Fe (1) -C (37) -C (38) | -174. 1 (3) |
| C (44) -Fe (1) -C (37) -C (38) | -91. 6 (3)  |
| C (34) -Fe (1) -C (37) -C (38) | 38. 5 (2)   |
| C (42) -Fe (1) -C (37) -C (38) | 169 (4)     |
| C (36) -Fe (1) -C (37) -C (38) | 119. 4 (4)  |



|                                |            |
|--------------------------------|------------|
| C (35) -Fe (1) -C (37) -C (38) | 82.4 (3)   |
| C (43) -Fe (1) -C (37) -C (38) | -55.8 (4)  |
| C (38) -Fe (1) -C (37) -C (36) | -119.4 (4) |
| C (40) -Fe (1) -C (37) -C (36) | 104.7 (3)  |
| C (41) -Fe (1) -C (37) -C (36) | 66.5 (3)   |
| C (44) -Fe (1) -C (37) -C (36) | 148.9 (2)  |
| C (34) -Fe (1) -C (37) -C (36) | -80.9 (3)  |
| C (42) -Fe (1) -C (37) -C (36) | 50 (4)     |
| C (35) -Fe (1) -C (37) -C (36) | -37.0 (2)  |
| C (43) -Fe (1) -C (37) -C (36) | -175.2 (3) |
| C (36) -C (37) -C (38) -C (34) | -0.4 (5)   |
| Fe (1) -C (37) -C (38) -C (34) | -60.1 (3)  |
| C (36) -C (37) -C (38) -Fe (1) | 59.8 (3)   |
| C (35) -C (34) -C (38) -C (37) | 0.4 (4)    |
| C (33) -C (34) -C (38) -C (37) | 177.6 (3)  |
| Fe (1) -C (34) -C (38) -C (37) | 60.4 (3)   |
| C (35) -C (34) -C (38) -Fe (1) | -60.0 (3)  |
| C (33) -C (34) -C (38) -Fe (1) | 117.2 (4)  |
| C (40) -Fe (1) -C (38) -C (37) | 66.1 (4)   |
| C (41) -Fe (1) -C (38) -C (37) | 57 (2)     |
| C (44) -Fe (1) -C (38) -C (37) | 103.8 (3)  |
| C (34) -Fe (1) -C (38) -C (37) | -118.4 (4) |
| C (42) -Fe (1) -C (38) -C (37) | -179.1 (3) |
| C (36) -Fe (1) -C (38) -C (37) | -37.4 (3)  |
| C (35) -Fe (1) -C (38) -C (37) | -80.7 (3)  |
| C (43) -Fe (1) -C (38) -C (37) | 146.4 (3)  |
| C (40) -Fe (1) -C (38) -C (34) | -175.5 (2) |
| C (41) -Fe (1) -C (38) -C (34) | 175 (2)    |
| C (44) -Fe (1) -C (38) -C (34) | -137.9 (2) |
| C (37) -Fe (1) -C (38) -C (34) | 118.4 (4)  |
| C (42) -Fe (1) -C (38) -C (34) | -60.8 (4)  |
| C (36) -Fe (1) -C (38) -C (34) | 80.9 (3)   |
| C (35) -Fe (1) -C (38) -C (34) | 37.7 (2)   |
| C (43) -Fe (1) -C (38) -C (34) | -95.2 (3)  |
| O (3) -C (39) -C (40) -C (41)  | 170.5 (4)  |
| O (4) -C (39) -C (40) -C (41)  | -10.0 (5)  |
| O (3) -C (39) -C (40) -C (44)  | -5.8 (6)   |
| O (4) -C (39) -C (40) -C (44)  | 173.7 (3)  |
| O (3) -C (39) -C (40) -Fe (1)  | 81.4 (5)   |
| O (4) -C (39) -C (40) -Fe (1)  | -99.1 (4)  |
| C (38) -Fe (1) -C (40) -C (41) | -178.8 (3) |
| C (44) -Fe (1) -C (40) -C (41) | 119.2 (3)  |
| C (34) -Fe (1) -C (40) -C (41) | 148.1 (16) |
| C (37) -Fe (1) -C (40) -C (41) | -139.5 (3) |

|                                |            |
|--------------------------------|------------|
| C (42) -Fe (1) -C (40) -C (41) | 38.0 (2)   |
| C (36) -Fe (1) -C (40) -C (41) | -95.9 (3)  |
| C (35) -Fe (1) -C (40) -C (41) | -59.6 (4)  |
| C (43) -Fe (1) -C (40) -C (41) | 81.8 (3)   |
| C (38) -Fe (1) -C (40) -C (44) | 62.0 (3)   |
| C (41) -Fe (1) -C (40) -C (44) | -119.2 (3) |
| C (34) -Fe (1) -C (40) -C (44) | 28.9 (17)  |
| C (37) -Fe (1) -C (40) -C (44) | 101.3 (3)  |
| C (42) -Fe (1) -C (40) -C (44) | -81.1 (3)  |
| C (36) -Fe (1) -C (40) -C (44) | 144.9 (3)  |
| C (35) -Fe (1) -C (40) -C (44) | -178.8 (3) |
| C (43) -Fe (1) -C (40) -C (44) | -37.4 (2)  |
| C (38) -Fe (1) -C (40) -C (39) | -56.6 (4)  |
| C (41) -Fe (1) -C (40) -C (39) | 122.2 (5)  |
| C (44) -Fe (1) -C (40) -C (39) | -118.6 (4) |
| C (34) -Fe (1) -C (40) -C (39) | -89.7 (17) |
| C (37) -Fe (1) -C (40) -C (39) | -17.3 (4)  |
| C (42) -Fe (1) -C (40) -C (39) | 160.2 (4)  |
| C (36) -Fe (1) -C (40) -C (39) | 26.2 (4)   |
| C (35) -Fe (1) -C (40) -C (39) | 62.6 (5)   |
| C (43) -Fe (1) -C (40) -C (39) | -156.0 (4) |
| C (44) -C (40) -C (41) -C (42) | -1.0 (4)   |
| C (39) -C (40) -C (41) -C (42) | -177.8 (4) |
| Fe (1) -C (40) -C (41) -C (42) | -60.3 (3)  |
| C (44) -C (40) -C (41) -Fe (1) | 59.3 (3)   |
| C (39) -C (40) -C (41) -Fe (1) | -117.5 (4) |
| C (38) -Fe (1) -C (41) -C (40) | 10 (2)     |
| C (44) -Fe (1) -C (41) -C (40) | -38.0 (2)  |
| C (34) -Fe (1) -C (41) -C (40) | -175.1 (3) |
| C (37) -Fe (1) -C (41) -C (40) | 62.7 (4)   |
| C (42) -Fe (1) -C (41) -C (40) | -118.6 (4) |
| C (36) -Fe (1) -C (41) -C (40) | 102.5 (3)  |
| C (35) -Fe (1) -C (41) -C (40) | 146.3 (2)  |
| C (43) -Fe (1) -C (41) -C (40) | -81.3 (3)  |
| C (38) -Fe (1) -C (41) -C (42) | 129 (2)    |
| C (40) -Fe (1) -C (41) -C (42) | 118.6 (4)  |
| C (44) -Fe (1) -C (41) -C (42) | 80.6 (3)   |
| C (34) -Fe (1) -C (41) -C (42) | -56.6 (4)  |
| C (37) -Fe (1) -C (41) -C (42) | -178.8 (3) |
| C (36) -Fe (1) -C (41) -C (42) | -138.9 (3) |
| C (35) -Fe (1) -C (41) -C (42) | -95.1 (3)  |
| C (43) -Fe (1) -C (41) -C (42) | 37.3 (2)   |
| C (40) -C (41) -C (42) -C (43) | 0.6 (5)    |
| Fe (1) -C (41) -C (42) -C (43) | -59.2 (3)  |

|                                |             |
|--------------------------------|-------------|
| C (40) -C (41) -C (42) -Fe (1) | 59. 7 (3)   |
| C (38) -Fe (1) -C (42) -C (41) | -173. 9 (3) |
| C (40) -Fe (1) -C (42) -C (41) | -38. 2 (2)  |
| C (44) -Fe (1) -C (42) -C (41) | -82. 7 (3)  |
| C (34) -Fe (1) -C (42) -C (41) | 147. 4 (2)  |
| C (37) -Fe (1) -C (42) -C (41) | 18 (4)      |
| C (36) -Fe (1) -C (42) -C (41) | 65. 0 (3)   |
| C (35) -Fe (1) -C (42) -C (41) | 103. 3 (3)  |
| C (43) -Fe (1) -C (42) -C (41) | -119. 8 (4) |
| C (38) -Fe (1) -C (42) -C (43) | -54. 0 (4)  |
| C (40) -Fe (1) -C (42) -C (43) | 81. 6 (3)   |
| C (41) -Fe (1) -C (42) -C (43) | 119. 8 (4)  |
| C (44) -Fe (1) -C (42) -C (43) | 37. 1 (2)   |
| C (34) -Fe (1) -C (42) -C (43) | -92. 8 (3)  |
| C (37) -Fe (1) -C (42) -C (43) | 137 (4)     |
| C (36) -Fe (1) -C (42) -C (43) | -175. 2 (3) |
| C (35) -Fe (1) -C (42) -C (43) | -136. 9 (2) |
| C (41) -C (42) -C (43) -C (44) | 0. 1 (5)    |
| Fe (1) -C (42) -C (43) -C (44) | -58. 3 (3)  |
| C (41) -C (42) -C (43) -Fe (1) | 58. 4 (3)   |
| C (38) -Fe (1) -C (43) -C (44) | -92. 5 (3)  |
| C (40) -Fe (1) -C (43) -C (44) | 38. 2 (2)   |
| C (41) -Fe (1) -C (43) -C (44) | 82. 3 (3)   |
| C (34) -Fe (1) -C (43) -C (44) | -136. 5 (2) |
| C (37) -Fe (1) -C (43) -C (44) | -57. 2 (4)  |
| C (42) -Fe (1) -C (43) -C (44) | 119. 8 (3)  |
| C (36) -Fe (1) -C (43) -C (44) | -176 (3)    |
| C (35) -Fe (1) -C (43) -C (44) | -173. 5 (3) |
| C (38) -Fe (1) -C (43) -C (42) | 147. 8 (2)  |
| C (40) -Fe (1) -C (43) -C (42) | -81. 5 (2)  |
| C (41) -Fe (1) -C (43) -C (42) | -37. 4 (2)  |
| C (44) -Fe (1) -C (43) -C (42) | -119. 8 (3) |
| C (34) -Fe (1) -C (43) -C (42) | 103. 7 (2)  |
| C (37) -Fe (1) -C (43) -C (42) | -176. 9 (3) |
| C (36) -Fe (1) -C (43) -C (42) | 64 (3)      |
| C (35) -Fe (1) -C (43) -C (42) | 66. 7 (3)   |
| C (42) -C (43) -C (44) -C (40) | -0. 7 (4)   |
| Fe (1) -C (43) -C (44) -C (40) | -59. 4 (3)  |
| C (42) -C (43) -C (44) -Fe (1) | 58. 6 (3)   |
| C (41) -C (40) -C (44) -C (43) | 1. 1 (4)    |
| C (39) -C (40) -C (44) -C (43) | 178. 0 (3)  |
| Fe (1) -C (40) -C (44) -C (43) | 60. 4 (3)   |
| C (41) -C (40) -C (44) -Fe (1) | -59. 3 (3)  |
| C (39) -C (40) -C (44) -Fe (1) | 117. 6 (4)  |

|                             |            |
|-----------------------------|------------|
| C (38)–Fe (1)–C (44)–C (43) | 102.5 (3)  |
| C (40)–Fe (1)–C (44)–C (43) | –119.1 (3) |
| C (41)–Fe (1)–C (44)–C (43) | –81.3 (3)  |
| C (34)–Fe (1)–C (44)–C (43) | 64.6 (3)   |
| C (37)–Fe (1)–C (44)–C (43) | 145.5 (2)  |
| C (42)–Fe (1)–C (44)–C (43) | –37.4 (2)  |
| C (36)–Fe (1)–C (44)–C (43) | 179.6 (3)  |
| C (35)–Fe (1)–C (44)–C (43) | 54 (2)     |
| C (38)–Fe (1)–C (44)–C (40) | –138.5 (2) |
| C (41)–Fe (1)–C (44)–C (40) | 37.7 (2)   |
| C (34)–Fe (1)–C (44)–C (40) | –176.3 (2) |
| C (37)–Fe (1)–C (44)–C (40) | –95.4 (3)  |
| C (42)–Fe (1)–C (44)–C (40) | 81.6 (2)   |
| C (36)–Fe (1)–C (44)–C (40) | –61.3 (4)  |
| C (35)–Fe (1)–C (44)–C (40) | 172.6 (18) |
| C (43)–Fe (1)–C (44)–C (40) | 119.1 (3)  |

---

Symmetry transformations used to generate equivalent atoms:

Table 7. Hydrogen bonds for **6c** [A and deg.].

---

| D–H...A            | d(D–H) | d(H...A) | d(D...A) | ∠(DHA) |
|--------------------|--------|----------|----------|--------|
| O(4)–H(4)...O(1)#1 | 0.84   | 1.73     | 2.529(4) | 159.2  |

---

Symmetry transformations used to generate equivalent atoms:

#1  $x+1/2, -y+1/2, -z+1$

### The X-ray structure of compound 6d

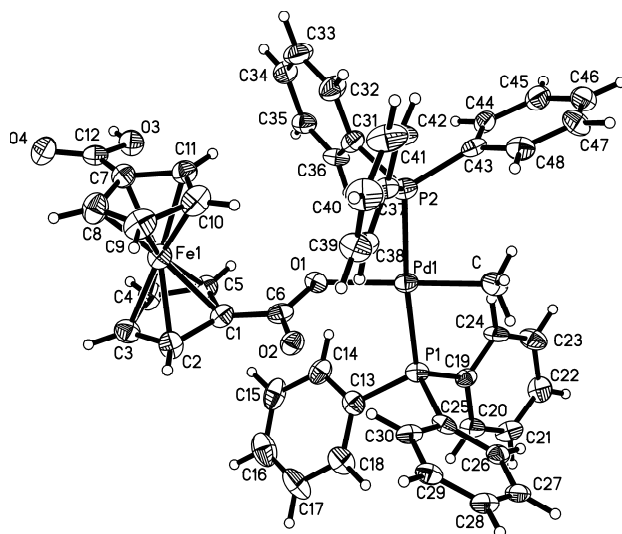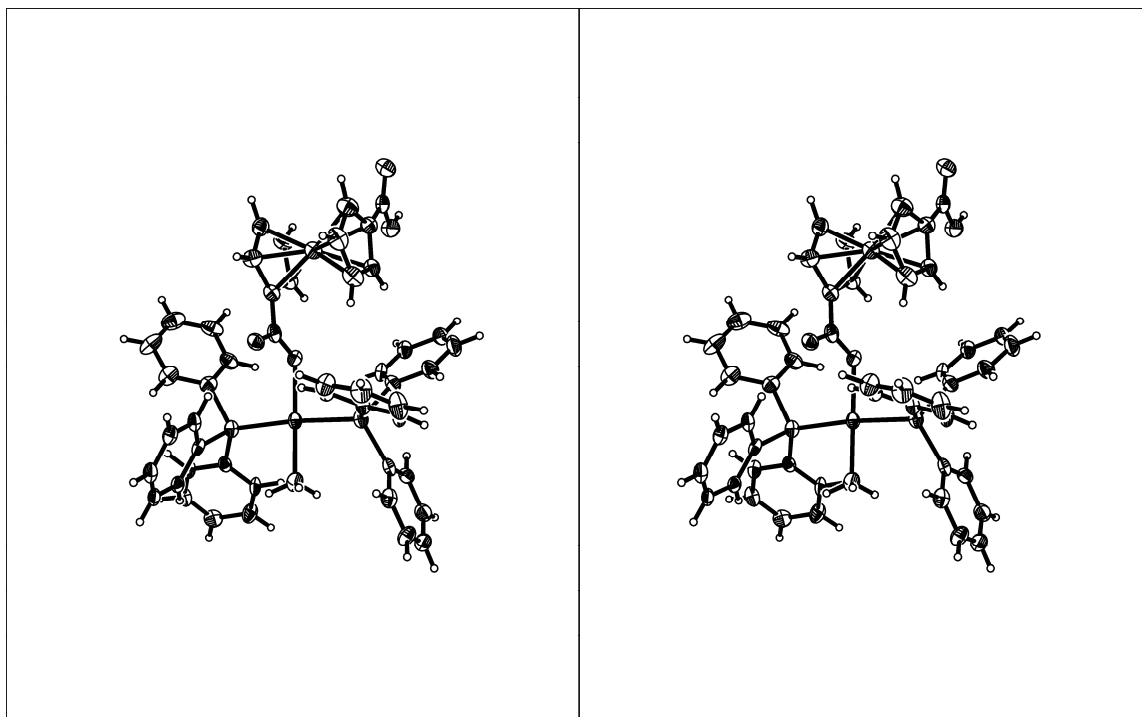

Table 1. Crystal data and structure refinement for **6d**.

|                                   |                                                                                                                      |
|-----------------------------------|----------------------------------------------------------------------------------------------------------------------|
| Identification code               | sa1599-b                                                                                                             |
| Empirical formula                 | C <sub>50</sub> H <sub>44</sub> Cl <sub>2</sub> Fe <sub>4</sub> P <sub>2</sub> Pd                                    |
| Formula weight                    | 1003.94                                                                                                              |
| Temperature                       | 173(2) K                                                                                                             |
| Wavelength                        | 0.71073 Å                                                                                                            |
| Crystal system, space group       | Monoclinic, P2(1)/c                                                                                                  |
| Unit cell dimensions              | a = 17.696(3) Å    alpha = 90 deg.<br>b = 13.606(3) Å    beta = 98.300(4) deg.<br>c = 18.782(4) Å    gamma = 90 deg. |
| Volume                            | 4474.8(16) Å <sup>3</sup>                                                                                            |
| Z, Calculated density             | 4, 1.490 Mg/m <sup>3</sup>                                                                                           |
| Absorption coefficient            | 0.962 mm <sup>-1</sup>                                                                                               |
| F(000)                            | 2048                                                                                                                 |
| Crystal size                      | 0.24 x 0.12 x 0.12 mm                                                                                                |
| Theta range for data collection   | 1.16 to 25.36 deg.                                                                                                   |
| Limiting indices                  | -21<=h<=14, -16<=k<=16, -21<=l<=22                                                                                   |
| Reflections collected / unique    | 23010 / 8138 [R(int) = 0.0882]                                                                                       |
| Completeness to theta = 25.36     | 99.3 %                                                                                                               |
| Absorption correction             | Semi-empirical from equivalents                                                                                      |
| Max. and min. transmission        | 0.8933 and 0.8020                                                                                                    |
| Refinement method                 | Full-matrix least-squares on F <sup>2</sup>                                                                          |
| Data / restraints / parameters    | 8138 / 0 / 543                                                                                                       |
| Goodness-of-fit on F <sup>2</sup> | 1.297                                                                                                                |
| Final R indices [I>2sigma(I)]     | R1 = 0.1347, wR2 = 0.1872                                                                                            |
| R indices (all data)              | R1 = 0.1629, wR2 = 0.1985                                                                                            |
| Largest diff. peak and hole       | 0.639 and -0.625 e.Å <sup>-3</sup>                                                                                   |

Table 2. Atomic coordinates ( $\times 10^4$ ) and equivalent isotropic displacement parameters ( $\text{\AA}^2 \times 10^3$ ) for **6d**.  
U(eq) is defined as one third of the trace of the orthogonalized Uij tensor.

|       | x       | y        | z       | U(eq)  |
|-------|---------|----------|---------|--------|
| Pd(1) | 2015(1) | 9778(1)  | 7783(1) | 41(1)  |
| Fe(1) | 5127(1) | 9916(1)  | 7296(1) | 51(1)  |
| Cl(1) | 2069(2) | 6553(3)  | 7790(3) | 111(2) |
| Cl(2) | 1193(4) | 4796(5)  | 7627(4) | 208(4) |
| P(1)  | 1340(2) | 9712(2)  | 6637(1) | 43(1)  |
| P(2)  | 2587(2) | 9883(2)  | 8982(2) | 45(1)  |
| O(1)  | 3082(4) | 9578(5)  | 7417(3) | 46(2)  |
| O(2)  | 3161(4) | 11120(5) | 7028(4) | 49(2)  |
| O(3)  | 6065(4) | 7741(5)  | 8075(5) | 61(2)  |
| O(4)  | 7096(5) | 8599(6)  | 7880(5) | 69(2)  |
| C(1)  | 4061(6) | 9931(7)  | 6751(6) | 45(3)  |
| C(2)  | 4545(6) | 10514(8) | 6383(6) | 58(3)  |
| C(3)  | 5131(7) | 9912(8)  | 6204(6) | 57(3)  |
| C(4)  | 5024(6) | 8958(8)  | 6444(6) | 58(3)  |
| C(5)  | 4364(6) | 8968(8)  | 6776(5) | 49(3)  |
| C(6)  | 3393(6) | 10253(8) | 7091(5) | 47(3)  |
| C(7)  | 5972(6) | 9454(8)  | 8068(6) | 51(3)  |
| C(8)  | 6136(7) | 10414(8) | 7831(7) | 69(4)  |
| C(9)  | 5532(8) | 11035(9) | 7963(7) | 68(4)  |
| C(10) | 4996(7) | 10465(9) | 8278(7) | 69(4)  |
| C(11) | 5259(6) | 9502(8)  | 8342(6) | 54(3)  |
| C(12) | 6435(7) | 8573(9)  | 7999(6) | 54(3)  |
| C(13) | 1903(6) | 9480(8)  | 5912(6) | 50(3)  |
| C(14) | 2430(6) | 8742(8)  | 5971(6) | 55(3)  |
| C(15) | 2854(7) | 8549(9)  | 5421(8) | 68(4)  |
| C(16) | 2703(9) | 9067(11) | 4784(8) | 84(5)  |
| C(17) | 2161(9) | 9780(10) | 4692(7) | 82(4)  |
| C(18) | 1769(7) | 9989(8)  | 5258(6) | 63(3)  |
| C(19) | 563(6)  | 8821(7)  | 6455(5) | 41(2)  |
| C(20) | 145(6)  | 8732(8)  | 5765(6) | 51(3)  |
| C(21) | -463(7) | 8115(7)  | 5642(6) | 54(3)  |
| C(22) | -682(7) | 7569(8)  | 6179(7) | 60(3)  |
| C(23) | -247(7) | 7592(8)  | 6863(6) | 63(3)  |
| C(24) | 364(6)  | 8219(8)  | 6984(5) | 50(3)  |
| C(25) | 879(6)  | 10896(7) | 6439(5) | 40(2)  |
| C(26) | 89(6)   | 11046(8) | 6286(5) | 44(3)  |
| C(27) | -198(7) | 11977(8) | 6186(5) | 49(3)  |

|        |          |           |           |         |
|--------|----------|-----------|-----------|---------|
| C (28) | 283 (7)  | 12775 (8) | 6235 (5)  | 52 (3)  |
| C (29) | 1056 (7) | 12656 (7) | 6373 (5)  | 48 (3)  |
| C (30) | 1362 (6) | 11720 (7) | 6476 (5)  | 47 (3)  |
| C (31) | 3389 (6) | 9045 (8)  | 9193 (6)  | 50 (3)  |
| C (32) | 3930 (7) | 9127 (9)  | 9808 (6)  | 61 (3)  |
| C (33) | 4491 (7) | 8430 (10) | 9969 (6)  | 71 (4)  |
| C (34) | 4519 (7) | 7626 (9)  | 9525 (6)  | 60 (3)  |
| C (35) | 3995 (6) | 7534 (8)  | 8915 (6)  | 51 (3)  |
| C (36) | 3444 (6) | 8247 (7)  | 8748 (5)  | 49 (3)  |
| C (37) | 2921 (6) | 11130 (7) | 9236 (5)  | 42 (3)  |
| C (38) | 2916 (6) | 11814 (7) | 8688 (6)  | 47 (3)  |
| C (39) | 3106 (7) | 12768 (8) | 8877 (7)  | 60 (3)  |
| C (40) | 3303 (7) | 13063 (8) | 9569 (7)  | 67 (4)  |
| C (41) | 3286 (8) | 12397 (8) | 10110 (7) | 75 (4)  |
| C (42) | 3089 (7) | 11436 (8) | 9964 (6)  | 67 (4)  |
| C (43) | 1970 (6) | 9544 (7)  | 9644 (5)  | 42 (2)  |
| C (44) | 1871 (6) | 8560 (8)  | 9792 (6)  | 47 (3)  |
| C (45) | 1338 (7) | 8257 (9)  | 10215 (6) | 60 (3)  |
| C (46) | 890 (7)  | 8945 (9)  | 10490 (6) | 63 (3)  |
| C (47) | 977 (7)  | 9911 (9)  | 10362 (6) | 59 (3)  |
| C (48) | 1510 (6) | 10208 (8) | 9930 (5)  | 53 (3)  |
| C (49) | 1708 (9) | 5533 (13) | 7292 (9)  | 122 (6) |
| C      | 990 (6)  | 9996 (8)  | 8135 (6)  | 60 (3)  |

---



Table 3. Bond lengths [Å] and angles [deg] for **6d**.

---

|             |           |
|-------------|-----------|
| Pd(1)–C     | 2.040(10) |
| Pd(1)–O(1)  | 2.120(7)  |
| Pd(1)–P(1)  | 2.308(3)  |
| Pd(1)–P(2)  | 2.336(3)  |
| Fe(1)–C(1)  | 2.012(10) |
| Fe(1)–C(5)  | 2.014(10) |
| Fe(1)–C(11) | 2.024(11) |
| Fe(1)–C(7)  | 2.027(11) |
| Fe(1)–C(10) | 2.034(13) |
| Fe(1)–C(8)  | 2.035(12) |
| Fe(1)–C(9)  | 2.035(11) |
| Fe(1)–C(2)  | 2.038(12) |
| Fe(1)–C(4)  | 2.051(11) |
| Fe(1)–C(3)  | 2.052(11) |
| Cl(1)–C(49) | 1.744(14) |
| Cl(2)–C(49) | 1.550(16) |
| P(1)–C(25)  | 1.821(10) |
| P(1)–C(19)  | 1.827(10) |
| P(1)–C(13)  | 1.827(11) |
| P(2)–C(31)  | 1.820(11) |
| P(2)–C(43)  | 1.828(11) |
| P(2)–C(37)  | 1.837(10) |
| O(1)–C(6)   | 1.271(12) |
| O(2)–C(6)   | 1.249(11) |
| O(3)–C(12)  | 1.326(13) |
| O(3)–H(3)   | 0.8400    |
| O(4)–C(12)  | 1.222(13) |
| C(1)–C(5)   | 1.414(13) |
| C(1)–C(2)   | 1.418(13) |
| C(1)–C(6)   | 1.487(14) |
| C(2)–C(3)   | 1.400(14) |
| C(2)–H(2)   | 0.9500    |
| C(3)–C(4)   | 1.396(14) |
| C(3)–H(3A)  | 0.9500    |
| C(4)–C(5)   | 1.400(14) |
| C(4)–H(4)   | 0.9500    |
| C(5)–H(5)   | 0.9500    |
| C(7)–C(8)   | 1.423(15) |
| C(7)–C(11)  | 1.431(14) |
| C(7)–C(12)  | 1.468(15) |
| C(8)–C(9)   | 1.413(16) |
| C(8)–H(8)   | 0.9500    |

|               |             |
|---------------|-------------|
| C (9)–C (10)  | 1. 418 (16) |
| C (9)–H (9)   | 0. 9500     |
| C (10)–C (11) | 1. 389 (14) |
| C (10)–H (10) | 0. 9500     |
| C (11)–H (11) | 0. 9500     |
| C (13)–C (14) | 1. 364 (14) |
| C (13)–C (18) | 1. 400 (15) |
| C (14)–C (15) | 1. 386 (15) |
| C (14)–H (14) | 0. 9500     |
| C (15)–C (16) | 1. 382 (18) |
| C (15)–H (15) | 0. 9500     |
| C (16)–C (17) | 1. 358 (18) |
| C (16)–H (16) | 0. 9500     |
| C (17)–C (18) | 1. 380 (15) |
| C (17)–H (17) | 0. 9500     |
| C (18)–H (18) | 0. 9500     |
| C (19)–C (24) | 1. 373 (13) |
| C (19)–C (20) | 1. 402 (13) |
| C (20)–C (21) | 1. 358 (14) |
| C (20)–H (20) | 0. 9500     |
| C (21)–C (22) | 1. 353 (14) |
| C (21)–H (21) | 0. 9500     |
| C (22)–C (23) | 1. 399 (15) |
| C (22)–H (22) | 0. 9500     |
| C (23)–C (24) | 1. 370 (14) |
| C (23)–H (23) | 0. 9500     |
| C (24)–H (24) | 0. 9500     |
| C (25)–C (26) | 1. 401 (13) |
| C (25)–C (30) | 1. 404 (13) |
| C (26)–C (27) | 1. 368 (13) |
| C (26)–H (26) | 0. 9500     |
| C (27)–C (28) | 1. 373 (14) |
| C (27)–H (27) | 0. 9500     |
| C (28)–C (29) | 1. 365 (14) |
| C (28)–H (28) | 0. 9500     |
| C (29)–C (30) | 1. 387 (13) |
| C (29)–H (29) | 0. 9500     |
| C (30)–H (30) | 0. 9500     |
| C (31)–C (36) | 1. 382 (14) |
| C (31)–C (32) | 1. 393 (14) |
| C (32)–C (33) | 1. 375 (15) |
| C (32)–H (32) | 0. 9500     |
| C (33)–C (34) | 1. 381 (15) |
| C (33)–H (33) | 0. 9500     |

|                     |              |
|---------------------|--------------|
| C (34)–C (35)       | 1. 372 (14)  |
| C (34)–H (34)       | 0. 9500      |
| C (35)–C (36)       | 1. 380 (14)  |
| C (35)–H (35)       | 0. 9500      |
| C (36)–H (36)       | 0. 9500      |
| C (37)–C (38)       | 1. 387 (13)  |
| C (37)–C (42)       | 1. 418 (14)  |
| C (38)–C (39)       | 1. 376 (13)  |
| C (38)–H (38)       | 0. 9500      |
| C (39)–C (40)       | 1. 356 (15)  |
| C (39)–H (39)       | 0. 9500      |
| C (40)–C (41)       | 1. 365 (16)  |
| C (40)–H (40)       | 0. 9500      |
| C (41)–C (42)       | 1. 372 (14)  |
| C (41)–H (41)       | 0. 9500      |
| C (42)–H (42)       | 0. 9500      |
| C (43)–C (48)       | 1. 377 (13)  |
| C (43)–C (44)       | 1. 383 (13)  |
| C (44)–C (45)       | 1. 381 (14)  |
| C (44)–H (44)       | 0. 9500      |
| C (45)–C (46)       | 1. 376 (15)  |
| C (45)–H (45)       | 0. 9500      |
| C (46)–C (47)       | 1. 349 (15)  |
| C (46)–H (46)       | 0. 9500      |
| C (47)–C (48)       | 1. 389 (14)  |
| C (47)–H (47)       | 0. 9500      |
| C (48)–H (48)       | 0. 9500      |
| C (49)–H (49A)      | 0. 9900      |
| C (49)–H (49B)      | 0. 9900      |
| C–HA                | 0. 9800      |
| C–HC                | 0. 9800      |
| C–HB                | 0. 9800      |
|                     |              |
| C–Pd (1)–O (1)      | 179. 0 (4)   |
| C–Pd (1)–P (1)      | 86. 8 (3)    |
| O (1)–Pd (1)–P (1)  | 93. 27 (19)  |
| C–Pd (1)–P (2)      | 87. 8 (3)    |
| O (1)–Pd (1)–P (2)  | 92. 2 (2)    |
| P (1)–Pd (1)–P (2)  | 174. 51 (11) |
| C (1)–Fe (1)–C (5)  | 41. 1 (4)    |
| C (1)–Fe (1)–C (11) | 117. 7 (4)   |
| C (5)–Fe (1)–C (11) | 105. 5 (4)   |
| C (1)–Fe (1)–C (7)  | 155. 2 (4)   |
| C (5)–Fe (1)–C (7)  | 121. 4 (4)   |

|                   |          |
|-------------------|----------|
| C(11)–Fe(1)–C(7)  | 41.4(4)  |
| C(1)–Fe(1)–C(10)  | 103.7(5) |
| C(5)–Fe(1)–C(10)  | 121.2(5) |
| C(11)–Fe(1)–C(10) | 40.0(4)  |
| C(7)–Fe(1)–C(10)  | 68.5(5)  |
| C(1)–Fe(1)–C(8)   | 160.0(4) |
| C(5)–Fe(1)–C(8)   | 158.6(5) |
| C(11)–Fe(1)–C(8)  | 69.1(5)  |
| C(7)–Fe(1)–C(8)   | 41.0(4)  |
| C(10)–Fe(1)–C(8)  | 68.7(5)  |
| C(1)–Fe(1)–C(9)   | 121.8(5) |
| C(5)–Fe(1)–C(9)   | 158.3(5) |
| C(11)–Fe(1)–C(9)  | 68.3(5)  |
| C(7)–Fe(1)–C(9)   | 68.5(5)  |
| C(10)–Fe(1)–C(9)  | 40.8(5)  |
| C(8)–Fe(1)–C(9)   | 40.6(4)  |
| C(1)–Fe(1)–C(2)   | 41.0(4)  |
| C(5)–Fe(1)–C(2)   | 68.0(4)  |
| C(11)–Fe(1)–C(2)  | 154.3(5) |
| C(7)–Fe(1)–C(2)   | 163.1(4) |
| C(10)–Fe(1)–C(2)  | 120.4(5) |
| C(8)–Fe(1)–C(2)   | 125.7(5) |
| C(9)–Fe(1)–C(2)   | 108.1(5) |
| C(1)–Fe(1)–C(4)   | 68.8(4)  |
| C(5)–Fe(1)–C(4)   | 40.3(4)  |
| C(11)–Fe(1)–C(4)  | 124.4(5) |
| C(7)–Fe(1)–C(4)   | 109.5(5) |
| C(10)–Fe(1)–C(4)  | 158.7(5) |
| C(8)–Fe(1)–C(4)   | 124.7(5) |
| C(9)–Fe(1)–C(4)   | 159.9(5) |
| C(2)–Fe(1)–C(4)   | 67.7(4)  |
| C(1)–Fe(1)–C(3)   | 68.3(4)  |
| C(5)–Fe(1)–C(3)   | 67.2(4)  |
| C(11)–Fe(1)–C(3)  | 162.3(4) |
| C(7)–Fe(1)–C(3)   | 127.3(5) |
| C(10)–Fe(1)–C(3)  | 157.6(5) |
| C(8)–Fe(1)–C(3)   | 111.4(5) |
| C(9)–Fe(1)–C(3)   | 124.5(5) |
| C(2)–Fe(1)–C(3)   | 40.0(4)  |
| C(4)–Fe(1)–C(3)   | 39.8(4)  |
| C(25)–P(1)–C(19)  | 104.2(5) |
| C(25)–P(1)–C(13)  | 106.1(5) |
| C(19)–P(1)–C(13)  | 102.9(5) |
| C(25)–P(1)–Pd(1)  | 108.2(3) |

|                  |           |
|------------------|-----------|
| C(19)-P(1)-Pd(1) | 118.3(3)  |
| C(13)-P(1)-Pd(1) | 116.0(4)  |
| C(31)-P(2)-C(43) | 102.5(5)  |
| C(31)-P(2)-C(37) | 108.1(5)  |
| C(43)-P(2)-C(37) | 104.9(5)  |
| C(31)-P(2)-Pd(1) | 112.8(4)  |
| C(43)-P(2)-Pd(1) | 115.0(3)  |
| C(37)-P(2)-Pd(1) | 112.7(3)  |
| C(6)-O(1)-Pd(1)  | 122.1(6)  |
| C(12)-O(3)-H(3)  | 109.5     |
| C(5)-C(1)-C(2)   | 106.3(9)  |
| C(5)-C(1)-C(6)   | 125.5(10) |
| C(2)-C(1)-C(6)   | 128.1(9)  |
| C(5)-C(1)-Fe(1)  | 69.5(6)   |
| C(2)-C(1)-Fe(1)  | 70.5(6)   |
| C(6)-C(1)-Fe(1)  | 122.0(7)  |
| C(3)-C(2)-C(1)   | 108.1(9)  |
| C(3)-C(2)-Fe(1)  | 70.6(7)   |
| C(1)-C(2)-Fe(1)  | 68.5(6)   |
| C(3)-C(2)-H(2)   | 126.0     |
| C(1)-C(2)-H(2)   | 126.0     |
| Fe(1)-C(2)-H(2)  | 126.5     |
| C(4)-C(3)-C(2)   | 109.0(10) |
| C(4)-C(3)-Fe(1)  | 70.1(6)   |
| C(2)-C(3)-Fe(1)  | 69.4(7)   |
| C(4)-C(3)-H(3A)  | 125.5     |
| C(2)-C(3)-H(3A)  | 125.5     |
| Fe(1)-C(3)-H(3A) | 126.6     |
| C(3)-C(4)-C(5)   | 107.2(10) |
| C(3)-C(4)-Fe(1)  | 70.2(6)   |
| C(5)-C(4)-Fe(1)  | 68.4(6)   |
| C(3)-C(4)-H(4)   | 126.4     |
| C(5)-C(4)-H(4)   | 126.4     |
| Fe(1)-C(4)-H(4)  | 126.6     |
| C(4)-C(5)-C(1)   | 109.3(10) |
| C(4)-C(5)-Fe(1)  | 71.3(6)   |
| C(1)-C(5)-Fe(1)  | 69.4(6)   |
| C(4)-C(5)-H(5)   | 125.3     |
| C(1)-C(5)-H(5)   | 125.3     |
| Fe(1)-C(5)-H(5)  | 125.6     |
| O(2)-C(6)-O(1)   | 124.6(10) |
| O(2)-C(6)-C(1)   | 120.6(10) |
| O(1)-C(6)-C(1)   | 114.8(9)  |
| C(8)-C(7)-C(11)  | 107.5(10) |

|                   |           |
|-------------------|-----------|
| C(8)-C(7)-C(12)   | 125.4(11) |
| C(11)-C(7)-C(12)  | 127.0(10) |
| C(8)-C(7)-Fe(1)   | 69.8(7)   |
| C(11)-C(7)-Fe(1)  | 69.2(6)   |
| C(12)-C(7)-Fe(1)  | 123.6(8)  |
| C(9)-C(8)-C(7)    | 107.5(11) |
| C(9)-C(8)-Fe(1)   | 69.7(7)   |
| C(7)-C(8)-Fe(1)   | 69.2(7)   |
| C(9)-C(8)-H(8)    | 126.3     |
| C(7)-C(8)-H(8)    | 126.3     |
| Fe(1)-C(8)-H(8)   | 126.4     |
| C(8)-C(9)-C(10)   | 108.3(11) |
| C(8)-C(9)-Fe(1)   | 69.7(7)   |
| C(10)-C(9)-Fe(1)  | 69.6(7)   |
| C(8)-C(9)-H(9)    | 125.8     |
| C(10)-C(9)-H(9)   | 125.8     |
| Fe(1)-C(9)-H(9)   | 126.5     |
| C(11)-C(10)-C(9)  | 108.4(11) |
| C(11)-C(10)-Fe(1) | 69.6(7)   |
| C(9)-C(10)-Fe(1)  | 69.6(7)   |
| C(11)-C(10)-H(10) | 125.8     |
| C(9)-C(10)-H(10)  | 125.8     |
| Fe(1)-C(10)-H(10) | 126.6     |
| C(10)-C(11)-C(7)  | 108.3(11) |
| C(10)-C(11)-Fe(1) | 70.4(7)   |
| C(7)-C(11)-Fe(1)  | 69.4(6)   |
| C(10)-C(11)-H(11) | 125.8     |
| C(7)-C(11)-H(11)  | 125.8     |
| Fe(1)-C(11)-H(11) | 125.9     |
| O(4)-C(12)-O(3)   | 123.0(11) |
| O(4)-C(12)-C(7)   | 123.6(11) |
| O(3)-C(12)-C(7)   | 113.4(10) |
| C(14)-C(13)-C(18) | 117.6(11) |
| C(14)-C(13)-P(1)  | 120.4(9)  |
| C(18)-C(13)-P(1)  | 121.7(9)  |
| C(13)-C(14)-C(15) | 121.0(12) |
| C(13)-C(14)-H(14) | 119.5     |
| C(15)-C(14)-H(14) | 119.5     |
| C(16)-C(15)-C(14) | 119.5(13) |
| C(16)-C(15)-H(15) | 120.3     |
| C(14)-C(15)-H(15) | 120.3     |
| C(17)-C(16)-C(15) | 121.2(13) |
| C(17)-C(16)-H(16) | 119.4     |
| C(15)-C(16)-H(16) | 119.4     |

|                   |           |
|-------------------|-----------|
| C(16)–C(17)–C(18) | 118.3(14) |
| C(16)–C(17)–H(17) | 120.8     |
| C(18)–C(17)–H(17) | 120.8     |
| C(17)–C(18)–C(13) | 122.1(12) |
| C(17)–C(18)–H(18) | 118.9     |
| C(13)–C(18)–H(18) | 118.9     |
| C(24)–C(19)–C(20) | 117.4(10) |
| C(24)–C(19)–P(1)  | 121.7(8)  |
| C(20)–C(19)–P(1)  | 120.9(8)  |
| C(21)–C(20)–C(19) | 120.7(10) |
| C(21)–C(20)–H(20) | 119.6     |
| C(19)–C(20)–H(20) | 119.6     |
| C(22)–C(21)–C(20) | 121.1(11) |
| C(22)–C(21)–H(21) | 119.4     |
| C(20)–C(21)–H(21) | 119.4     |
| C(21)–C(22)–C(23) | 119.6(11) |
| C(21)–C(22)–H(22) | 120.2     |
| C(23)–C(22)–H(22) | 120.2     |
| C(24)–C(23)–C(22) | 118.8(11) |
| C(24)–C(23)–H(23) | 120.6     |
| C(22)–C(23)–H(23) | 120.6     |
| C(23)–C(24)–C(19) | 122.1(10) |
| C(23)–C(24)–H(24) | 119.0     |
| C(19)–C(24)–H(24) | 119.0     |
| C(26)–C(25)–C(30) | 118.4(9)  |
| C(26)–C(25)–P(1)  | 125.1(8)  |
| C(30)–C(25)–P(1)  | 116.4(8)  |
| C(27)–C(26)–C(25) | 120.1(10) |
| C(27)–C(26)–H(26) | 119.9     |
| C(25)–C(26)–H(26) | 119.9     |
| C(26)–C(27)–C(28) | 120.6(11) |
| C(26)–C(27)–H(27) | 119.7     |
| C(28)–C(27)–H(27) | 119.7     |
| C(29)–C(28)–C(27) | 120.8(10) |
| C(29)–C(28)–H(28) | 119.6     |
| C(27)–C(28)–H(28) | 119.6     |
| C(28)–C(29)–C(30) | 119.7(11) |
| C(28)–C(29)–H(29) | 120.1     |
| C(30)–C(29)–H(29) | 120.1     |
| C(29)–C(30)–C(25) | 120.2(10) |
| C(29)–C(30)–H(30) | 119.9     |
| C(25)–C(30)–H(30) | 119.9     |
| C(36)–C(31)–C(32) | 117.7(10) |
| C(36)–C(31)–P(2)  | 118.7(9)  |

|                      |            |
|----------------------|------------|
| C (32)–C (31)–P (2)  | 123.4 (9)  |
| C (33)–C (32)–C (31) | 121.0 (11) |
| C (33)–C (32)–H (32) | 119.5      |
| C (31)–C (32)–H (32) | 119.5      |
| C (32)–C (33)–C (34) | 120.0 (12) |
| C (32)–C (33)–H (33) | 120.0      |
| C (34)–C (33)–H (33) | 120.0      |
| C (35)–C (34)–C (33) | 119.9 (11) |
| C (35)–C (34)–H (34) | 120.1      |
| C (33)–C (34)–H (34) | 120.1      |
| C (34)–C (35)–C (36) | 119.7 (11) |
| C (34)–C (35)–H (35) | 120.1      |
| C (36)–C (35)–H (35) | 120.1      |
| C (35)–C (36)–C (31) | 121.6 (10) |
| C (35)–C (36)–H (36) | 119.2      |
| C (31)–C (36)–H (36) | 119.2      |
| C (38)–C (37)–C (42) | 119.8 (10) |
| C (38)–C (37)–P (2)  | 117.3 (8)  |
| C (42)–C (37)–P (2)  | 122.4 (8)  |
| C (39)–C (38)–C (37) | 117.8 (10) |
| C (39)–C (38)–H (38) | 121.1      |
| C (37)–C (38)–H (38) | 121.1      |
| C (40)–C (39)–C (38) | 123.1 (11) |
| C (40)–C (39)–H (39) | 118.5      |
| C (38)–C (39)–H (39) | 118.5      |
| C (39)–C (40)–C (41) | 119.2 (11) |
| C (39)–C (40)–H (40) | 120.4      |
| C (41)–C (40)–H (40) | 120.4      |
| C (40)–C (41)–C (42) | 121.1 (12) |
| C (40)–C (41)–H (41) | 119.5      |
| C (42)–C (41)–H (41) | 119.5      |
| C (41)–C (42)–C (37) | 119.0 (11) |
| C (41)–C (42)–H (42) | 120.5      |
| C (37)–C (42)–H (42) | 120.5      |
| C (48)–C (43)–C (44) | 117.2 (10) |
| C (48)–C (43)–P (2)  | 123.0 (8)  |
| C (44)–C (43)–P (2)  | 119.1 (8)  |
| C (45)–C (44)–C (43) | 121.4 (10) |
| C (45)–C (44)–H (44) | 119.3      |
| C (43)–C (44)–H (44) | 119.3      |
| C (46)–C (45)–C (44) | 119.5 (11) |
| C (46)–C (45)–H (45) | 120.3      |
| C (44)–C (45)–H (45) | 120.3      |
| C (47)–C (46)–C (45) | 120.6 (11) |



|                     |           |
|---------------------|-----------|
| C(47)-C(46)-H(46)   | 119.7     |
| C(45)-C(46)-H(46)   | 119.7     |
| C(46)-C(47)-C(48)   | 119.5(11) |
| C(46)-C(47)-H(47)   | 120.2     |
| C(48)-C(47)-H(47)   | 120.2     |
| C(43)-C(48)-C(47)   | 121.7(10) |
| C(43)-C(48)-H(48)   | 119.1     |
| C(47)-C(48)-H(48)   | 119.1     |
| Cl(2)-C(49)-Cl(1)   | 119.2(10) |
| Cl(2)-C(49)-H(49A)  | 107.5     |
| Cl(1)-C(49)-H(49A)  | 107.5     |
| Cl(2)-C(49)-H(49B)  | 107.5     |
| Cl(1)-C(49)-H(49B)  | 107.5     |
| H(49A)-C(49)-H(49B) | 107.0     |
| Pd(1)-C-HA          | 109.5     |
| Pd(1)-C-HC          | 109.5     |
| HA-C-HC             | 109.5     |
| Pd(1)-C-HB          | 109.5     |
| HA-C-HB             | 109.5     |
| HC-C-HB             | 109.5     |

---

Symmetry transformations used to generate equivalent atoms:

Table 4. Anisotropic displacement parameters ( $\text{\AA}^2 \times 10^3$ ) for **6d**.

The anisotropic displacement factor exponent takes the form:

$$-2 \pi^2 [ h^2 a^{*2} U_{11} + \dots + 2 h k a^* b^* U_{12} ]$$

|       | U11     | U22    | U33    | U23     | U13    | U12     |
|-------|---------|--------|--------|---------|--------|---------|
| Pd(1) | 48(1)   | 36(1)  | 37(1)  | 0(1)    | -2(1)  | -2(1)   |
| Fe(1) | 51(1)   | 41(1)  | 59(1)  | -3(1)   | 5(1)   | -3(1)   |
| Cl(1) | 85(3)   | 106(3) | 142(4) | -36(3)  | 18(3)  | -11(3)  |
| Cl(2) | 183(6)  | 209(6) | 266(8) | -161(6) | 152(6) | -111(5) |
| P(1)  | 51(2)   | 38(1)  | 39(2)  | -1(1)   | 1(1)   | 0(1)    |
| P(2)  | 54(2)   | 35(1)  | 43(2)  | 0(1)    | -3(1)  | 1(1)    |
| O(1)  | 51(5)   | 48(4)  | 40(4)  | 4(3)    | 8(4)   | -1(4)   |
| O(2)  | 46(5)   | 44(4)  | 57(5)  | 1(4)    | 6(4)   | 8(4)    |
| O(3)  | 64(6)   | 44(4)  | 76(6)  | 9(4)    | 13(5)  | 4(4)    |
| O(4)  | 53(5)   | 65(5)  | 85(7)  | 1(5)    | 3(5)   | -1(5)   |
| C(1)  | 44(6)   | 33(5)  | 56(7)  | -3(5)   | -2(5)  | -3(5)   |
| C(2)  | 61(8)   | 43(6)  | 73(9)  | 1(6)    | 21(7)  | 4(6)    |
| C(3)  | 66(8)   | 51(7)  | 55(7)  | 6(6)    | 10(6)  | 4(6)    |
| C(4)  | 52(8)   | 55(7)  | 69(8)  | -20(6)  | 15(6)  | 15(6)   |
| C(5)  | 50(7)   | 50(6)  | 45(6)  | -8(5)   | 3(5)   | -9(6)   |
| C(6)  | 55(7)   | 46(6)  | 37(6)  | -5(5)   | -6(5)  | 5(6)    |
| C(7)  | 51(7)   | 51(7)  | 48(7)  | -9(5)   | 1(6)   | -12(6)  |
| C(8)  | 59(8)   | 57(8)  | 91(10) | -5(7)   | 7(7)   | -10(7)  |
| C(9)  | 78(10)  | 47(7)  | 73(9)  | -26(6)  | -10(7) | -9(7)   |
| C(10) | 66(9)   | 56(8)  | 84(10) | -14(7)  | 1(7)   | 5(7)    |
| C(11) | 55(7)   | 52(7)  | 52(7)  | 1(5)    | 1(6)   | -2(6)   |
| C(12) | 59(8)   | 66(8)  | 35(6)  | 0(6)    | -1(6)  | -1(7)   |
| C(13) | 53(7)   | 44(6)  | 54(7)  | -4(5)   | 9(6)   | -15(6)  |
| C(14) | 46(7)   | 54(7)  | 63(8)  | -13(6)  | -2(6)  | 0(6)    |
| C(15) | 47(8)   | 68(8)  | 88(10) | -36(8)  | 10(7)  | 4(7)    |
| C(16) | 90(12)  | 90(11) | 80(11) | -29(9)  | 37(9)  | -23(9)  |
| C(17) | 116(12) | 70(9)  | 73(9)  | 2(8)    | 53(9)  | -9(9)   |
| C(18) | 86(10)  | 42(7)  | 67(8)  | -4(6)   | 26(7)  | 0(6)    |
| C(19) | 43(6)   | 45(6)  | 33(6)  | -7(5)   | -1(5)  | 10(5)   |
| C(20) | 63(8)   | 49(6)  | 37(6)  | 5(5)    | -3(6)  | -5(6)   |
| C(21) | 64(8)   | 34(6)  | 57(7)  | -4(5)   | -16(6) | -3(6)   |
| C(22) | 55(8)   | 48(7)  | 75(9)  | -1(6)   | 3(7)   | -23(6)  |
| C(23) | 82(9)   | 65(8)  | 39(7)  | -3(6)   | 0(6)   | -23(7)  |
| C(24) | 63(8)   | 55(7)  | 27(6)  | 8(5)    | -7(5)  | -5(6)   |
| C(25) | 61(7)   | 36(5)  | 24(5)  | 0(4)    | 7(5)   | -11(5)  |
| C(26) | 46(7)   | 57(7)  | 28(5)  | 1(5)    | -2(5)  | -5(6)   |
| C(27) | 60(7)   | 53(7)  | 33(6)  | 12(5)   | 5(5)   | 15(6)   |
| C(28) | 69(8)   | 46(6)  | 38(6)  | 4(5)    | 2(6)   | 13(6)   |

|        |          |          |          |          |         |          |
|--------|----------|----------|----------|----------|---------|----------|
| C (29) | 67 (8)   | 38 (6)   | 39 (6)   | 4 (5)    | 8 (6)   | 1 (6)    |
| C (30) | 58 (7)   | 44 (6)   | 38 (6)   | 6 (5)    | -2 (5)  | 9 (6)    |
| C (31) | 41 (7)   | 53 (7)   | 52 (7)   | 2 (6)    | -3 (5)  | 0 (6)    |
| C (32) | 56 (8)   | 68 (8)   | 55 (8)   | -13 (6)  | -2 (6)  | 17 (7)   |
| C (33) | 65 (9)   | 95 (10)  | 46 (7)   | -3 (7)   | -12 (6) | 14 (8)   |
| C (34) | 54 (8)   | 63 (8)   | 61 (8)   | 16 (7)   | 5 (7)   | 12 (6)   |
| C (35) | 58 (8)   | 45 (6)   | 46 (7)   | 4 (5)    | 0 (6)   | -8 (6)   |
| C (36) | 66 (8)   | 47 (6)   | 30 (6)   | 7 (5)    | -2 (5)  | 1 (6)    |
| C (37) | 49 (7)   | 38 (6)   | 38 (6)   | 2 (5)    | -1 (5)  | 3 (5)    |
| C (38) | 50 (7)   | 40 (6)   | 49 (7)   | -2 (5)   | 5 (5)   | 7 (5)    |
| C (39) | 81 (9)   | 37 (6)   | 62 (8)   | 0 (6)    | 10 (7)  | -6 (6)   |
| C (40) | 91 (10)  | 33 (6)   | 74 (9)   | -11 (6)  | -1 (8)  | -13 (6)  |
| C (41) | 100 (11) | 46 (7)   | 69 (9)   | -9 (7)   | -25 (8) | -12 (7)  |
| C (42) | 98 (10)  | 55 (7)   | 42 (7)   | 0 (6)    | -15 (7) | 0 (7)    |
| C (43) | 42 (6)   | 40 (6)   | 39 (6)   | -1 (5)   | -12 (5) | 6 (5)    |
| C (44) | 38 (6)   | 52 (7)   | 51 (7)   | 1 (5)    | 1 (5)   | 1 (5)    |
| C (45) | 52 (8)   | 60 (8)   | 67 (8)   | 11 (6)   | 1 (7)   | 1 (6)    |
| C (46) | 61 (8)   | 79 (9)   | 49 (7)   | 8 (7)    | 8 (6)   | -7 (7)   |
| C (47) | 82 (9)   | 58 (7)   | 42 (6)   | -11 (6)  | 19 (6)  | 0 (7)    |
| C (48) | 65 (8)   | 46 (6)   | 44 (6)   | -8 (5)   | -4 (6)  | -10 (6)  |
| C (49) | 95 (12)  | 163 (17) | 101 (13) | -47 (12) | -9 (10) | -57 (12) |
| C      | 71 (8)   | 60 (7)   | 49 (7)   | 5 (6)    | 9 (6)   | 4 (7)    |

---

Table 5. Hydrogen coordinates ( $\times 10^4$ ) and isotropic displacement parameters ( $\text{Å}^2 \times 10^3$ ) for **6d**.

|       | x     | y     | z     | U(eq) |
|-------|-------|-------|-------|-------|
| H(3)  | 6361  | 7263  | 8049  | 92    |
| H(2)  | 4482  | 11194 | 6277  | 70    |
| H(3A) | 5536  | 10119 | 5958  | 69    |
| H(4)  | 5339  | 8406  | 6392  | 70    |
| H(5)  | 4154  | 8415  | 6986  | 58    |
| H(8)  | 6572  | 10602 | 7623  | 83    |
| H(9)  | 5491  | 11718 | 7859  | 82    |
| H(10) | 4536  | 10701 | 8422  | 83    |
| H(11) | 5008  | 8968  | 8534  | 64    |
| H(14) | 2509  | 8354  | 6396  | 66    |
| H(15) | 3245  | 8066  | 5482  | 81    |
| H(16) | 2983  | 8920  | 4402  | 101   |
| H(17) | 2054  | 10127 | 4250  | 99    |
| H(18) | 1395  | 10495 | 5203  | 76    |
| H(20) | 288   | 9107  | 5380  | 61    |
| H(21) | -739  | 8065  | 5171  | 65    |
| H(22) | -1128 | 7174  | 6092  | 72    |
| H(23) | -374  | 7180  | 7237  | 75    |
| H(24) | 659   | 8237  | 7449  | 60    |
| H(26) | -248  | 10499 | 6252  | 53    |
| H(27) | -734  | 12073 | 6081  | 58    |
| H(28) | 74    | 13417 | 6171  | 62    |
| H(29) | 1383  | 13212 | 6399  | 57    |
| H(30) | 1900  | 11635 | 6572  | 57    |
| H(32) | 3910  | 9673  | 10120 | 73    |
| H(33) | 4860  | 8502  | 10387 | 85    |
| H(34) | 4900  | 7137  | 9642  | 71    |
| H(35) | 4011  | 6981  | 8609  | 61    |
| H(36) | 3093  | 8189  | 8317  | 58    |
| H(38) | 2786  | 11629 | 8198  | 56    |
| H(39) | 3100  | 13244 | 8506  | 72    |
| H(40) | 3451  | 13724 | 9676  | 81    |
| H(41) | 3412  | 12603 | 10596 | 90    |
| H(42) | 3065  | 10981 | 10344 | 81    |
| H(44) | 2176  | 8083  | 9598  | 57    |
| H(45) | 1282  | 7579  | 10315 | 73    |
| H(46) | 516   | 8738  | 10774 | 76    |
| H(47) | 676   | 10385 | 10565 | 71    |
| H(48) | 1558  | 10888 | 9830  | 63    |

|        |      |       |      |     |
|--------|------|-------|------|-----|
| H(49A) | 1415 | 5778  | 6838 | 146 |
| H(49B) | 2149 | 5161  | 7161 | 146 |
| HA     | 581  | 9999  | 7722 | 90  |
| HC     | 997  | 10628 | 8386 | 90  |
| HB     | 899  | 9466  | 8465 | 90  |

---

Table 6. Torsion angles [deg] for **6d**.

|                       |           |
|-----------------------|-----------|
| C-Pd(1)-P(1)-C(25)    | 62.5(5)   |
| O(1)-Pd(1)-P(1)-C(25) | -116.5(4) |
| P(2)-Pd(1)-P(1)-C(25) | 57.5(11)  |
| C-Pd(1)-P(1)-C(19)    | -55.6(5)  |
| O(1)-Pd(1)-P(1)-C(19) | 125.4(4)  |
| P(2)-Pd(1)-P(1)-C(19) | -60.5(11) |
| C-Pd(1)-P(1)-C(13)    | -178.5(5) |
| O(1)-Pd(1)-P(1)-C(13) | 2.5(4)    |
| P(2)-Pd(1)-P(1)-C(13) | 176.5(10) |
| C-Pd(1)-P(2)-C(31)    | 143.2(5)  |
| O(1)-Pd(1)-P(2)-C(31) | -37.8(4)  |
| P(1)-Pd(1)-P(2)-C(31) | 148.2(10) |
| C-Pd(1)-P(2)-C(43)    | 26.1(5)   |
| O(1)-Pd(1)-P(2)-C(43) | -154.9(4) |
| P(1)-Pd(1)-P(2)-C(43) | 31.1(12)  |
| C-Pd(1)-P(2)-C(37)    | -94.0(5)  |
| O(1)-Pd(1)-P(2)-C(37) | 85.0(4)   |
| P(1)-Pd(1)-P(2)-C(37) | -89.1(11) |
| C-Pd(1)-O(1)-C(6)     | -19(21)   |
| P(1)-Pd(1)-O(1)-C(6)  | 72.8(7)   |
| P(2)-Pd(1)-O(1)-C(6)  | -106.6(7) |
| C(11)-Fe(1)-C(1)-C(5) | -81.9(7)  |
| C(7)-Fe(1)-C(1)-C(5)  | -54.0(12) |
| C(10)-Fe(1)-C(1)-C(5) | -122.2(7) |
| C(8)-Fe(1)-C(1)-C(5)  | 173.0(13) |
| C(9)-Fe(1)-C(1)-C(5)  | -162.2(7) |
| C(2)-Fe(1)-C(1)-C(5)  | 116.8(9)  |
| C(4)-Fe(1)-C(1)-C(5)  | 36.9(6)   |
| C(3)-Fe(1)-C(1)-C(5)  | 79.8(7)   |
| C(5)-Fe(1)-C(1)-C(2)  | -116.8(9) |
| C(11)-Fe(1)-C(1)-C(2) | 161.3(6)  |
| C(7)-Fe(1)-C(1)-C(2)  | -170.8(9) |
| C(10)-Fe(1)-C(1)-C(2) | 121.0(7)  |
| C(8)-Fe(1)-C(1)-C(2)  | 56.2(16)  |
| C(9)-Fe(1)-C(1)-C(2)  | 81.0(8)   |
| C(4)-Fe(1)-C(1)-C(2)  | -79.9(7)  |
| C(3)-Fe(1)-C(1)-C(2)  | -37.0(6)  |
| C(5)-Fe(1)-C(1)-C(6)  | 119.8(11) |
| C(11)-Fe(1)-C(1)-C(6) | 38.0(10)  |
| C(7)-Fe(1)-C(1)-C(6)  | 65.8(13)  |
| C(10)-Fe(1)-C(1)-C(6) | -2.4(9)   |
| C(8)-Fe(1)-C(1)-C(6)  | -67.2(17) |

|                           |              |
|---------------------------|--------------|
| C (9)–Fe (1)–C (1)–C (6)  | –42. 4 (10)  |
| C (2)–Fe (1)–C (1)–C (6)  | –123. 4 (11) |
| C (4)–Fe (1)–C (1)–C (6)  | 156. 7 (10)  |
| C (3)–Fe (1)–C (1)–C (6)  | –160. 4 (9)  |
| C (5)–C (1)–C (2)–C (3)   | –0. 9 (12)   |
| C (6)–C (1)–C (2)–C (3)   | 175. 6 (10)  |
| Fe (1)–C (1)–C (2)–C (3)  | 59. 7 (8)    |
| C (5)–C (1)–C (2)–Fe (1)  | –60. 6 (7)   |
| C (6)–C (1)–C (2)–Fe (1)  | 115. 9 (11)  |
| C (1)–Fe (1)–C (2)–C (3)  | –119. 5 (9)  |
| C (5)–Fe (1)–C (2)–C (3)  | –80. 2 (7)   |
| C (11)–Fe (1)–C (2)–C (3) | –160. 3 (9)  |
| C (7)–Fe (1)–C (2)–C (3)  | 47. 2 (17)   |
| C (10)–Fe (1)–C (2)–C (3) | 165. 4 (7)   |
| C (8)–Fe (1)–C (2)–C (3)  | 81. 0 (8)    |
| C (9)–Fe (1)–C (2)–C (3)  | 122. 5 (7)   |
| C (4)–Fe (1)–C (2)–C (3)  | –36. 6 (7)   |
| C (5)–Fe (1)–C (2)–C (1)  | 39. 3 (6)    |
| C (11)–Fe (1)–C (2)–C (1) | –40. 8 (13)  |
| C (7)–Fe (1)–C (2)–C (1)  | 166. 7 (13)  |
| C (10)–Fe (1)–C (2)–C (1) | –75. 0 (7)   |
| C (8)–Fe (1)–C (2)–C (1)  | –159. 5 (6)  |
| C (9)–Fe (1)–C (2)–C (1)  | –118. 0 (7)  |
| C (4)–Fe (1)–C (2)–C (1)  | 82. 9 (6)    |
| C (3)–Fe (1)–C (2)–C (1)  | 119. 5 (9)   |
| C (1)–C (2)–C (3)–C (4)   | 0. 6 (13)    |
| Fe (1)–C (2)–C (3)–C (4)  | 59. 0 (8)    |
| C (1)–C (2)–C (3)–Fe (1)  | –58. 4 (8)   |
| C (1)–Fe (1)–C (3)–C (4)  | –82. 5 (7)   |
| C (5)–Fe (1)–C (3)–C (4)  | –37. 9 (7)   |
| C (11)–Fe (1)–C (3)–C (4) | 30. 8 (18)   |
| C (7)–Fe (1)–C (3)–C (4)  | 75. 1 (8)    |
| C (10)–Fe (1)–C (3)–C (4) | –155. 1 (12) |
| C (8)–Fe (1)–C (3)–C (4)  | 119. 0 (7)   |
| C (9)–Fe (1)–C (3)–C (4)  | 163. 0 (7)   |
| C (2)–Fe (1)–C (3)–C (4)  | –120. 4 (10) |
| C (1)–Fe (1)–C (3)–C (2)  | 37. 9 (6)    |
| C (5)–Fe (1)–C (3)–C (2)  | 82. 5 (7)    |
| C (11)–Fe (1)–C (3)–C (2) | 151. 3 (14)  |
| C (7)–Fe (1)–C (3)–C (2)  | –164. 5 (6)  |
| C (10)–Fe (1)–C (3)–C (2) | –34. 7 (16)  |
| C (8)–Fe (1)–C (3)–C (2)  | –120. 5 (7)  |
| C (9)–Fe (1)–C (3)–C (2)  | –76. 5 (8)   |
| C (4)–Fe (1)–C (3)–C (2)  | 120. 4 (10)  |

|                           |             |
|---------------------------|-------------|
| C (2)–C (3)–C (4)–C (5)   | 0.0 (14)    |
| Fe (1)–C (3)–C (4)–C (5)  | 58.6 (8)    |
| C (2)–C (3)–C (4)–Fe (1)  | –58.6 (8)   |
| C (1)–Fe (1)–C (4)–C (3)  | 81.1 (7)    |
| C (5)–Fe (1)–C (4)–C (3)  | 118.7 (10)  |
| C (11)–Fe (1)–C (4)–C (3) | –169.1 (7)  |
| C (7)–Fe (1)–C (4)–C (3)  | –125.3 (7)  |
| C (10)–Fe (1)–C (4)–C (3) | 153.9 (12)  |
| C (8)–Fe (1)–C (4)–C (3)  | –82.1 (9)   |
| C (9)–Fe (1)–C (4)–C (3)  | –44.6 (17)  |
| C (2)–Fe (1)–C (4)–C (3)  | 36.8 (7)    |
| C (1)–Fe (1)–C (4)–C (5)  | –37.6 (6)   |
| C (11)–Fe (1)–C (4)–C (5) | 72.1 (8)    |
| C (7)–Fe (1)–C (4)–C (5)  | 115.9 (7)   |
| C (10)–Fe (1)–C (4)–C (5) | 35.1 (16)   |
| C (8)–Fe (1)–C (4)–C (5)  | 159.2 (7)   |
| C (9)–Fe (1)–C (4)–C (5)  | –163.4 (13) |
| C (2)–Fe (1)–C (4)–C (5)  | –81.9 (7)   |
| C (3)–Fe (1)–C (4)–C (5)  | –118.7 (10) |
| C (3)–C (4)–C (5)–C (1)   | –0.6 (13)   |
| Fe (1)–C (4)–C (5)–C (1)  | 59.1 (7)    |
| C (3)–C (4)–C (5)–Fe (1)  | –59.7 (8)   |
| C (2)–C (1)–C (5)–C (4)   | 0.9 (12)    |
| C (6)–C (1)–C (5)–C (4)   | –175.7 (10) |
| Fe (1)–C (1)–C (5)–C (4)  | –60.3 (8)   |
| C (2)–C (1)–C (5)–Fe (1)  | 61.2 (7)    |
| C (6)–C (1)–C (5)–Fe (1)  | –115.4 (10) |
| C (1)–Fe (1)–C (5)–C (4)  | 120.1 (10)  |
| C (11)–Fe (1)–C (5)–C (4) | –125.4 (7)  |
| C (7)–Fe (1)–C (5)–C (4)  | –83.4 (8)   |
| C (10)–Fe (1)–C (5)–C (4) | –165.9 (7)  |
| C (8)–Fe (1)–C (5)–C (4)  | –53.3 (16)  |
| C (9)–Fe (1)–C (5)–C (4)  | 164.6 (12)  |
| C (2)–Fe (1)–C (5)–C (4)  | 80.9 (7)    |
| C (3)–Fe (1)–C (5)–C (4)  | 37.5 (7)    |
| C (11)–Fe (1)–C (5)–C (1) | 114.5 (7)   |
| C (7)–Fe (1)–C (5)–C (1)  | 156.5 (6)   |
| C (10)–Fe (1)–C (5)–C (1) | 74.1 (8)    |
| C (8)–Fe (1)–C (5)–C (1)  | –173.4 (12) |
| C (9)–Fe (1)–C (5)–C (1)  | 44.5 (16)   |
| C (2)–Fe (1)–C (5)–C (1)  | –39.2 (6)   |
| C (4)–Fe (1)–C (5)–C (1)  | –120.1 (10) |
| C (3)–Fe (1)–C (5)–C (1)  | –82.6 (7)   |
| Pd (1)–O (1)–C (6)–O (2)  | 9.0 (14)    |



|                        |            |
|------------------------|------------|
| Pd(1)-O(1)-C(6)-C(1)   | -168.9(6)  |
| C(5)-C(1)-C(6)-O(2)    | -178.9(10) |
| C(2)-C(1)-C(6)-O(2)    | 5.2(17)    |
| Fe(1)-C(1)-C(6)-O(2)   | 94.6(11)   |
| C(5)-C(1)-C(6)-O(1)    | -0.9(15)   |
| C(2)-C(1)-C(6)-O(1)    | -176.8(10) |
| Fe(1)-C(1)-C(6)-O(1)   | -87.4(10)  |
| C(1)-Fe(1)-C(7)-C(8)   | -157.6(10) |
| C(5)-Fe(1)-C(7)-C(8)   | 163.8(7)   |
| C(11)-Fe(1)-C(7)-C(8)  | -118.9(10) |
| C(10)-Fe(1)-C(7)-C(8)  | -81.8(8)   |
| C(9)-Fe(1)-C(7)-C(8)   | -37.8(7)   |
| C(2)-Fe(1)-C(7)-C(8)   | 43.5(17)   |
| C(4)-Fe(1)-C(7)-C(8)   | 120.9(7)   |
| C(3)-Fe(1)-C(7)-C(8)   | 79.9(8)    |
| C(1)-Fe(1)-C(7)-C(11)  | -38.7(13)  |
| C(5)-Fe(1)-C(7)-C(11)  | -77.3(7)   |
| C(10)-Fe(1)-C(7)-C(11) | 37.1(6)    |
| C(8)-Fe(1)-C(7)-C(11)  | 118.9(10)  |
| C(9)-Fe(1)-C(7)-C(11)  | 81.1(7)    |
| C(2)-Fe(1)-C(7)-C(11)  | 162.4(13)  |
| C(4)-Fe(1)-C(7)-C(11)  | -120.3(7)  |
| C(3)-Fe(1)-C(7)-C(11)  | -161.3(6)  |
| C(1)-Fe(1)-C(7)-C(12)  | 82.7(14)   |
| C(5)-Fe(1)-C(7)-C(12)  | 44.1(11)   |
| C(11)-Fe(1)-C(7)-C(12) | 121.4(12)  |
| C(10)-Fe(1)-C(7)-C(12) | 158.4(11)  |
| C(8)-Fe(1)-C(7)-C(12)  | -119.8(13) |
| C(9)-Fe(1)-C(7)-C(12)  | -157.6(11) |
| C(2)-Fe(1)-C(7)-C(12)  | -76.3(18)  |
| C(4)-Fe(1)-C(7)-C(12)  | 1.1(11)    |
| C(3)-Fe(1)-C(7)-C(12)  | -39.9(12)  |
| C(11)-C(7)-C(8)-C(9)   | 0.3(13)    |
| C(12)-C(7)-C(8)-C(9)   | 177.0(10)  |
| Fe(1)-C(7)-C(8)-C(9)   | 59.4(8)    |
| C(11)-C(7)-C(8)-Fe(1)  | -59.1(8)   |
| C(12)-C(7)-C(8)-Fe(1)  | 117.5(11)  |
| C(1)-Fe(1)-C(8)-C(9)   | 33.2(18)   |
| C(5)-Fe(1)-C(8)-C(9)   | -159.6(12) |
| C(11)-Fe(1)-C(8)-C(9)  | -80.6(8)   |
| C(7)-Fe(1)-C(8)-C(9)   | -118.9(11) |
| C(10)-Fe(1)-C(8)-C(9)  | -37.5(7)   |
| C(2)-Fe(1)-C(8)-C(9)   | 75.4(9)    |
| C(4)-Fe(1)-C(8)-C(9)   | 161.3(8)   |

|                            |             |
|----------------------------|-------------|
| C (3)–Fe (1)–C (8)–C (9)   | 118.4 (8)   |
| C (1)–Fe (1)–C (8)–C (7)   | 152.1 (12)  |
| C (5)–Fe (1)–C (8)–C (7)   | –40.7 (16)  |
| C (11)–Fe (1)–C (8)–C (7)  | 38.3 (7)    |
| C (10)–Fe (1)–C (8)–C (7)  | 81.3 (7)    |
| C (9)–Fe (1)–C (8)–C (7)   | 118.9 (11)  |
| C (2)–Fe (1)–C (8)–C (7)   | –165.8 (6)  |
| C (4)–Fe (1)–C (8)–C (7)   | –79.8 (8)   |
| C (3)–Fe (1)–C (8)–C (7)   | –122.7 (7)  |
| C (7)–C (8)–C (9)–C (10)   | –0.1 (14)   |
| Fe (1)–C (8)–C (9)–C (10)  | 59.0 (9)    |
| C (7)–C (8)–C (9)–Fe (1)   | –59.1 (8)   |
| C (1)–Fe (1)–C (9)–C (8)   | –167.3 (7)  |
| C (5)–Fe (1)–C (9)–C (8)   | 159.9 (12)  |
| C (11)–Fe (1)–C (9)–C (8)  | 82.8 (8)    |
| C (7)–Fe (1)–C (9)–C (8)   | 38.1 (7)    |
| C (10)–Fe (1)–C (9)–C (8)  | 119.7 (11)  |
| C (2)–Fe (1)–C (9)–C (8)   | –124.3 (8)  |
| C (4)–Fe (1)–C (9)–C (8)   | –50.1 (18)  |
| C (3)–Fe (1)–C (9)–C (8)   | –83.2 (9)   |
| C (1)–Fe (1)–C (9)–C (10)  | 73.0 (9)    |
| C (5)–Fe (1)–C (9)–C (10)  | 40.2 (17)   |
| C (11)–Fe (1)–C (9)–C (10) | –36.9 (7)   |
| C (7)–Fe (1)–C (9)–C (10)  | –81.6 (8)   |
| C (8)–Fe (1)–C (9)–C (10)  | –119.7 (11) |
| C (2)–Fe (1)–C (9)–C (10)  | 116.0 (7)   |
| C (4)–Fe (1)–C (9)–C (10)  | –169.9 (13) |
| C (3)–Fe (1)–C (9)–C (10)  | 157.1 (7)   |
| C (8)–C (9)–C (10)–C (11)  | –0.1 (14)   |
| Fe (1)–C (9)–C (10)–C (11) | 58.9 (9)    |
| C (8)–C (9)–C (10)–Fe (1)  | –59.1 (9)   |
| C (1)–Fe (1)–C (10)–C (11) | 117.0 (7)   |
| C (5)–Fe (1)–C (10)–C (11) | 76.4 (8)    |
| C (7)–Fe (1)–C (10)–C (11) | –38.3 (7)   |
| C (8)–Fe (1)–C (10)–C (11) | –82.5 (8)   |
| C (9)–Fe (1)–C (10)–C (11) | –119.8 (11) |
| C (2)–Fe (1)–C (10)–C (11) | 157.7 (7)   |
| C (4)–Fe (1)–C (10)–C (11) | 50.6 (16)   |
| C (3)–Fe (1)–C (10)–C (11) | –177.2 (11) |
| C (1)–Fe (1)–C (10)–C (9)  | –123.2 (7)  |
| C (5)–Fe (1)–C (10)–C (9)  | –163.8 (7)  |
| C (11)–Fe (1)–C (10)–C (9) | 119.8 (11)  |
| C (7)–Fe (1)–C (10)–C (9)  | 81.6 (8)    |
| C (8)–Fe (1)–C (10)–C (9)  | 37.4 (7)    |

|                             |             |
|-----------------------------|-------------|
| C (2)–Fe (1)–C (10)–C (9)   | –82.5 (8)   |
| C (4)–Fe (1)–C (10)–C (9)   | 170.4 (12)  |
| C (3)–Fe (1)–C (10)–C (9)   | –57.3 (16)  |
| C (9)–C (10)–C (11)–C (7)   | 0.3 (14)    |
| Fe (1)–C (10)–C (11)–C (7)  | 59.3 (8)    |
| C (9)–C (10)–C (11)–Fe (1)  | –59.0 (9)   |
| C (8)–C (7)–C (11)–C (10)   | –0.4 (13)   |
| C (12)–C (7)–C (11)–C (10)  | –177.0 (11) |
| Fe (1)–C (7)–C (11)–C (10)  | –59.9 (8)   |
| C (8)–C (7)–C (11)–Fe (1)   | 59.5 (8)    |
| C (12)–C (7)–C (11)–Fe (1)  | –117.1 (11) |
| C (1)–Fe (1)–C (11)–C (10)  | –77.9 (8)   |
| C (5)–Fe (1)–C (11)–C (10)  | –120.4 (8)  |
| C (7)–Fe (1)–C (11)–C (10)  | 119.3 (10)  |
| C (8)–Fe (1)–C (11)–C (10)  | 81.4 (8)    |
| C (9)–Fe (1)–C (11)–C (10)  | 37.6 (7)    |
| C (2)–Fe (1)–C (11)–C (10)  | –49.0 (13)  |
| C (4)–Fe (1)–C (11)–C (10)  | –160.1 (7)  |
| C (3)–Fe (1)–C (11)–C (10)  | 176.5 (14)  |
| C (1)–Fe (1)–C (11)–C (7)   | 162.7 (6)   |
| C (5)–Fe (1)–C (11)–C (7)   | 120.2 (6)   |
| C (10)–Fe (1)–C (11)–C (7)  | –119.3 (10) |
| C (8)–Fe (1)–C (11)–C (7)   | –38.0 (6)   |
| C (9)–Fe (1)–C (11)–C (7)   | –81.7 (7)   |
| C (2)–Fe (1)–C (11)–C (7)   | –168.3 (9)  |
| C (4)–Fe (1)–C (11)–C (7)   | 80.6 (8)    |
| C (3)–Fe (1)–C (11)–C (7)   | 57.2 (17)   |
| C (8)–C (7)–C (12)–O (4)    | 17.1 (18)   |
| C (11)–C (7)–C (12)–O (4)   | –166.9 (11) |
| Fe (1)–C (7)–C (12)–O (4)   | 105.0 (12)  |
| C (8)–C (7)–C (12)–O (3)    | –162.5 (11) |
| C (11)–C (7)–C (12)–O (3)   | 13.5 (16)   |
| Fe (1)–C (7)–C (12)–O (3)   | –74.6 (12)  |
| C (25)–P (1)–C (13)–C (14)  | 167.5 (9)   |
| C (19)–P (1)–C (13)–C (14)  | –83.3 (9)   |
| Pd (1)–P (1)–C (13)–C (14)  | 47.4 (10)   |
| C (25)–P (1)–C (13)–C (18)  | –17.9 (10)  |
| C (19)–P (1)–C (13)–C (18)  | 91.3 (10)   |
| Pd (1)–P (1)–C (13)–C (18)  | –138.0 (8)  |
| C (18)–C (13)–C (14)–C (15) | 4.3 (16)    |
| P (1)–C (13)–C (14)–C (15)  | 179.1 (9)   |
| C (13)–C (14)–C (15)–C (16) | –4.6 (18)   |
| C (14)–C (15)–C (16)–C (17) | 2 (2)       |
| C (15)–C (16)–C (17)–C (18) | 1 (2)       |

|                             |              |
|-----------------------------|--------------|
| C (16)–C (17)–C (18)–C (13) | –1 (2)       |
| C (14)–C (13)–C (18)–C (17) | –1. 5 (18)   |
| P (1)–C (13)–C (18)–C (17)  | –176. 2 (10) |
| C (25)–P (1)–C (19)–C (24)  | –118. 5 (9)  |
| C (13)–P (1)–C (19)–C (24)  | 131. 0 (9)   |
| Pd (1)–P (1)–C (19)–C (24)  | 1. 7 (10)    |
| C (25)–P (1)–C (19)–C (20)  | 61. 3 (9)    |
| C (13)–P (1)–C (19)–C (20)  | –49. 3 (9)   |
| Pd (1)–P (1)–C (19)–C (20)  | –178. 5 (7)  |
| C (24)–C (19)–C (20)–C (21) | 4. 0 (15)    |
| P (1)–C (19)–C (20)–C (21)  | –175. 8 (8)  |
| C (19)–C (20)–C (21)–C (22) | 0. 0 (17)    |
| C (20)–C (21)–C (22)–C (23) | –4. 2 (18)   |
| C (21)–C (22)–C (23)–C (24) | 4. 3 (18)    |
| C (22)–C (23)–C (24)–C (19) | –0. 2 (18)   |
| C (20)–C (19)–C (24)–C (23) | –3. 8 (16)   |
| P (1)–C (19)–C (24)–C (23)  | 176. 0 (9)   |
| C (19)–P (1)–C (25)–C (26)  | 8. 1 (9)     |
| C (13)–P (1)–C (25)–C (26)  | 116. 3 (9)   |
| Pd (1)–P (1)–C (25)–C (26)  | –118. 6 (8)  |
| C (19)–P (1)–C (25)–C (30)  | –174. 9 (7)  |
| C (13)–P (1)–C (25)–C (30)  | –66. 6 (8)   |
| Pd (1)–P (1)–C (25)–C (30)  | 58. 4 (8)    |
| C (30)–C (25)–C (26)–C (27) | –0. 8 (14)   |
| P (1)–C (25)–C (26)–C (27)  | 176. 2 (7)   |
| C (25)–C (26)–C (27)–C (28) | –0. 2 (15)   |
| C (26)–C (27)–C (28)–C (29) | 1. 0 (15)    |
| C (27)–C (28)–C (29)–C (30) | –0. 9 (16)   |
| C (28)–C (29)–C (30)–C (25) | –0. 1 (15)   |
| C (26)–C (25)–C (30)–C (29) | 0. 9 (14)    |
| P (1)–C (25)–C (30)–C (29)  | –176. 3 (7)  |
| C (43)–P (2)–C (31)–C (36)  | 104. 2 (9)   |
| C (37)–P (2)–C (31)–C (36)  | –145. 3 (8)  |
| Pd (1)–P (2)–C (31)–C (36)  | –20. 0 (10)  |
| C (43)–P (2)–C (31)–C (32)  | –71. 6 (11)  |
| C (37)–P (2)–C (31)–C (32)  | 38. 9 (11)   |
| Pd (1)–P (2)–C (31)–C (32)  | 164. 2 (9)   |
| C (36)–C (31)–C (32)–C (33) | –0. 9 (18)   |
| P (2)–C (31)–C (32)–C (33)  | 175. 0 (9)   |
| C (31)–C (32)–C (33)–C (34) | –1. 0 (19)   |
| C (32)–C (33)–C (34)–C (35) | 1. 3 (19)    |
| C (33)–C (34)–C (35)–C (36) | 0. 1 (17)    |
| C (34)–C (35)–C (36)–C (31) | –2. 1 (16)   |
| C (32)–C (31)–C (36)–C (35) | 2. 4 (16)    |

|                             |              |
|-----------------------------|--------------|
| P (2)–C (31)–C (36)–C (35)  | –173. 7 (8)  |
| C (31)–P (2)–C (37)–C (38)  | 115. 3 (9)   |
| C (43)–P (2)–C (37)–C (38)  | –135. 9 (8)  |
| Pd (1)–P (2)–C (37)–C (38)  | –10. 1 (9)   |
| C (31)–P (2)–C (37)–C (42)  | –72. 5 (10)  |
| C (43)–P (2)–C (37)–C (42)  | 36. 4 (11)   |
| Pd (1)–P (2)–C (37)–C (42)  | 162. 1 (9)   |
| C (42)–C (37)–C (38)–C (39) | 2. 4 (16)    |
| P (2)–C (37)–C (38)–C (39)  | 174. 9 (8)   |
| C (37)–C (38)–C (39)–C (40) | 0. 7 (18)    |
| C (38)–C (39)–C (40)–C (41) | –3 (2)       |
| C (39)–C (40)–C (41)–C (42) | 1 (2)        |
| C (40)–C (41)–C (42)–C (37) | 2 (2)        |
| C (38)–C (37)–C (42)–C (41) | –3. 6 (18)   |
| P (2)–C (37)–C (42)–C (41)  | –175. 6 (10) |
| C (31)–P (2)–C (43)–C (48)  | 148. 1 (9)   |
| C (37)–P (2)–C (43)–C (48)  | 35. 2 (10)   |
| Pd (1)–P (2)–C (43)–C (48)  | –89. 1 (9)   |
| C (31)–P (2)–C (43)–C (44)  | –41. 6 (9)   |
| C (37)–P (2)–C (43)–C (44)  | –154. 4 (8)  |
| Pd (1)–P (2)–C (43)–C (44)  | 81. 2 (8)    |
| C (48)–C (43)–C (44)–C (45) | –0. 7 (15)   |
| P (2)–C (43)–C (44)–C (45)  | –171. 6 (9)  |
| C (43)–C (44)–C (45)–C (46) | 0. 7 (17)    |
| C (44)–C (45)–C (46)–C (47) | –1. 3 (18)   |
| C (45)–C (46)–C (47)–C (48) | 1. 8 (18)    |
| C (44)–C (43)–C (48)–C (47) | 1. 3 (15)    |
| P (2)–C (43)–C (48)–C (47)  | 171. 8 (8)   |
| C (46)–C (47)–C (48)–C (43) | –1. 9 (17)   |

Symmetry transformations used to generate equivalent atoms:

Table 7. Hydrogen bonds for **6d** [A and deg.].

| D–H...A            | d(D–H) | d(H...A) | d(D...A)  | <(DHA) |
|--------------------|--------|----------|-----------|--------|
| O(3)–H(3)...O(2)#1 | 0.84   | 1.79     | 2.617(10) | 169.8  |

Symmetry transformations used to generate equivalent atoms:

$$\#1 \quad -x+1, y-1/2, -z+3/2$$

### The X-ray structure of compound 7a

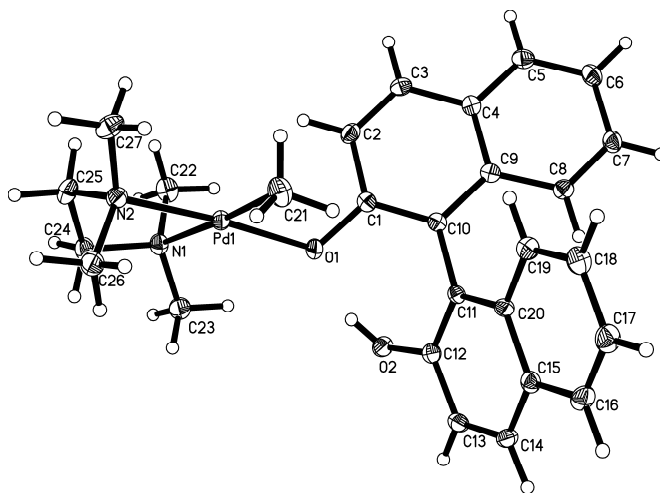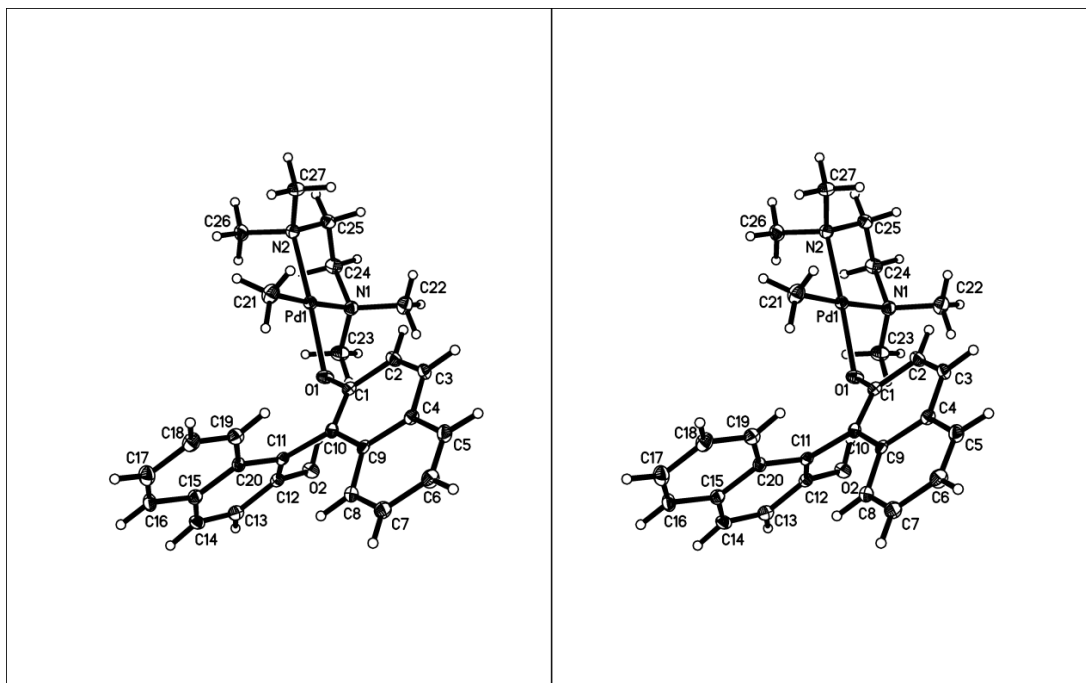

Table 1. Crystal data and structure refinement for **7a**.

|                                   |                                                                                                                                 |
|-----------------------------------|---------------------------------------------------------------------------------------------------------------------------------|
| Identification code               | a                                                                                                                               |
| Empirical formula                 | C <sub>28</sub> H <sub>34</sub> Cl <sub>2</sub> N <sub>2</sub> O <sub>2</sub> Pd                                                |
| Formula weight                    | 607.87                                                                                                                          |
| Temperature                       | 173(2) K                                                                                                                        |
| Wavelength                        | 0.71073 Å                                                                                                                       |
| Crystal system, space group       | Triclinic, P1                                                                                                                   |
| Unit cell dimensions              | a = 10.754(2) Å    alpha = 66.21(3) deg.<br>b = 11.776(2) Å    beta = 77.67(3) deg.<br>c = 12.101(2) Å    gamma = 89.24(3) deg. |
| Volume                            | 1365.4(5) Å <sup>3</sup>                                                                                                        |
| Z, Calculated density             | 2, 1.479 Mg/m <sup>3</sup>                                                                                                      |
| Absorption coefficient            | 0.903 mm <sup>-1</sup>                                                                                                          |
| F(000)                            | 624                                                                                                                             |
| Crystal size                      | 0.42 x 0.22 x 0.12 mm                                                                                                           |
| Theta range for data collection   | 1.94 to 27.49 deg.                                                                                                              |
| Limiting indices                  | -13<=h<=13, -15<=k<=15, -15<=l<=15                                                                                              |
| Reflections collected / unique    | 17486 / 11389 [R(int) = 0.0356]                                                                                                 |
| Completeness to theta = 27.49     | 99.8 %                                                                                                                          |
| Absorption correction             | Semi-empirical from equivalents                                                                                                 |
| Max. and min. transmission        | 1.0000 and 0.6389                                                                                                               |
| Refinement method                 | Full-matrix least-squares on F <sup>2</sup>                                                                                     |
| Data / restraints / parameters    | 11389 / 3 / 641                                                                                                                 |
| Goodness-of-fit on F <sup>2</sup> | 1.068                                                                                                                           |
| Final R indices [I>2sigma(I)]     | R1 = 0.0380, wR2 = 0.0855                                                                                                       |
| R indices (all data)              | R1 = 0.0391, wR2 = 0.0867                                                                                                       |
| Absolute structure parameter      | -0.030(19)                                                                                                                      |
| Largest diff. peak and hole       | 1.024 and -0.408 e.Å <sup>-3</sup>                                                                                              |

Table 2. Atomic coordinates ( $\times 10^4$ ) and equivalent isotropic displacement parameters ( $\text{\AA}^2 \times 10^3$ ) for **7a**.  
U(eq) is defined as one third of the trace of the orthogonalized Uij tensor.

|       | x        | y        | z        | U(eq) |
|-------|----------|----------|----------|-------|
| Pd(1) | 6763(1)  | 9764(1)  | 8056(1)  | 22(1) |
| Pd(2) | 2361(1)  | 9849(1)  | 5510(1)  | 22(1) |
| Cl(1) | 9617(2)  | 9992(2)  | -8(1)    | 61(1) |
| Cl(2) | 11984(2) | 9582(2)  | 845(1)   | 63(1) |
| Cl(3) | 6145(2)  | 9813(2)  | 3080(2)  | 68(1) |
| Cl(4) | 8849(1)  | 9763(1)  | 3079(1)  | 49(1) |
| O(1)  | 7365(3)  | 8287(2)  | 7647(2)  | 27(1) |
| O(2)  | 7464(3)  | 7219(3)  | 6135(3)  | 28(1) |
| O(3)  | 2771(3)  | 11357(2) | 5849(2)  | 26(1) |
| O(4)  | 2193(3)  | 12362(3) | 7385(3)  | 29(1) |
| N(1)  | 8045(3)  | 11139(3) | 6386(3)  | 26(1) |
| N(2)  | 6105(3)  | 11317(3) | 8339(3)  | 26(1) |
| N(3)  | 1849(3)  | 8263(3)  | 5313(3)  | 24(1) |
| N(4)  | 2936(3)  | 8537(3)  | 7167(3)  | 25(1) |
| C(1)  | 7846(3)  | 7344(3)  | 8469(3)  | 22(1) |
| C(2)  | 8740(4)  | 7614(4)  | 9055(4)  | 27(1) |
| C(3)  | 9328(4)  | 6694(4)  | 9830(4)  | 25(1) |
| C(4)  | 9068(3)  | 5439(4)  | 10053(3) | 23(1) |
| C(5)  | 9678(4)  | 4474(4)  | 10829(4) | 29(1) |
| C(6)  | 9382(4)  | 3252(4)  | 11097(4) | 31(1) |
| C(7)  | 8499(4)  | 2950(4)  | 10541(4) | 29(1) |
| C(8)  | 7902(4)  | 3859(4)  | 9768(4)  | 25(1) |
| C(9)  | 8128(3)  | 5141(4)  | 9509(3)  | 21(1) |
| C(10) | 7486(3)  | 6108(3)  | 8739(3)  | 20(1) |
| C(11) | 6461(4)  | 5801(4)  | 8222(4)  | 20(1) |
| C(12) | 6553(4)  | 6296(4)  | 6950(3)  | 23(1) |
| C(13) | 5694(4)  | 5860(4)  | 6432(4)  | 26(1) |
| C(14) | 4699(4)  | 5019(4)  | 7173(4)  | 27(1) |
| C(15) | 4464(4)  | 4600(4)  | 8477(4)  | 25(1) |
| C(16) | 3357(4)  | 3802(4)  | 9271(4)  | 31(1) |
| C(17) | 3127(4)  | 3419(4)  | 10532(4) | 34(1) |
| C(18) | 4002(4)  | 3805(4)  | 11051(4) | 31(1) |
| C(19) | 5062(4)  | 4573(4)  | 10320(4) | 28(1) |
| C(20) | 5346(4)  | 4989(3)  | 9004(4)  | 21(1) |
| C(21) | 5581(4)  | 8552(4)  | 9635(4)  | 37(1) |
| C(22) | 9359(4)  | 11129(4) | 6557(4)  | 36(1) |
| C(23) | 8040(5)  | 10917(4) | 5271(4)  | 35(1) |



|        |           |           |          |        |
|--------|-----------|-----------|----------|--------|
| C (24) | 7522 (4)  | 12349 (4) | 6250 (4) | 31 (1) |
| C (25) | 7082 (4)  | 12368 (4) | 7513 (4) | 31 (1) |
| C (26) | 4861 (4)  | 11570 (4) | 7970 (4) | 33 (1) |
| C (27) | 5919 (4)  | 11219 (4) | 9624 (4) | 35 (1) |
| C (28) | 3634 (4)  | 12274 (4) | 5021 (3) | 24 (1) |
| C (29) | 4786 (4)  | 11986 (4) | 4388 (4) | 29 (1) |
| C (30) | 5730 (4)  | 12882 (4) | 3616 (4) | 30 (1) |
| C (31) | 5606 (3)  | 14131 (4) | 3456 (3) | 22 (1) |
| C (32) | 6608 (4)  | 15074 (4) | 2698 (4) | 31 (1) |
| C (33) | 6482 (4)  | 16282 (4) | 2508 (4) | 34 (1) |
| C (34) | 5356 (4)  | 16602 (4) | 3113 (4) | 33 (1) |
| C (35) | 4376 (4)  | 15721 (4) | 3869 (3) | 24 (1) |
| C (36) | 4455 (3)  | 14454 (3) | 4043 (3) | 19 (1) |
| C (37) | 3431 (3)  | 13508 (3) | 4799 (3) | 20 (1) |
| C (38) | 2168 (4)  | 13849 (3) | 5334 (3) | 19 (1) |
| C (39) | 1645 (4)  | 13306 (3) | 6605 (4) | 22 (1) |
| C (40) | 534 (4)   | 13713 (4) | 7131 (4) | 29 (1) |
| C (41) | -127 (4)  | 14585 (4) | 6405 (4) | 28 (1) |
| C (42) | 285 (4)   | 15085 (4) | 5091 (4) | 25 (1) |
| C (43) | -427 (4)  | 15934 (4) | 4319 (4) | 33 (1) |
| C (44) | -7 (5)    | 16430 (4) | 3054 (4) | 36 (1) |
| C (45) | 1132 (4)  | 16066 (4) | 2523 (4) | 33 (1) |
| C (46) | 1827 (4)  | 15240 (4) | 3229 (4) | 26 (1) |
| C (47) | 1442 (4)  | 14715 (3) | 4555 (3) | 22 (1) |
| C (48) | 1876 (4)  | 11017 (4) | 3937 (4) | 34 (1) |
| C (49) | 2215 (4)  | 8318 (4)  | 4037 (4) | 34 (1) |
| C (50) | 437 (4)   | 7992 (4)  | 5762 (4) | 32 (1) |
| C (51) | 2501 (4)  | 7242 (4)  | 6110 (4) | 28 (1) |
| C (52) | 2410 (4)  | 7295 (4)  | 7359 (4) | 28 (1) |
| C (53) | 4348 (4)  | 8595 (4)  | 6927 (4) | 35 (1) |
| C (54) | 2442 (4)  | 8772 (4)  | 8278 (4) | 34 (1) |
| C (55) | 10953 (5) | 10673 (5) | 196 (5)  | 45 (1) |
| C (56) | 7468 (5)  | 8927 (5)  | 3215 (5) | 48 (1) |

---

Table 3. Bond lengths [Å] and angles [deg] for **7a**.

---

|             |          |
|-------------|----------|
| Pd(1)–C(21) | 2.028(4) |
| Pd(1)–O(1)  | 2.054(3) |
| Pd(1)–N(2)  | 2.081(3) |
| Pd(1)–N(1)  | 2.200(3) |
| Pd(2)–C(48) | 2.020(4) |
| Pd(2)–O(3)  | 2.050(3) |
| Pd(2)–N(3)  | 2.071(3) |
| Pd(2)–N(4)  | 2.190(3) |
| C1(1)–C(55) | 1.764(6) |
| C1(2)–C(55) | 1.736(6) |
| C1(3)–C(56) | 1.750(6) |
| C1(4)–C(56) | 1.734(5) |
| O(1)–C(1)   | 1.343(4) |
| O(2)–C(12)  | 1.365(5) |
| O(2)–H(2)   | 0.8399   |
| O(3)–C(28)  | 1.337(5) |
| O(4)–C(39)  | 1.359(5) |
| O(4)–H(4)   | 0.8401   |
| N(1)–C(22)  | 1.471(5) |
| N(1)–C(23)  | 1.475(5) |
| N(1)–C(24)  | 1.484(5) |
| N(2)–C(27)  | 1.480(5) |
| N(2)–C(26)  | 1.489(5) |
| N(2)–C(25)  | 1.491(5) |
| N(3)–C(51)  | 1.483(5) |
| N(3)–C(49)  | 1.484(5) |
| N(3)–C(50)  | 1.491(5) |
| N(4)–C(54)  | 1.470(5) |
| N(4)–C(53)  | 1.481(5) |
| N(4)–C(52)  | 1.484(5) |
| C(1)–C(10)  | 1.397(5) |
| C(1)–C(2)   | 1.418(5) |
| C(2)–C(3)   | 1.367(6) |
| C(2)–H(2A)  | 0.9500   |
| C(3)–C(4)   | 1.411(5) |
| C(3)–H(3)   | 0.9500   |
| C(4)–C(5)   | 1.410(5) |
| C(4)–C(9)   | 1.434(5) |
| C(5)–C(6)   | 1.367(6) |
| C(5)–H(5)   | 0.9500   |
| C(6)–C(7)   | 1.399(6) |
| C(6)–H(6)   | 0.9500   |

|                |            |
|----------------|------------|
| C (7)–C (8)    | 1. 366 (6) |
| C (7)–H (7)    | 0. 9500    |
| C (8)–C (9)    | 1. 425 (5) |
| C (8)–H (8)    | 0. 9500    |
| C (9)–C (10)   | 1. 428 (5) |
| C (10)–C (11)  | 1. 492 (5) |
| C (11)–C (12)  | 1. 389 (5) |
| C (11)–C (20)  | 1. 436 (5) |
| C (12)–C (13)  | 1. 425 (5) |
| C (13)–C (14)  | 1. 353 (6) |
| C (13)–H (13)  | 0. 9500    |
| C (14)–C (15)  | 1. 415 (6) |
| C (14)–H (14)  | 0. 9500    |
| C (15)–C (20)  | 1. 422 (5) |
| C (15)–C (16)  | 1. 427 (5) |
| C (16)–C (17)  | 1. 371 (6) |
| C (16)–H (16)  | 0. 9500    |
| C (17)–C (18)  | 1. 408 (6) |
| C (17)–H (17)  | 0. 9500    |
| C (18)–C (19)  | 1. 362 (5) |
| C (18)–H (18)  | 0. 9500    |
| C (19)–C (20)  | 1. 427 (5) |
| C (19)–H (19)  | 0. 9500    |
| C (21)–H (21A) | 0. 9800    |
| C (21)–H (21B) | 0. 9800    |
| C (21)–H (21C) | 0. 9800    |
| C (22)–H (22A) | 0. 9800    |
| C (22)–H (22C) | 0. 9800    |
| C (22)–H (22B) | 0. 9800    |
| C (23)–H (23B) | 0. 9800    |
| C (23)–H (23C) | 0. 9800    |
| C (23)–H (23A) | 0. 9800    |
| C (24)–C (25)  | 1. 509 (6) |
| C (24)–H (24A) | 0. 9900    |
| C (24)–H (24B) | 0. 9900    |
| C (25)–H (25B) | 0. 9900    |
| C (25)–H (25A) | 0. 9900    |
| C (26)–H (26A) | 0. 9800    |
| C (26)–H (26C) | 0. 9800    |
| C (26)–H (26B) | 0. 9800    |
| C (27)–H (27A) | 0. 9800    |
| C (27)–H (27C) | 0. 9800    |
| C (27)–H (27B) | 0. 9800    |
| C (28)–C (37)  | 1. 390 (5) |

|                |            |
|----------------|------------|
| C (28)–C (29)  | 1. 424 (5) |
| C (29)–C (30)  | 1. 358 (6) |
| C (29)–H (29)  | 0. 9500    |
| C (30)–C (31)  | 1. 413 (6) |
| C (30)–H (30)  | 0. 9500    |
| C (31)–C (36)  | 1. 417 (5) |
| C (31)–C (32)  | 1. 422 (5) |
| C (32)–C (33)  | 1. 357 (6) |
| C (32)–H (32)  | 0. 9500    |
| C (33)–C (34)  | 1. 405 (6) |
| C (33)–H (33)  | 0. 9500    |
| C (34)–C (35)  | 1. 370 (6) |
| C (34)–H (34)  | 0. 9500    |
| C (35)–C (36)  | 1. 425 (5) |
| C (35)–H (35)  | 0. 9500    |
| C (36)–C (37)  | 1. 439 (5) |
| C (37)–C (38)  | 1. 498 (5) |
| C (38)–C (39)  | 1. 392 (5) |
| C (38)–C (47)  | 1. 435 (5) |
| C (39)–C (40)  | 1. 403 (5) |
| C (40)–C (41)  | 1. 360 (6) |
| C (40)–H (40)  | 0. 9500    |
| C (41)–C (42)  | 1. 422 (6) |
| C (41)–H (41)  | 0. 9500    |
| C (42)–C (43)  | 1. 411 (6) |
| C (42)–C (47)  | 1. 424 (5) |
| C (43)–C (44)  | 1. 371 (6) |
| C (43)–H (43)  | 0. 9500    |
| C (44)–C (45)  | 1. 403 (6) |
| C (44)–H (44)  | 0. 9500    |
| C (45)–C (46)  | 1. 348 (6) |
| C (45)–H (45)  | 0. 9500    |
| C (46)–C (47)  | 1. 432 (5) |
| C (46)–H (46)  | 0. 9500    |
| C (48)–H (48B) | 0. 9800    |
| C (48)–H (48C) | 0. 9800    |
| C (48)–H (48A) | 0. 9800    |
| C (49)–H (49A) | 0. 9800    |
| C (49)–H (49C) | 0. 9800    |
| C (49)–H (49B) | 0. 9800    |
| C (50)–H (50B) | 0. 9800    |
| C (50)–H (50C) | 0. 9800    |
| C (50)–H (50A) | 0. 9800    |
| C (51)–C (52)  | 1. 521 (6) |

|                     |              |
|---------------------|--------------|
| C (51)–H (51B)      | 0. 9900      |
| C (51)–H (51A)      | 0. 9900      |
| C (52)–H (52A)      | 0. 9900      |
| C (52)–H (52B)      | 0. 9900      |
| C (53)–H (53B)      | 0. 9800      |
| C (53)–H (53C)      | 0. 9800      |
| C (53)–H (53A)      | 0. 9800      |
| C (54)–H (54A)      | 0. 9800      |
| C (54)–H (54C)      | 0. 9800      |
| C (54)–H (54B)      | 0. 9800      |
| C (55)–H (55A)      | 0. 9900      |
| C (55)–H (55B)      | 0. 9900      |
| C (56)–H (56B)      | 0. 9900      |
| C (56)–H (56A)      | 0. 9900      |
|                     |              |
| C (21)–Pd (1)–O (1) | 88. 99 (15)  |
| C (21)–Pd (1)–N (2) | 93. 30 (16)  |
| O (1)–Pd (1)–N (2)  | 175. 43 (12) |
| C (21)–Pd (1)–N (1) | 177. 30 (16) |
| O (1)–Pd (1)–N (1)  | 93. 46 (12)  |
| N (2)–Pd (1)–N (1)  | 84. 33 (13)  |
| C (48)–Pd (2)–O (3) | 89. 07 (15)  |
| C (48)–Pd (2)–N (3) | 93. 73 (16)  |
| O (3)–Pd (2)–N (3)  | 175. 30 (12) |
| C (48)–Pd (2)–N (4) | 177. 32 (16) |
| O (3)–Pd (2)–N (4)  | 92. 80 (12)  |
| N (3)–Pd (2)–N (4)  | 84. 52 (12)  |
| C (1)–O (1)–Pd (1)  | 119. 5 (2)   |
| C (12)–O (2)–H (2)  | 109. 4       |
| C (28)–O (3)–Pd (2) | 120. 6 (2)   |
| C (39)–O (4)–H (4)  | 109. 5       |
| C (22)–N (1)–C (23) | 109. 2 (3)   |
| C (22)–N (1)–C (24) | 110. 8 (3)   |
| C (23)–N (1)–C (24) | 109. 8 (3)   |
| C (22)–N (1)–Pd (1) | 110. 6 (3)   |
| C (23)–N (1)–Pd (1) | 112. 2 (3)   |
| C (24)–N (1)–Pd (1) | 104. 3 (2)   |
| C (27)–N (2)–C (26) | 107. 9 (3)   |
| C (27)–N (2)–C (25) | 108. 4 (3)   |
| C (26)–N (2)–C (25) | 110. 2 (3)   |
| C (27)–N (2)–Pd (1) | 115. 8 (3)   |
| C (26)–N (2)–Pd (1) | 108. 5 (2)   |
| C (25)–N (2)–Pd (1) | 106. 0 (2)   |
| C (51)–N (3)–C (49) | 107. 8 (3)   |

|                      |           |
|----------------------|-----------|
| C (51)–N (3)–C (50)  | 109.9 (3) |
| C (49)–N (3)–C (50)  | 108.5 (3) |
| C (51)–N (3)–Pd (2)  | 106.3 (2) |
| C (49)–N (3)–Pd (2)  | 115.8 (3) |
| C (50)–N (3)–Pd (2)  | 108.4 (2) |
| C (54)–N (4)–C (53)  | 108.8 (3) |
| C (54)–N (4)–C (52)  | 109.8 (3) |
| C (53)–N (4)–C (52)  | 110.5 (3) |
| C (54)–N (4)–Pd (2)  | 113.6 (3) |
| C (53)–N (4)–Pd (2)  | 109.3 (3) |
| C (52)–N (4)–Pd (2)  | 104.9 (2) |
| O (1)–C (1)–C (10)   | 120.8 (3) |
| O (1)–C (1)–C (2)    | 119.3 (3) |
| C (10)–C (1)–C (2)   | 120.0 (3) |
| C (3)–C (2)–C (1)    | 121.6 (4) |
| C (3)–C (2)–H (2A)   | 119.2     |
| C (1)–C (2)–H (2A)   | 119.2     |
| C (2)–C (3)–C (4)    | 120.3 (3) |
| C (2)–C (3)–H (3)    | 119.8     |
| C (4)–C (3)–H (3)    | 119.8     |
| C (5)–C (4)–C (3)    | 121.5 (4) |
| C (5)–C (4)–C (9)    | 119.5 (3) |
| C (3)–C (4)–C (9)    | 119.0 (3) |
| C (6)–C (5)–C (4)    | 121.6 (4) |
| C (6)–C (5)–H (5)    | 119.2     |
| C (4)–C (5)–H (5)    | 119.2     |
| C (5)–C (6)–C (7)    | 119.5 (4) |
| C (5)–C (6)–H (6)    | 120.3     |
| C (7)–C (6)–H (6)    | 120.3     |
| C (8)–C (7)–C (6)    | 120.6 (4) |
| C (8)–C (7)–H (7)    | 119.7     |
| C (6)–C (7)–H (7)    | 119.7     |
| C (7)–C (8)–C (9)    | 122.1 (4) |
| C (7)–C (8)–H (8)    | 119.0     |
| C (9)–C (8)–H (8)    | 119.0     |
| C (8)–C (9)–C (10)   | 123.3 (3) |
| C (8)–C (9)–C (4)    | 116.6 (3) |
| C (10)–C (9)–C (4)   | 120.1 (3) |
| C (1)–C (10)–C (9)   | 118.8 (3) |
| C (1)–C (10)–C (11)  | 120.7 (3) |
| C (9)–C (10)–C (11)  | 120.4 (3) |
| C (12)–C (11)–C (20) | 117.2 (3) |
| C (12)–C (11)–C (10) | 120.8 (3) |
| C (20)–C (11)–C (10) | 122.0 (3) |

|                     |          |
|---------------------|----------|
| O(2)-C(12)-C(11)    | 122.1(3) |
| O(2)-C(12)-C(13)    | 116.6(3) |
| C(11)-C(12)-C(13)   | 121.3(4) |
| C(14)-C(13)-C(12)   | 120.7(4) |
| C(14)-C(13)-H(13)   | 119.6    |
| C(12)-C(13)-H(13)   | 119.6    |
| C(13)-C(14)-C(15)   | 120.3(4) |
| C(13)-C(14)-H(14)   | 119.8    |
| C(15)-C(14)-H(14)   | 119.8    |
| C(14)-C(15)-C(20)   | 119.2(4) |
| C(14)-C(15)-C(16)   | 121.3(4) |
| C(20)-C(15)-C(16)   | 119.5(4) |
| C(17)-C(16)-C(15)   | 120.8(4) |
| C(17)-C(16)-H(16)   | 119.6    |
| C(15)-C(16)-H(16)   | 119.6    |
| C(16)-C(17)-C(18)   | 119.6(4) |
| C(16)-C(17)-H(17)   | 120.2    |
| C(18)-C(17)-H(17)   | 120.2    |
| C(19)-C(18)-C(17)   | 121.1(4) |
| C(19)-C(18)-H(18)   | 119.5    |
| C(17)-C(18)-H(18)   | 119.5    |
| C(18)-C(19)-C(20)   | 121.3(4) |
| C(18)-C(19)-H(19)   | 119.3    |
| C(20)-C(19)-H(19)   | 119.3    |
| C(15)-C(20)-C(19)   | 117.7(4) |
| C(15)-C(20)-C(11)   | 120.4(3) |
| C(19)-C(20)-C(11)   | 121.9(3) |
| Pd(1)-C(21)-H(21A)  | 109.5    |
| Pd(1)-C(21)-H(21B)  | 109.5    |
| H(21A)-C(21)-H(21B) | 109.5    |
| Pd(1)-C(21)-H(21C)  | 109.5    |
| H(21A)-C(21)-H(21C) | 109.5    |
| H(21B)-C(21)-H(21C) | 109.5    |
| N(1)-C(22)-H(22A)   | 109.5    |
| N(1)-C(22)-H(22C)   | 109.5    |
| H(22A)-C(22)-H(22C) | 109.5    |
| N(1)-C(22)-H(22B)   | 109.5    |
| H(22A)-C(22)-H(22B) | 109.5    |
| H(22C)-C(22)-H(22B) | 109.5    |
| N(1)-C(23)-H(23B)   | 109.5    |
| N(1)-C(23)-H(23C)   | 109.5    |
| H(23B)-C(23)-H(23C) | 109.5    |
| N(1)-C(23)-H(23A)   | 109.5    |
| H(23B)-C(23)-H(23A) | 109.5    |

|                          |            |
|--------------------------|------------|
| H (23C) –C (23) –H (23A) | 109. 5     |
| N (1) –C (24) –C (25)    | 109. 5 (3) |
| N (1) –C (24) –H (24A)   | 109. 8     |
| C (25) –C (24) –H (24A)  | 109. 8     |
| N (1) –C (24) –H (24B)   | 109. 8     |
| C (25) –C (24) –H (24B)  | 109. 8     |
| H (24A) –C (24) –H (24B) | 108. 2     |
| N (2) –C (25) –C (24)    | 111. 0 (3) |
| N (2) –C (25) –H (25B)   | 109. 4     |
| C (24) –C (25) –H (25B)  | 109. 4     |
| N (2) –C (25) –H (25A)   | 109. 4     |
| C (24) –C (25) –H (25A)  | 109. 4     |
| H (25B) –C (25) –H (25A) | 108. 0     |
| N (2) –C (26) –H (26A)   | 109. 5     |
| N (2) –C (26) –H (26C)   | 109. 5     |
| H (26A) –C (26) –H (26C) | 109. 5     |
| N (2) –C (26) –H (26B)   | 109. 5     |
| H (26A) –C (26) –H (26B) | 109. 5     |
| H (26C) –C (26) –H (26B) | 109. 5     |
| N (2) –C (27) –H (27A)   | 109. 5     |
| N (2) –C (27) –H (27C)   | 109. 5     |
| H (27A) –C (27) –H (27C) | 109. 5     |
| N (2) –C (27) –H (27B)   | 109. 5     |
| H (27A) –C (27) –H (27B) | 109. 5     |
| H (27C) –C (27) –H (27B) | 109. 5     |
| O (3) –C (28) –C (37)    | 120. 4 (3) |
| O (3) –C (28) –C (29)    | 119. 9 (3) |
| C (37) –C (28) –C (29)   | 119. 7 (3) |
| C (30) –C (29) –C (28)   | 121. 7 (4) |
| C (30) –C (29) –H (29)   | 119. 1     |
| C (28) –C (29) –H (29)   | 119. 1     |
| C (29) –C (30) –C (31)   | 120. 1 (4) |
| C (29) –C (30) –H (30)   | 119. 9     |
| C (31) –C (30) –H (30)   | 119. 9     |
| C (30) –C (31) –C (36)   | 119. 4 (3) |
| C (30) –C (31) –C (32)   | 121. 0 (4) |
| C (36) –C (31) –C (32)   | 119. 5 (4) |
| C (33) –C (32) –C (31)   | 121. 5 (4) |
| C (33) –C (32) –H (32)   | 119. 3     |
| C (31) –C (32) –H (32)   | 119. 3     |
| C (32) –C (33) –C (34)   | 119. 2 (4) |
| C (32) –C (33) –H (33)   | 120. 4     |
| C (34) –C (33) –H (33)   | 120. 4     |
| C (35) –C (34) –C (33)   | 121. 3 (4) |



|                        |            |
|------------------------|------------|
| C (35)–C (34)–H (34)   | 119. 4     |
| C (33)–C (34)–H (34)   | 119. 4     |
| C (34)–C (35)–C (36)   | 120. 8 (4) |
| C (34)–C (35)–H (35)   | 119. 6     |
| C (36)–C (35)–H (35)   | 119. 6     |
| C (31)–C (36)–C (35)   | 117. 6 (3) |
| C (31)–C (36)–C (37)   | 119. 9 (3) |
| C (35)–C (36)–C (37)   | 122. 5 (3) |
| C (28)–C (37)–C (36)   | 118. 8 (3) |
| C (28)–C (37)–C (38)   | 120. 7 (3) |
| C (36)–C (37)–C (38)   | 120. 5 (3) |
| C (39)–C (38)–C (47)   | 117. 8 (3) |
| C (39)–C (38)–C (37)   | 120. 9 (3) |
| C (47)–C (38)–C (37)   | 121. 3 (3) |
| O (4)–C (39)–C (38)    | 121. 3 (3) |
| O (4)–C (39)–C (40)    | 117. 4 (3) |
| C (38)–C (39)–C (40)   | 121. 3 (4) |
| C (41)–C (40)–C (39)   | 121. 0 (4) |
| C (41)–C (40)–H (40)   | 119. 5     |
| C (39)–C (40)–H (40)   | 119. 5     |
| C (40)–C (41)–C (42)   | 120. 3 (4) |
| C (40)–C (41)–H (41)   | 119. 8     |
| C (42)–C (41)–H (41)   | 119. 8     |
| C (43)–C (42)–C (41)   | 121. 3 (4) |
| C (43)–C (42)–C (47)   | 119. 9 (4) |
| C (41)–C (42)–C (47)   | 118. 8 (4) |
| C (44)–C (43)–C (42)   | 120. 8 (4) |
| C (44)–C (43)–H (43)   | 119. 6     |
| C (42)–C (43)–H (43)   | 119. 6     |
| C (43)–C (44)–C (45)   | 119. 4 (4) |
| C (43)–C (44)–H (44)   | 120. 3     |
| C (45)–C (44)–H (44)   | 120. 3     |
| C (46)–C (45)–C (44)   | 121. 5 (4) |
| C (46)–C (45)–H (45)   | 119. 3     |
| C (44)–C (45)–H (45)   | 119. 3     |
| C (45)–C (46)–C (47)   | 121. 2 (4) |
| C (45)–C (46)–H (46)   | 119. 4     |
| C (47)–C (46)–H (46)   | 119. 4     |
| C (42)–C (47)–C (46)   | 117. 2 (4) |
| C (42)–C (47)–C (38)   | 120. 2 (3) |
| C (46)–C (47)–C (38)   | 122. 7 (3) |
| Pd (2)–C (48)–H (48B)  | 109. 5     |
| Pd (2)–C (48)–H (48C)  | 109. 5     |
| H (48B)–C (48)–H (48C) | 109. 5     |

|                     |          |
|---------------------|----------|
| Pd(2)-C(48)-H(48A)  | 109.5    |
| H(48B)-C(48)-H(48A) | 109.5    |
| H(48C)-C(48)-H(48A) | 109.5    |
| N(3)-C(49)-H(49A)   | 109.5    |
| N(3)-C(49)-H(49C)   | 109.5    |
| H(49A)-C(49)-H(49C) | 109.5    |
| N(3)-C(49)-H(49B)   | 109.5    |
| H(49A)-C(49)-H(49B) | 109.5    |
| H(49C)-C(49)-H(49B) | 109.5    |
| N(3)-C(50)-H(50B)   | 109.5    |
| N(3)-C(50)-H(50C)   | 109.5    |
| H(50B)-C(50)-H(50C) | 109.5    |
| N(3)-C(50)-H(50A)   | 109.5    |
| H(50B)-C(50)-H(50A) | 109.5    |
| H(50C)-C(50)-H(50A) | 109.5    |
| N(3)-C(51)-C(52)    | 111.1(3) |
| N(3)-C(51)-H(51B)   | 109.4    |
| C(52)-C(51)-H(51B)  | 109.4    |
| N(3)-C(51)-H(51A)   | 109.4    |
| C(52)-C(51)-H(51A)  | 109.4    |
| H(51B)-C(51)-H(51A) | 108.0    |
| N(4)-C(52)-C(51)    | 109.6(3) |
| N(4)-C(52)-H(52A)   | 109.8    |
| C(51)-C(52)-H(52A)  | 109.8    |
| N(4)-C(52)-H(52B)   | 109.8    |
| C(51)-C(52)-H(52B)  | 109.8    |
| H(52A)-C(52)-H(52B) | 108.2    |
| N(4)-C(53)-H(53B)   | 109.5    |
| N(4)-C(53)-H(53C)   | 109.5    |
| H(53B)-C(53)-H(53C) | 109.5    |
| N(4)-C(53)-H(53A)   | 109.5    |
| H(53B)-C(53)-H(53A) | 109.5    |
| H(53C)-C(53)-H(53A) | 109.5    |
| N(4)-C(54)-H(54A)   | 109.5    |
| N(4)-C(54)-H(54C)   | 109.5    |
| H(54A)-C(54)-H(54C) | 109.5    |
| N(4)-C(54)-H(54B)   | 109.5    |
| H(54A)-C(54)-H(54B) | 109.5    |
| H(54C)-C(54)-H(54B) | 109.5    |
| C1(2)-C(55)-C1(1)   | 112.5(3) |
| C1(2)-C(55)-H(55A)  | 109.1    |
| C1(1)-C(55)-H(55A)  | 109.1    |
| C1(2)-C(55)-H(55B)  | 109.1    |
| C1(1)-C(55)-H(55B)  | 109.1    |

|                     |          |
|---------------------|----------|
| H(55A)-C(55)-H(55B) | 107.8    |
| C1(4)-C(56)-C1(3)   | 113.2(3) |
| C1(4)-C(56)-H(56B)  | 108.9    |
| C1(3)-C(56)-H(56B)  | 108.9    |
| C1(4)-C(56)-H(56A)  | 108.9    |
| C1(3)-C(56)-H(56A)  | 108.9    |
| H(56B)-C(56)-H(56A) | 107.8    |

---

Symmetry transformations used to generate equivalent atoms:

Table 4. Anisotropic displacement parameters ( $\text{\AA}^2 \times 10^3$ ) for **7a**.

The anisotropic displacement factor exponent takes the form:

$$-2 \pi^2 [ h^2 a^{*2} U_{11} + \dots + 2 h k a^* b^* U_{12} ]$$

|       | U11   | U22   | U33   | U23    | U13    | U12   |
|-------|-------|-------|-------|--------|--------|-------|
| Pd(1) | 22(1) | 20(1) | 25(1) | -9(1)  | -7(1)  | 2(1)  |
| Pd(2) | 22(1) | 19(1) | 24(1) | -9(1)  | -5(1)  | 3(1)  |
| Cl(1) | 71(1) | 75(1) | 51(1) | -40(1) | -15(1) | 2(1)  |
| Cl(2) | 74(1) | 73(1) | 36(1) | -17(1) | -12(1) | 18(1) |
| Cl(3) | 54(1) | 68(1) | 97(1) | -50(1) | -18(1) | 16(1) |
| Cl(4) | 54(1) | 59(1) | 35(1) | -19(1) | -8(1)  | -5(1) |
| O(1)  | 37(2) | 19(1) | 26(1) | -10(1) | -10(1) | 5(1)  |
| O(2)  | 32(2) | 28(2) | 23(1) | -9(1)  | -3(1)  | -4(1) |
| O(3)  | 30(2) | 19(1) | 29(1) | -12(1) | 1(1)   | -1(1) |
| O(4)  | 33(2) | 28(2) | 23(1) | -10(1) | -3(1)  | 7(1)  |
| N(1)  | 26(2) | 23(2) | 30(2) | -11(1) | -6(1)  | 4(1)  |
| N(2)  | 24(2) | 27(2) | 30(2) | -14(1) | -9(1)  | 5(1)  |
| N(3)  | 25(2) | 25(2) | 26(2) | -13(1) | -7(1)  | 4(1)  |
| N(4)  | 27(2) | 23(2) | 28(2) | -11(1) | -9(1)  | 1(1)  |
| C(1)  | 21(2) | 23(2) | 21(2) | -10(2) | -3(1)  | 5(2)  |
| C(2)  | 28(2) | 24(2) | 30(2) | -12(2) | -6(2)  | -3(2) |
| C(3)  | 21(2) | 31(2) | 28(2) | -15(2) | -9(2)  | 1(2)  |
| C(4)  | 20(2) | 23(2) | 23(2) | -9(2)  | -2(1)  | 2(2)  |
| C(5)  | 23(2) | 34(2) | 31(2) | -14(2) | -10(2) | 5(2)  |
| C(6)  | 32(2) | 27(2) | 33(2) | -9(2)  | -14(2) | 9(2)  |
| C(7)  | 29(2) | 23(2) | 34(2) | -10(2) | -10(2) | 6(2)  |
| C(8)  | 21(2) | 27(2) | 29(2) | -13(2) | -7(2)  | 4(2)  |
| C(9)  | 15(2) | 26(2) | 21(2) | -11(2) | -2(1)  | 5(1)  |
| C(10) | 17(2) | 22(2) | 18(2) | -6(2)  | -2(1)  | 0(1)  |
| C(11) | 18(2) | 19(2) | 25(2) | -10(2) | -8(2)  | 8(2)  |
| C(12) | 22(2) | 23(2) | 25(2) | -11(2) | -4(2)  | 5(2)  |
| C(13) | 30(2) | 27(2) | 23(2) | -11(2) | -10(2) | 8(2)  |
| C(14) | 30(2) | 27(2) | 34(2) | -18(2) | -16(2) | 7(2)  |
| C(15) | 23(2) | 22(2) | 29(2) | -10(2) | -7(2)  | 5(2)  |
| C(16) | 20(2) | 31(2) | 46(2) | -17(2) | -11(2) | 1(2)  |
| C(17) | 27(2) | 31(2) | 37(2) | -9(2)  | -4(2)  | -4(2) |
| C(18) | 28(2) | 31(2) | 27(2) | -8(2)  | 2(2)   | 1(2)  |
| C(19) | 27(2) | 28(2) | 28(2) | -12(2) | -6(2)  | 2(2)  |
| C(20) | 19(2) | 22(2) | 24(2) | -9(2)  | -9(1)  | 4(1)  |
| C(21) | 32(2) | 32(2) | 37(2) | -8(2)  | -2(2)  | 2(2)  |
| C(22) | 29(2) | 33(2) | 39(2) | -11(2) | -4(2)  | 3(2)  |
| C(23) | 46(3) | 32(2) | 30(2) | -14(2) | -11(2) | 5(2)  |
| C(24) | 38(2) | 21(2) | 30(2) | -7(2)  | -7(2)  | 1(2)  |

|        |        |        |        |         |         |         |
|--------|--------|--------|--------|---------|---------|---------|
| C (25) | 29 (2) | 26 (2) | 41 (2) | -18 (2) | -4 (2)  | -1 (2)  |
| C (26) | 28 (2) | 32 (2) | 47 (3) | -19 (2) | -16 (2) | 8 (2)   |
| C (27) | 35 (2) | 45 (3) | 35 (2) | -28 (2) | -4 (2)  | 3 (2)   |
| C (28) | 26 (2) | 23 (2) | 23 (2) | -11 (2) | -8 (2)  | 2 (2)   |
| C (29) | 31 (2) | 25 (2) | 29 (2) | -9 (2)  | -7 (2)  | 9 (2)   |
| C (30) | 24 (2) | 40 (2) | 28 (2) | -18 (2) | -2 (2)  | 6 (2)   |
| C (31) | 21 (2) | 29 (2) | 18 (2) | -10 (2) | -6 (1)  | 4 (2)   |
| C (32) | 23 (2) | 41 (2) | 28 (2) | -15 (2) | 1 (2)   | 0 (2)   |
| C (33) | 28 (2) | 40 (3) | 27 (2) | -9 (2)  | 0 (2)   | -11 (2) |
| C (34) | 38 (2) | 29 (2) | 29 (2) | -8 (2)  | -9 (2)  | -4 (2)  |
| C (35) | 21 (2) | 27 (2) | 23 (2) | -10 (2) | -4 (2)  | -1 (2)  |
| C (36) | 20 (2) | 24 (2) | 16 (2) | -9 (2)  | -6 (1)  | 0 (2)   |
| C (37) | 21 (2) | 23 (2) | 18 (2) | -9 (2)  | -5 (1)  | 3 (2)   |
| C (38) | 20 (2) | 17 (2) | 21 (2) | -9 (2)  | -4 (2)  | 2 (2)   |
| C (39) | 24 (2) | 21 (2) | 27 (2) | -14 (2) | -8 (2)  | 1 (2)   |
| C (40) | 28 (2) | 30 (2) | 27 (2) | -13 (2) | 1 (2)   | -5 (2)  |
| C (41) | 17 (2) | 26 (2) | 42 (2) | -19 (2) | 1 (2)   | 1 (2)   |
| C (42) | 23 (2) | 20 (2) | 36 (2) | -14 (2) | -8 (2)  | 2 (2)   |
| C (43) | 24 (2) | 33 (2) | 48 (3) | -23 (2) | -12 (2) | 10 (2)  |
| C (44) | 43 (3) | 34 (2) | 38 (2) | -17 (2) | -24 (2) | 15 (2)  |
| C (45) | 37 (2) | 36 (2) | 28 (2) | -11 (2) | -16 (2) | 5 (2)   |
| C (46) | 28 (2) | 27 (2) | 26 (2) | -14 (2) | -11 (2) | 6 (2)   |
| C (47) | 23 (2) | 22 (2) | 27 (2) | -14 (2) | -7 (2)  | 2 (2)   |
| C (48) | 38 (2) | 29 (2) | 29 (2) | -4 (2)  | -12 (2) | 5 (2)   |
| C (49) | 37 (2) | 38 (2) | 31 (2) | -19 (2) | -6 (2)  | 6 (2)   |
| C (50) | 22 (2) | 34 (2) | 41 (2) | -17 (2) | -7 (2)  | 2 (2)   |
| C (51) | 32 (2) | 21 (2) | 33 (2) | -13 (2) | -9 (2)  | 8 (2)   |
| C (52) | 35 (2) | 18 (2) | 29 (2) | -9 (2)  | -9 (2)  | 6 (2)   |
| C (53) | 27 (2) | 40 (2) | 42 (2) | -18 (2) | -16 (2) | 10 (2)  |
| C (54) | 38 (2) | 35 (2) | 29 (2) | -15 (2) | -7 (2)  | -2 (2)  |
| C (55) | 59 (3) | 35 (3) | 39 (3) | -16 (2) | -4 (2)  | -2 (3)  |
| C (56) | 56 (3) | 34 (3) | 48 (3) | -14 (2) | -10 (3) | 0 (2)   |

---

Table 5. Hydrogen coordinates ( $\times 10^4$ ) and isotropic displacement parameters ( $\text{\AA}^2 \times 10^3$ ) for **7a**.

|        | x     | y     | z     | U(eq) |
|--------|-------|-------|-------|-------|
| H(2)   | 7529  | 7755  | 6417  | 34    |
| H(4)   | 2474  | 11888 | 7041  | 34    |
| H(2A)  | 8936  | 8455  | 8906  | 32    |
| H(3)   | 9913  | 6899  | 10221 | 30    |
| H(5)   | 10311 | 4678  | 11175 | 34    |
| H(6)   | 9773  | 2614  | 11657 | 37    |
| H(7)   | 8313  | 2103  | 10703 | 34    |
| H(8)   | 7318  | 3631  | 9390  | 30    |
| H(13)  | 5822  | 6162  | 5557  | 31    |
| H(14)  | 4155  | 4709  | 6816  | 33    |
| H(16)  | 2773  | 3532  | 8921  | 38    |
| H(17)  | 2381  | 2897  | 11052 | 41    |
| H(18)  | 3849  | 3524  | 11927 | 38    |
| H(19)  | 5625  | 4838  | 10693 | 33    |
| H(21A) | 5552  | 7727  | 9620  | 55    |
| H(21B) | 4722  | 8842  | 9695  | 55    |
| H(21C) | 5900  | 8501  | 10353 | 55    |
| H(22A) | 9690  | 10327 | 6636  | 53    |
| H(22C) | 9365  | 11252 | 7310  | 53    |
| H(22B) | 9900  | 11801 | 5839  | 53    |
| H(23B) | 8321  | 10089 | 5393  | 53    |
| H(23C) | 8621  | 11549 | 4551  | 53    |
| H(23A) | 7174  | 10966 | 5128  | 53    |
| H(24A) | 6795  | 12466 | 5842  | 37    |
| H(24B) | 8188  | 13038 | 5724  | 37    |
| H(25B) | 7823  | 12306 | 7893  | 38    |
| H(25A) | 6714  | 13167 | 7422  | 38    |
| H(26A) | 4947  | 11591 | 7139  | 50    |
| H(26C) | 4609  | 12374 | 7964  | 50    |
| H(26B) | 4208  | 10910 | 8563  | 50    |
| H(27A) | 5274  | 10535 | 10179 | 53    |
| H(27C) | 5633  | 12001 | 9655  | 53    |
| H(27B) | 6728  | 11056 | 9888  | 53    |
| H(29)  | 4897  | 11146 | 4510  | 35    |
| H(30)  | 6475  | 12669 | 3182  | 36    |
| H(32)  | 7383  | 14852 | 2318  | 37    |
| H(33)  | 7147  | 16905 | 1971  | 41    |
| H(34)  | 5274  | 17444 | 2996  | 40    |
| H(35)  | 3633  | 15959 | 4282  | 29    |

|        |       |       |      |    |
|--------|-------|-------|------|----|
| H(40)  | 238   | 13374 | 8007 | 35 |
| H(41)  | -868  | 14862 | 6778 | 33 |
| H(43)  | -1208 | 16165 | 4680 | 39 |
| H(44)  | -482  | 17015 | 2541 | 43 |
| H(45)  | 1420  | 16409 | 1646 | 39 |
| H(46)  | 2586  | 15002 | 2840 | 31 |
| H(48B) | 2545  | 11080 | 3219 | 51 |
| H(48C) | 1783  | 11842 | 3945 | 51 |
| H(48A) | 1066  | 10694 | 3883 | 51 |
| H(49A) | 1922  | 7532  | 4041 | 51 |
| H(49C) | 3146  | 8453  | 3745 | 51 |
| H(49B) | 1820  | 9006  | 3484 | 51 |
| H(50B) | 14    | 8657  | 5215 | 47 |
| H(50C) | 181   | 7945  | 6608 | 47 |
| H(50A) | 190   | 7195  | 5759 | 47 |
| H(51B) | 3411  | 7308  | 5688 | 33 |
| H(51A) | 2105  | 6430  | 6240 | 33 |
| H(52A) | 1506  | 7146  | 7821 | 33 |
| H(52B) | 2896  | 6639  | 7856 | 33 |
| H(53B) | 4609  | 7985  | 7655 | 52 |
| H(53C) | 4682  | 9432  | 6762 | 52 |
| H(53A) | 4687  | 8407  | 6207 | 52 |
| H(54A) | 1510  | 8773  | 8424 | 50 |
| H(54C) | 2810  | 9582  | 8156 | 50 |
| H(54B) | 2675  | 8116  | 8997 | 50 |
| H(55A) | 11423 | 11298 | -618 | 54 |
| H(55B) | 10656 | 11110 | 740  | 54 |
| H(56B) | 7276  | 8205  | 4030 | 57 |
| H(56A) | 7618  | 8602  | 2564 | 57 |

---

Table 6. Torsion angles [deg] for **7a**.

|                        |            |
|------------------------|------------|
| C(21)-Pd(1)-O(1)-C(1)  | -56.0(3)   |
| N(2)-Pd(1)-O(1)-C(1)   | -176.2(15) |
| N(1)-Pd(1)-O(1)-C(1)   | 122.9(3)   |
| C(48)-Pd(2)-O(3)-C(28) | -57.6(3)   |
| N(3)-Pd(2)-O(3)-C(28)  | 175.7(15)  |
| N(4)-Pd(2)-O(3)-C(28)  | 120.5(3)   |
| C(21)-Pd(1)-N(1)-C(22) | 77(4)      |
| O(1)-Pd(1)-N(1)-C(22)  | -77.7(3)   |
| N(2)-Pd(1)-N(1)-C(22)  | 106.3(3)   |
| C(21)-Pd(1)-N(1)-C(23) | -160(3)    |
| O(1)-Pd(1)-N(1)-C(23)  | 44.4(3)    |
| N(2)-Pd(1)-N(1)-C(23)  | -131.6(3)  |
| C(21)-Pd(1)-N(1)-C(24) | -42(4)     |
| O(1)-Pd(1)-N(1)-C(24)  | 163.2(3)   |
| N(2)-Pd(1)-N(1)-C(24)  | -12.8(3)   |
| C(21)-Pd(1)-N(2)-C(27) | 42.8(3)    |
| O(1)-Pd(1)-N(2)-C(27)  | 162.8(15)  |
| N(1)-Pd(1)-N(2)-C(27)  | -135.9(3)  |
| C(21)-Pd(1)-N(2)-C(26) | -78.7(3)   |
| O(1)-Pd(1)-N(2)-C(26)  | 41.3(17)   |
| N(1)-Pd(1)-N(2)-C(26)  | 102.6(3)   |
| C(21)-Pd(1)-N(2)-C(25) | 163.0(3)   |
| O(1)-Pd(1)-N(2)-C(25)  | -77.0(16)  |
| N(1)-Pd(1)-N(2)-C(25)  | -15.7(3)   |
| C(48)-Pd(2)-N(3)-C(51) | 161.1(3)   |
| O(3)-Pd(2)-N(3)-C(51)  | -72.4(16)  |
| N(4)-Pd(2)-N(3)-C(51)  | -16.9(2)   |
| C(48)-Pd(2)-N(3)-C(49) | 41.4(3)    |
| O(3)-Pd(2)-N(3)-C(49)  | 167.9(15)  |
| N(4)-Pd(2)-N(3)-C(49)  | -136.6(3)  |
| C(48)-Pd(2)-N(3)-C(50) | -80.8(3)   |
| O(3)-Pd(2)-N(3)-C(50)  | 45.8(17)   |
| N(4)-Pd(2)-N(3)-C(50)  | 101.3(3)   |
| C(48)-Pd(2)-N(4)-C(54) | 180(100)   |
| O(3)-Pd(2)-N(4)-C(54)  | 45.1(3)    |
| N(3)-Pd(2)-N(4)-C(54)  | -131.0(3)  |
| C(48)-Pd(2)-N(4)-C(53) | 58(3)      |
| O(3)-Pd(2)-N(4)-C(53)  | -76.5(3)   |
| N(3)-Pd(2)-N(4)-C(53)  | 107.4(3)   |
| C(48)-Pd(2)-N(4)-C(52) | -61(3)     |
| O(3)-Pd(2)-N(4)-C(52)  | 165.0(2)   |
| N(3)-Pd(2)-N(4)-C(52)  | -11.1(2)   |



|                         |           |
|-------------------------|-----------|
| Pd(1)-O(1)-C(1)-C(10)   | 135.9(3)  |
| Pd(1)-O(1)-C(1)-C(2)    | -44.8(4)  |
| O(1)-C(1)-C(2)-C(3)     | -175.2(3) |
| C(10)-C(1)-C(2)-C(3)    | 4.0(6)    |
| C(1)-C(2)-C(3)-C(4)     | 1.0(6)    |
| C(2)-C(3)-C(4)-C(5)     | 178.8(4)  |
| C(2)-C(3)-C(4)-C(9)     | -3.4(5)   |
| C(3)-C(4)-C(5)-C(6)     | 176.6(4)  |
| C(9)-C(4)-C(5)-C(6)     | -1.2(6)   |
| C(4)-C(5)-C(6)-C(7)     | 3.3(6)    |
| C(5)-C(6)-C(7)-C(8)     | -2.2(6)   |
| C(6)-C(7)-C(8)-C(9)     | -1.1(6)   |
| C(7)-C(8)-C(9)-C(10)    | -177.8(4) |
| C(7)-C(8)-C(9)-C(4)     | 3.1(5)    |
| C(5)-C(4)-C(9)-C(8)     | -2.0(5)   |
| C(3)-C(4)-C(9)-C(8)     | -179.8(3) |
| C(5)-C(4)-C(9)-C(10)    | 178.9(3)  |
| C(3)-C(4)-C(9)-C(10)    | 1.0(5)    |
| O(1)-C(1)-C(10)-C(9)    | 172.9(3)  |
| C(2)-C(1)-C(10)-C(9)    | -6.3(5)   |
| O(1)-C(1)-C(10)-C(11)   | -6.3(5)   |
| C(2)-C(1)-C(10)-C(11)   | 174.4(3)  |
| C(8)-C(9)-C(10)-C(1)    | -175.3(3) |
| C(4)-C(9)-C(10)-C(1)    | 3.8(5)    |
| C(8)-C(9)-C(10)-C(11)   | 4.0(5)    |
| C(4)-C(9)-C(10)-C(11)   | -176.9(3) |
| C(1)-C(10)-C(11)-C(12)  | 56.6(5)   |
| C(9)-C(10)-C(11)-C(12)  | -122.6(4) |
| C(1)-C(10)-C(11)-C(20)  | -123.4(4) |
| C(9)-C(10)-C(11)-C(20)  | 57.3(5)   |
| C(20)-C(11)-C(12)-O(2)  | 169.9(3)  |
| C(10)-C(11)-C(12)-O(2)  | -10.2(6)  |
| C(20)-C(11)-C(12)-C(13) | -10.2(6)  |
| C(10)-C(11)-C(12)-C(13) | 169.7(3)  |
| O(2)-C(12)-C(13)-C(14)  | -174.7(4) |
| C(11)-C(12)-C(13)-C(14) | 5.4(6)    |
| C(12)-C(13)-C(14)-C(15) | 2.7(6)    |
| C(13)-C(14)-C(15)-C(20) | -5.3(6)   |
| C(13)-C(14)-C(15)-C(16) | 174.3(4)  |
| C(14)-C(15)-C(16)-C(17) | -178.8(4) |
| C(20)-C(15)-C(16)-C(17) | 0.8(6)    |
| C(15)-C(16)-C(17)-C(18) | -0.8(7)   |
| C(16)-C(17)-C(18)-C(19) | 1.3(7)    |
| C(17)-C(18)-C(19)-C(20) | -1.7(6)   |

|                         |           |
|-------------------------|-----------|
| C(14)-C(15)-C(20)-C(19) | 178.5(4)  |
| C(16)-C(15)-C(20)-C(19) | -1.1(5)   |
| C(14)-C(15)-C(20)-C(11) | 0.1(5)    |
| C(16)-C(15)-C(20)-C(11) | -179.5(4) |
| C(18)-C(19)-C(20)-C(15) | 1.6(6)    |
| C(18)-C(19)-C(20)-C(11) | 179.9(4)  |
| C(12)-C(11)-C(20)-C(15) | 7.5(5)    |
| C(10)-C(11)-C(20)-C(15) | -172.5(3) |
| C(12)-C(11)-C(20)-C(19) | -170.8(3) |
| C(10)-C(11)-C(20)-C(19) | 9.2(6)    |
| C(22)-N(1)-C(24)-C(25)  | -79.8(4)  |
| C(23)-N(1)-C(24)-C(25)  | 159.5(4)  |
| Pd(1)-N(1)-C(24)-C(25)  | 39.1(4)   |
| C(27)-N(2)-C(25)-C(24)  | 167.9(4)  |
| C(26)-N(2)-C(25)-C(24)  | -74.2(4)  |
| Pd(1)-N(2)-C(25)-C(24)  | 42.9(4)   |
| N(1)-C(24)-C(25)-N(2)   | -57.7(5)  |
| Pd(2)-O(3)-C(28)-C(37)  | 141.1(3)  |
| Pd(2)-O(3)-C(28)-C(29)  | -40.7(5)  |
| O(3)-C(28)-C(29)-C(30)  | -174.7(4) |
| C(37)-C(28)-C(29)-C(30) | 3.5(6)    |
| C(28)-C(29)-C(30)-C(31) | 2.3(6)    |
| C(29)-C(30)-C(31)-C(36) | -4.1(6)   |
| C(29)-C(30)-C(31)-C(32) | 176.9(4)  |
| C(30)-C(31)-C(32)-C(33) | 177.9(4)  |
| C(36)-C(31)-C(32)-C(33) | -1.0(6)   |
| C(31)-C(32)-C(33)-C(34) | 2.7(7)    |
| C(32)-C(33)-C(34)-C(35) | -1.4(7)   |
| C(33)-C(34)-C(35)-C(36) | -1.4(6)   |
| C(30)-C(31)-C(36)-C(35) | 179.3(3)  |
| C(32)-C(31)-C(36)-C(35) | -1.8(5)   |
| C(30)-C(31)-C(36)-C(37) | 0.3(5)    |
| C(32)-C(31)-C(36)-C(37) | 179.2(3)  |
| C(34)-C(35)-C(36)-C(31) | 3.0(5)    |
| C(34)-C(35)-C(36)-C(37) | -178.1(4) |
| O(3)-C(28)-C(37)-C(36)  | 171.0(3)  |
| C(29)-C(28)-C(37)-C(36) | -7.2(5)   |
| O(3)-C(28)-C(37)-C(38)  | -9.0(5)   |
| C(29)-C(28)-C(37)-C(38) | 172.7(3)  |
| C(31)-C(36)-C(37)-C(28) | 5.4(5)    |
| C(35)-C(36)-C(37)-C(28) | -173.6(3) |
| C(31)-C(36)-C(37)-C(38) | -174.6(3) |
| C(35)-C(36)-C(37)-C(38) | 6.5(5)    |
| C(28)-C(37)-C(38)-C(39) | 55.7(5)   |

|                             |            |
|-----------------------------|------------|
| C (36)–C (37)–C (38)–C (39) | –124.3 (4) |
| C (28)–C (37)–C (38)–C (47) | –122.4 (4) |
| C (36)–C (37)–C (38)–C (47) | 57.6 (5)   |
| C (47)–C (38)–C (39)–O (4)  | 171.4 (3)  |
| C (37)–C (38)–C (39)–O (4)  | –6.8 (6)   |
| C (47)–C (38)–C (39)–C (40) | –8.7 (6)   |
| C (37)–C (38)–C (39)–C (40) | 173.1 (3)  |
| O (4)–C (39)–C (40)–C (41)  | –174.8 (3) |
| C (38)–C (39)–C (40)–C (41) | 5.2 (6)    |
| C (39)–C (40)–C (41)–C (42) | 1.3 (6)    |
| C (40)–C (41)–C (42)–C (43) | 176.2 (4)  |
| C (40)–C (41)–C (42)–C (47) | –3.9 (6)   |
| C (41)–C (42)–C (43)–C (44) | 178.6 (4)  |
| C (47)–C (42)–C (43)–C (44) | –1.3 (6)   |
| C (42)–C (43)–C (44)–C (45) | 1.4 (7)    |
| C (43)–C (44)–C (45)–C (46) | –0.2 (7)   |
| C (44)–C (45)–C (46)–C (47) | –1.0 (6)   |
| C (43)–C (42)–C (47)–C (46) | 0.1 (5)    |
| C (41)–C (42)–C (47)–C (46) | –179.8 (4) |
| C (43)–C (42)–C (47)–C (38) | –179.8 (3) |
| C (41)–C (42)–C (47)–C (38) | 0.3 (5)    |
| C (45)–C (46)–C (47)–C (42) | 1.1 (6)    |
| C (45)–C (46)–C (47)–C (38) | –179.0 (4) |
| C (39)–C (38)–C (47)–C (42) | 5.9 (5)    |
| C (37)–C (38)–C (47)–C (42) | –175.9 (3) |
| C (39)–C (38)–C (47)–C (46) | –174.0 (4) |
| C (37)–C (38)–C (47)–C (46) | 4.2 (6)    |
| C (49)–N (3)–C (51)–C (52)  | 167.9 (3)  |
| C (50)–N (3)–C (51)–C (52)  | –74.1 (4)  |
| Pd (2)–N (3)–C (51)–C (52)  | 43.1 (4)   |
| C (54)–N (4)–C (52)–C (51)  | 159.2 (3)  |
| C (53)–N (4)–C (52)–C (51)  | –80.9 (4)  |
| Pd (2)–N (4)–C (52)–C (51)  | 36.8 (4)   |
| N (3)–C (51)–C (52)–N (4)   | –55.9 (5)  |

---

Symmetry transformations used to generate equivalent atoms:

Table 7. Hydrogen bonds for **7a** [Å and deg.].

---

| D-H...A          | d(D-H) | d(H...A) | d(D...A) | <(DHA) |
|------------------|--------|----------|----------|--------|
| O(2)-H(2)...O(1) | 0.84   | 1.81     | 2.591(4) | 153.9  |
| O(4)-H(4)...O(3) | 0.84   | 1.76     | 2.551(4) | 155.8  |

---

Symmetry transformations used to generate equivalent atoms:

### The X-ray structure of compound 7b

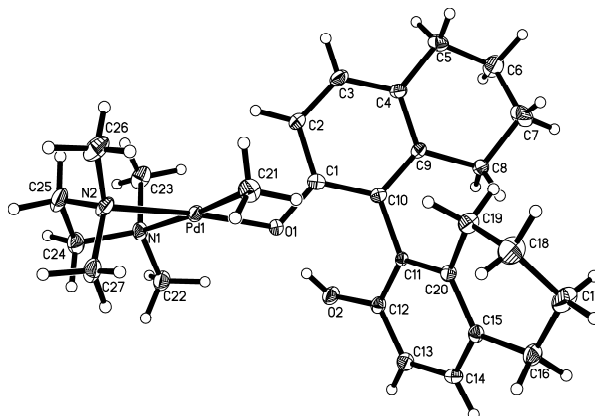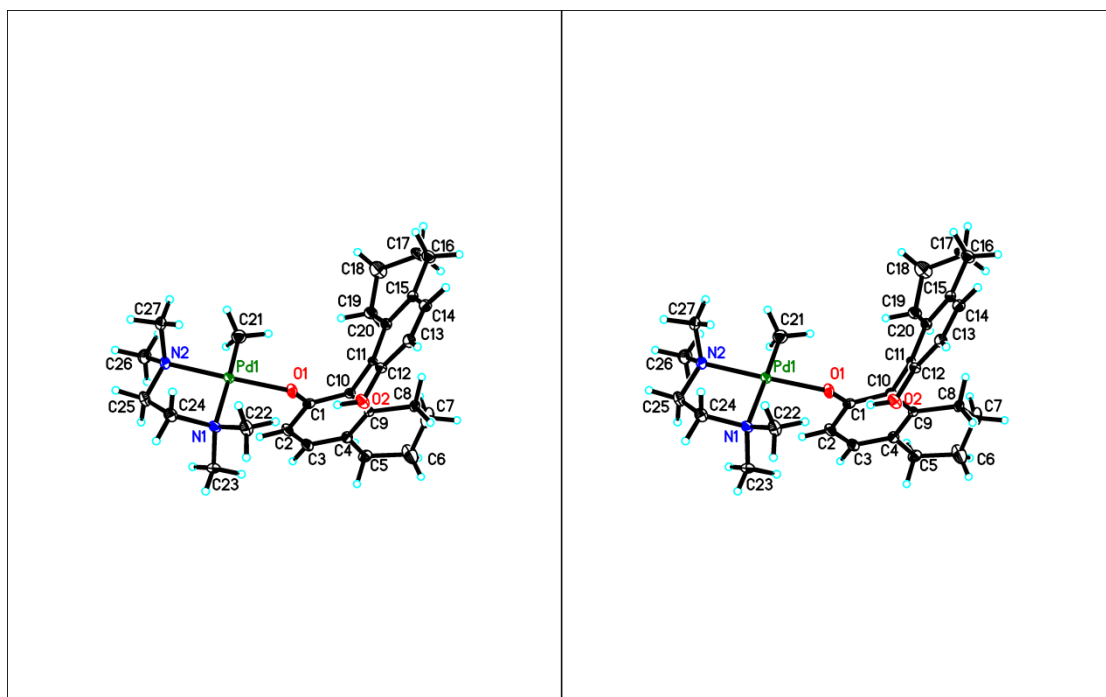

Table 1. Crystal data and structure refinement for **7b**.

|                                   |                                                                                                                                 |
|-----------------------------------|---------------------------------------------------------------------------------------------------------------------------------|
| Identification code               | a                                                                                                                               |
| Empirical formula                 | C <sub>28</sub> H <sub>42</sub> Cl <sub>2</sub> N <sub>2</sub> O <sub>2</sub> Pd                                                |
| Formula weight                    | 615.94                                                                                                                          |
| Temperature                       | 173(2) K                                                                                                                        |
| Wavelength                        | 0.71073 Å                                                                                                                       |
| Crystal system, space group       | Triclinic, P1                                                                                                                   |
| Unit cell dimensions              | a = 10.839(2) Å    alpha = 62.30(3) deg.<br>b = 12.056(2) Å    beta = 78.85(3) deg.<br>c = 12.660(3) Å    gamma = 89.82(3) deg. |
| Volume                            | 1430.1(5) Å <sup>3</sup>                                                                                                        |
| Z, Calculated density             | 2, 1.430 Mg/m <sup>3</sup>                                                                                                      |
| Absorption coefficient            | 0.863 mm <sup>-1</sup>                                                                                                          |
| F(000)                            | 640                                                                                                                             |
| Crystal size                      | 0.28 x 0.13 x 0.05 mm                                                                                                           |
| Theta range for data collection   | 1.92 to 27.45 deg.                                                                                                              |
| Limiting indices                  | -14<=h<=14, -15<=k<=15, -16<=l<=16                                                                                              |
| Reflections collected / unique    | 18592 / 11701 [R(int) = 0.0723]                                                                                                 |
| Completeness to theta = 27.45     | 99.6 %                                                                                                                          |
| Absorption correction             | Semi-empirical from equivalents                                                                                                 |
| Max. and min. transmission        | 1.0000 and 0.5278                                                                                                               |
| Refinement method                 | Full-matrix least-squares on F <sup>2</sup>                                                                                     |
| Data / restraints / parameters    | 11701 / 3 / 643                                                                                                                 |
| Goodness-of-fit on F <sup>2</sup> | 1.435                                                                                                                           |
| Final R indices [I>2sigma(I)]     | R1 = 0.0847, wR2 = 0.2123                                                                                                       |
| R indices (all data)              | R1 = 0.0861, wR2 = 0.2143                                                                                                       |
| Absolute structure parameter      | 0.01(4)                                                                                                                         |
| Largest diff. peak and hole       | 7.143 and -1.254 e.Å <sup>-3</sup>                                                                                              |

Table 2. Atomic coordinates ( $\times 10^4$ ) and equivalent isotropic displacement parameters ( $\text{\AA}^2 \times 10^3$ ) for **7b**.  
U(eq) is defined as one third of the trace of the orthogonalized Uij tensor.

|       | x        | y        | z        | U(eq) |
|-------|----------|----------|----------|-------|
| Pd(1) | 5935(1)  | 7344(1)  | 7024(1)  | 20(1) |
| Pd(2) | 1451(1)  | 7230(1)  | 4760(1)  | 21(1) |
| Cl(1) | 1391(4)  | 7249(3)  | 9921(3)  | 67(1) |
| Cl(2) | -1026(4) | 7292(4)  | 9207(3)  | 69(1) |
| Cl(3) | 5443(4)  | 7273(5)  | 2353(6)  | 93(2) |
| Cl(4) | 8152(3)  | 7248(3)  | 2197(2)  | 49(1) |
| O(1)  | 6387(6)  | 5797(5)  | 6814(5)  | 26(1) |
| O(2)  | 6657(6)  | 4804(6)  | 5344(5)  | 30(1) |
| O(3)  | 1827(6)  | 8765(5)  | 4957(5)  | 28(1) |
| O(4)  | 1410(6)  | 9722(6)  | 6445(5)  | 29(1) |
| N(1)  | 7251(6)  | 8643(6)  | 5324(6)  | 24(1) |
| N(2)  | 5417(6)  | 8986(7)  | 7100(7)  | 27(1) |
| N(3)  | 2032(6)  | 5949(6)  | 6462(6)  | 22(1) |
| N(4)  | 962(6)   | 5591(6)  | 4719(6)  | 26(1) |
| C(1)  | 6875(7)  | 4863(7)  | 7665(6)  | 22(1) |
| C(2)  | 7736(8)  | 5115(8)  | 8250(7)  | 27(2) |
| C(3)  | 8327(8)  | 4139(8)  | 9015(8)  | 29(2) |
| C(4)  | 8148(7)  | 2918(7)  | 9219(7)  | 23(1) |
| C(5)  | 8879(8)  | 1926(8)  | 10026(8) | 30(2) |
| C(6)  | 8859(12) | 735(10)  | 9899(14) | 63(4) |
| C(7)  | 7662(12) | 340(10)  | 9758(11) | 50(3) |
| C(8)  | 7172(7)  | 1341(7)  | 8731(7)  | 23(1) |
| C(9)  | 7292(7)  | 2644(7)  | 8648(7)  | 19(1) |
| C(10) | 6616(7)  | 3614(7)  | 7904(6)  | 19(1) |
| C(11) | 5608(6)  | 3301(6)  | 7399(7)  | 16(1) |
| C(12) | 5733(7)  | 3850(7)  | 6127(7)  | 21(1) |
| C(13) | 4922(8)  | 3424(7)  | 5633(7)  | 26(2) |
| C(14) | 3929(8)  | 2535(8)  | 6398(7)  | 24(2) |
| C(15) | 3680(7)  | 2079(7)  | 7666(7)  | 21(1) |
| C(16) | 2508(8)  | 1167(8)  | 8457(8)  | 30(2) |
| C(17) | 2456(11) | 566(11)  | 9776(9)  | 46(3) |
| C(18) | 2894(11) | 1487(11) | 10166(9) | 49(3) |
| C(19) | 4222(8)  | 2082(8)  | 9522(7)  | 29(2) |
| C(20) | 4523(7)  | 2477(7)  | 8162(7)  | 21(1) |
| C(21) | 4777(9)  | 6189(9)  | 8642(8)  | 36(2) |
| C(22) | 7221(9)  | 8379(8)  | 4311(8)  | 33(2) |
| C(23) | 8536(7)  | 8576(9)  | 5559(9)  | 35(2) |

|        |           |            |           |        |
|--------|-----------|------------|-----------|--------|
| C (24) | 6826 (8)  | 9914 (8)   | 5055 (8)  | 32 (2) |
| C (25) | 6420 (9)  | 9984 (9)   | 6233 (10) | 37 (2) |
| C (26) | 5277 (10) | 8906 (10)  | 8340 (10) | 41 (2) |
| C (27) | 4194 (8)  | 9262 (8)   | 6722 (10) | 36 (2) |
| C (28) | 2700 (7)  | 9700 (7)   | 4108 (6)  | 22 (1) |
| C (29) | 3800 (8)  | 9466 (8)   | 3501 (7)  | 27 (2) |
| C (30) | 4747 (8)  | 10450 (8)  | 2725 (8)  | 29 (2) |
| C (31) | 4630 (7)  | 11659 (8)  | 2579 (7)  | 26 (2) |
| C (32) | 5709 (8)  | 12685 (9)  | 1747 (8)  | 33 (2) |
| C (33) | 5658 (9)  | 13864 (10) | 1873 (10) | 41 (2) |
| C (34) | 4324 (10) | 14209 (10) | 1981 (9)  | 43 (2) |
| C (35) | 3414 (8)  | 13224 (7)  | 3065 (7)  | 26 (2) |
| C (36) | 3519 (7)  | 11916 (7)  | 3151 (6)  | 21 (1) |
| C (37) | 2521 (7)  | 10945 (7)  | 3870 (7)  | 21 (1) |
| C (38) | 1279 (7)  | 11257 (7)  | 4393 (6)  | 17 (1) |
| C (39) | 851 (7)   | 10690 (7)  | 5666 (6)  | 20 (1) |
| C (40) | -215 (8)  | 11079 (8)  | 6178 (7)  | 27 (2) |
| C (41) | -856 (8)  | 12014 (8)  | 5413 (8)  | 26 (2) |
| C (42) | -511 (7)  | 12490 (7)  | 4140 (7)  | 22 (2) |
| C (43) | -1309 (8) | 13449 (8)  | 3374 (8)  | 28 (2) |
| C (44) | -1055 (9) | 13696 (10) | 2056 (8)  | 38 (2) |
| C (45) | 342 (10)  | 13785 (9)  | 1553 (9)  | 41 (2) |
| C (46) | 884 (7)   | 12555 (7)  | 2267 (7)  | 25 (2) |
| C (47) | 544 (7)   | 12110 (7)  | 3641 (6)  | 20 (1) |
| C (48) | 976 (8)   | 8357 (8)   | 3145 (7)  | 32 (2) |
| C (49) | 3423 (9)  | 6037 (10)  | 6221 (11) | 42 (2) |
| C (50) | 1544 (10) | 6208 (8)   | 7473 (8)  | 37 (2) |
| C (51) | 1504 (9)  | 4700 (8)   | 6753 (9)  | 35 (2) |
| C (52) | 1621 (9)  | 4596 (8)   | 5576 (10) | 36 (2) |
| C (53) | 1351 (9)  | 5618 (10)  | 3513 (9)  | 38 (2) |
| C (54) | -427 (7)  | 5291 (8)   | 5129 (9)  | 30 (2) |
| C (55) | 208 (11)  | 8194 (10)  | 9264 (10) | 45 (3) |
| C (56) | 6752 (12) | 6437 (11)  | 2412 (11) | 49 (3) |

---



Table 3. Bond lengths [Å] and angles [deg] for **7b**.

---

|             |           |
|-------------|-----------|
| Pd(1)–C(21) | 2.018(9)  |
| Pd(1)–O(1)  | 2.048(5)  |
| Pd(1)–N(2)  | 2.096(7)  |
| Pd(1)–N(1)  | 2.194(7)  |
| Pd(2)–C(48) | 2.027(8)  |
| Pd(2)–O(3)  | 2.032(6)  |
| Pd(2)–N(4)  | 2.074(7)  |
| Pd(2)–N(3)  | 2.202(6)  |
| Cl(1)–C(55) | 1.776(11) |
| Cl(2)–C(55) | 1.760(13) |
| Cl(3)–C(56) | 1.731(14) |
| Cl(4)–C(56) | 1.714(12) |
| O(1)–C(1)   | 1.341(9)  |
| O(2)–C(12)  | 1.368(9)  |
| O(2)–H(2)   | 0.8400    |
| O(3)–C(28)  | 1.345(9)  |
| O(4)–C(39)  | 1.364(9)  |
| O(4)–H(4)   | 0.8400    |
| N(1)–C(22)  | 1.464(11) |
| N(1)–C(23)  | 1.474(10) |
| N(1)–C(24)  | 1.499(10) |
| N(2)–C(25)  | 1.468(12) |
| N(2)–C(27)  | 1.480(10) |
| N(2)–C(26)  | 1.506(11) |
| N(3)–C(50)  | 1.458(11) |
| N(3)–C(51)  | 1.462(10) |
| N(3)–C(49)  | 1.473(11) |
| N(4)–C(54)  | 1.481(10) |
| N(4)–C(53)  | 1.487(11) |
| N(4)–C(52)  | 1.487(11) |
| C(1)–C(10)  | 1.409(11) |
| C(1)–C(2)   | 1.411(10) |
| C(2)–C(3)   | 1.382(11) |
| C(2)–H(2A)  | 0.9500    |
| C(3)–C(4)   | 1.379(11) |
| C(3)–H(3)   | 0.9500    |
| C(4)–C(9)   | 1.406(9)  |
| C(4)–C(5)   | 1.508(10) |
| C(5)–C(6)   | 1.517(14) |
| C(5)–H(5A)  | 0.9900    |
| C(5)–H(5B)  | 0.9900    |
| C(6)–C(7)   | 1.454(15) |

|                |            |
|----------------|------------|
| C (6)–H (6A)   | 0.9900     |
| C (6)–H (6B)   | 0.9900     |
| C (7)–C (8)    | 1.495 (11) |
| C (7)–H (7B)   | 0.9900     |
| C (7)–H (7A)   | 0.9900     |
| C (8)–C (9)    | 1.529 (10) |
| C (8)–H (8A)   | 0.9900     |
| C (8)–H (8B)   | 0.9900     |
| C (9)–C (10)   | 1.425 (9)  |
| C (10)–C (11)  | 1.496 (9)  |
| C (11)–C (12)  | 1.406 (10) |
| C (11)–C (20)  | 1.407 (10) |
| C (12)–C (13)  | 1.393 (10) |
| C (13)–C (14)  | 1.373 (11) |
| C (13)–H (13)  | 0.9500     |
| C (14)–C (15)  | 1.402 (11) |
| C (14)–H (14)  | 0.9500     |
| C (15)–C (20)  | 1.402 (10) |
| C (15)–C (16)  | 1.523 (11) |
| C (16)–C (17)  | 1.468 (13) |
| C (16)–H (16B) | 0.9900     |
| C (16)–H (16A) | 0.9900     |
| C (17)–C (18)  | 1.519 (15) |
| C (17)–H (17B) | 0.9900     |
| C (17)–H (17A) | 0.9900     |
| C (18)–C (19)  | 1.504 (13) |
| C (18)–H (18A) | 0.9900     |
| C (18)–H (18B) | 0.9900     |
| C (19)–C (20)  | 1.523 (10) |
| C (19)–H (19A) | 0.9900     |
| C (19)–H (19B) | 0.9900     |
| C (21)–H (21A) | 0.9800     |
| C (21)–H (21B) | 0.9800     |
| C (21)–H (21C) | 0.9800     |
| C (22)–H (22A) | 0.9800     |
| C (22)–H (22C) | 0.9800     |
| C (22)–H (22B) | 0.9800     |
| C (23)–H (23A) | 0.9800     |
| C (23)–H (23C) | 0.9800     |
| C (23)–H (23B) | 0.9800     |
| C (24)–C (25)  | 1.512 (13) |
| C (24)–H (24A) | 0.9900     |
| C (24)–H (24B) | 0.9900     |
| C (25)–H (25B) | 0.9900     |

|                |            |
|----------------|------------|
| C (25)–H (25A) | 0.9900     |
| C (26)–H (26A) | 0.9800     |
| C (26)–H (26C) | 0.9800     |
| C (26)–H (26B) | 0.9800     |
| C (27)–H (27A) | 0.9800     |
| C (27)–H (27C) | 0.9800     |
| C (27)–H (27B) | 0.9800     |
| C (28)–C (29)  | 1.391 (11) |
| C (28)–C (37)  | 1.408 (11) |
| C (29)–C (30)  | 1.401 (12) |
| C (29)–H (29)  | 0.9500     |
| C (30)–C (31)  | 1.391 (12) |
| C (30)–H (30)  | 0.9500     |
| C (31)–C (36)  | 1.392 (11) |
| C (31)–C (32)  | 1.526 (11) |
| C (32)–C (33)  | 1.501 (13) |
| C (32)–H (32B) | 0.9900     |
| C (32)–H (32A) | 0.9900     |
| C (33)–C (34)  | 1.502 (15) |
| C (33)–H (33A) | 0.9900     |
| C (33)–H (33B) | 0.9900     |
| C (34)–C (35)  | 1.495 (12) |
| C (34)–H (34B) | 0.9900     |
| C (34)–H (34A) | 0.9900     |
| C (35)–C (36)  | 1.535 (10) |
| C (35)–H (35A) | 0.9900     |
| C (35)–H (35B) | 0.9900     |
| C (36)–C (37)  | 1.416 (10) |
| C (37)–C (38)  | 1.507 (10) |
| C (38)–C (39)  | 1.404 (9)  |
| C (38)–C (47)  | 1.407 (10) |
| C (39)–C (40)  | 1.402 (11) |
| C (40)–C (41)  | 1.389 (12) |
| C (40)–H (40)  | 0.9500     |
| C (41)–C (42)  | 1.406 (12) |
| C (41)–H (41)  | 0.9500     |
| C (42)–C (47)  | 1.379 (11) |
| C (42)–C (43)  | 1.516 (10) |
| C (43)–C (44)  | 1.520 (12) |
| C (43)–H (43B) | 0.9900     |
| C (43)–H (43A) | 0.9900     |
| C (44)–C (45)  | 1.508 (14) |
| C (44)–H (44A) | 0.9900     |
| C (44)–H (44B) | 0.9900     |

|                     |             |
|---------------------|-------------|
| C (45)–C (46)       | 1. 522 (12) |
| C (45)–H (45B)      | 0. 9900     |
| C (45)–H (45A)      | 0. 9900     |
| C (46)–C (47)       | 1. 528 (10) |
| C (46)–H (46B)      | 0. 9900     |
| C (46)–H (46A)      | 0. 9900     |
| C (48)–H (48B)      | 0. 9800     |
| C (48)–H (48C)      | 0. 9800     |
| C (48)–H (48A)      | 0. 9800     |
| C (49)–H (49B)      | 0. 9800     |
| C (49)–H (49C)      | 0. 9800     |
| C (49)–H (49A)      | 0. 9800     |
| C (50)–H (50A)      | 0. 9800     |
| C (50)–H (50C)      | 0. 9800     |
| C (50)–H (50B)      | 0. 9800     |
| C (51)–C (52)       | 1. 534 (13) |
| C (51)–H (51A)      | 0. 9900     |
| C (51)–H (51B)      | 0. 9900     |
| C (52)–H (52B)      | 0. 9900     |
| C (52)–H (52A)      | 0. 9900     |
| C (53)–H (53A)      | 0. 9800     |
| C (53)–H (53C)      | 0. 9800     |
| C (53)–H (53B)      | 0. 9800     |
| C (54)–H (54B)      | 0. 9800     |
| C (54)–H (54C)      | 0. 9800     |
| C (54)–H (54A)      | 0. 9800     |
| C (55)–H (55B)      | 0. 9900     |
| C (55)–H (55A)      | 0. 9900     |
| C (56)–H (56B)      | 0. 9900     |
| C (56)–H (56A)      | 0. 9900     |
|                     |             |
| C (21)–Pd (1)–O (1) | 88. 7 (3)   |
| C (21)–Pd (1)–N (2) | 93. 8 (3)   |
| O (1)–Pd (1)–N (2)  | 175. 1 (2)  |
| C (21)–Pd (1)–N (1) | 176. 5 (3)  |
| O (1)–Pd (1)–N (1)  | 93. 3 (2)   |
| N (2)–Pd (1)–N (1)  | 84. 4 (3)   |
| C (48)–Pd (2)–O (3) | 89. 9 (3)   |
| C (48)–Pd (2)–N (4) | 93. 4 (3)   |
| O (3)–Pd (2)–N (4)  | 174. 7 (3)  |
| C (48)–Pd (2)–N (3) | 176. 7 (3)  |
| O (3)–Pd (2)–N (3)  | 92. 4 (2)   |
| N (4)–Pd (2)–N (3)  | 84. 5 (2)   |
| C (1)–O (1)–Pd (1)  | 119. 4 (5)  |

|                     |           |
|---------------------|-----------|
| C (12)–O (2)–H (2)  | 109.5     |
| C (28)–O (3)–Pd (2) | 120.3 (5) |
| C (39)–O (4)–H (4)  | 109.5     |
| C (22)–N (1)–C (23) | 110.1 (7) |
| C (22)–N (1)–C (24) | 110.9 (6) |
| C (23)–N (1)–C (24) | 110.0 (7) |
| C (22)–N (1)–Pd (1) | 113.1 (5) |
| C (23)–N (1)–Pd (1) | 108.5 (5) |
| C (24)–N (1)–Pd (1) | 104.1 (5) |
| C (25)–N (2)–C (27) | 110.9 (7) |
| C (25)–N (2)–C (26) | 108.9 (7) |
| C (27)–N (2)–C (26) | 108.5 (7) |
| C (25)–N (2)–Pd (1) | 106.1 (5) |
| C (27)–N (2)–Pd (1) | 107.9 (5) |
| C (26)–N (2)–Pd (1) | 114.6 (6) |
| C (50)–N (3)–C (51) | 109.6 (7) |
| C (50)–N (3)–C (49) | 109.9 (7) |
| C (51)–N (3)–C (49) | 110.9 (7) |
| C (50)–N (3)–Pd (2) | 113.5 (5) |
| C (51)–N (3)–Pd (2) | 104.3 (5) |
| C (49)–N (3)–Pd (2) | 108.6 (6) |
| C (54)–N (4)–C (53) | 108.3 (6) |
| C (54)–N (4)–C (52) | 111.0 (7) |
| C (53)–N (4)–C (52) | 107.1 (7) |
| C (54)–N (4)–Pd (2) | 108.7 (5) |
| C (53)–N (4)–Pd (2) | 115.7 (6) |
| C (52)–N (4)–Pd (2) | 105.9 (5) |
| O (1)–C (1)–C (10)  | 119.5 (6) |
| O (1)–C (1)–C (2)   | 121.3 (7) |
| C (10)–C (1)–C (2)  | 119.0 (7) |
| C (3)–C (2)–C (1)   | 119.2 (7) |
| C (3)–C (2)–H (2A)  | 120.4     |
| C (1)–C (2)–H (2A)  | 120.4     |
| C (4)–C (3)–C (2)   | 123.4 (7) |
| C (4)–C (3)–H (3)   | 118.3     |
| C (2)–C (3)–H (3)   | 118.3     |
| C (3)–C (4)–C (9)   | 118.4 (7) |
| C (3)–C (4)–C (5)   | 119.6 (7) |
| C (9)–C (4)–C (5)   | 122.1 (7) |
| C (4)–C (5)–C (6)   | 113.4 (7) |
| C (4)–C (5)–H (5A)  | 108.9     |
| C (6)–C (5)–H (5A)  | 108.9     |
| C (4)–C (5)–H (5B)  | 108.9     |
| C (6)–C (5)–H (5B)  | 108.9     |

|                    |          |
|--------------------|----------|
| H(5A)-C(5)-H(5B)   | 107.7    |
| C(7)-C(6)-C(5)     | 115.3(9) |
| C(7)-C(6)-H(6A)    | 108.5    |
| C(5)-C(6)-H(6A)    | 108.4    |
| C(7)-C(6)-H(6B)    | 108.4    |
| C(5)-C(6)-H(6B)    | 108.4    |
| H(6A)-C(6)-H(6B)   | 107.5    |
| C(6)-C(7)-C(8)     | 113.7(9) |
| C(6)-C(7)-H(7B)    | 108.8    |
| C(8)-C(7)-H(7B)    | 108.8    |
| C(6)-C(7)-H(7A)    | 108.8    |
| C(8)-C(7)-H(7A)    | 108.8    |
| H(7B)-C(7)-H(7A)   | 107.7    |
| C(7)-C(8)-C(9)     | 114.1(7) |
| C(7)-C(8)-H(8A)    | 108.7    |
| C(9)-C(8)-H(8A)    | 108.7    |
| C(7)-C(8)-H(8B)    | 108.7    |
| C(9)-C(8)-H(8B)    | 108.7    |
| H(8A)-C(8)-H(8B)   | 107.6    |
| C(4)-C(9)-C(10)    | 119.8(7) |
| C(4)-C(9)-C(8)     | 120.1(6) |
| C(10)-C(9)-C(8)    | 119.9(6) |
| C(1)-C(10)-C(9)    | 120.0(6) |
| C(1)-C(10)-C(11)   | 120.0(6) |
| C(9)-C(10)-C(11)   | 120.0(6) |
| C(12)-C(11)-C(20)  | 118.5(6) |
| C(12)-C(11)-C(10)  | 119.6(6) |
| C(20)-C(11)-C(10)  | 121.9(6) |
| O(2)-C(12)-C(13)   | 118.4(7) |
| O(2)-C(12)-C(11)   | 121.1(7) |
| C(13)-C(12)-C(11)  | 120.5(7) |
| C(14)-C(13)-C(12)  | 119.5(7) |
| C(14)-C(13)-H(13)  | 120.2    |
| C(12)-C(13)-H(13)  | 120.2    |
| C(13)-C(14)-C(15)  | 121.5(7) |
| C(13)-C(14)-H(14)  | 119.2    |
| C(15)-C(14)-H(14)  | 119.2    |
| C(14)-C(15)-C(20)  | 118.7(7) |
| C(14)-C(15)-C(16)  | 119.0(7) |
| C(20)-C(15)-C(16)  | 122.3(7) |
| C(17)-C(16)-C(15)  | 114.6(7) |
| C(17)-C(16)-H(16B) | 108.6    |
| C(15)-C(16)-H(16B) | 108.6    |
| C(17)-C(16)-H(16A) | 108.6    |

|                      |          |
|----------------------|----------|
| C (15)-C (16)-H(16A) | 108.6    |
| H(16B)-C (16)-H(16A) | 107.6    |
| C (16)-C (17)-C (18) | 112.0(9) |
| C (16)-C (17)-H(17B) | 109.2    |
| C (18)-C (17)-H(17B) | 109.2    |
| C (16)-C (17)-H(17A) | 109.2    |
| C (18)-C (17)-H(17A) | 109.2    |
| H(17B)-C (17)-H(17A) | 107.9    |
| C (19)-C (18)-C (17) | 112.9(9) |
| C (19)-C (18)-H(18A) | 109.0    |
| C (17)-C (18)-H(18A) | 109.0    |
| C (19)-C (18)-H(18B) | 109.0    |
| C (17)-C (18)-H(18B) | 109.0    |
| H(18A)-C (18)-H(18B) | 107.8    |
| C (18)-C (19)-C (20) | 114.0(7) |
| C (18)-C (19)-H(19A) | 108.7    |
| C (20)-C (19)-H(19A) | 108.7    |
| C (18)-C (19)-H(19B) | 108.7    |
| C (20)-C (19)-H(19B) | 108.7    |
| H(19A)-C (19)-H(19B) | 107.6    |
| C (15)-C (20)-C (11) | 120.3(7) |
| C (15)-C (20)-C (19) | 119.8(7) |
| C (11)-C (20)-C (19) | 119.7(6) |
| Pd(1)-C (21)-H(21A)  | 109.5    |
| Pd(1)-C (21)-H(21B)  | 109.5    |
| H(21A)-C (21)-H(21B) | 109.5    |
| Pd(1)-C (21)-H(21C)  | 109.5    |
| H(21A)-C (21)-H(21C) | 109.5    |
| H(21B)-C (21)-H(21C) | 109.5    |
| N(1)-C (22)-H(22A)   | 109.5    |
| N(1)-C (22)-H(22C)   | 109.5    |
| H(22A)-C (22)-H(22C) | 109.5    |
| N(1)-C (22)-H(22B)   | 109.5    |
| H(22A)-C (22)-H(22B) | 109.5    |
| H(22C)-C (22)-H(22B) | 109.5    |
| N(1)-C (23)-H(23A)   | 109.5    |
| N(1)-C (23)-H(23C)   | 109.5    |
| H(23A)-C (23)-H(23C) | 109.5    |
| N(1)-C (23)-H(23B)   | 109.5    |
| H(23A)-C (23)-H(23B) | 109.5    |
| H(23C)-C (23)-H(23B) | 109.5    |
| N(1)-C (24)-C (25)   | 109.7(7) |
| N(1)-C (24)-H(24A)   | 109.7    |
| C (25)-C (24)-H(24A) | 109.7    |

|                     |          |
|---------------------|----------|
| N(1)–C(24)–H(24B)   | 109.7    |
| C(25)–C(24)–H(24B)  | 109.7    |
| H(24A)–C(24)–H(24B) | 108.2    |
| N(2)–C(25)–C(24)    | 111.6(7) |
| N(2)–C(25)–H(25B)   | 109.3    |
| C(24)–C(25)–H(25B)  | 109.3    |
| N(2)–C(25)–H(25A)   | 109.3    |
| C(24)–C(25)–H(25A)  | 109.3    |
| H(25B)–C(25)–H(25A) | 108.0    |
| N(2)–C(26)–H(26A)   | 109.5    |
| N(2)–C(26)–H(26C)   | 109.5    |
| H(26A)–C(26)–H(26C) | 109.5    |
| N(2)–C(26)–H(26B)   | 109.5    |
| H(26A)–C(26)–H(26B) | 109.5    |
| H(26C)–C(26)–H(26B) | 109.5    |
| N(2)–C(27)–H(27A)   | 109.5    |
| N(2)–C(27)–H(27C)   | 109.5    |
| H(27A)–C(27)–H(27C) | 109.5    |
| N(2)–C(27)–H(27B)   | 109.5    |
| H(27A)–C(27)–H(27B) | 109.5    |
| H(27C)–C(27)–H(27B) | 109.5    |
| O(3)–C(28)–C(29)    | 121.9(7) |
| O(3)–C(28)–C(37)    | 118.8(7) |
| C(29)–C(28)–C(37)   | 119.2(7) |
| C(28)–C(29)–C(30)   | 120.0(7) |
| C(28)–C(29)–H(29)   | 120.0    |
| C(30)–C(29)–H(29)   | 120.0    |
| C(31)–C(30)–C(29)   | 121.0(7) |
| C(31)–C(30)–H(30)   | 119.5    |
| C(29)–C(30)–H(30)   | 119.5    |
| C(30)–C(31)–C(36)   | 119.5(7) |
| C(30)–C(31)–C(32)   | 118.7(7) |
| C(36)–C(31)–C(32)   | 121.8(8) |
| C(33)–C(32)–C(31)   | 115.2(7) |
| C(33)–C(32)–H(32B)  | 108.5    |
| C(31)–C(32)–H(32B)  | 108.5    |
| C(33)–C(32)–H(32A)  | 108.5    |
| C(31)–C(32)–H(32A)  | 108.5    |
| H(32B)–C(32)–H(32A) | 107.5    |
| C(32)–C(33)–C(34)   | 109.7(8) |
| C(32)–C(33)–H(33A)  | 109.7    |
| C(34)–C(33)–H(33A)  | 109.7    |
| C(32)–C(33)–H(33B)  | 109.7    |
| C(34)–C(33)–H(33B)  | 109.7    |



|                     |          |
|---------------------|----------|
| H(33A)-C(33)-H(33B) | 108.2    |
| C(35)-C(34)-C(33)   | 113.7(9) |
| C(35)-C(34)-H(34B)  | 108.8    |
| C(33)-C(34)-H(34B)  | 108.8    |
| C(35)-C(34)-H(34A)  | 108.8    |
| C(33)-C(34)-H(34A)  | 108.8    |
| H(34B)-C(34)-H(34A) | 107.7    |
| C(34)-C(35)-C(36)   | 112.0(8) |
| C(34)-C(35)-H(35A)  | 109.2    |
| C(36)-C(35)-H(35A)  | 109.2    |
| C(34)-C(35)-H(35B)  | 109.2    |
| C(36)-C(35)-H(35B)  | 109.2    |
| H(35A)-C(35)-H(35B) | 107.9    |
| C(31)-C(36)-C(37)   | 119.7(7) |
| C(31)-C(36)-C(35)   | 119.9(7) |
| C(37)-C(36)-C(35)   | 120.3(7) |
| C(28)-C(37)-C(36)   | 120.0(7) |
| C(28)-C(37)-C(38)   | 120.6(6) |
| C(36)-C(37)-C(38)   | 119.4(6) |
| C(39)-C(38)-C(47)   | 119.0(7) |
| C(39)-C(38)-C(37)   | 119.1(6) |
| C(47)-C(38)-C(37)   | 121.9(6) |
| O(4)-C(39)-C(40)    | 117.6(6) |
| O(4)-C(39)-C(38)    | 122.1(7) |
| C(40)-C(39)-C(38)   | 120.2(7) |
| C(41)-C(40)-C(39)   | 119.4(7) |
| C(41)-C(40)-H(40)   | 120.3    |
| C(39)-C(40)-H(40)   | 120.3    |
| C(40)-C(41)-C(42)   | 120.6(8) |
| C(40)-C(41)-H(41)   | 119.7    |
| C(42)-C(41)-H(41)   | 119.7    |
| C(47)-C(42)-C(41)   | 119.5(7) |
| C(47)-C(42)-C(43)   | 123.1(7) |
| C(41)-C(42)-C(43)   | 117.3(7) |
| C(42)-C(43)-C(44)   | 113.5(7) |
| C(42)-C(43)-H(43B)  | 108.9    |
| C(44)-C(43)-H(43B)  | 108.9    |
| C(42)-C(43)-H(43A)  | 108.9    |
| C(44)-C(43)-H(43A)  | 108.9    |
| H(43B)-C(43)-H(43A) | 107.7    |
| C(45)-C(44)-C(43)   | 111.0(7) |
| C(45)-C(44)-H(44A)  | 109.4    |
| C(43)-C(44)-H(44A)  | 109.4    |
| C(45)-C(44)-H(44B)  | 109.4    |

|                        |            |
|------------------------|------------|
| C (43)–C (44)–H (44B)  | 109. 4     |
| H (44A)–C (44)–H (44B) | 108. 0     |
| C (44)–C (45)–C (46)   | 111. 1 (8) |
| C (44)–C (45)–H (45B)  | 109. 4     |
| C (46)–C (45)–H (45B)  | 109. 4     |
| C (44)–C (45)–H (45A)  | 109. 4     |
| C (46)–C (45)–H (45A)  | 109. 4     |
| H (45B)–C (45)–H (45A) | 108. 0     |
| C (45)–C (46)–C (47)   | 111. 7 (7) |
| C (45)–C (46)–H (46B)  | 109. 3     |
| C (47)–C (46)–H (46B)  | 109. 3     |
| C (45)–C (46)–H (46A)  | 109. 3     |
| C (47)–C (46)–H (46A)  | 109. 3     |
| H (46B)–C (46)–H (46A) | 107. 9     |
| C (42)–C (47)–C (38)   | 120. 7 (7) |
| C (42)–C (47)–C (46)   | 120. 2 (7) |
| C (38)–C (47)–C (46)   | 119. 0 (7) |
| Pd (2)–C (48)–H (48B)  | 109. 5     |
| Pd (2)–C (48)–H (48C)  | 109. 5     |
| H (48B)–C (48)–H (48C) | 109. 5     |
| Pd (2)–C (48)–H (48A)  | 109. 5     |
| H (48B)–C (48)–H (48A) | 109. 5     |
| H (48C)–C (48)–H (48A) | 109. 5     |
| N (3)–C (49)–H (49B)   | 109. 5     |
| N (3)–C (49)–H (49C)   | 109. 5     |
| H (49B)–C (49)–H (49C) | 109. 5     |
| N (3)–C (49)–H (49A)   | 109. 5     |
| H (49B)–C (49)–H (49A) | 109. 5     |
| H (49C)–C (49)–H (49A) | 109. 5     |
| N (3)–C (50)–H (50A)   | 109. 5     |
| N (3)–C (50)–H (50C)   | 109. 5     |
| H (50A)–C (50)–H (50C) | 109. 5     |
| N (3)–C (50)–H (50B)   | 109. 5     |
| H (50A)–C (50)–H (50B) | 109. 5     |
| H (50C)–C (50)–H (50B) | 109. 5     |
| N (3)–C (51)–C (52)    | 109. 8 (7) |
| N (3)–C (51)–H (51A)   | 109. 7     |
| C (52)–C (51)–H (51A)  | 109. 7     |
| N (3)–C (51)–H (51B)   | 109. 7     |
| C (52)–C (51)–H (51B)  | 109. 7     |
| H (51A)–C (51)–H (51B) | 108. 2     |
| N (4)–C (52)–C (51)    | 110. 2 (7) |
| N (4)–C (52)–H (52B)   | 109. 6     |
| C (51)–C (52)–H (52B)  | 109. 6     |

|                     |          |
|---------------------|----------|
| N(4)–C(52)–H(52A)   | 109.6    |
| C(51)–C(52)–H(52A)  | 109.6    |
| H(52B)–C(52)–H(52A) | 108.1    |
| N(4)–C(53)–H(53A)   | 109.5    |
| N(4)–C(53)–H(53C)   | 109.5    |
| H(53A)–C(53)–H(53C) | 109.5    |
| N(4)–C(53)–H(53B)   | 109.5    |
| H(53A)–C(53)–H(53B) | 109.5    |
| H(53C)–C(53)–H(53B) | 109.5    |
| N(4)–C(54)–H(54B)   | 109.5    |
| N(4)–C(54)–H(54C)   | 109.5    |
| H(54B)–C(54)–H(54C) | 109.5    |
| N(4)–C(54)–H(54A)   | 109.5    |
| H(54B)–C(54)–H(54A) | 109.5    |
| H(54C)–C(54)–H(54A) | 109.5    |
| C1(2)–C(55)–C1(1)   | 111.6(6) |
| C1(2)–C(55)–H(55B)  | 109.3    |
| C1(1)–C(55)–H(55B)  | 109.3    |
| C1(2)–C(55)–H(55A)  | 109.3    |
| C1(1)–C(55)–H(55A)  | 109.3    |
| H(55B)–C(55)–H(55A) | 108.0    |
| C1(4)–C(56)–C1(3)   | 115.0(7) |
| C1(4)–C(56)–H(56B)  | 108.5    |
| C1(3)–C(56)–H(56B)  | 108.5    |
| C1(4)–C(56)–H(56A)  | 108.5    |
| C1(3)–C(56)–H(56A)  | 108.5    |
| H(56B)–C(56)–H(56A) | 107.5    |

---

Symmetry transformations used to generate equivalent atoms:

Table 4. Anisotropic displacement parameters ( $\text{Å}^2 \times 10^3$ ) for **7b**.

The anisotropic displacement factor exponent takes the form:

$$-2 \pi^2 [ h^2 a^{*2} U_{11} + \dots + 2 h k a^* b^* U_{12} ]$$

|       | U11   | U22    | U33     | U23    | U13    | U12    |
|-------|-------|--------|---------|--------|--------|--------|
| Pd(1) | 20(1) | 19(1)  | 24(1)   | -11(1) | -5(1)  | 0(1)   |
| Pd(2) | 18(1) | 20(1)  | 24(1)   | -11(1) | -3(1)  | 2(1)   |
| Cl(1) | 77(2) | 47(2)  | 62(2)   | -15(1) | -13(2) | 14(2)  |
| Cl(2) | 74(2) | 82(2)  | 61(2)   | -48(2) | -1(2)  | -12(2) |
| Cl(3) | 58(2) | 102(3) | 152(5)  | -83(3) | -36(3) | 22(2)  |
| Cl(4) | 56(2) | 50(2)  | 34(1)   | -17(1) | -5(1)  | -7(1)  |
| O(1)  | 33(3) | 17(3)  | 30(3)   | -11(2) | -17(2) | 5(2)   |
| O(2)  | 34(3) | 28(3)  | 24(3)   | -11(2) | -2(2)  | -7(2)  |
| O(3)  | 31(3) | 20(3)  | 33(3)   | -15(2) | 0(2)   | 0(2)   |
| O(4)  | 35(3) | 29(3)  | 20(3)   | -10(2) | -6(2)  | 12(3)  |
| N(1)  | 20(3) | 18(3)  | 28(3)   | -7(2)  | -4(3)  | -2(2)  |
| N(2)  | 25(3) | 28(4)  | 39(4)   | -25(3) | -9(3)  | 2(3)   |
| N(3)  | 21(3) | 21(3)  | 25(3)   | -11(2) | -3(2)  | 1(2)   |
| N(4)  | 22(3) | 29(3)  | 33(3)   | -19(3) | -8(3)  | 5(3)   |
| C(1)  | 17(3) | 27(4)  | 19(3)   | -11(3) | -1(3)  | 2(3)   |
| C(2)  | 28(4) | 24(4)  | 31(4)   | -14(3) | -11(3) | -1(3)  |
| C(3)  | 25(4) | 31(4)  | 36(4)   | -19(3) | -12(3) | -1(3)  |
| C(4)  | 24(3) | 26(4)  | 23(3)   | -14(3) | -9(3)  | 4(3)   |
| C(5)  | 25(4) | 36(4)  | 34(4)   | -17(4) | -14(3) | 12(3)  |
| C(6)  | 62(8) | 34(6)  | 106(11) | -28(6) | -63(8) | 19(5)  |
| C(7)  | 74(8) | 34(5)  | 56(6)   | -23(5) | -37(6) | 33(5)  |
| C(8)  | 23(3) | 22(4)  | 28(4)   | -14(3) | -9(3)  | 7(3)   |
| C(9)  | 17(3) | 21(3)  | 24(3)   | -14(3) | -5(3)  | 2(3)   |
| C(10) | 17(3) | 23(3)  | 19(3)   | -11(3) | -3(3)  | 2(3)   |
| C(11) | 11(3) | 14(3)  | 22(3)   | -8(3)  | -5(3)  | 2(2)   |
| C(12) | 17(3) | 20(3)  | 24(3)   | -10(3) | -2(3)  | -1(3)  |
| C(13) | 29(4) | 25(4)  | 22(3)   | -11(3) | -3(3)  | 0(3)   |
| C(14) | 23(4) | 28(4)  | 23(4)   | -13(3) | -9(3)  | 5(3)   |
| C(15) | 20(3) | 19(4)  | 24(4)   | -10(3) | -4(3)  | 2(3)   |
| C(16) | 27(4) | 29(4)  | 31(4)   | -12(3) | -2(3)  | -5(3)  |
| C(17) | 35(5) | 59(7)  | 31(5)   | -15(5) | 8(4)   | -27(5) |
| C(18) | 55(6) | 57(7)  | 31(5)   | -21(5) | 3(4)   | -13(5) |
| C(19) | 26(4) | 34(4)  | 24(4)   | -14(3) | 1(3)   | -4(3)  |
| C(20) | 22(3) | 20(3)  | 21(3)   | -10(3) | -4(3)  | 1(3)   |
| C(21) | 32(4) | 35(5)  | 36(4)   | -14(4) | -4(4)  | 2(4)   |
| C(22) | 43(5) | 25(4)  | 31(4)   | -12(3) | -6(4)  | -3(3)  |
| C(23) | 16(4) | 39(5)  | 55(5)   | -29(4) | 1(4)   | -2(3)  |
| C(24) | 31(4) | 23(4)  | 35(4)   | -9(3)  | -3(3)  | -2(3)  |

|        |        |        |        |         |         |         |
|--------|--------|--------|--------|---------|---------|---------|
| C (25) | 36 (5) | 27 (4) | 54 (6) | -24 (4) | -9 (4)  | -3 (4)  |
| C (26) | 37 (5) | 52 (6) | 51 (6) | -41 (5) | -6 (4)  | 2 (4)   |
| C (27) | 28 (4) | 27 (4) | 60 (6) | -26 (4) | -12 (4) | 7 (3)   |
| C (28) | 19 (3) | 27 (4) | 18 (3) | -11 (3) | -2 (3)  | -1 (3)  |
| C (29) | 27 (4) | 25 (4) | 31 (4) | -13 (3) | -7 (3)  | 5 (3)   |
| C (30) | 23 (4) | 43 (5) | 31 (4) | -27 (4) | 0 (3)   | 8 (3)   |
| C (31) | 17 (3) | 36 (4) | 27 (4) | -18 (3) | -1 (3)  | -3 (3)  |
| C (32) | 17 (3) | 45 (5) | 41 (5) | -28 (4) | 5 (3)   | -10 (3) |
| C (33) | 24 (4) | 44 (6) | 47 (5) | -21 (4) | 7 (4)   | -12 (4) |
| C (34) | 42 (6) | 36 (5) | 37 (5) | -8 (4)  | 3 (4)   | -12 (4) |
| C (35) | 26 (4) | 17 (3) | 33 (4) | -11 (3) | -3 (3)  | -8 (3)  |
| C (36) | 25 (4) | 20 (3) | 18 (3) | -11 (3) | -4 (3)  | -1 (3)  |
| C (37) | 16 (3) | 20 (3) | 22 (3) | -7 (3)  | -4 (3)  | 0 (3)   |
| C (38) | 14 (3) | 15 (3) | 18 (3) | -6 (3)  | 0 (3)   | 0 (3)   |
| C (39) | 21 (3) | 18 (3) | 16 (3) | -5 (3)  | -1 (3)  | -2 (3)  |
| C (40) | 25 (4) | 27 (4) | 28 (4) | -14 (3) | -2 (3)  | 1 (3)   |
| C (41) | 24 (4) | 29 (4) | 30 (4) | -19 (3) | -2 (3)  | 3 (3)   |
| C (42) | 20 (4) | 20 (4) | 29 (4) | -13 (3) | -8 (3)  | 4 (3)   |
| C (43) | 21 (3) | 29 (4) | 37 (4) | -15 (3) | -14 (3) | 9 (3)   |
| C (44) | 30 (4) | 46 (5) | 25 (4) | -7 (4)  | -7 (4)  | 8 (4)   |
| C (45) | 45 (5) | 39 (5) | 32 (4) | -11 (4) | -9 (4)  | 7 (4)   |
| C (46) | 21 (3) | 30 (4) | 20 (3) | -9 (3)  | -5 (3)  | -3 (3)  |
| C (47) | 22 (3) | 18 (3) | 20 (3) | -9 (3)  | -3 (3)  | -5 (3)  |
| C (48) | 25 (4) | 32 (4) | 26 (4) | -3 (3)  | -5 (3)  | 0 (3)   |
| C (49) | 29 (4) | 43 (5) | 69 (7) | -32 (5) | -27 (5) | 8 (4)   |
| C (50) | 53 (6) | 27 (4) | 29 (4) | -12 (3) | -8 (4)  | -2 (4)  |
| C (51) | 41 (5) | 22 (4) | 44 (5) | -14 (4) | -19 (4) | 5 (3)   |
| C (52) | 38 (5) | 23 (4) | 55 (6) | -23 (4) | -19 (5) | 10 (4)  |
| C (53) | 32 (5) | 53 (6) | 49 (5) | -41 (5) | -7 (4)  | 11 (4)  |
| C (54) | 19 (4) | 31 (4) | 45 (5) | -22 (4) | -5 (3)  | -1 (3)  |
| C (55) | 66 (7) | 27 (5) | 40 (5) | -17 (4) | -5 (5)  | 16 (5)  |
| C (56) | 59 (7) | 42 (6) | 44 (6) | -18 (5) | -11 (5) | -10 (5) |

---

Table 5. Hydrogen coordinates ( $\times 10^4$ ) and isotropic displacement parameters ( $\text{Å}^2 \times 10^3$ ) for **7b**.

|        | x    | y     | z     | U(eq) |
|--------|------|-------|-------|-------|
| H(2)   | 6761 | 5275  | 5649  | 44    |
| H(4)   | 1728 | 9306  | 6099  | 43    |
| H(2A)  | 7907 | 5947  | 8120  | 32    |
| H(3)   | 8885 | 4318  | 9422  | 34    |
| H(5A)  | 8520 | 1706  | 10888 | 37    |
| H(5B)  | 9767 | 2280  | 9823  | 37    |
| H(6A)  | 9522 | 866   | 9182  | 75    |
| H(6B)  | 9082 | 43    | 10631 | 75    |
| H(7B)  | 7027 | 74    | 10528 | 60    |
| H(7A)  | 7770 | -400  | 9617  | 60    |
| H(8A)  | 6270 | 1093  | 8831  | 27    |
| H(8B)  | 7637 | 1394  | 7952  | 27    |
| H(13)  | 5056 | 3746  | 4773  | 31    |
| H(14)  | 3399 | 2221  | 6060  | 28    |
| H(16B) | 1751 | 1627  | 8292  | 37    |
| H(16A) | 2469 | 502   | 8211  | 37    |
| H(17B) | 2998 | -137  | 9995  | 55    |
| H(17A) | 1578 | 210   | 10225 | 55    |
| H(18A) | 2315 | 2158  | 9996  | 59    |
| H(18B) | 2843 | 1040  | 11058 | 59    |
| H(19A) | 4818 | 1478  | 9916  | 34    |
| H(19B) | 4363 | 2832  | 9628  | 34    |
| H(21A) | 4719 | 5333  | 8742  | 54    |
| H(21B) | 3934 | 6486  | 8662  | 54    |
| H(21C) | 5115 | 6187  | 9307  | 54    |
| H(22A) | 7098 | 7466  | 4622  | 50    |
| H(22C) | 8022 | 8719  | 3708  | 50    |
| H(22B) | 6524 | 8773  | 3926  | 50    |
| H(23A) | 8783 | 7724  | 5792  | 53    |
| H(23C) | 8550 | 8777  | 6222  | 53    |
| H(23B) | 9129 | 9181  | 4817  | 53    |
| H(24A) | 6111 | 10062 | 4639  | 39    |
| H(24B) | 7527 | 10574 | 4504  | 39    |
| H(25B) | 7157 | 9905  | 6610  | 44    |
| H(25A) | 6113 | 10814 | 6051  | 44    |
| H(26A) | 4619 | 8232  | 8929  | 61    |
| H(26C) | 5041 | 9709  | 8297  | 61    |
| H(26B) | 6081 | 8726  | 8602  | 61    |
| H(27A) | 4221 | 9169  | 5990  | 53    |

|        |       |       |      |    |
|--------|-------|-------|------|----|
| H(27C) | 4037  | 10127 | 6543 | 53 |
| H(27B) | 3513  | 8675  | 7384 | 53 |
| H(29)  | 3908  | 8639  | 3613 | 33 |
| H(30)  | 5482  | 10289 | 2291 | 35 |
| H(32B) | 6518  | 12336 | 1919 | 39 |
| H(32A) | 5708  | 12912 | 889  | 39 |
| H(33A) | 6213  | 14559 | 1149 | 49 |
| H(33B) | 5965  | 13728 | 2607 | 49 |
| H(34B) | 4310  | 15003 | 2033 | 52 |
| H(34A) | 4038  | 14365 | 1231 | 52 |
| H(35A) | 2543  | 13453 | 3009 | 32 |
| H(35B) | 3582  | 13197 | 3818 | 32 |
| H(40)  | -497  | 10707 | 7040 | 32 |
| H(41)  | -1532 | 12334 | 5753 | 32 |
| H(43B) | -1144 | 14251 | 3384 | 34 |
| H(43A) | -2213 | 13147 | 3752 | 34 |
| H(44A) | -1497 | 13007 | 2012 | 45 |
| H(44B) | -1392 | 14492 | 1552 | 45 |
| H(45B) | 784   | 14475 | 1598 | 49 |
| H(45A) | 486   | 13987 | 683  | 49 |
| H(46B) | 1815  | 12673 | 1987 | 30 |
| H(46A) | 554   | 11900 | 2101 | 30 |
| H(48B) | 1607  | 8357  | 2476 | 48 |
| H(48C) | 949   | 9216  | 3034 | 48 |
| H(48A) | 144   | 8042  | 3145 | 48 |
| H(49B) | 3694  | 5484  | 6976 | 64 |
| H(49C) | 3758  | 6908  | 5928 | 64 |
| H(49A) | 3741  | 5778  | 5599 | 64 |
| H(50A) | 680   | 5803  | 7865 | 55 |
| H(50C) | 1544  | 7119  | 7164 | 55 |
| H(50B) | 2082  | 5875  | 8072 | 55 |
| H(51A) | 604   | 4558  | 7173 | 42 |
| H(51B) | 1963  | 4048  | 7310 | 42 |
| H(52B) | 2525  | 4687  | 5183 | 43 |
| H(52A) | 1245  | 3756  | 5775 | 43 |
| H(53A) | 1176  | 4775  | 3610 | 57 |
| H(53C) | 2258  | 5887  | 3193 | 57 |
| H(53B) | 876   | 6211  | 2942 | 57 |
| H(54B) | -840  | 5981  | 4575 | 45 |
| H(54C) | -691  | 5185  | 5959 | 45 |
| H(54A) | -668  | 4511  | 5125 | 45 |
| H(55B) | -139  | 8614  | 9753 | 54 |
| H(55A) | 592   | 8856  | 8426 | 54 |
| H(56B) | 6605  | 5671  | 3217 | 59 |

|        |      |      |      |    |
|--------|------|------|------|----|
| H(56A) | 6832 | 6160 | 1780 | 59 |
|--------|------|------|------|----|

---



Table 6. Torsion angles [deg] for **7b**.

---

|                        |           |
|------------------------|-----------|
| C(21)-Pd(1)-O(1)-C(1)  | -57.7(6)  |
| N(2)-Pd(1)-O(1)-C(1)   | -179(3)   |
| N(1)-Pd(1)-O(1)-C(1)   | 119.5(6)  |
| C(48)-Pd(2)-O(3)-C(28) | -58.6(6)  |
| N(4)-Pd(2)-O(3)-C(28)  | 173(3)    |
| N(3)-Pd(2)-O(3)-C(28)  | 119.0(6)  |
| C(21)-Pd(1)-N(1)-C(22) | 168(5)    |
| O(1)-Pd(1)-N(1)-C(22)  | 42.9(6)   |
| N(2)-Pd(1)-N(1)-C(22)  | -132.8(6) |
| C(21)-Pd(1)-N(1)-C(23) | 45(6)     |
| O(1)-Pd(1)-N(1)-C(23)  | -79.7(5)  |
| N(2)-Pd(1)-N(1)-C(23)  | 104.7(6)  |
| C(21)-Pd(1)-N(1)-C(24) | -72(5)    |
| O(1)-Pd(1)-N(1)-C(24)  | 163.3(5)  |
| N(2)-Pd(1)-N(1)-C(24)  | -12.4(5)  |
| C(21)-Pd(1)-N(2)-C(25) | 161.3(6)  |
| O(1)-Pd(1)-N(2)-C(25)  | -78(3)    |
| N(1)-Pd(1)-N(2)-C(25)  | -15.7(5)  |
| C(21)-Pd(1)-N(2)-C(27) | -79.8(6)  |
| O(1)-Pd(1)-N(2)-C(27)  | 41(3)     |
| N(1)-Pd(1)-N(2)-C(27)  | 103.2(6)  |
| C(21)-Pd(1)-N(2)-C(26) | 41.1(6)   |
| O(1)-Pd(1)-N(2)-C(26)  | 162(3)    |
| N(1)-Pd(1)-N(2)-C(26)  | -135.9(6) |
| C(48)-Pd(2)-N(3)-C(50) | 178(5)    |
| O(3)-Pd(2)-N(3)-C(50)  | 44.4(6)   |
| N(4)-Pd(2)-N(3)-C(50)  | -131.4(6) |
| C(48)-Pd(2)-N(3)-C(51) | -63(5)    |
| O(3)-Pd(2)-N(3)-C(51)  | 163.5(5)  |
| N(4)-Pd(2)-N(3)-C(51)  | -12.2(5)  |
| C(48)-Pd(2)-N(3)-C(49) | 55(5)     |
| O(3)-Pd(2)-N(3)-C(49)  | -78.1(6)  |
| N(4)-Pd(2)-N(3)-C(49)  | 106.2(6)  |
| C(48)-Pd(2)-N(4)-C(54) | -80.1(6)  |
| O(3)-Pd(2)-N(4)-C(54)  | 48(3)     |
| N(3)-Pd(2)-N(4)-C(54)  | 102.4(5)  |
| C(48)-Pd(2)-N(4)-C(53) | 42.0(6)   |
| O(3)-Pd(2)-N(4)-C(53)  | 170(3)    |
| N(3)-Pd(2)-N(4)-C(53)  | -135.5(6) |
| C(48)-Pd(2)-N(4)-C(52) | 160.5(6)  |
| O(3)-Pd(2)-N(4)-C(52)  | -71(3)    |
| N(3)-Pd(2)-N(4)-C(52)  | -17.0(6)  |

|                         |            |
|-------------------------|------------|
| Pd(1)-O(1)-C(1)-C(10)   | 148.2(6)   |
| Pd(1)-O(1)-C(1)-C(2)    | -37.6(9)   |
| O(1)-C(1)-C(2)-C(3)     | -172.5(8)  |
| C(10)-C(1)-C(2)-C(3)    | 1.7(12)    |
| C(1)-C(2)-C(3)-C(4)     | 1.8(13)    |
| C(2)-C(3)-C(4)-C(9)     | -2.0(13)   |
| C(2)-C(3)-C(4)-C(5)     | 177.3(8)   |
| C(3)-C(4)-C(5)-C(6)     | -164.5(10) |
| C(9)-C(4)-C(5)-C(6)     | 14.7(13)   |
| C(4)-C(5)-C(6)-C(7)     | -38.7(15)  |
| C(5)-C(6)-C(7)-C(8)     | 54.1(16)   |
| C(6)-C(7)-C(8)-C(9)     | -43.2(13)  |
| C(3)-C(4)-C(9)-C(10)    | -1.4(11)   |
| C(5)-C(4)-C(9)-C(10)    | 179.4(7)   |
| C(3)-C(4)-C(9)-C(8)     | 173.2(7)   |
| C(5)-C(4)-C(9)-C(8)     | -6.0(11)   |
| C(7)-C(8)-C(9)-C(4)     | 19.6(11)   |
| C(7)-C(8)-C(9)-C(10)    | -165.8(8)  |
| O(1)-C(1)-C(10)-C(9)    | 169.4(7)   |
| C(2)-C(1)-C(10)-C(9)    | -5.0(11)   |
| O(1)-C(1)-C(10)-C(11)   | -12.0(10)  |
| C(2)-C(1)-C(10)-C(11)   | 173.6(7)   |
| C(4)-C(9)-C(10)-C(1)    | 4.9(11)    |
| C(8)-C(9)-C(10)-C(1)    | -169.7(7)  |
| C(4)-C(9)-C(10)-C(11)   | -173.7(7)  |
| C(8)-C(9)-C(10)-C(11)   | 11.7(10)   |
| C(1)-C(10)-C(11)-C(12)  | 62.3(10)   |
| C(9)-C(10)-C(11)-C(12)  | -119.2(8)  |
| C(1)-C(10)-C(11)-C(20)  | -117.1(8)  |
| C(9)-C(10)-C(11)-C(20)  | 61.4(10)   |
| C(20)-C(11)-C(12)-O(2)  | 169.6(7)   |
| C(10)-C(11)-C(12)-O(2)  | -9.8(11)   |
| C(20)-C(11)-C(12)-C(13) | -11.1(11)  |
| C(10)-C(11)-C(12)-C(13) | 169.5(7)   |
| O(2)-C(12)-C(13)-C(14)  | -175.1(7)  |
| C(11)-C(12)-C(13)-C(14) | 5.5(12)    |
| C(12)-C(13)-C(14)-C(15) | 2.6(12)    |
| C(13)-C(14)-C(15)-C(20) | -4.8(12)   |
| C(13)-C(14)-C(15)-C(16) | 175.5(7)   |
| C(14)-C(15)-C(16)-C(17) | 169.1(9)   |
| C(20)-C(15)-C(16)-C(17) | -10.6(13)  |
| C(15)-C(16)-C(17)-C(18) | 41.4(13)   |
| C(16)-C(17)-C(18)-C(19) | -58.6(14)  |
| C(17)-C(18)-C(19)-C(20) | 42.4(12)   |

|                         |           |
|-------------------------|-----------|
| C(14)-C(15)-C(20)-C(11) | -1.1(11)  |
| C(16)-C(15)-C(20)-C(11) | 178.7(7)  |
| C(14)-C(15)-C(20)-C(19) | 175.1(7)  |
| C(16)-C(15)-C(20)-C(19) | -5.1(11)  |
| C(12)-C(11)-C(20)-C(15) | 8.8(11)   |
| C(10)-C(11)-C(20)-C(15) | -171.8(7) |
| C(12)-C(11)-C(20)-C(19) | -167.4(7) |
| C(10)-C(11)-C(20)-C(19) | 12.0(11)  |
| C(18)-C(19)-C(20)-C(15) | -11.2(11) |
| C(18)-C(19)-C(20)-C(11) | 165.0(8)  |
| C(22)-N(1)-C(24)-C(25)  | 160.0(7)  |
| C(23)-N(1)-C(24)-C(25)  | -78.0(9)  |
| Pd(1)-N(1)-C(24)-C(25)  | 38.1(7)   |
| C(27)-N(2)-C(25)-C(24)  | -74.3(9)  |
| C(26)-N(2)-C(25)-C(24)  | 166.4(8)  |
| Pd(1)-N(2)-C(25)-C(24)  | 42.6(8)   |
| N(1)-C(24)-C(25)-N(2)   | -57.0(10) |
| Pd(2)-O(3)-C(28)-C(29)  | -36.2(9)  |
| Pd(2)-O(3)-C(28)-C(37)  | 146.8(5)  |
| O(3)-C(28)-C(29)-C(30)  | -172.9(7) |
| C(37)-C(28)-C(29)-C(30) | 4.0(11)   |
| C(28)-C(29)-C(30)-C(31) | 2.3(12)   |
| C(29)-C(30)-C(31)-C(36) | -4.2(12)  |
| C(29)-C(30)-C(31)-C(32) | 178.4(7)  |
| C(30)-C(31)-C(32)-C(33) | -165.7(8) |
| C(36)-C(31)-C(32)-C(33) | 16.9(11)  |
| C(31)-C(32)-C(33)-C(34) | -41.9(11) |
| C(32)-C(33)-C(34)-C(35) | 60.5(12)  |
| C(33)-C(34)-C(35)-C(36) | -50.2(11) |
| C(30)-C(31)-C(36)-C(37) | -0.2(11)  |
| C(32)-C(31)-C(36)-C(37) | 177.1(7)  |
| C(30)-C(31)-C(36)-C(35) | 176.0(7)  |
| C(32)-C(31)-C(36)-C(35) | -6.7(11)  |
| C(34)-C(35)-C(36)-C(31) | 22.7(10)  |
| C(34)-C(35)-C(36)-C(37) | -161.2(7) |
| O(3)-C(28)-C(37)-C(36)  | 168.7(6)  |
| C(29)-C(28)-C(37)-C(36) | -8.4(10)  |
| O(3)-C(28)-C(37)-C(38)  | -10.3(10) |
| C(29)-C(28)-C(37)-C(38) | 172.6(7)  |
| C(31)-C(36)-C(37)-C(28) | 6.5(10)   |
| C(35)-C(36)-C(37)-C(28) | -169.7(6) |
| C(31)-C(36)-C(37)-C(38) | -174.5(6) |
| C(35)-C(36)-C(37)-C(38) | 9.3(10)   |
| C(28)-C(37)-C(38)-C(39) | 60.8(9)   |

|                             |            |
|-----------------------------|------------|
| C (36)–C (37)–C (38)–C (39) | –118.2 (8) |
| C (28)–C (37)–C (38)–C (47) | –120.0 (8) |
| C (36)–C (37)–C (38)–C (47) | 61.1 (9)   |
| C (47)–C (38)–C (39)–O (4)  | 170.1 (7)  |
| C (37)–C (38)–C (39)–O (4)  | –10.6 (11) |
| C (47)–C (38)–C (39)–C (40) | –7.3 (11)  |
| C (37)–C (38)–C (39)–C (40) | 172.0 (7)  |
| O (4)–C (39)–C (40)–C (41)  | –176.4 (7) |
| C (38)–C (39)–C (40)–C (41) | 1.1 (11)   |
| C (39)–C (40)–C (41)–C (42) | 5.6 (12)   |
| C (40)–C (41)–C (42)–C (47) | –6.0 (12)  |
| C (40)–C (41)–C (42)–C (43) | 176.2 (7)  |
| C (47)–C (42)–C (43)–C (44) | 14.9 (11)  |
| C (41)–C (42)–C (43)–C (44) | –167.4 (8) |
| C (42)–C (43)–C (44)–C (45) | –41.9 (11) |
| C (43)–C (44)–C (45)–C (46) | 61.8 (11)  |
| C (44)–C (45)–C (46)–C (47) | –51.9 (10) |
| C (41)–C (42)–C (47)–C (38) | –0.3 (11)  |
| C (43)–C (42)–C (47)–C (38) | 177.3 (7)  |
| C (41)–C (42)–C (47)–C (46) | 176.2 (7)  |
| C (43)–C (42)–C (47)–C (46) | –6.2 (11)  |
| C (39)–C (38)–C (47)–C (42) | 6.9 (11)   |
| C (37)–C (38)–C (47)–C (42) | –172.4 (7) |
| C (39)–C (38)–C (47)–C (46) | –169.7 (6) |
| C (37)–C (38)–C (47)–C (46) | 11.1 (10)  |
| C (45)–C (46)–C (47)–C (42) | 24.4 (10)  |
| C (45)–C (46)–C (47)–C (38) | –159.1 (7) |
| C (50)–N (3)–C (51)–C (52)  | 160.4 (7)  |
| C (49)–N (3)–C (51)–C (52)  | –78.1 (9)  |
| Pd (2)–N (3)–C (51)–C (52)  | 38.6 (7)   |
| C (54)–N (4)–C (52)–C (51)  | –74.4 (9)  |
| C (53)–N (4)–C (52)–C (51)  | 167.6 (7)  |
| Pd (2)–N (4)–C (52)–C (51)  | 43.5 (8)   |
| N (3)–C (51)–C (52)–N (4)   | –58.0 (9)  |

---

Symmetry transformations used to generate equivalent atoms:

Table 7. Hydrogen bonds for **7b** [A and deg.].

---

| D–H...A | d(D–H) | d(H...A) | d(D...A) | <(DHA) |
|---------|--------|----------|----------|--------|
|---------|--------|----------|----------|--------|

### The X-ray structure of compound 7c

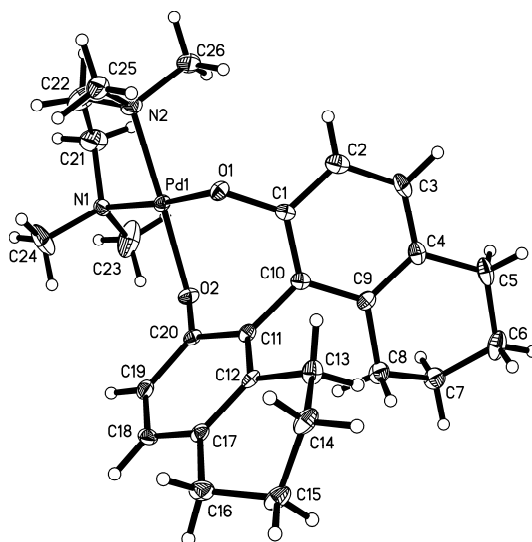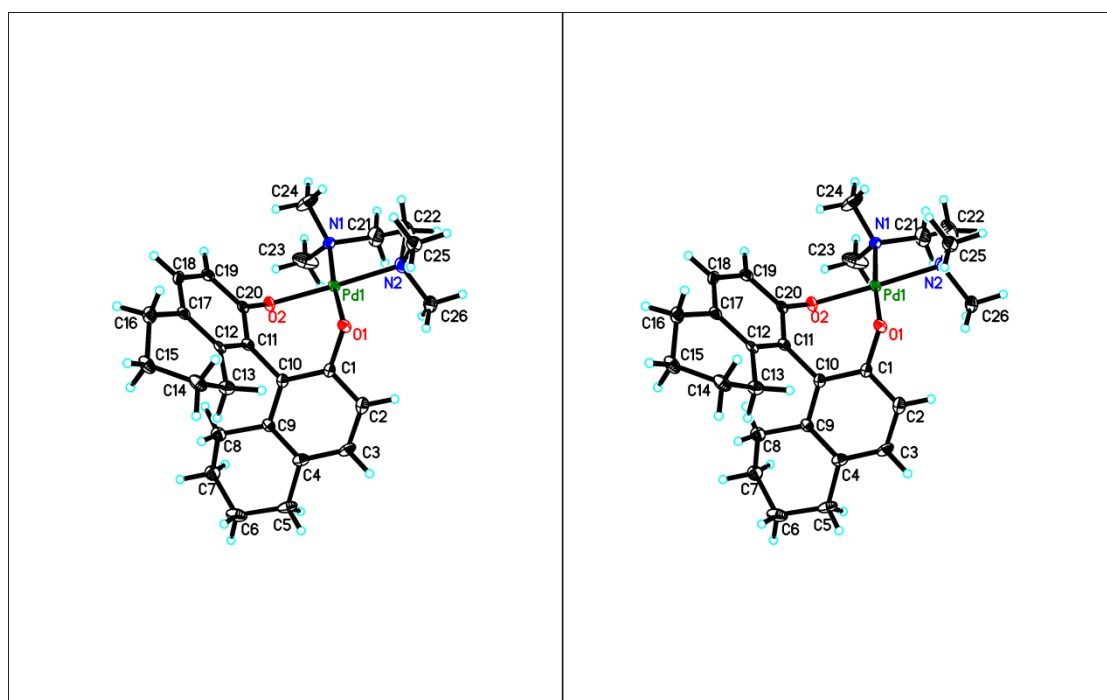

Table 1. Crystal data and structure refinement for **7c**.

|                                   |                                                                                                                  |
|-----------------------------------|------------------------------------------------------------------------------------------------------------------|
| Identification code               | mx1321                                                                                                           |
| Empirical formula                 | C <sub>27</sub> H <sub>37</sub> Cl <sub>3</sub> N <sub>2</sub> O <sub>2</sub> Pd                                 |
| Formula weight                    | 634.34                                                                                                           |
| Temperature                       | 173(2) K                                                                                                         |
| Wavelength                        | 0.71073 Å                                                                                                        |
| Crystal system, space group       | Orthorhombic, P2(1)2(1)2(1)                                                                                      |
| Unit cell dimensions              | a = 9.8418(15) Å    alpha = 90 deg.<br>b = 11.4447(18) Å    beta = 90 deg.<br>c = 24.284(4) Å    gamma = 90 deg. |
| Volume                            | 2735.2(7) Å <sup>3</sup>                                                                                         |
| Z, Calculated density             | 4, 1.540 Mg/m <sup>3</sup>                                                                                       |
| Absorption coefficient            | 0.999 mm <sup>-1</sup>                                                                                           |
| F(000)                            | 1304                                                                                                             |
| Crystal size                      | 0.18 x 0.08 x 0.06 mm                                                                                            |
| Theta range for data collection   | 1.68 to 27.48 deg.                                                                                               |
| Limiting indices                  | -12<=h<=12, -14<=k<=14, -31<=l<=31                                                                               |
| Reflections collected / unique    | 17508 / 6166 [R(int) = 0.0546]                                                                                   |
| Completeness to theta = 27.48     | 99.9 %                                                                                                           |
| Absorption correction             | Semi-empirical from equivalents                                                                                  |
| Max. and min. transmission        | 0.9425 and 0.8406                                                                                                |
| Refinement method                 | Full-matrix least-squares on F <sup>2</sup>                                                                      |
| Data / restraints / parameters    | 6166 / 0 / 320                                                                                                   |
| Goodness-of-fit on F <sup>2</sup> | 1.138                                                                                                            |
| Final R indices [I>2sigma(I)]     | R1 = 0.0514, wR2 = 0.0919                                                                                        |
| R indices (all data)              | R1 = 0.0590, wR2 = 0.0951                                                                                        |
| Absolute structure parameter      | 0.00(4)                                                                                                          |
| Largest diff. peak and hole       | 0.797 and -0.378 e.Å <sup>-3</sup>                                                                               |

Table 2. Atomic coordinates ( $\times 10^4$ ) and equivalent isotropic displacement parameters ( $\text{Å}^2 \times 10^3$ ) for **7c**.  
U(eq) is defined as one third of the trace of the orthogonalized Uij tensor.

|       | x        | y       | z        | U(eq) |
|-------|----------|---------|----------|-------|
| Pd(1) | 589(1)   | 6479(1) | 9992(1)  | 20(1) |
| Cl(1) | 1966(2)  | 1710(1) | 10608(1) | 45(1) |
| Cl(2) | 4348(2)  | 3172(1) | 10509(1) | 52(1) |
| Cl(3) | 3395(2)  | 2442(2) | 11582(1) | 58(1) |
| O(1)  | 1368(3)  | 7526(3) | 9402(1)  | 24(1) |
| O(2)  | 382(3)   | 5063(3) | 9507(1)  | 24(1) |
| N(1)  | -118(4)  | 5513(4) | 10654(2) | 28(1) |
| N(2)  | 686(5)   | 7857(4) | 10536(2) | 29(1) |
| C(1)  | 649(5)   | 7508(4) | 8924(2)  | 19(1) |
| C(2)  | -116(5)  | 8492(5) | 8778(2)  | 29(1) |
| C(3)  | -916(5)  | 8454(5) | 8308(2)  | 30(1) |
| C(4)  | -1002(5) | 7456(5) | 7980(2)  | 26(1) |
| C(5)  | -1961(5) | 7435(5) | 7493(2)  | 35(1) |
| C(6)  | -1871(6) | 6347(6) | 7139(2)  | 41(1) |
| C(7)  | -1660(5) | 5263(5) | 7489(2)  | 33(1) |
| C(8)  | -315(5)  | 5368(5) | 7791(2)  | 30(1) |
| C(9)  | -207(4)  | 6494(4) | 8119(2)  | 21(1) |
| C(10) | 679(5)   | 6541(4) | 8580(2)  | 21(1) |
| C(11) | 1640(4)  | 5578(4) | 8694(2)  | 19(1) |
| C(12) | 2761(5)  | 5378(4) | 8350(2)  | 19(1) |
| C(13) | 3032(5)  | 6186(4) | 7869(2)  | 27(1) |
| C(14) | 4392(5)  | 5989(5) | 7585(2)  | 31(1) |
| C(15) | 4704(5)  | 4714(5) | 7518(2)  | 33(1) |
| C(16) | 4801(5)  | 4142(5) | 8074(2)  | 31(1) |
| C(17) | 3611(5)  | 4413(4) | 8445(2)  | 22(1) |
| C(18) | 3337(5)  | 3677(4) | 8889(2)  | 25(1) |
| C(19) | 2275(5)  | 3902(4) | 9245(2)  | 25(1) |
| C(20) | 1424(5)  | 4867(4) | 9162(2)  | 19(1) |
| C(21) | -610(8)  | 6411(6) | 11051(2) | 54(2) |
| C(22) | 285(7)   | 7377(6) | 11091(3) | 54(2) |
| C(23) | -1270(7) | 4737(7) | 10538(3) | 61(2) |
| C(24) | 978(7)   | 4794(6) | 10863(3) | 56(2) |
| C(25) | 2067(5)  | 8342(5) | 10583(2) | 37(1) |
| C(26) | -268(6)  | 8767(5) | 10362(2) | 44(2) |
| C(27) | 3586(6)  | 2045(5) | 10886(2) | 34(1) |

Table 3. Bond lengths [Å] and angles [deg] for **7c**.

---

|             |          |
|-------------|----------|
| Pd(1)–O(2)  | 2.013(3) |
| Pd(1)–O(1)  | 2.020(3) |
| Pd(1)–N(2)  | 2.060(4) |
| Pd(1)–N(1)  | 2.071(4) |
| Cl(1)–C(27) | 1.774(6) |
| Cl(2)–C(27) | 1.752(6) |
| Cl(3)–C(27) | 1.759(6) |
| O(1)–C(1)   | 1.358(6) |
| O(2)–C(20)  | 1.343(5) |
| N(1)–C(24)  | 1.448(7) |
| N(1)–C(23)  | 1.467(8) |
| N(1)–C(21)  | 1.491(7) |
| N(2)–C(26)  | 1.465(7) |
| N(2)–C(25)  | 1.472(7) |
| N(2)–C(22)  | 1.507(7) |
| C(1)–C(10)  | 1.388(6) |
| C(1)–C(2)   | 1.400(7) |
| C(2)–C(3)   | 1.388(7) |
| C(2)–H(2)   | 0.9500   |
| C(3)–C(4)   | 1.395(7) |
| C(3)–H(3)   | 0.9500   |
| C(4)–C(9)   | 1.392(7) |
| C(4)–C(5)   | 1.513(7) |
| C(5)–C(6)   | 1.515(8) |
| C(5)–H(5A)  | 0.9900   |
| C(5)–H(5B)  | 0.9900   |
| C(6)–C(7)   | 1.518(7) |
| C(6)–H(6A)  | 0.9900   |
| C(6)–H(6B)  | 0.9900   |
| C(7)–C(8)   | 1.518(7) |
| C(7)–H(7A)  | 0.9900   |
| C(7)–H(7B)  | 0.9900   |
| C(8)–C(9)   | 1.519(7) |
| C(8)–H(8A)  | 0.9900   |
| C(8)–H(8B)  | 0.9900   |
| C(9)–C(10)  | 1.418(6) |
| C(10)–C(11) | 1.479(6) |
| C(11)–C(12) | 1.403(6) |
| C(11)–C(20) | 1.414(6) |
| C(12)–C(17) | 1.404(6) |
| C(12)–C(13) | 1.514(6) |
| C(13)–C(14) | 1.523(7) |



|                     |             |
|---------------------|-------------|
| C (13)–H (13B)      | 0.9900      |
| C (13)–H (13A)      | 0.9900      |
| C (14)–C (15)       | 1.500 (7)   |
| C (14)–H (14A)      | 0.9900      |
| C (14)–H (14B)      | 0.9900      |
| C (15)–C (16)       | 1.504 (7)   |
| C (15)–H (15B)      | 0.9900      |
| C (15)–H (15A)      | 0.9900      |
| C (16)–C (17)       | 1.510 (6)   |
| C (16)–H (16B)      | 0.9900      |
| C (16)–H (16A)      | 0.9900      |
| C (17)–C (18)       | 1.393 (7)   |
| C (18)–C (19)       | 1.381 (7)   |
| C (18)–H (18)       | 0.9500      |
| C (19)–C (20)       | 1.401 (7)   |
| C (19)–H (19)       | 0.9500      |
| C (21)–C (22)       | 1.417 (10)  |
| C (21)–H (21A)      | 0.9900      |
| C (21)–H (21B)      | 0.9900      |
| C (22)–H (22A)      | 0.9900      |
| C (22)–H (22B)      | 0.9900      |
| C (23)–H (23B)      | 0.9800      |
| C (23)–H (23C)      | 0.9800      |
| C (23)–H (23A)      | 0.9800      |
| C (24)–H (24A)      | 0.9800      |
| C (24)–H (24C)      | 0.9800      |
| C (24)–H (24B)      | 0.9800      |
| C (25)–H (25B)      | 0.9800      |
| C (25)–H (25C)      | 0.9800      |
| C (25)–H (25A)      | 0.9800      |
| C (26)–H (26A)      | 0.9800      |
| C (26)–H (26C)      | 0.9800      |
| C (26)–H (26B)      | 0.9800      |
| C (27)–H (27)       | 1.0000      |
|                     |             |
| O (2)–Pd (1)–O (1)  | 95.75 (13)  |
| O (2)–Pd (1)–N (2)  | 174.99 (15) |
| O (1)–Pd (1)–N (2)  | 89.06 (15)  |
| O (2)–Pd (1)–N (1)  | 89.46 (16)  |
| O (1)–Pd (1)–N (1)  | 174.33 (15) |
| N (2)–Pd (1)–N (1)  | 85.80 (17)  |
| C (1)–O (1)–Pd (1)  | 113.5 (3)   |
| C (20)–O (2)–Pd (1) | 115.0 (3)   |
| C (24)–N (1)–C (23) | 107.4 (5)   |

|                     |           |
|---------------------|-----------|
| C (24)–N(1)–C (21)  | 114.0 (5) |
| C (23)–N(1)–C (21)  | 106.9 (5) |
| C (24)–N(1)–Pd (1)  | 108.9 (4) |
| C (23)–N(1)–Pd (1)  | 115.7 (3) |
| C (21)–N(1)–Pd (1)  | 104.1 (3) |
| C (26)–N(2)–C (25)  | 110.3 (4) |
| C (26)–N(2)–C (22)  | 110.4 (5) |
| C (25)–N(2)–C (22)  | 108.1 (5) |
| C (26)–N(2)–Pd (1)  | 109.2 (3) |
| C (25)–N(2)–Pd (1)  | 112.4 (3) |
| C (22)–N(2)–Pd (1)  | 106.4 (3) |
| O (1)–C (1)–C (10)  | 121.0 (4) |
| O (1)–C (1)–C (2)   | 119.0 (4) |
| C (10)–C (1)–C (2)  | 120.0 (5) |
| C (3)–C (2)–C (1)   | 119.3 (5) |
| C (3)–C (2)–H (2)   | 120.4     |
| C (1)–C (2)–H (2)   | 120.4     |
| C (2)–C (3)–C (4)   | 121.9 (5) |
| C (2)–C (3)–H (3)   | 119.0     |
| C (4)–C (3)–H (3)   | 119.0     |
| C (9)–C (4)–C (3)   | 118.4 (4) |
| C (9)–C (4)–C (5)   | 121.9 (5) |
| C (3)–C (4)–C (5)   | 119.8 (5) |
| C (4)–C (5)–C (6)   | 114.8 (4) |
| C (4)–C (5)–H (5A)  | 108.6     |
| C (6)–C (5)–H (5A)  | 108.6     |
| C (4)–C (5)–H (5B)  | 108.6     |
| C (6)–C (5)–H (5B)  | 108.6     |
| H (5A)–C (5)–H (5B) | 107.5     |
| C (5)–C (6)–C (7)   | 111.2 (4) |
| C (5)–C (6)–H (6A)  | 109.4     |
| C (7)–C (6)–H (6A)  | 109.4     |
| C (5)–C (6)–H (6B)  | 109.4     |
| C (7)–C (6)–H (6B)  | 109.4     |
| H (6A)–C (6)–H (6B) | 108.0     |
| C (6)–C (7)–C (8)   | 109.0 (4) |
| C (6)–C (7)–H (7A)  | 109.9     |
| C (8)–C (7)–H (7A)  | 109.9     |
| C (6)–C (7)–H (7B)  | 109.9     |
| C (8)–C (7)–H (7B)  | 109.9     |
| H (7A)–C (7)–H (7B) | 108.3     |
| C (7)–C (8)–C (9)   | 112.5 (4) |
| C (7)–C (8)–H (8A)  | 109.1     |
| C (9)–C (8)–H (8A)  | 109.1     |

|                      |            |
|----------------------|------------|
| C (7)–C (8)–H(8B)    | 109. 1     |
| C (9)–C (8)–H(8B)    | 109. 1     |
| H(8A)–C (8)–H(8B)    | 107. 8     |
| C (4)–C (9)–C (10)   | 120. 4 (4) |
| C (4)–C (9)–C (8)    | 120. 3 (4) |
| C (10)–C (9)–C (8)   | 119. 3 (4) |
| C (1)–C (10)–C (9)   | 119. 5 (4) |
| C (1)–C (10)–C (11)  | 119. 6 (4) |
| C (9)–C (10)–C (11)  | 120. 9 (4) |
| C (12)–C (11)–C (20) | 120. 2 (4) |
| C (12)–C (11)–C (10) | 120. 9 (4) |
| C (20)–C (11)–C (10) | 118. 9 (4) |
| C (11)–C (12)–C (17) | 120. 0 (4) |
| C (11)–C (12)–C (13) | 119. 9 (4) |
| C (17)–C (12)–C (13) | 120. 2 (4) |
| C (12)–C (13)–C (14) | 114. 4 (4) |
| C (12)–C (13)–H(13B) | 108. 7     |
| C (14)–C (13)–H(13B) | 108. 7     |
| C (12)–C (13)–H(13A) | 108. 7     |
| C (14)–C (13)–H(13A) | 108. 7     |
| H(13B)–C (13)–H(13A) | 107. 6     |
| C (15)–C (14)–C (13) | 111. 9 (4) |
| C (15)–C (14)–H(14A) | 109. 2     |
| C (13)–C (14)–H(14A) | 109. 2     |
| C (15)–C (14)–H(14B) | 109. 2     |
| C (13)–C (14)–H(14B) | 109. 2     |
| H(14A)–C (14)–H(14B) | 107. 9     |
| C (14)–C (15)–C (16) | 109. 8 (4) |
| C (14)–C (15)–H(15B) | 109. 7     |
| C (16)–C (15)–H(15B) | 109. 7     |
| C (14)–C (15)–H(15A) | 109. 7     |
| C (16)–C (15)–H(15A) | 109. 7     |
| H(15B)–C (15)–H(15A) | 108. 2     |
| C (15)–C (16)–C (17) | 113. 4 (4) |
| C (15)–C (16)–H(16B) | 108. 9     |
| C (17)–C (16)–H(16B) | 108. 9     |
| C (15)–C (16)–H(16A) | 108. 9     |
| C (17)–C (16)–H(16A) | 108. 9     |
| H(16B)–C (16)–H(16A) | 107. 7     |
| C (18)–C (17)–C (12) | 119. 1 (4) |
| C (18)–C (17)–C (16) | 119. 2 (4) |
| C (12)–C (17)–C (16) | 121. 7 (4) |
| C (19)–C (18)–C (17) | 121. 2 (4) |
| C (19)–C (18)–H(18)  | 119. 4     |

|                        |            |
|------------------------|------------|
| C (17)–C (18)–H (18)   | 119. 4     |
| C (18)–C (19)–C (20)   | 120. 7 (5) |
| C (18)–C (19)–H (19)   | 119. 7     |
| C (20)–C (19)–H (19)   | 119. 7     |
| O (2)–C (20)–C (19)    | 119. 9 (4) |
| O (2)–C (20)–C (11)    | 121. 4 (4) |
| C (19)–C (20)–C (11)   | 118. 6 (4) |
| C (22)–C (21)–N (1)    | 112. 3 (5) |
| C (22)–C (21)–H (21A)  | 109. 1     |
| N (1)–C (21)–H (21A)   | 109. 1     |
| C (22)–C (21)–H (21B)  | 109. 1     |
| N (1)–C (21)–H (21B)   | 109. 1     |
| H (21A)–C (21)–H (21B) | 107. 9     |
| C (21)–C (22)–N (2)    | 112. 7 (5) |
| C (21)–C (22)–H (22A)  | 109. 0     |
| N (2)–C (22)–H (22A)   | 109. 0     |
| C (21)–C (22)–H (22B)  | 109. 0     |
| N (2)–C (22)–H (22B)   | 109. 0     |
| H (22A)–C (22)–H (22B) | 107. 8     |
| N (1)–C (23)–H (23B)   | 109. 5     |
| N (1)–C (23)–H (23C)   | 109. 5     |
| H (23B)–C (23)–H (23C) | 109. 5     |
| N (1)–C (23)–H (23A)   | 109. 5     |
| H (23B)–C (23)–H (23A) | 109. 5     |
| H (23C)–C (23)–H (23A) | 109. 5     |
| N (1)–C (24)–H (24A)   | 109. 5     |
| N (1)–C (24)–H (24C)   | 109. 5     |
| H (24A)–C (24)–H (24C) | 109. 5     |
| N (1)–C (24)–H (24B)   | 109. 5     |
| H (24A)–C (24)–H (24B) | 109. 5     |
| H (24C)–C (24)–H (24B) | 109. 5     |
| N (2)–C (25)–H (25B)   | 109. 5     |
| N (2)–C (25)–H (25C)   | 109. 5     |
| H (25B)–C (25)–H (25C) | 109. 5     |
| N (2)–C (25)–H (25A)   | 109. 5     |
| H (25B)–C (25)–H (25A) | 109. 5     |
| H (25C)–C (25)–H (25A) | 109. 5     |
| N (2)–C (26)–H (26A)   | 109. 5     |
| N (2)–C (26)–H (26C)   | 109. 5     |
| H (26A)–C (26)–H (26C) | 109. 5     |
| N (2)–C (26)–H (26B)   | 109. 5     |
| H (26A)–C (26)–H (26B) | 109. 5     |
| H (26C)–C (26)–H (26B) | 109. 5     |
| Cl (2)–C (27)–Cl (3)   | 111. 0 (3) |

|                      |           |
|----------------------|-----------|
| C1 (2)-C (27)-C1 (1) | 110.2 (3) |
| C1 (3)-C (27)-C1 (1) | 109.0 (3) |
| C1 (2)-C (27)-H (27) | 108.9     |
| C1 (3)-C (27)-H (27) | 108.9     |
| C1 (1)-C (27)-H (27) | 108.9     |

---

Symmetry transformations used to generate equivalent atoms:

Table 4. Anisotropic displacement parameters ( $\text{\AA}^2 \times 10^3$ ) for **7c**.

The anisotropic displacement factor exponent takes the form:

$$-2 \pi^2 [ h^2 a^{*2} U_{11} + \dots + 2 h k a^* b^* U_{12} ]$$

|       | U11   | U22   | U33   | U23    | U13    | U12    |
|-------|-------|-------|-------|--------|--------|--------|
| Pd(1) | 21(1) | 24(1) | 15(1) | -2(1)  | 2(1)   | 2(1)   |
| Cl(1) | 38(1) | 38(1) | 59(1) | -6(1)  | -5(1)  | 0(1)   |
| Cl(2) | 43(1) | 46(1) | 68(1) | 13(1)  | 9(1)   | -3(1)  |
| Cl(3) | 63(1) | 69(1) | 42(1) | -5(1)  | -2(1)  | 6(1)   |
| O(1)  | 26(2) | 27(2) | 18(2) | -1(2)  | 2(1)   | -3(2)  |
| O(2)  | 29(2) | 22(2) | 21(2) | -5(1)  | 6(1)   | -2(2)  |
| N(1)  | 40(2) | 27(2) | 16(2) | 3(2)   | 3(2)   | 12(2)  |
| N(2)  | 38(2) | 29(2) | 20(2) | -5(2)  | 5(2)   | 2(2)   |
| C(1)  | 18(2) | 17(2) | 22(2) | 2(2)   | 10(2)  | -2(2)  |
| C(2)  | 34(3) | 23(2) | 30(2) | 0(2)   | 14(2)  | -1(2)  |
| C(3)  | 27(3) | 30(3) | 32(3) | 16(2)  | 6(2)   | 7(2)   |
| C(4)  | 21(2) | 33(3) | 26(2) | 9(2)   | 3(2)   | 0(2)   |
| C(5)  | 24(3) | 45(3) | 38(3) | 17(3)  | -7(2)  | 5(3)   |
| C(6)  | 31(3) | 64(4) | 29(3) | 6(3)   | -10(2) | -4(3)  |
| C(7)  | 25(3) | 40(3) | 34(3) | -4(2)  | -3(2)  | 2(3)   |
| C(8)  | 21(3) | 38(3) | 31(3) | -5(2)  | -6(2)  | 0(2)   |
| C(9)  | 20(2) | 26(2) | 18(2) | -1(2)  | 3(2)   | -4(2)  |
| C(10) | 22(2) | 20(2) | 22(2) | 0(2)   | 5(2)   | -2(2)  |
| C(11) | 17(2) | 24(2) | 16(2) | -1(2)  | 2(2)   | -3(2)  |
| C(12) | 22(2) | 23(2) | 12(2) | -4(2)  | 0(2)   | -6(2)  |
| C(13) | 23(2) | 36(3) | 21(2) | 6(2)   | 6(2)   | -3(2)  |
| C(14) | 28(3) | 46(3) | 20(2) | -4(2)  | 4(2)   | -11(3) |
| C(15) | 22(3) | 51(3) | 24(2) | -11(2) | 5(2)   | -5(2)  |
| C(16) | 24(3) | 36(3) | 31(3) | -6(2)  | 7(2)   | 5(2)   |
| C(17) | 17(2) | 28(3) | 20(2) | -7(2)  | -4(2)  | -1(2)  |
| C(18) | 24(2) | 18(2) | 33(2) | -7(2)  | -7(2)  | 3(2)   |
| C(19) | 32(3) | 22(2) | 20(2) | 0(2)   | -6(2)  | -4(2)  |
| C(20) | 22(2) | 21(2) | 13(2) | -2(2)  | 5(2)   | -3(2)  |
| C(21) | 88(5) | 46(3) | 28(3) | 3(3)   | 23(3)  | 9(4)   |
| C(22) | 65(5) | 68(5) | 28(3) | -18(3) | 15(3)  | -2(4)  |
| C(23) | 55(4) | 92(6) | 35(3) | 26(4)  | -3(3)  | -36(4) |
| C(24) | 54(4) | 52(4) | 61(4) | 32(4)  | 7(3)   | 22(4)  |
| C(25) | 36(3) | 37(3) | 38(3) | -6(3)  | -8(2)  | 1(3)   |
| C(26) | 50(4) | 44(4) | 38(3) | -16(3) | -2(3)  | 22(3)  |
| C(27) | 32(3) | 28(3) | 41(3) | 4(2)   | -1(2)  | 10(2)  |

Table 5. Hydrogen coordinates ( $\times 10^4$ ) and isotropic displacement parameters ( $\text{Å}^2 \times 10^3$ ) for **7c**.

|        | x     | y    | z     | U(eq) |
|--------|-------|------|-------|-------|
| H(2)   | -87   | 9177 | 8998  | 35    |
| H(3)   | -1419 | 9129 | 8206  | 36    |
| H(5A)  | -1772 | 8124 | 7259  | 42    |
| H(5B)  | -2903 | 7510 | 7631  | 42    |
| H(6A)  | -1106 | 6428 | 6877  | 50    |
| H(6B)  | -2718 | 6263 | 6923  | 50    |
| H(7A)  | -1654 | 4560 | 7252  | 39    |
| H(7B)  | -2412 | 5185 | 7757  | 39    |
| H(8A)  | 436   | 5336 | 7521  | 36    |
| H(8B)  | -212  | 4696 | 8044  | 36    |
| H(13B) | 2994  | 7003 | 8001  | 32    |
| H(13A) | 2297  | 6084 | 7595  | 32    |
| H(14A) | 4377  | 6366 | 7218  | 38    |
| H(14B) | 5120  | 6361 | 7805  | 38    |
| H(15B) | 5574  | 4620 | 7318  | 39    |
| H(15A) | 3979  | 4335 | 7298  | 39    |
| H(16B) | 5647  | 4403 | 8256  | 37    |
| H(16A) | 4861  | 3285 | 8023  | 37    |
| H(18)  | 3892  | 3010 | 8948  | 30    |
| H(19)  | 2119  | 3397 | 9548  | 30    |
| H(21A) | -1516 | 6690 | 10933 | 65    |
| H(21B) | -711  | 6049 | 11419 | 65    |
| H(22A) | 1113  | 7134 | 11292 | 65    |
| H(22B) | -159  | 8003 | 11307 | 65    |
| H(23B) | -2054 | 5204 | 10422 | 91    |
| H(23C) | -1502 | 4296 | 10870 | 91    |
| H(23A) | -1022 | 4193 | 10243 | 91    |
| H(24A) | 1221  | 4204 | 10587 | 84    |
| H(24C) | 686   | 4406 | 11202 | 84    |
| H(24B) | 1770  | 5287 | 10940 | 84    |
| H(25B) | 2696  | 7725 | 10699 | 56    |
| H(25C) | 2071  | 8973 | 10856 | 56    |
| H(25A) | 2354  | 8650 | 10225 | 56    |
| H(26A) | -13   | 9051 | 9996  | 66    |
| H(26C) | -242  | 9415 | 10625 | 66    |
| H(26B) | -1189 | 8442 | 10349 | 66    |
| H(27)  | 4174  | 1334 | 10864 | 40    |

Table 6. Torsion angles [deg] for **7c**.

|                       |            |
|-----------------------|------------|
| O(2)-Pd(1)-O(1)-C(1)  | 48.5(3)    |
| N(2)-Pd(1)-O(1)-C(1)  | -130.0(3)  |
| N(1)-Pd(1)-O(1)-C(1)  | -154.8(15) |
| O(1)-Pd(1)-O(2)-C(20) | 41.4(3)    |
| N(2)-Pd(1)-O(2)-C(20) | -155.2(18) |
| N(1)-Pd(1)-O(2)-C(20) | -136.3(3)  |
| O(2)-Pd(1)-N(1)-C(24) | 79.4(4)    |
| O(1)-Pd(1)-N(1)-C(24) | -77.3(17)  |
| N(2)-Pd(1)-N(1)-C(24) | -102.2(4)  |
| O(2)-Pd(1)-N(1)-C(23) | -41.6(5)   |
| O(1)-Pd(1)-N(1)-C(23) | 161.6(14)  |
| N(2)-Pd(1)-N(1)-C(23) | 136.7(5)   |
| O(2)-Pd(1)-N(1)-C(21) | -158.6(4)  |
| O(1)-Pd(1)-N(1)-C(21) | 44.7(17)   |
| N(2)-Pd(1)-N(1)-C(21) | 19.8(4)    |
| O(2)-Pd(1)-N(2)-C(26) | -97.0(19)  |
| O(1)-Pd(1)-N(2)-C(26) | 66.4(4)    |
| N(1)-Pd(1)-N(2)-C(26) | -115.9(4)  |
| O(2)-Pd(1)-N(2)-C(25) | 140.3(18)  |
| O(1)-Pd(1)-N(2)-C(25) | -56.3(4)   |
| N(1)-Pd(1)-N(2)-C(25) | 121.3(4)   |
| O(2)-Pd(1)-N(2)-C(22) | 22(2)      |
| O(1)-Pd(1)-N(2)-C(22) | -174.4(4)  |
| N(1)-Pd(1)-N(2)-C(22) | 3.2(4)     |
| Pd(1)-O(1)-C(1)-C(10) | -72.1(5)   |
| Pd(1)-O(1)-C(1)-C(2)  | 108.9(4)   |
| O(1)-C(1)-C(2)-C(3)   | -176.3(4)  |
| C(10)-C(1)-C(2)-C(3)  | 4.7(7)     |
| C(1)-C(2)-C(3)-C(4)   | 1.2(7)     |
| C(2)-C(3)-C(4)-C(9)   | -3.1(7)    |
| C(2)-C(3)-C(4)-C(5)   | 175.9(5)   |
| C(9)-C(4)-C(5)-C(6)   | -6.3(7)    |
| C(3)-C(4)-C(5)-C(6)   | 174.7(5)   |
| C(4)-C(5)-C(6)-C(7)   | 38.6(6)    |
| C(5)-C(6)-C(7)-C(8)   | -62.6(6)   |
| C(6)-C(7)-C(8)-C(9)   | 53.9(6)    |
| C(3)-C(4)-C(9)-C(10)  | -0.8(7)    |
| C(5)-C(4)-C(9)-C(10)  | -179.8(4)  |
| C(3)-C(4)-C(9)-C(8)   | 177.1(4)   |
| C(5)-C(4)-C(9)-C(8)   | -1.9(7)    |
| C(7)-C(8)-C(9)-C(4)   | -22.5(6)   |
| C(7)-C(8)-C(9)-C(10)  | 155.4(4)   |



|                         |           |
|-------------------------|-----------|
| O(1)-C(1)-C(10)-C(9)    | 172.5(4)  |
| C(2)-C(1)-C(10)-C(9)    | -8.5(7)   |
| O(1)-C(1)-C(10)-C(11)   | -7.9(7)   |
| C(2)-C(1)-C(10)-C(11)   | 171.1(4)  |
| C(4)-C(9)-C(10)-C(1)    | 6.6(6)    |
| C(8)-C(9)-C(10)-C(1)    | -171.3(4) |
| C(4)-C(9)-C(10)-C(11)   | -173.0(4) |
| C(8)-C(9)-C(10)-C(11)   | 9.1(6)    |
| C(1)-C(10)-C(11)-C(12)  | -109.8(5) |
| C(9)-C(10)-C(11)-C(12)  | 69.7(6)   |
| C(1)-C(10)-C(11)-C(20)  | 69.3(6)   |
| C(9)-C(10)-C(11)-C(20)  | -111.1(5) |
| C(20)-C(11)-C(12)-C(17) | 5.1(7)    |
| C(10)-C(11)-C(12)-C(17) | -175.8(4) |
| C(20)-C(11)-C(12)-C(13) | -176.5(4) |
| C(10)-C(11)-C(12)-C(13) | 2.7(6)    |
| C(11)-C(12)-C(13)-C(14) | 170.8(4)  |
| C(17)-C(12)-C(13)-C(14) | -10.7(6)  |
| C(12)-C(13)-C(14)-C(15) | 41.9(6)   |
| C(13)-C(14)-C(15)-C(16) | -61.8(6)  |
| C(14)-C(15)-C(16)-C(17) | 49.7(6)   |
| C(11)-C(12)-C(17)-C(18) | -1.2(7)   |
| C(13)-C(12)-C(17)-C(18) | -179.6(4) |
| C(11)-C(12)-C(17)-C(16) | 177.9(4)  |
| C(13)-C(12)-C(17)-C(16) | -0.5(7)   |
| C(15)-C(16)-C(17)-C(18) | 159.7(4)  |
| C(15)-C(16)-C(17)-C(12) | -19.4(7)  |
| C(12)-C(17)-C(18)-C(19) | -2.0(7)   |
| C(16)-C(17)-C(18)-C(19) | 178.9(4)  |
| C(17)-C(18)-C(19)-C(20) | 1.2(7)    |
| Pd(1)-O(2)-C(20)-C(19)  | 110.8(4)  |
| Pd(1)-O(2)-C(20)-C(11)  | -72.9(5)  |
| C(18)-C(19)-C(20)-O(2)  | 179.0(4)  |
| C(18)-C(19)-C(20)-C(11) | 2.6(7)    |
| C(12)-C(11)-C(20)-O(2)  | 177.9(4)  |
| C(10)-C(11)-C(20)-O(2)  | -1.2(7)   |
| C(12)-C(11)-C(20)-C(19) | -5.7(7)   |
| C(10)-C(11)-C(20)-C(19) | 175.1(4)  |
| C(24)-N(1)-C(21)-C(22)  | 76.4(7)   |
| C(23)-N(1)-C(21)-C(22)  | -165.0(6) |
| Pd(1)-N(1)-C(21)-C(22)  | -42.2(6)  |
| N(1)-C(21)-C(22)-N(2)   | 49.0(8)   |
| C(26)-N(2)-C(22)-C(21)  | 90.1(7)   |
| C(25)-N(2)-C(22)-C(21)  | -149.2(6) |

Pd(1)-N(2)-C(22)-C(21) -28.3(7)

---

Symmetry transformations used to generate equivalent atoms:

Table 7. Hydrogen bonds for **7c** [A and deg.].

---

| D-H...A | d(D-H) | d(H...A) | d(D...A) | <(DHA) |
|---------|--------|----------|----------|--------|
|---------|--------|----------|----------|--------|

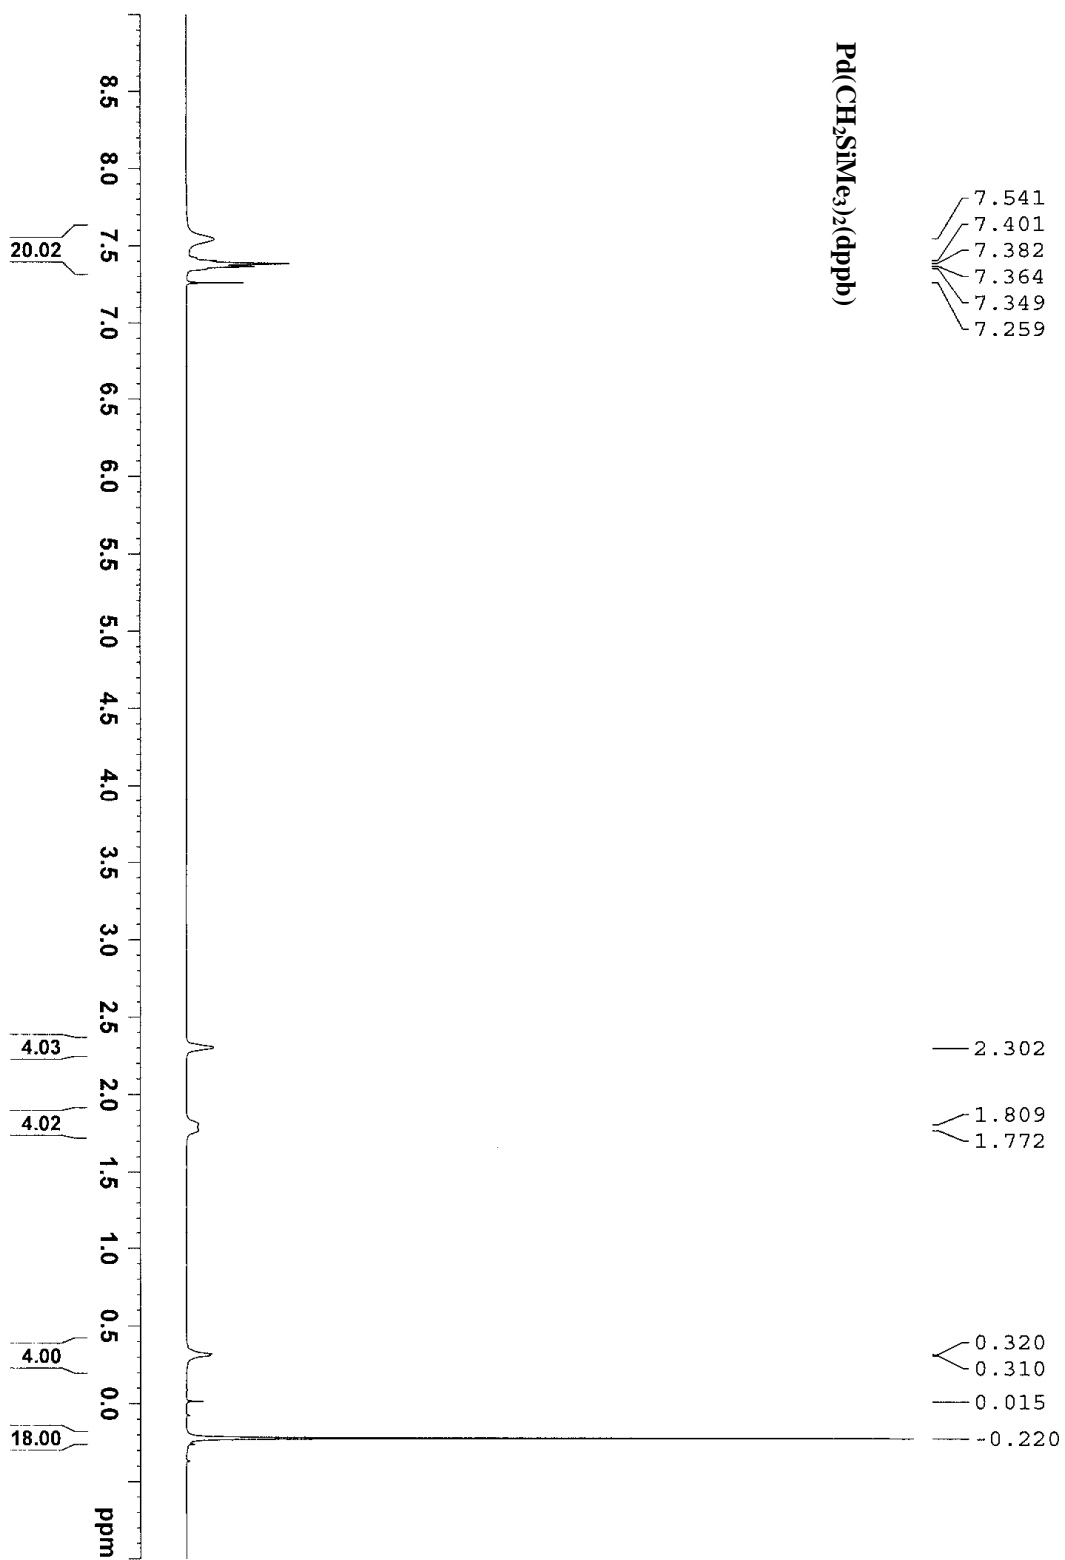

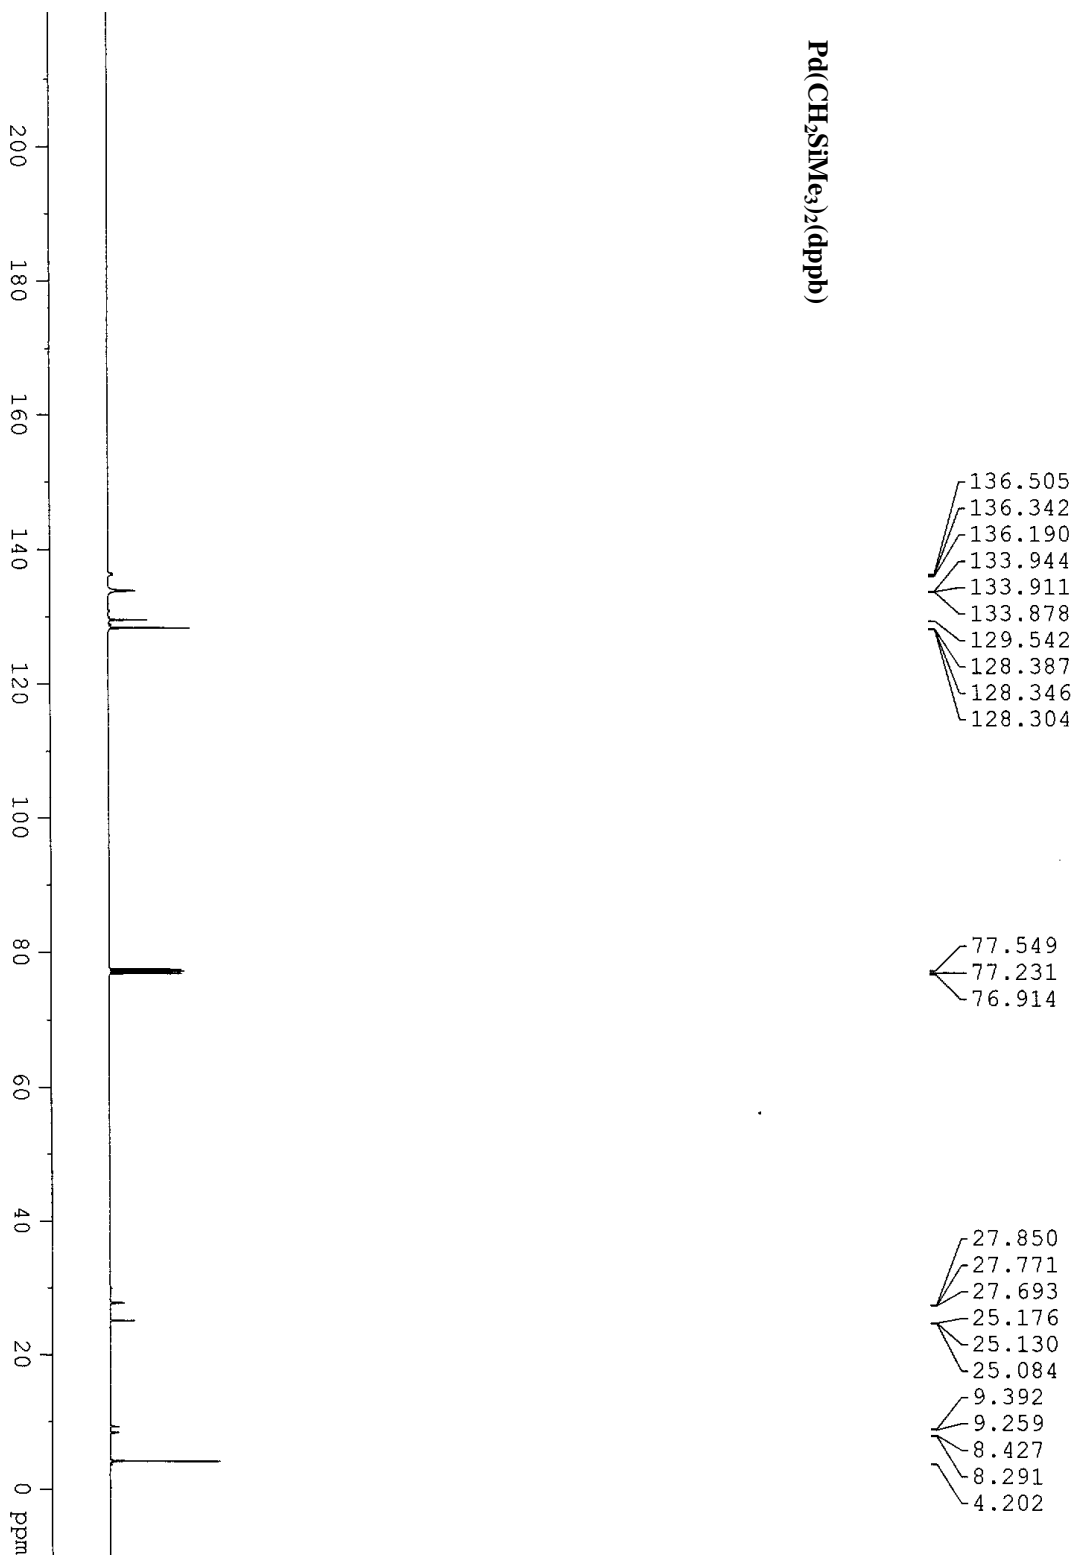

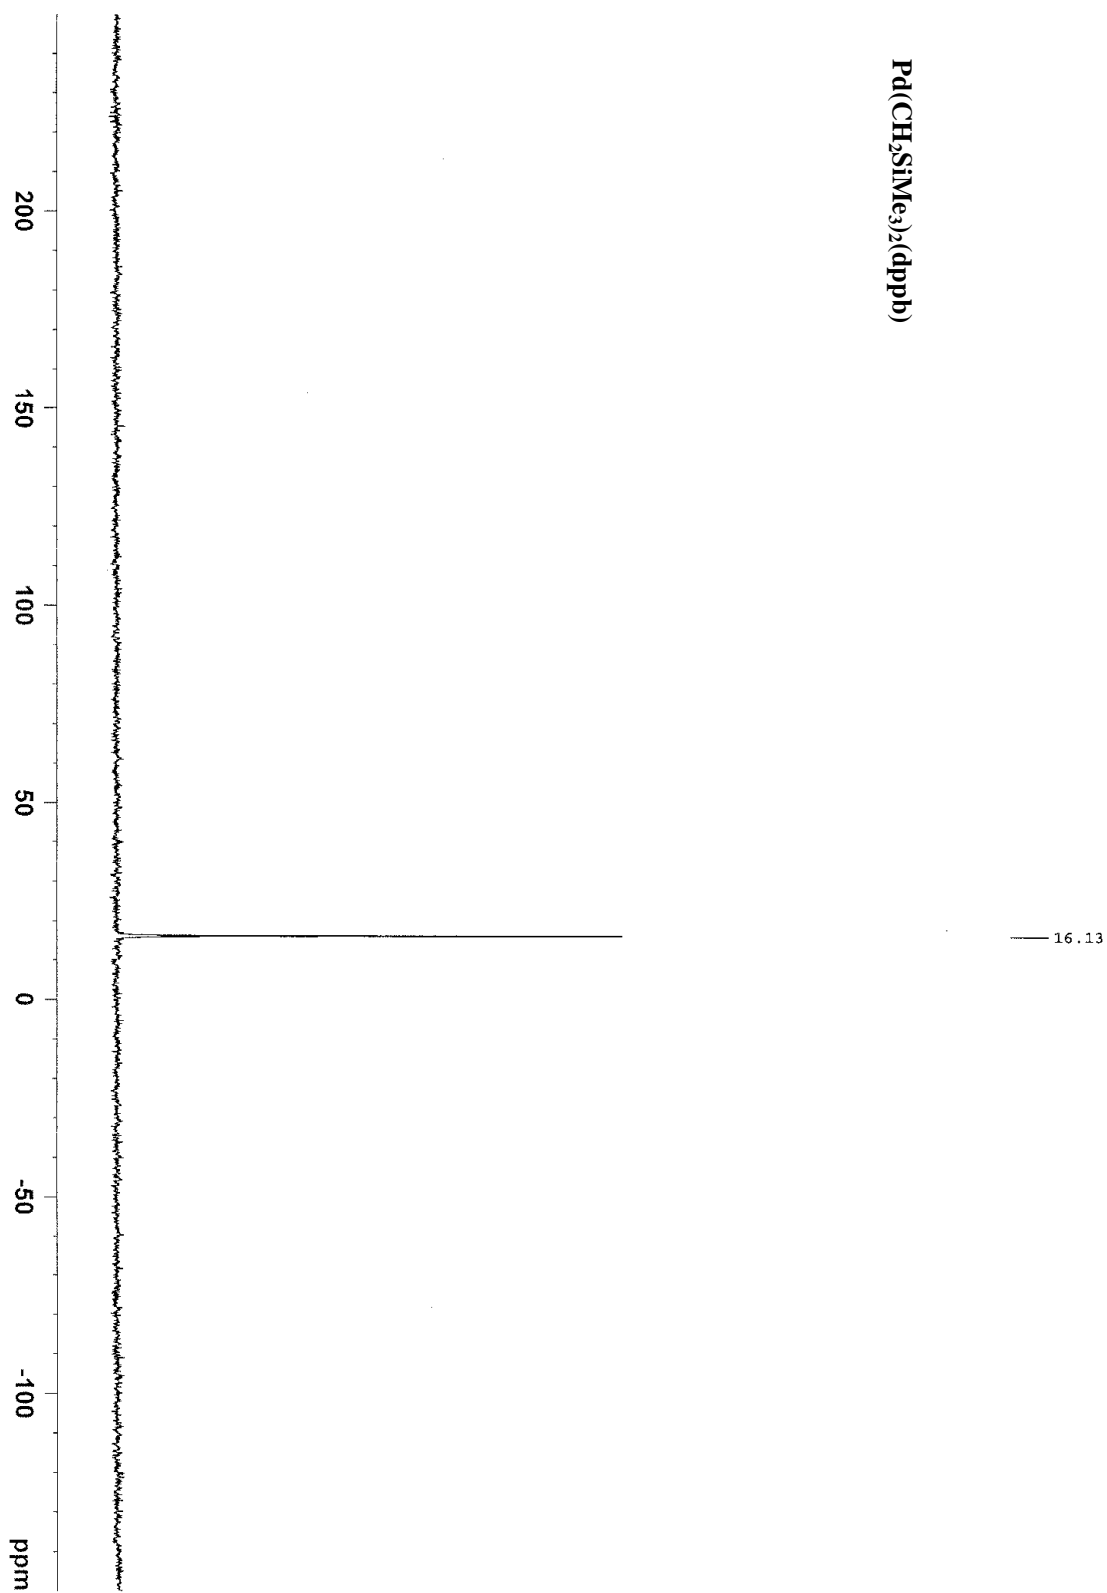

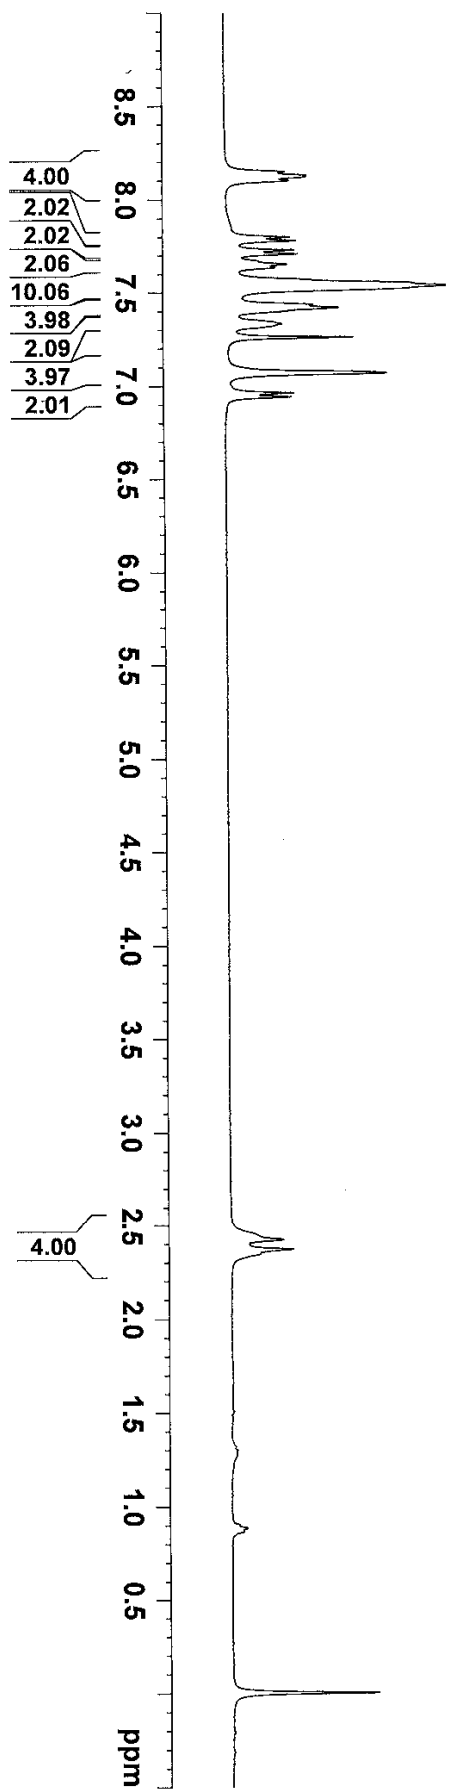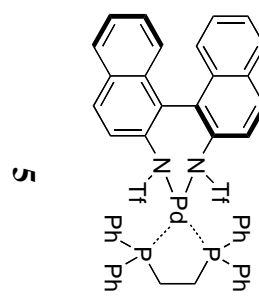

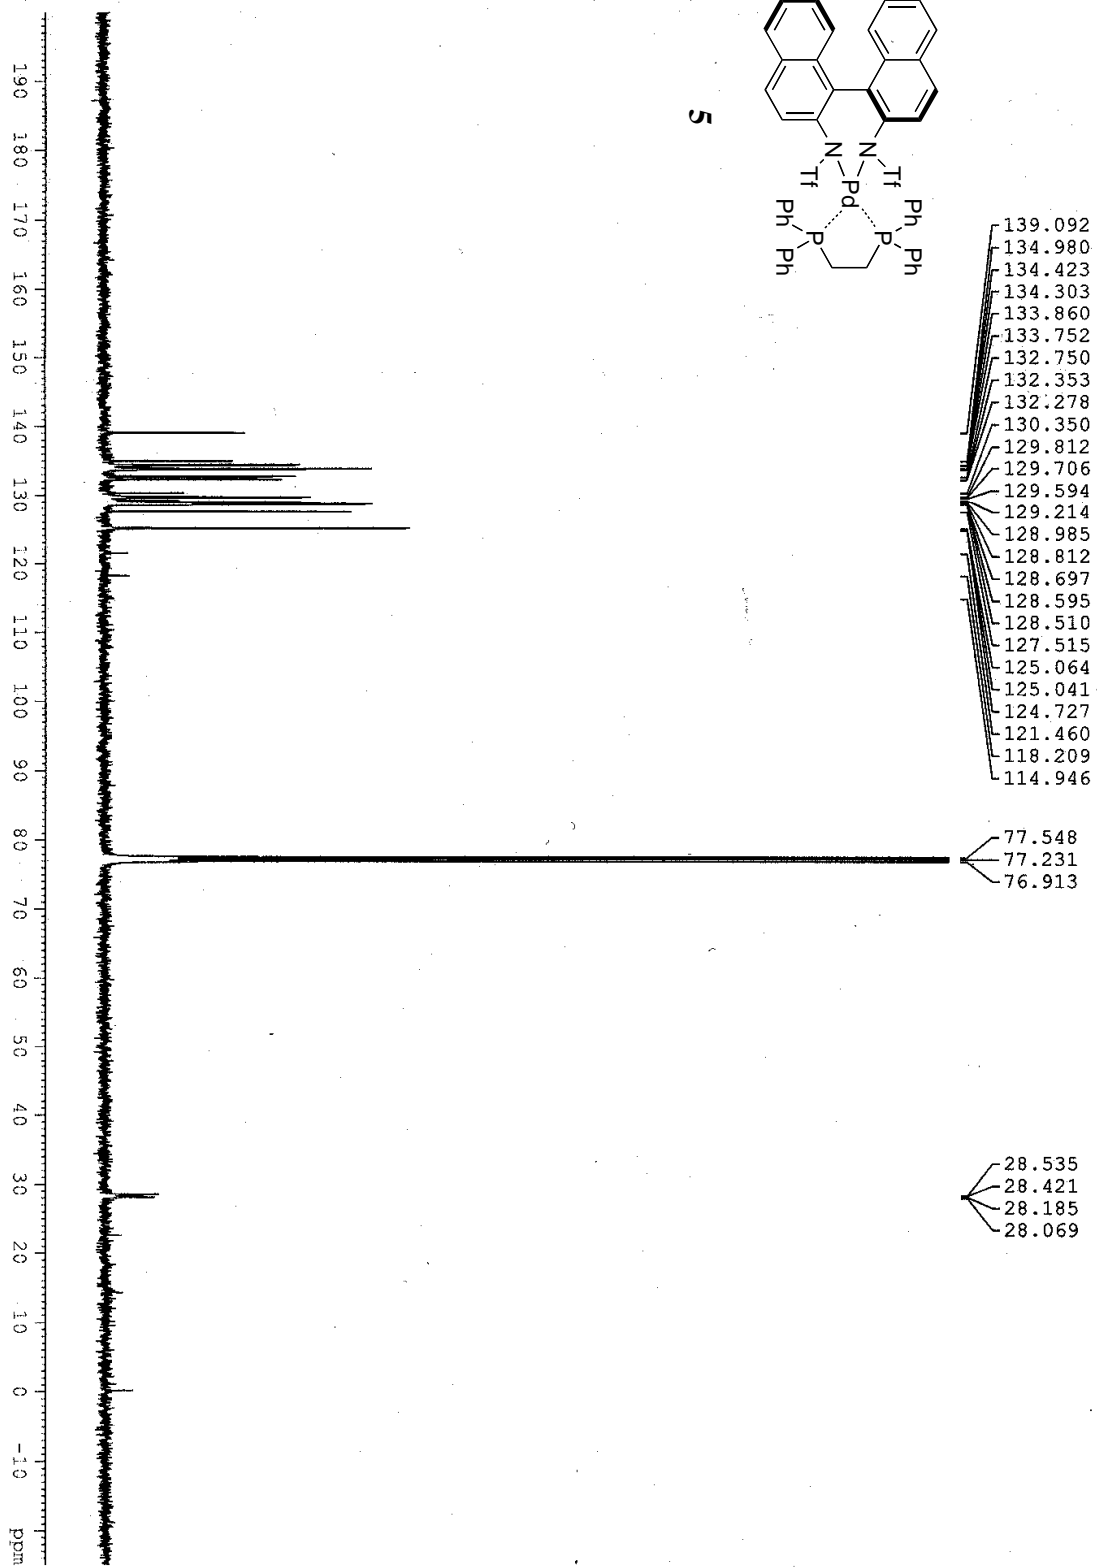

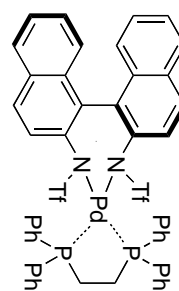

5

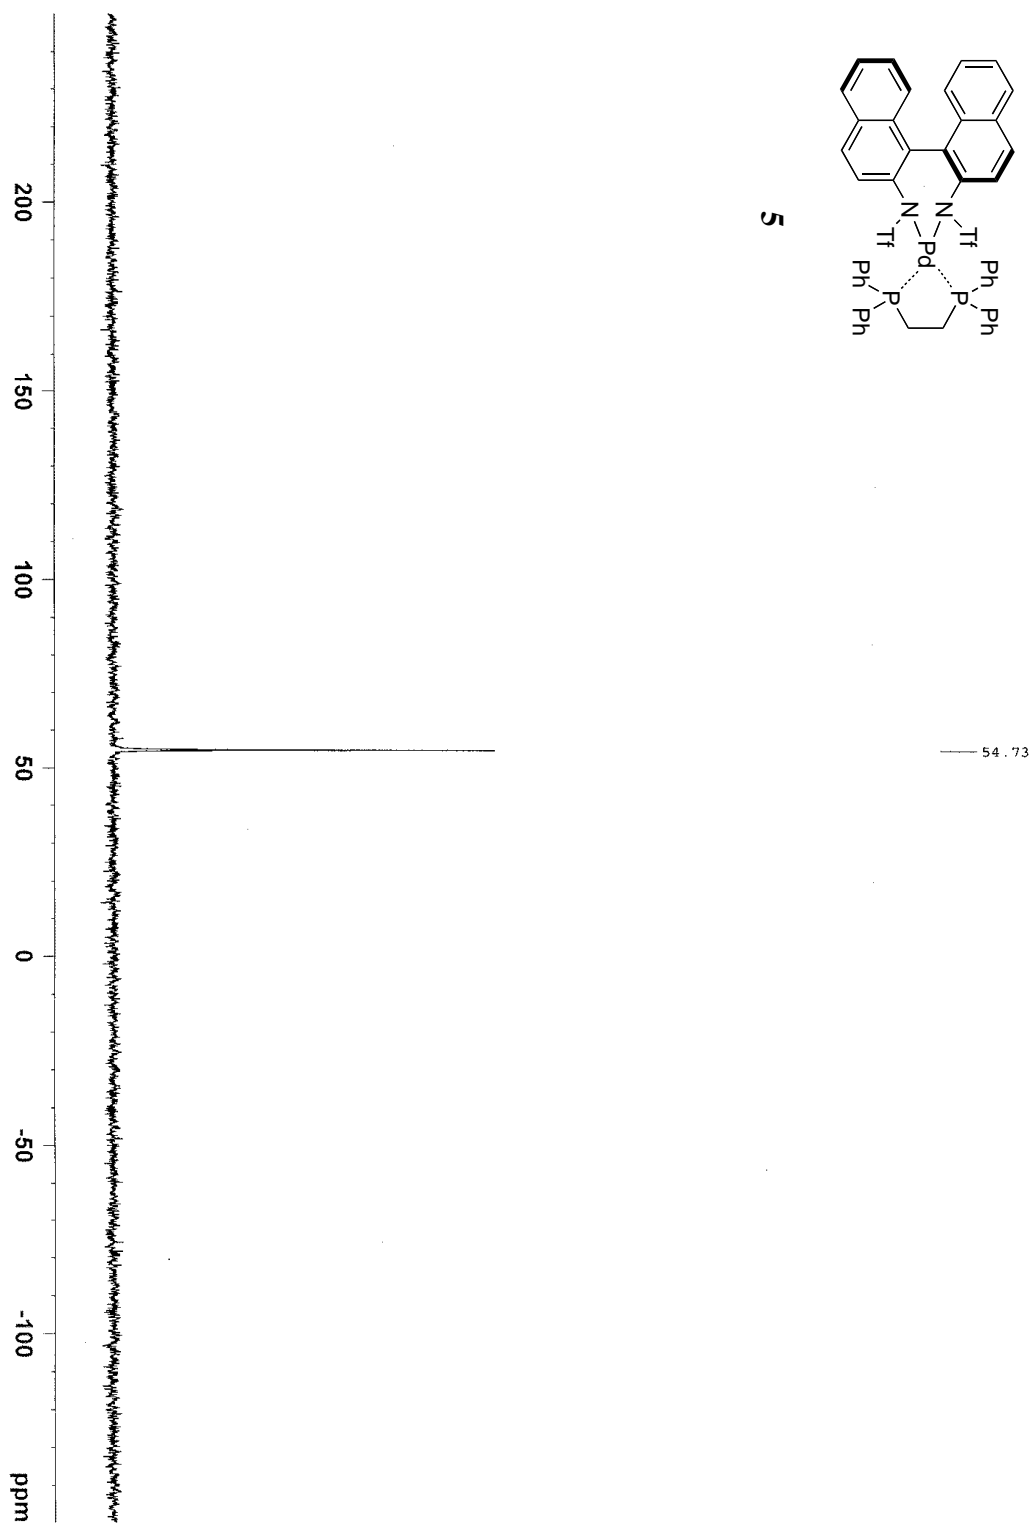



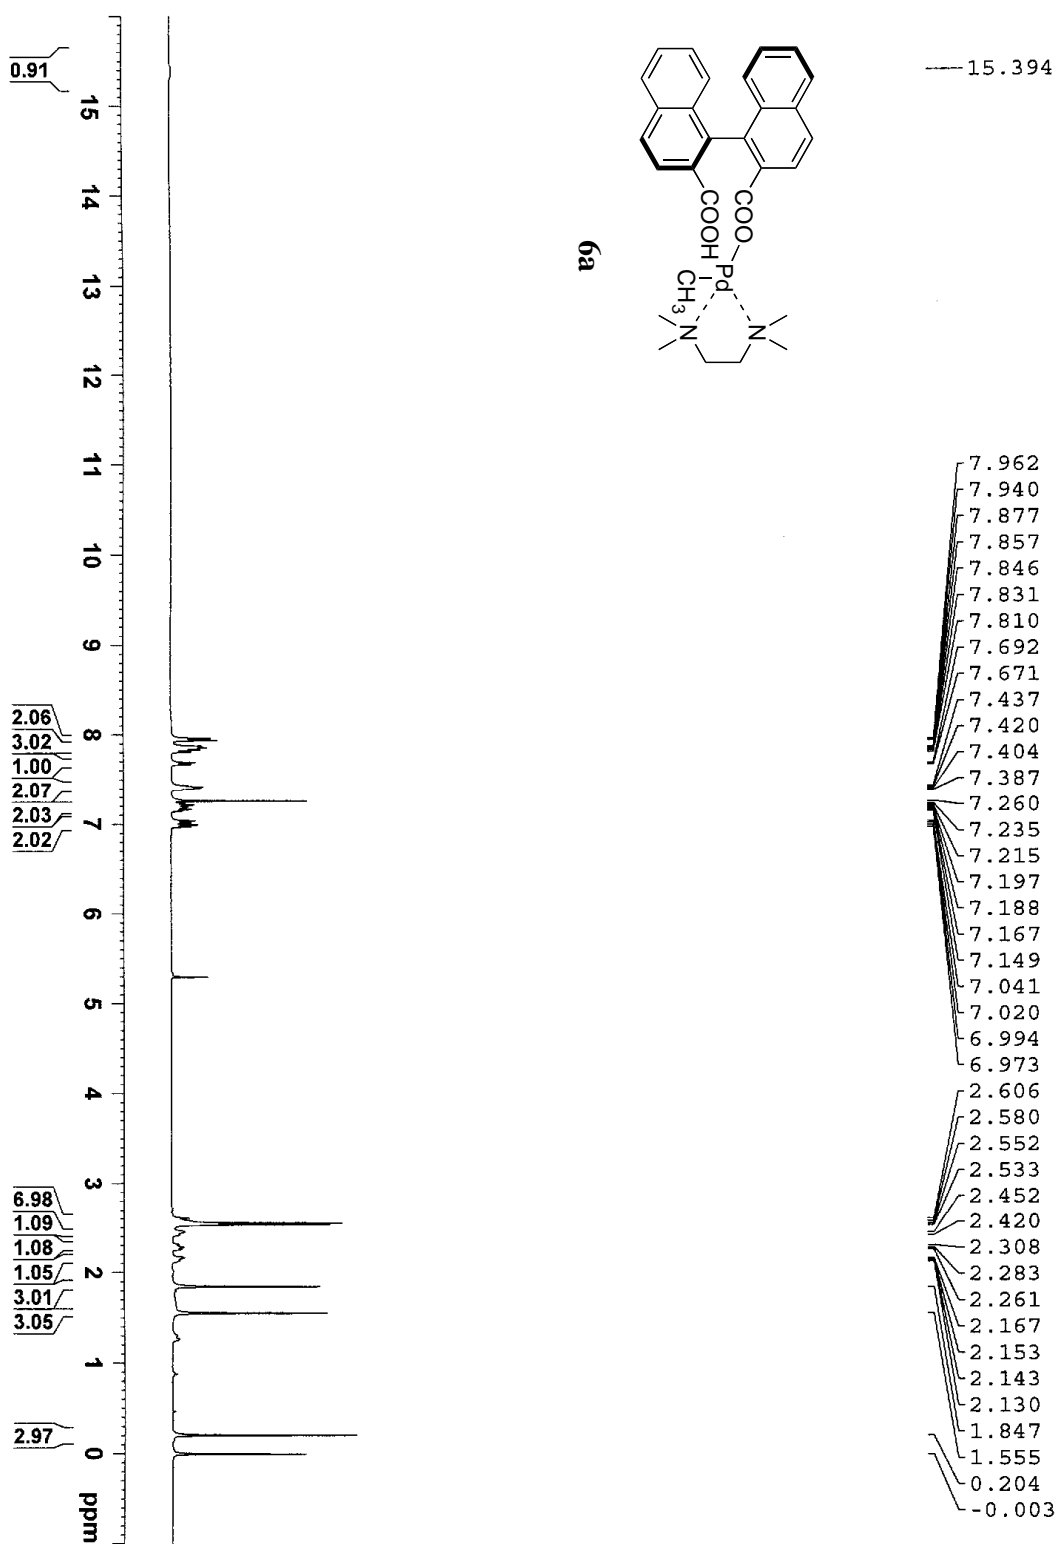

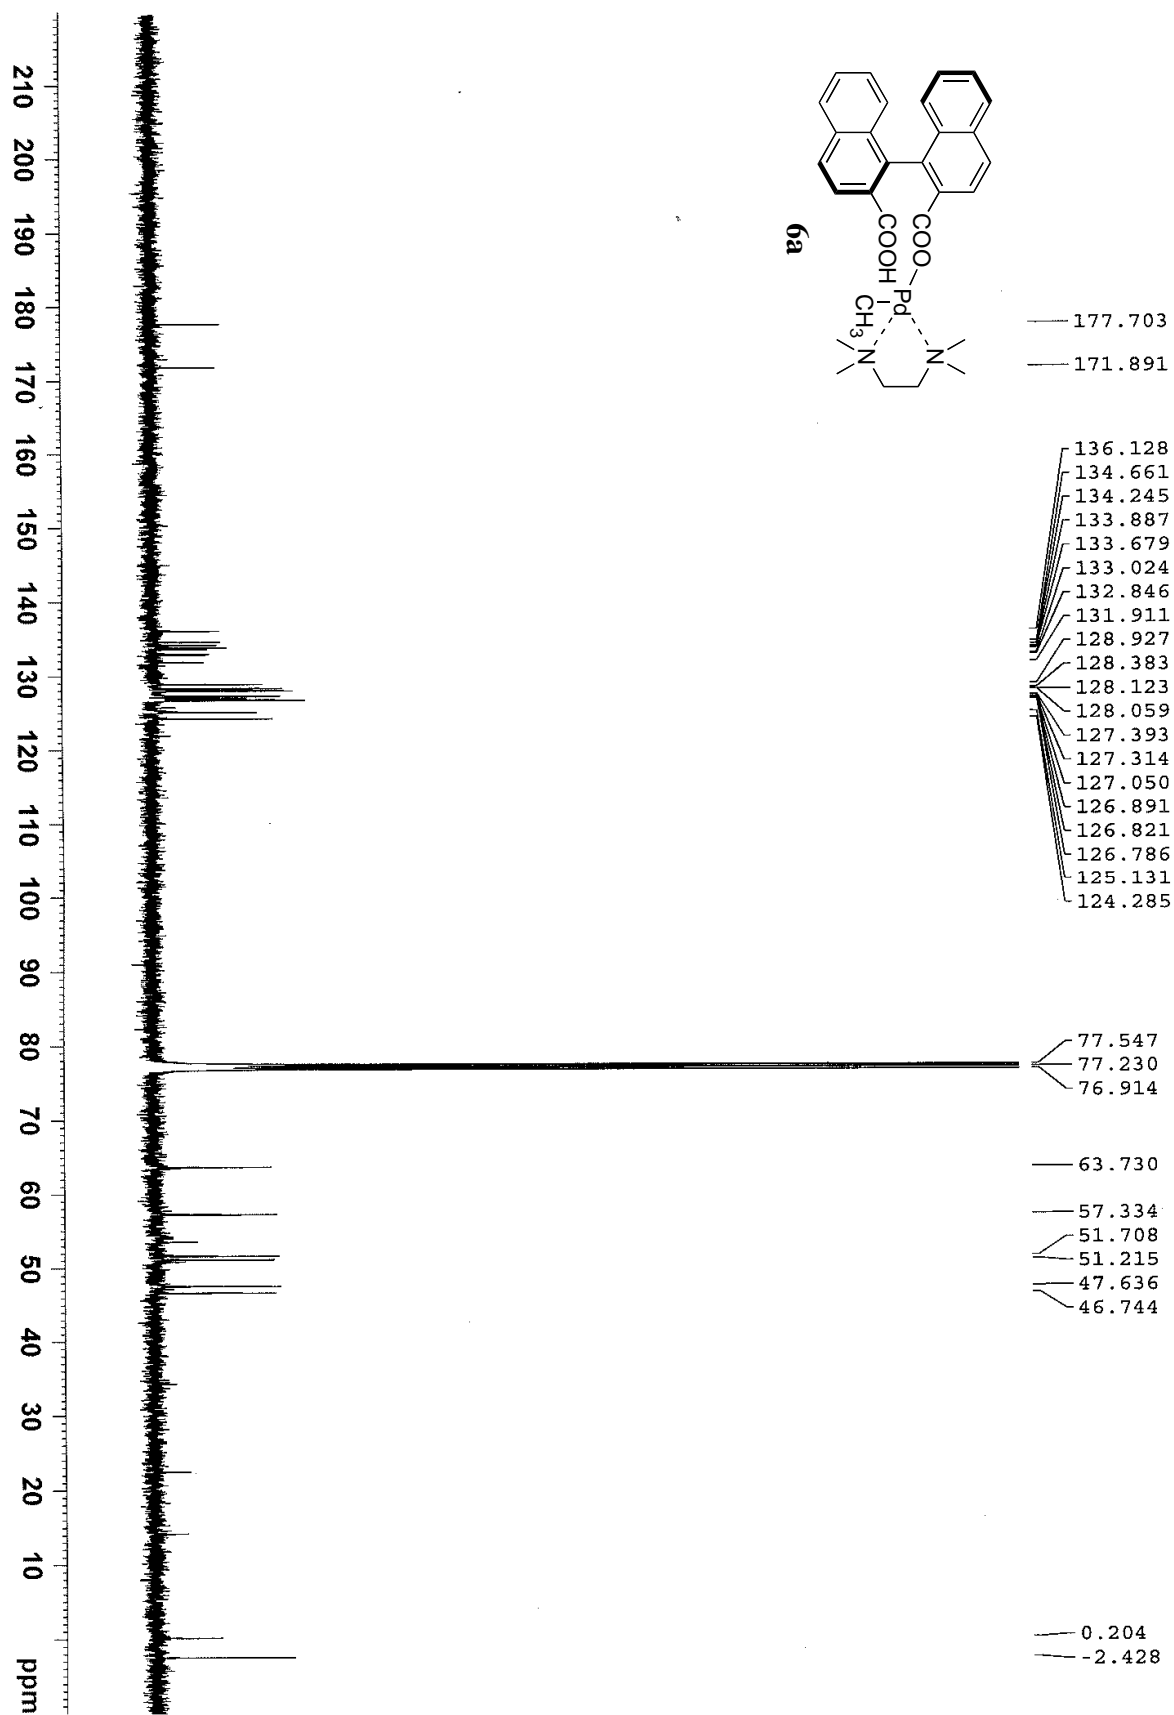

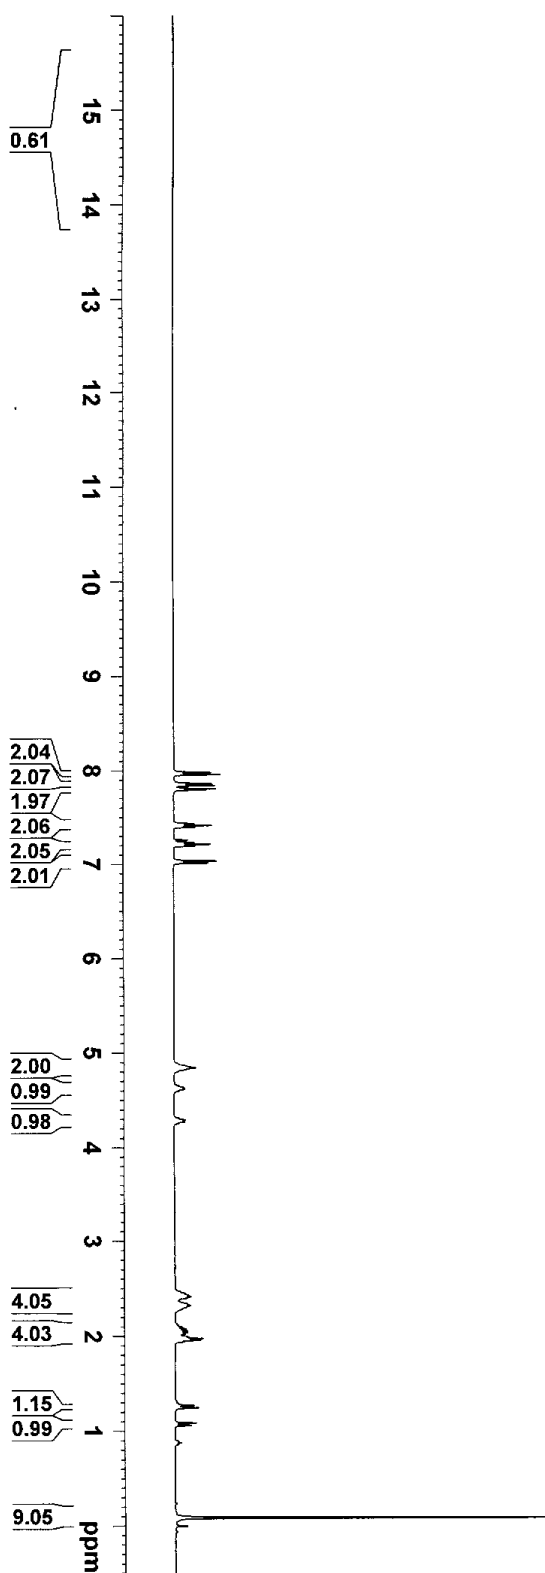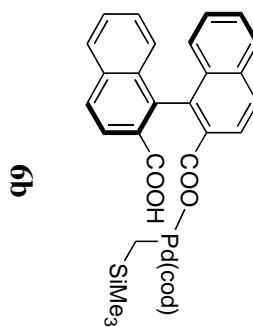

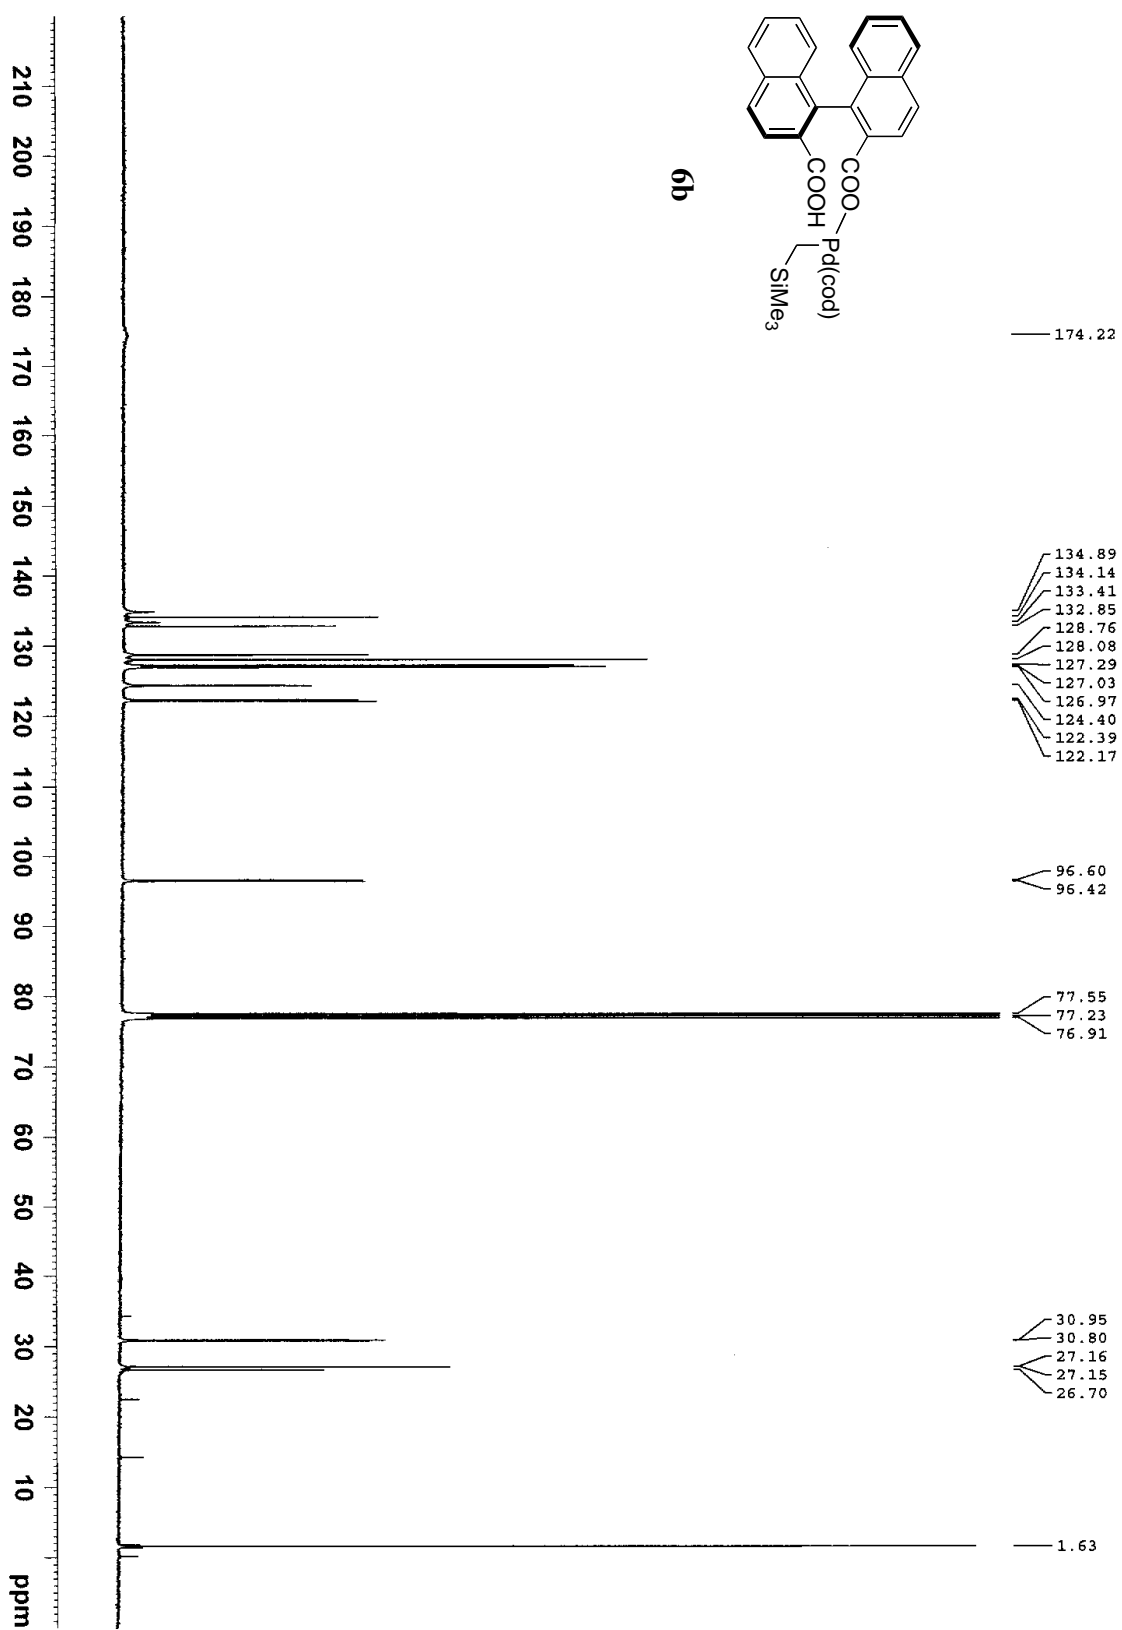

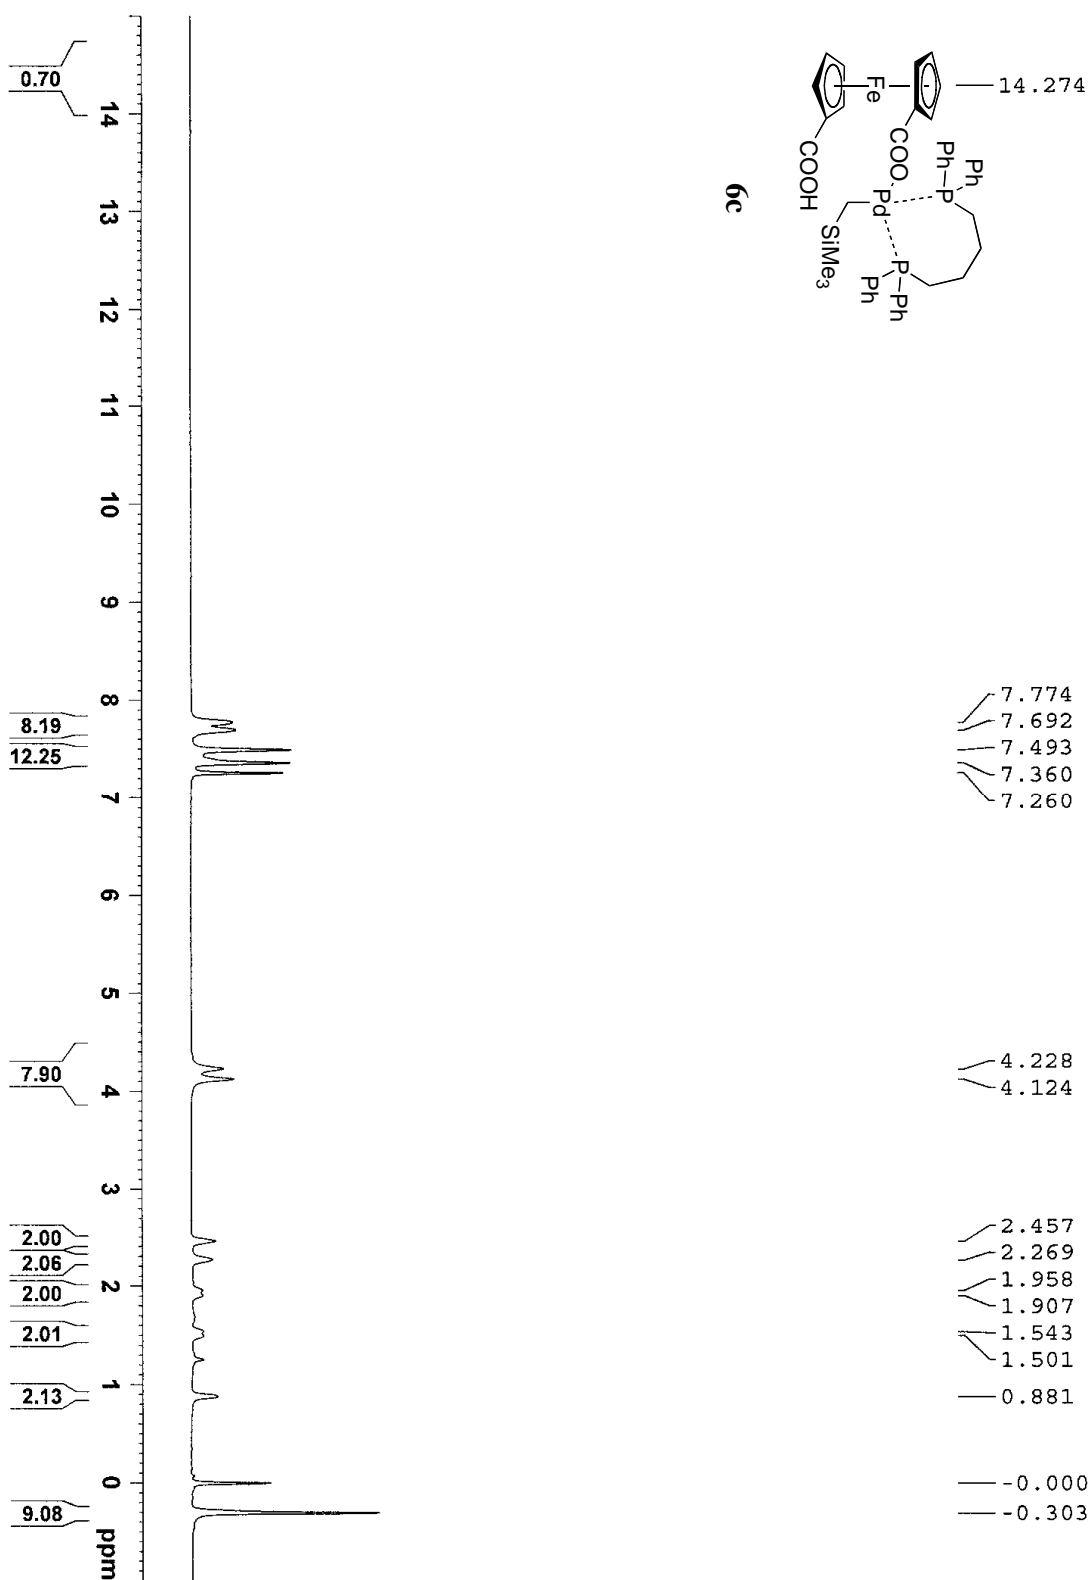

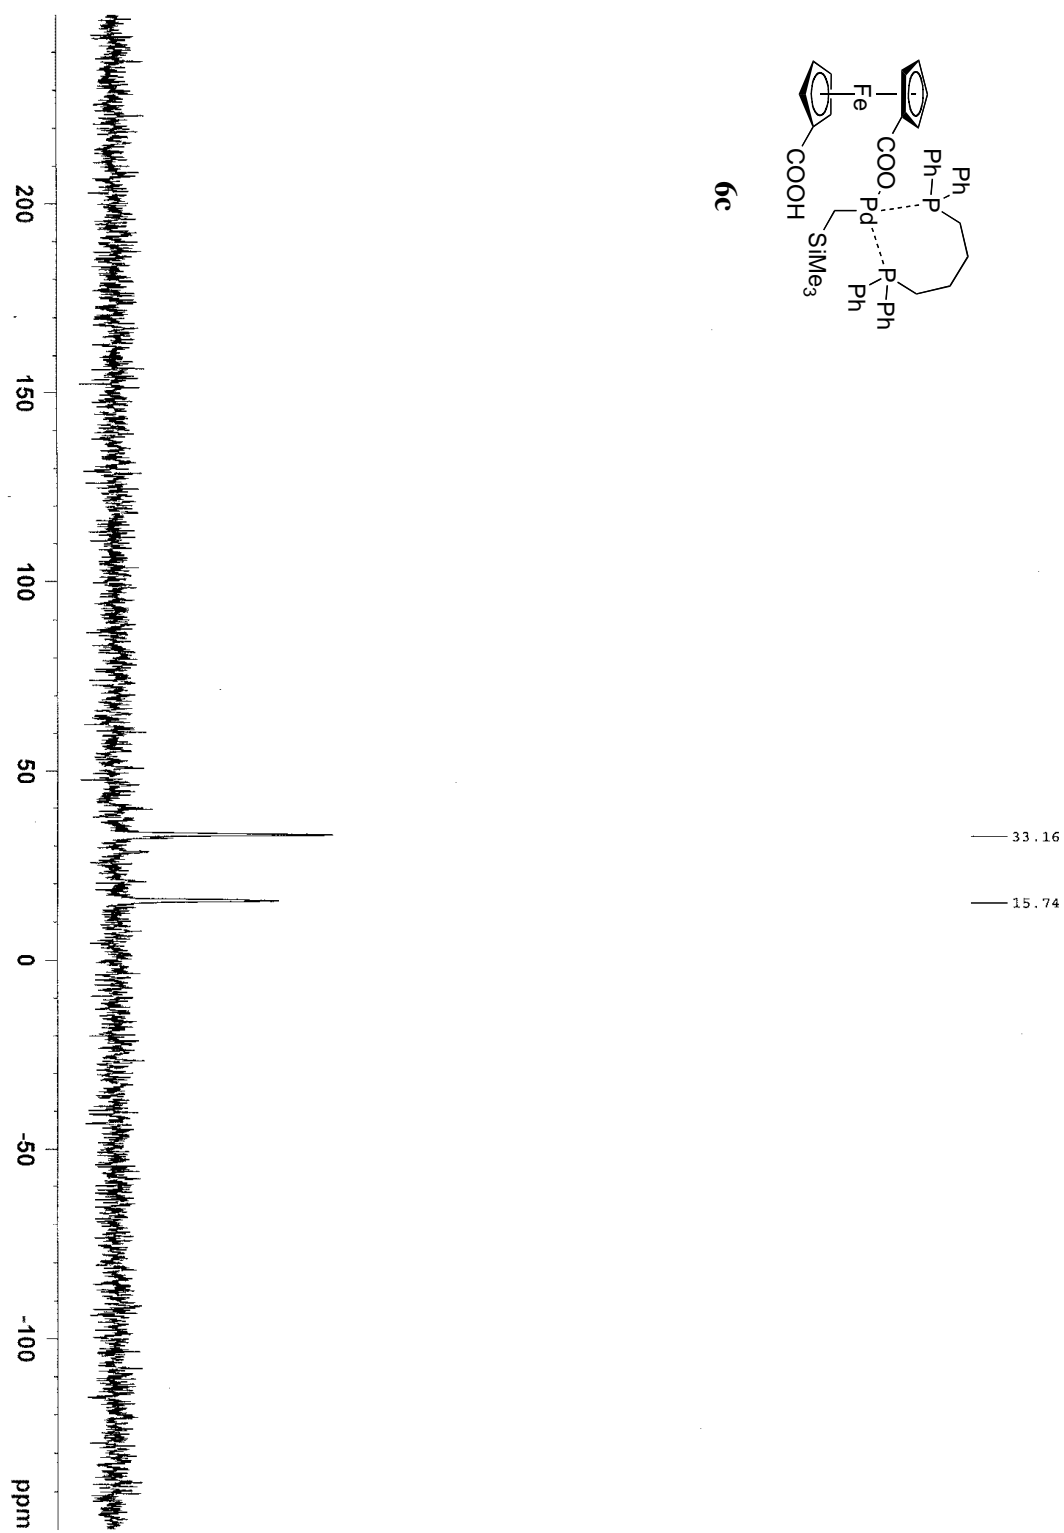

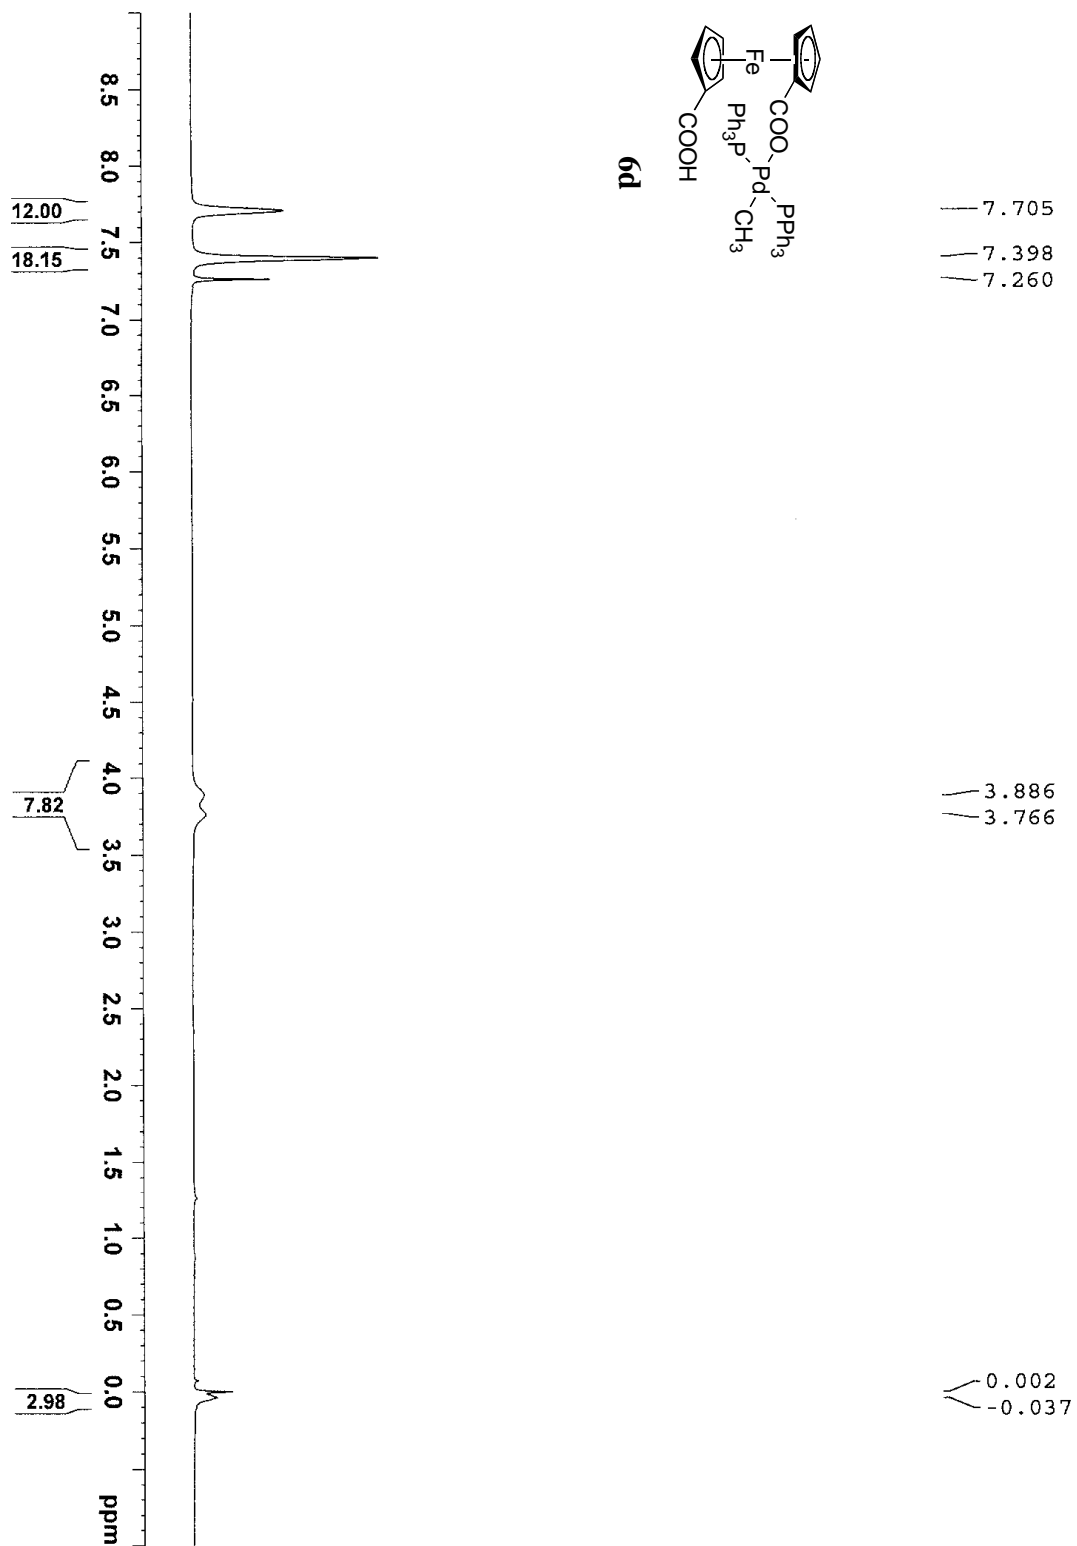

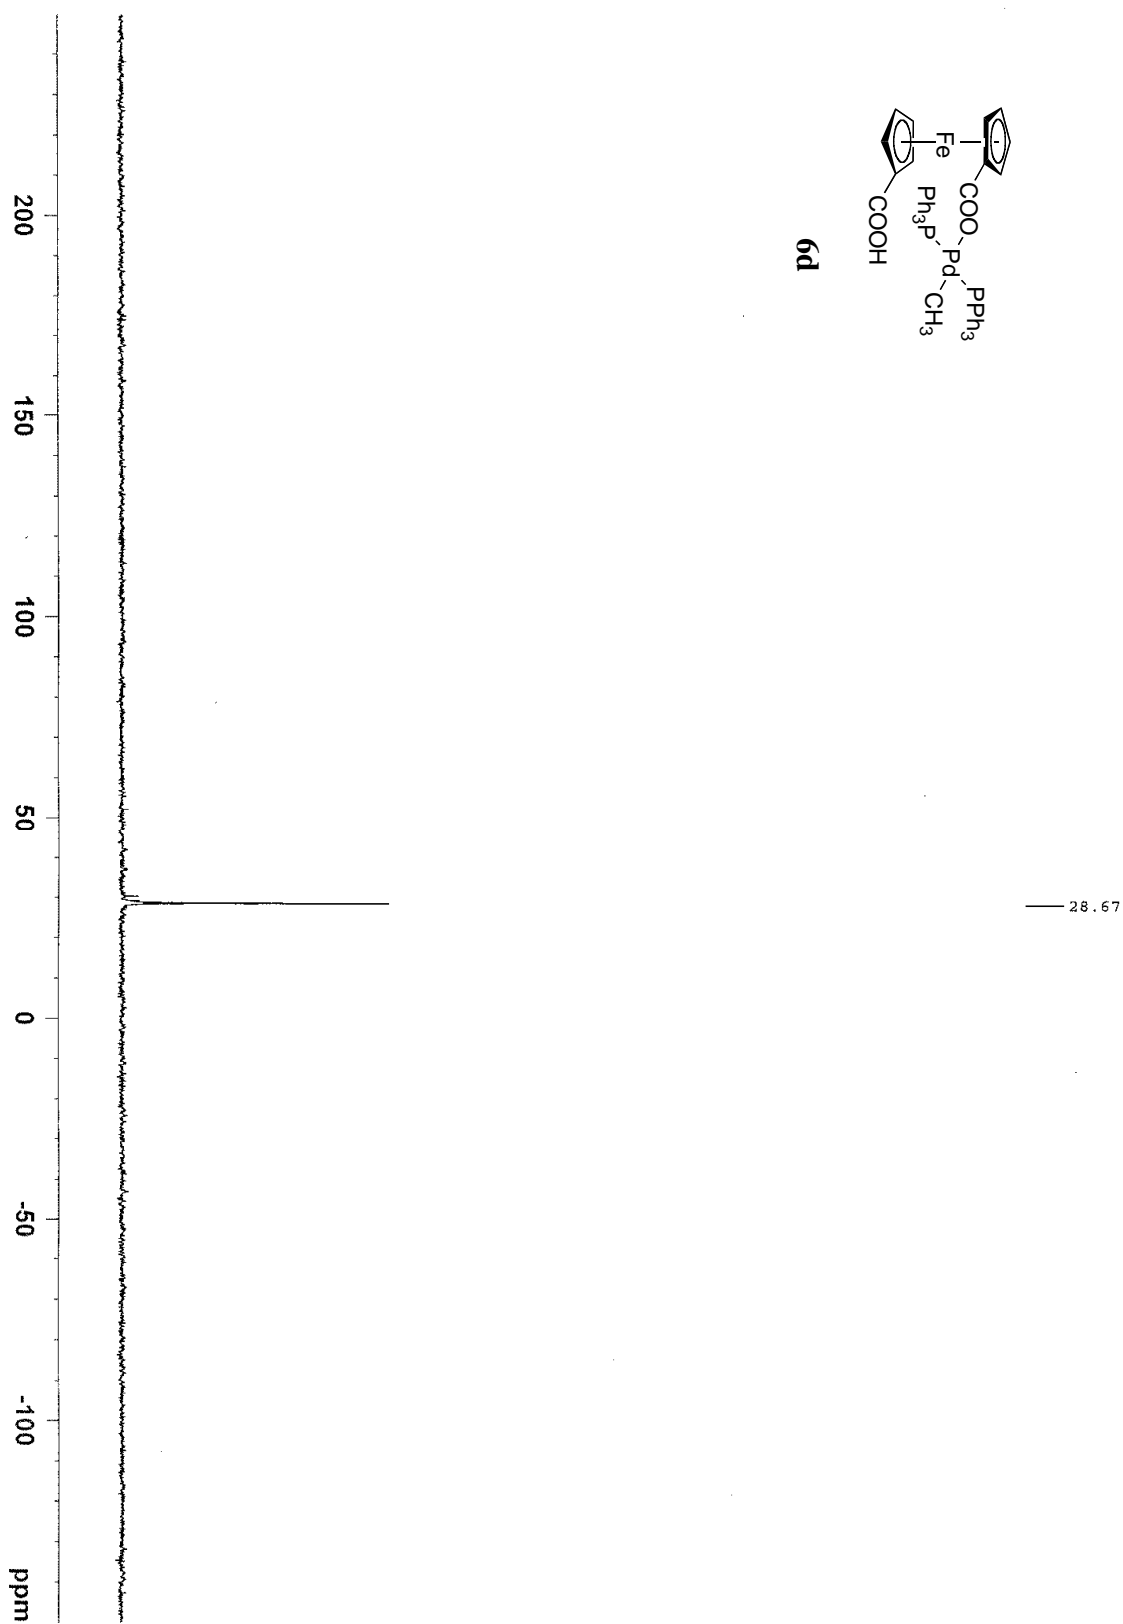



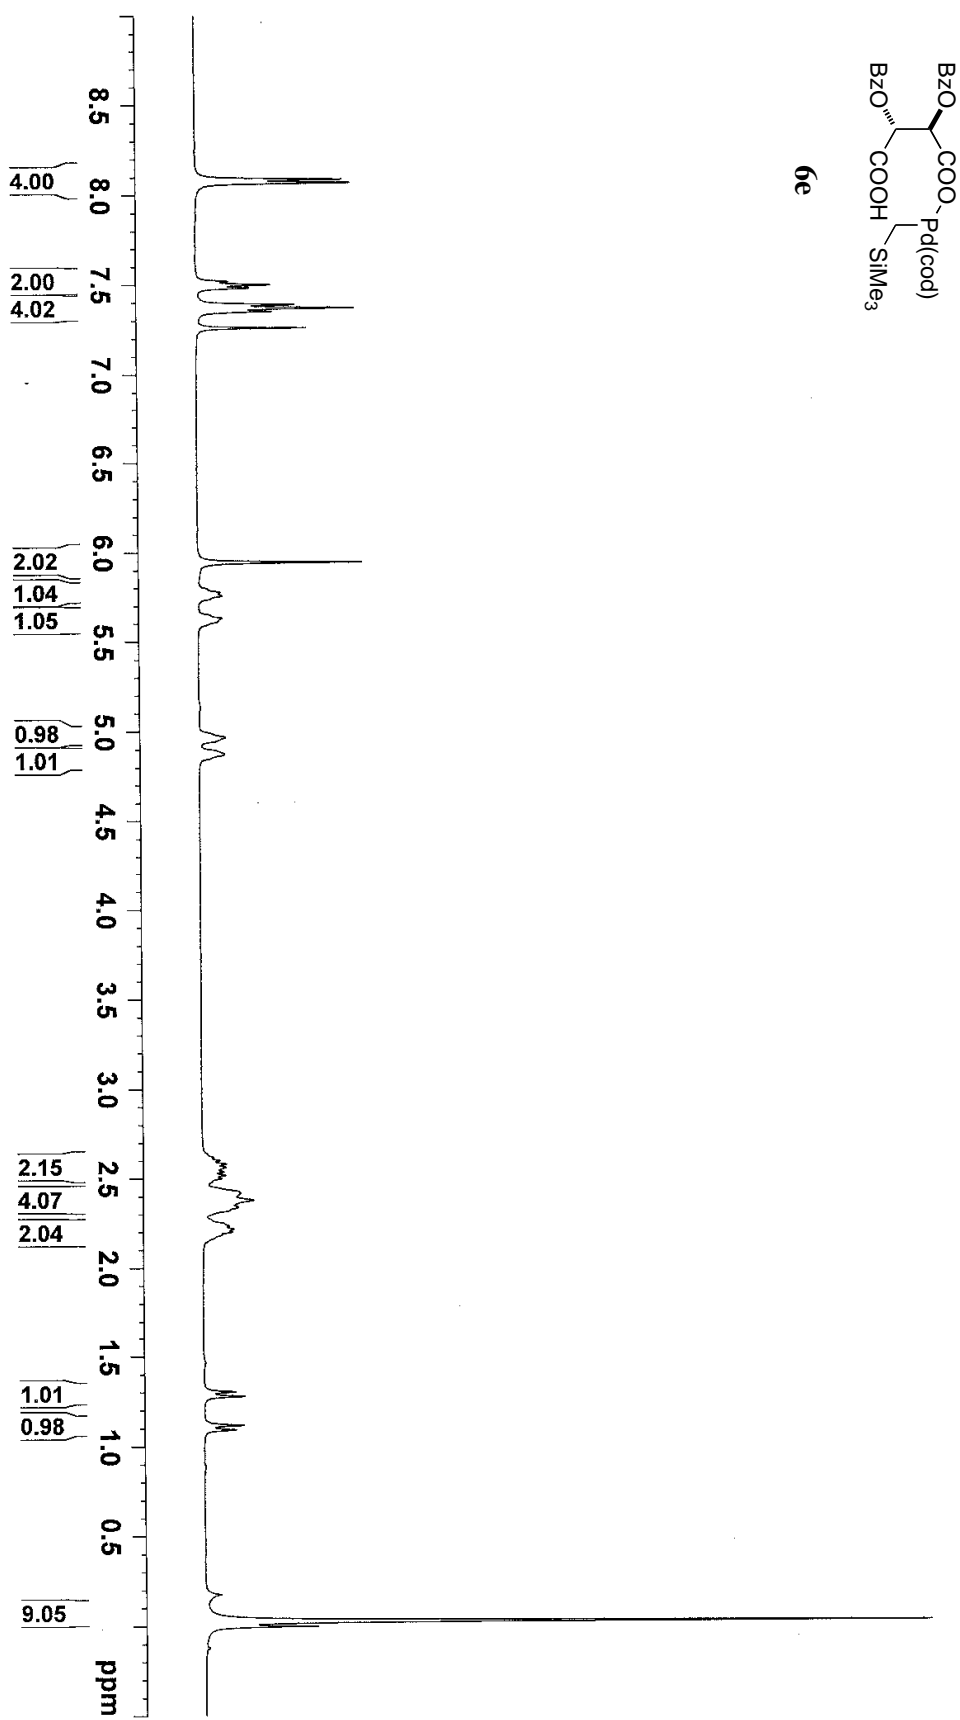

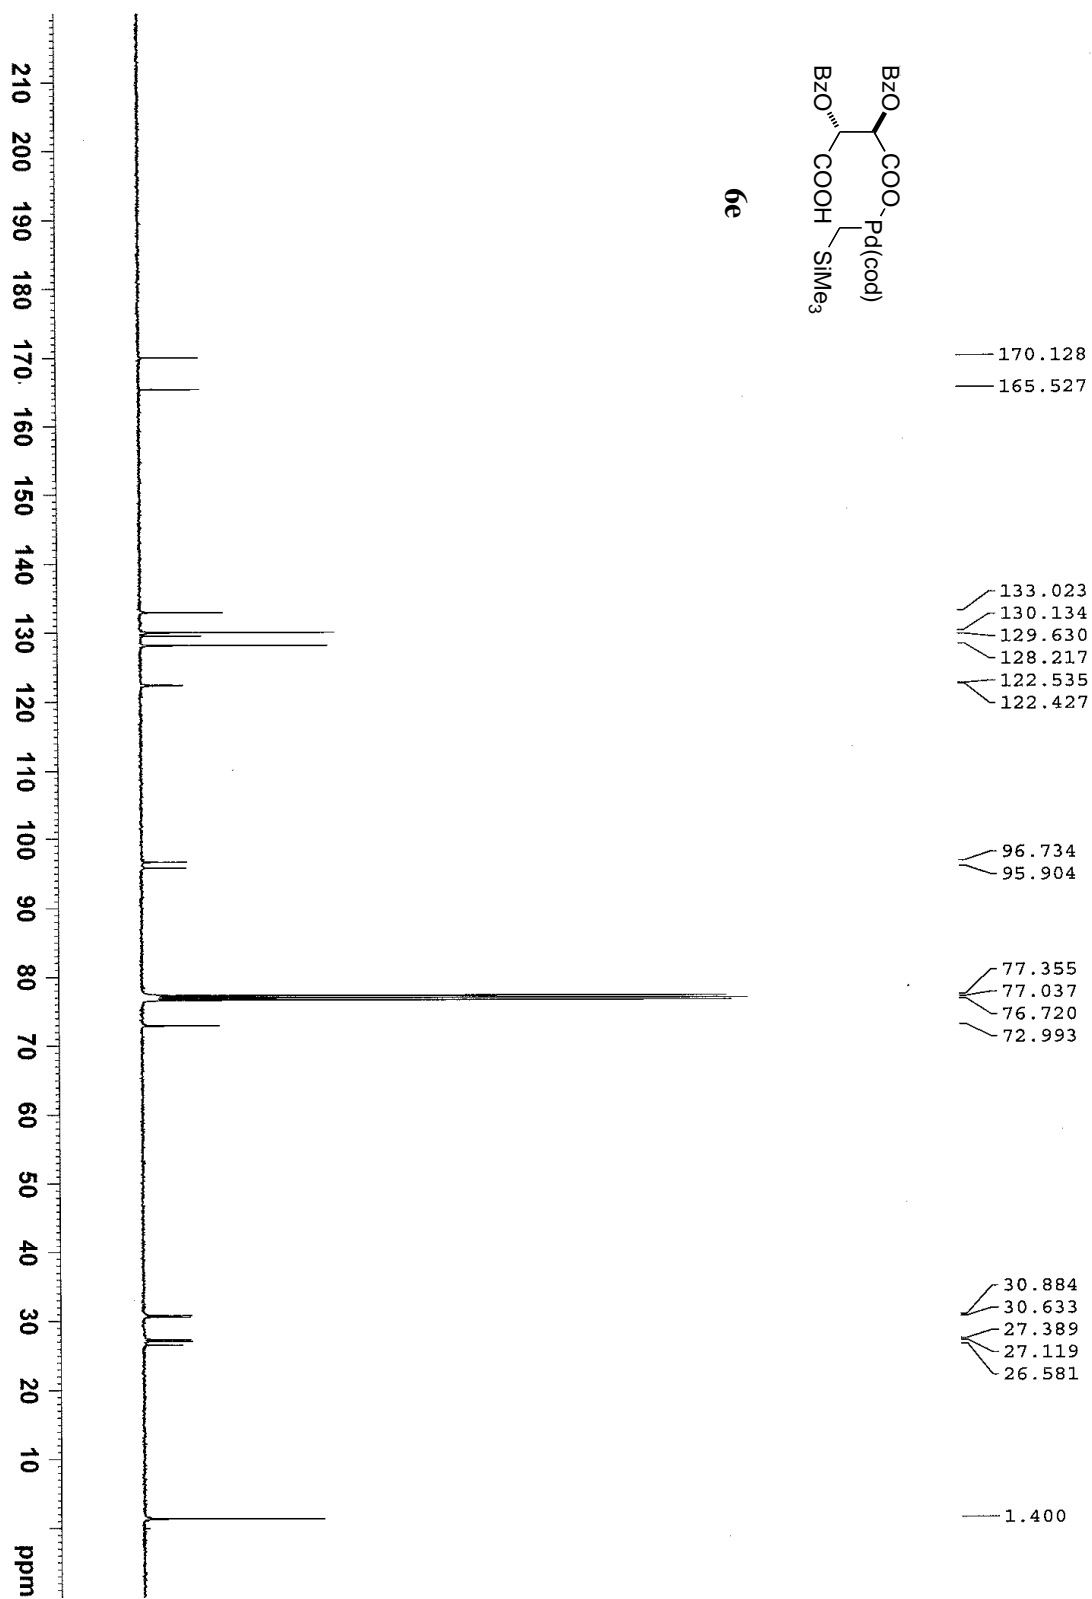

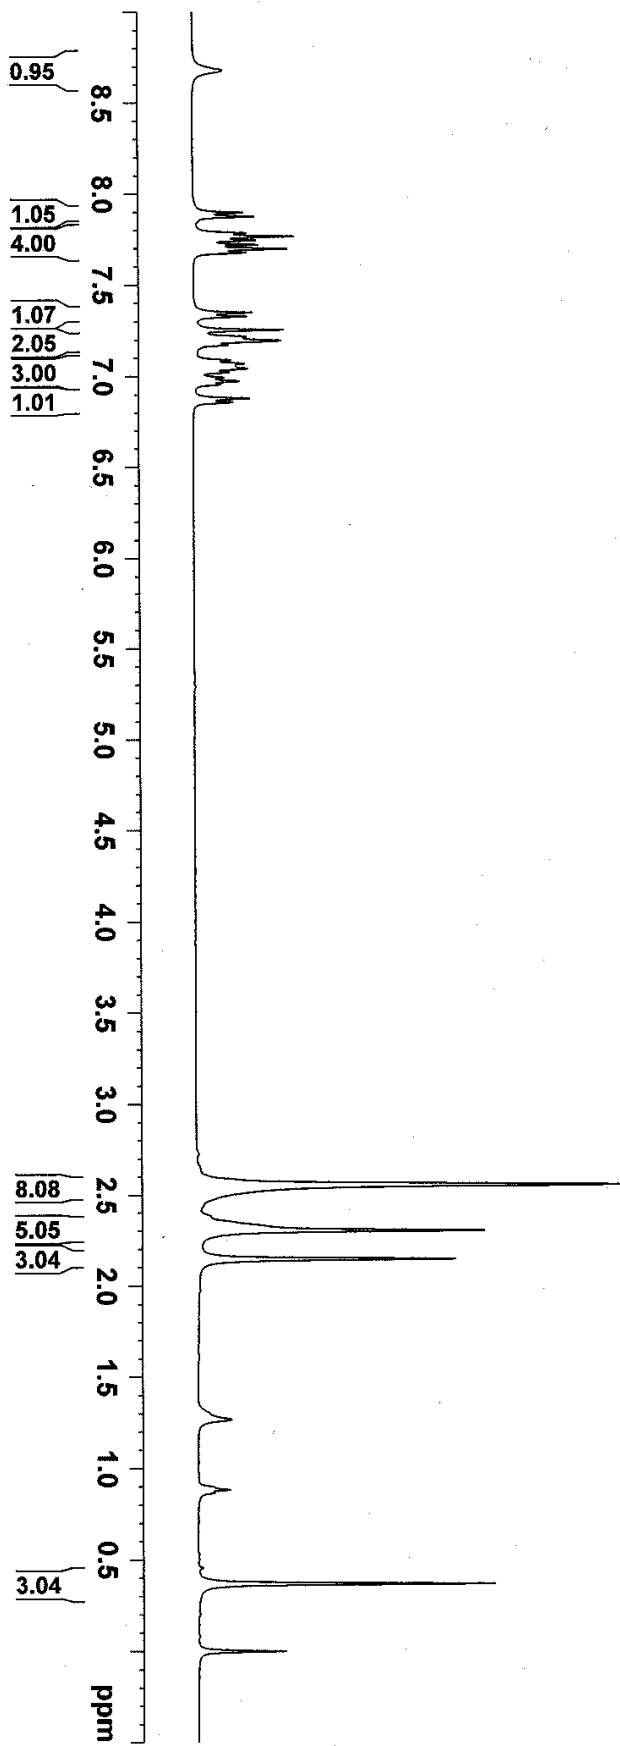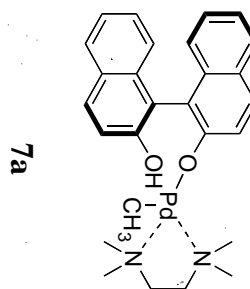

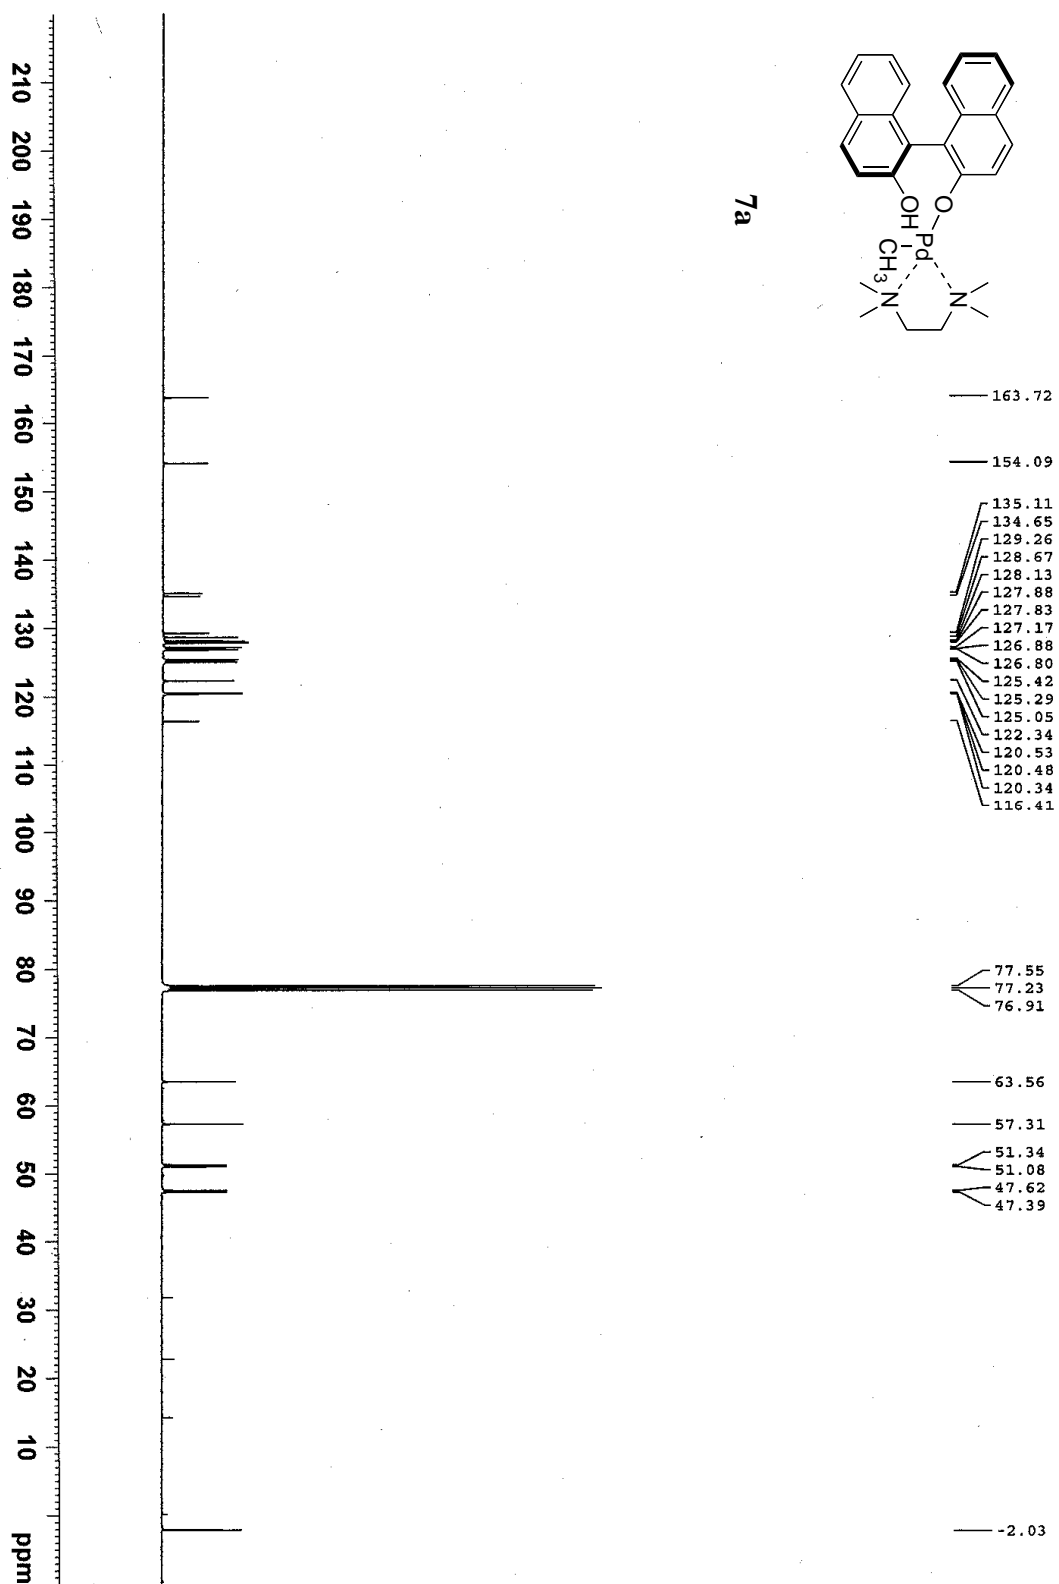

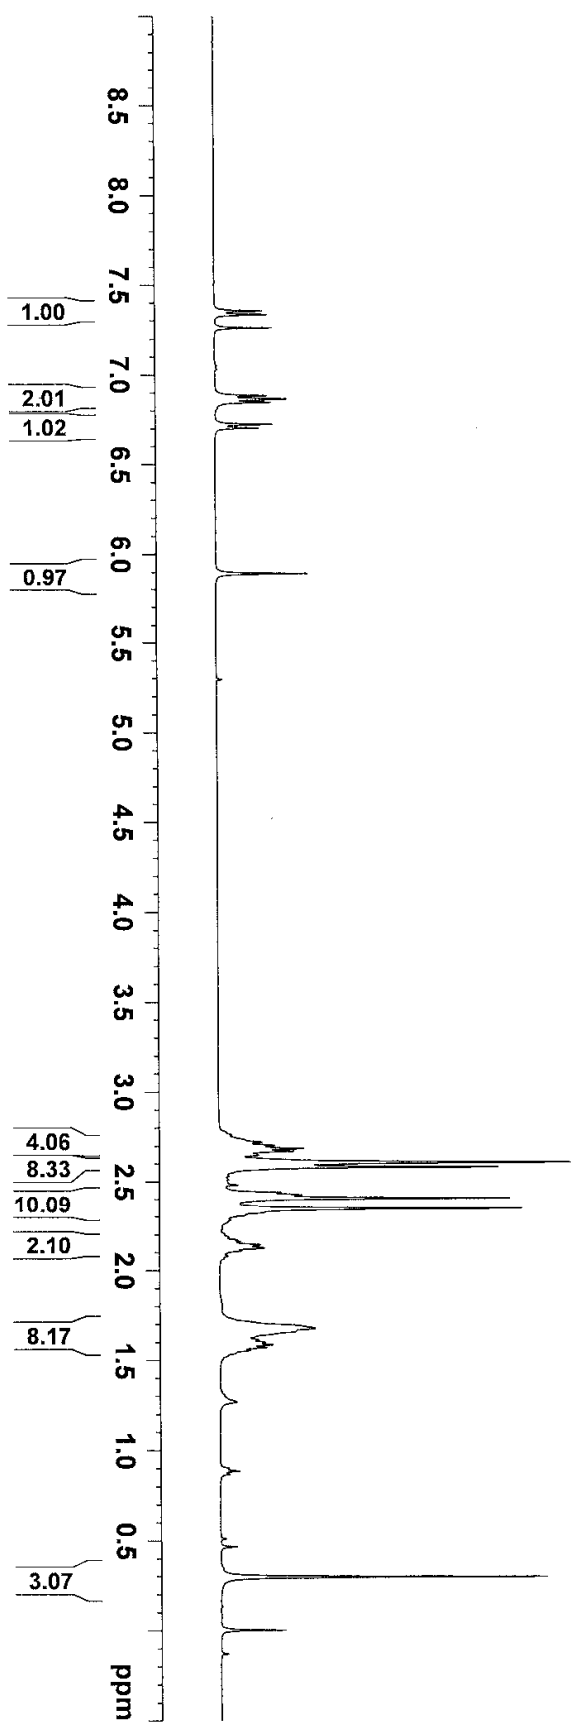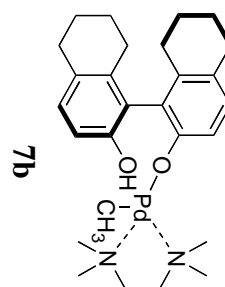

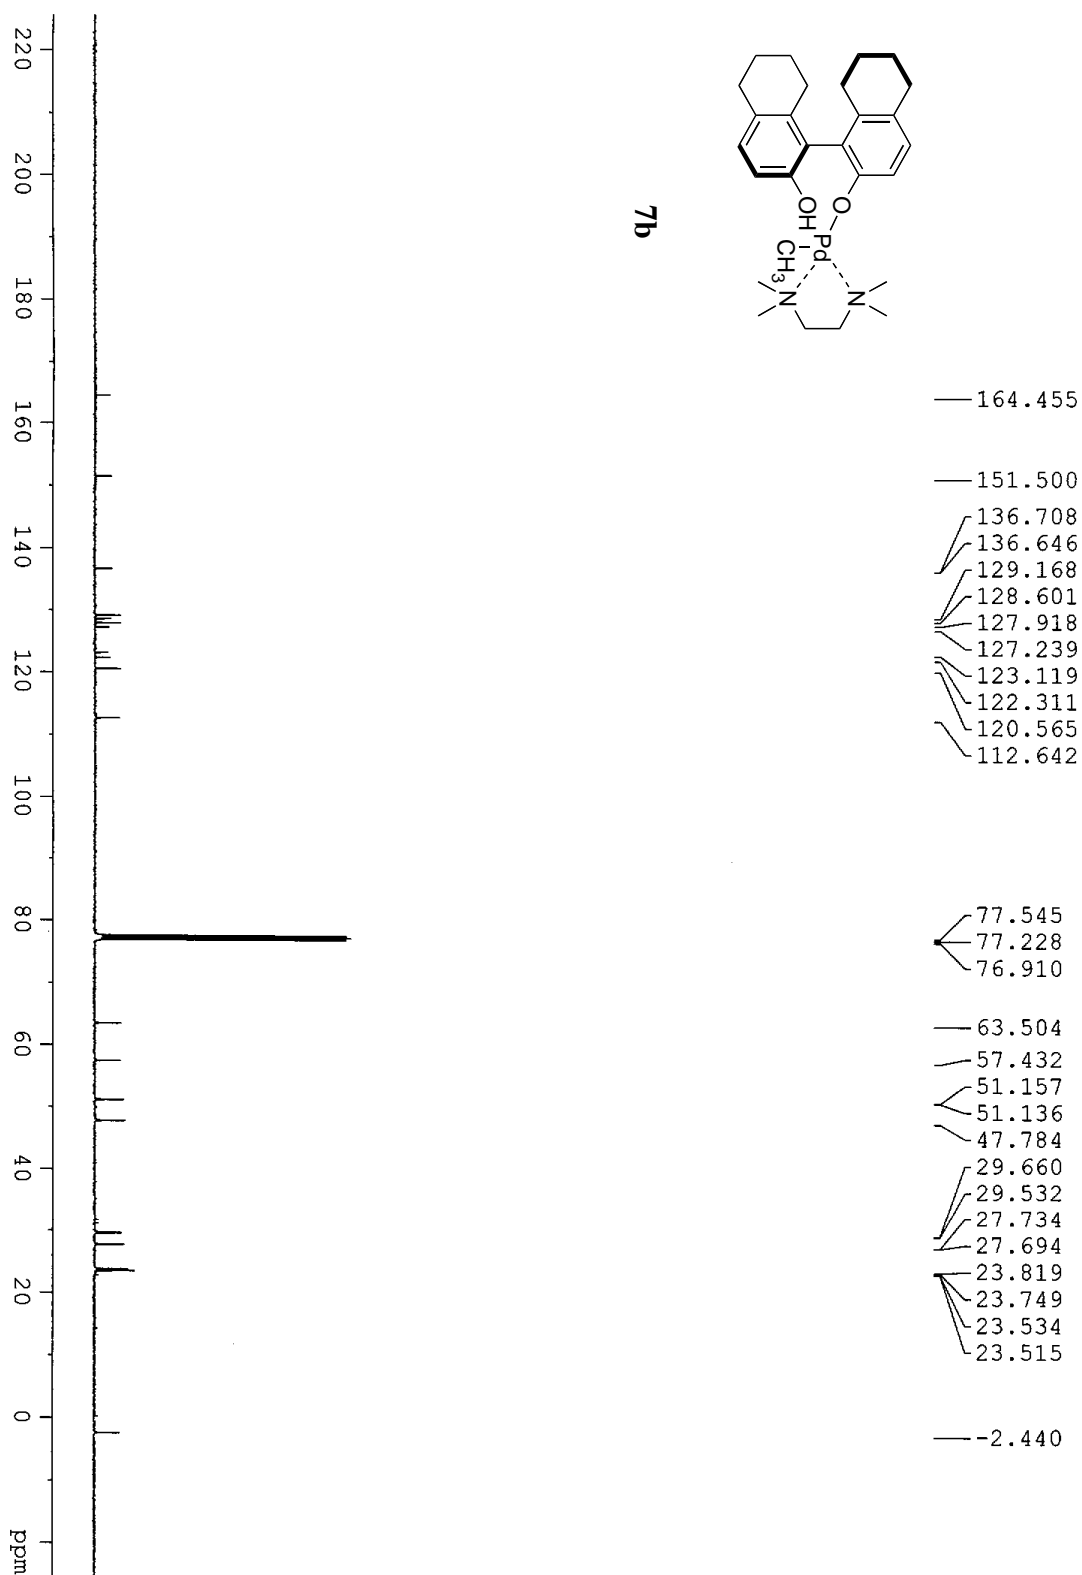

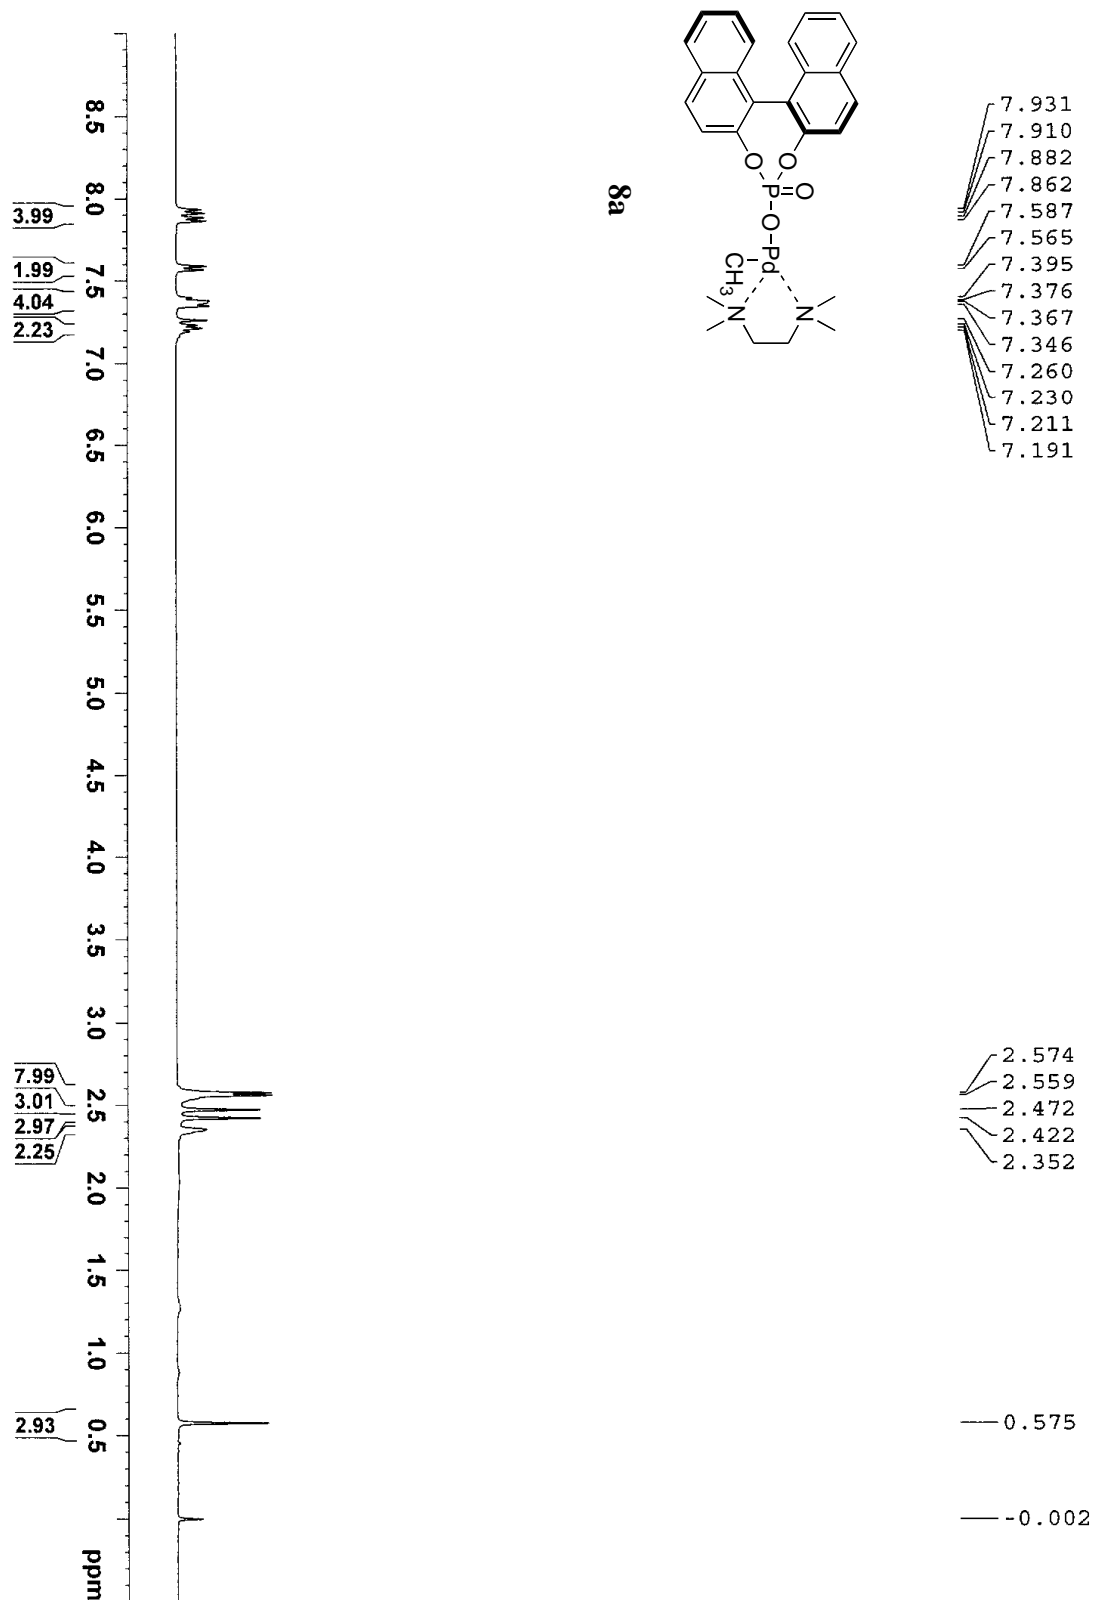

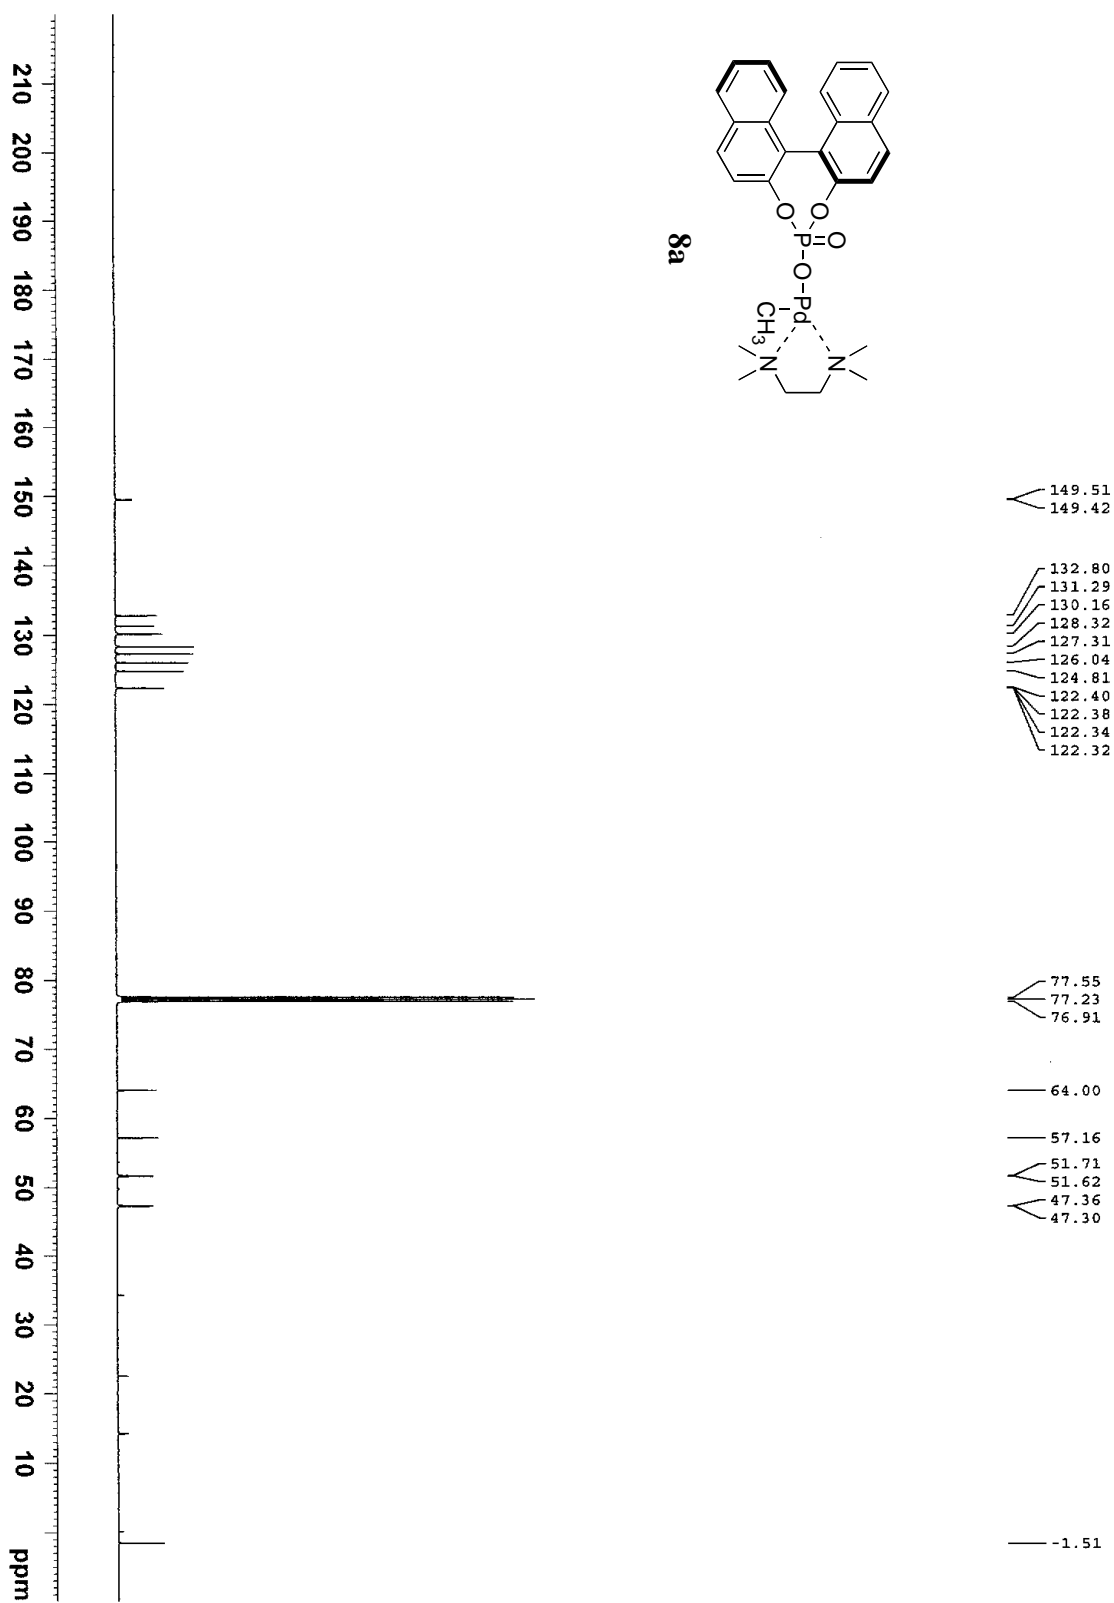



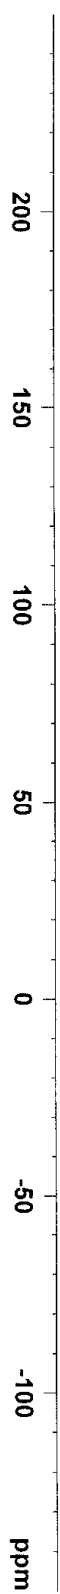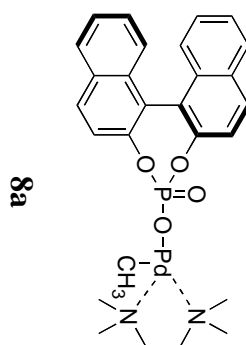

— 9.73

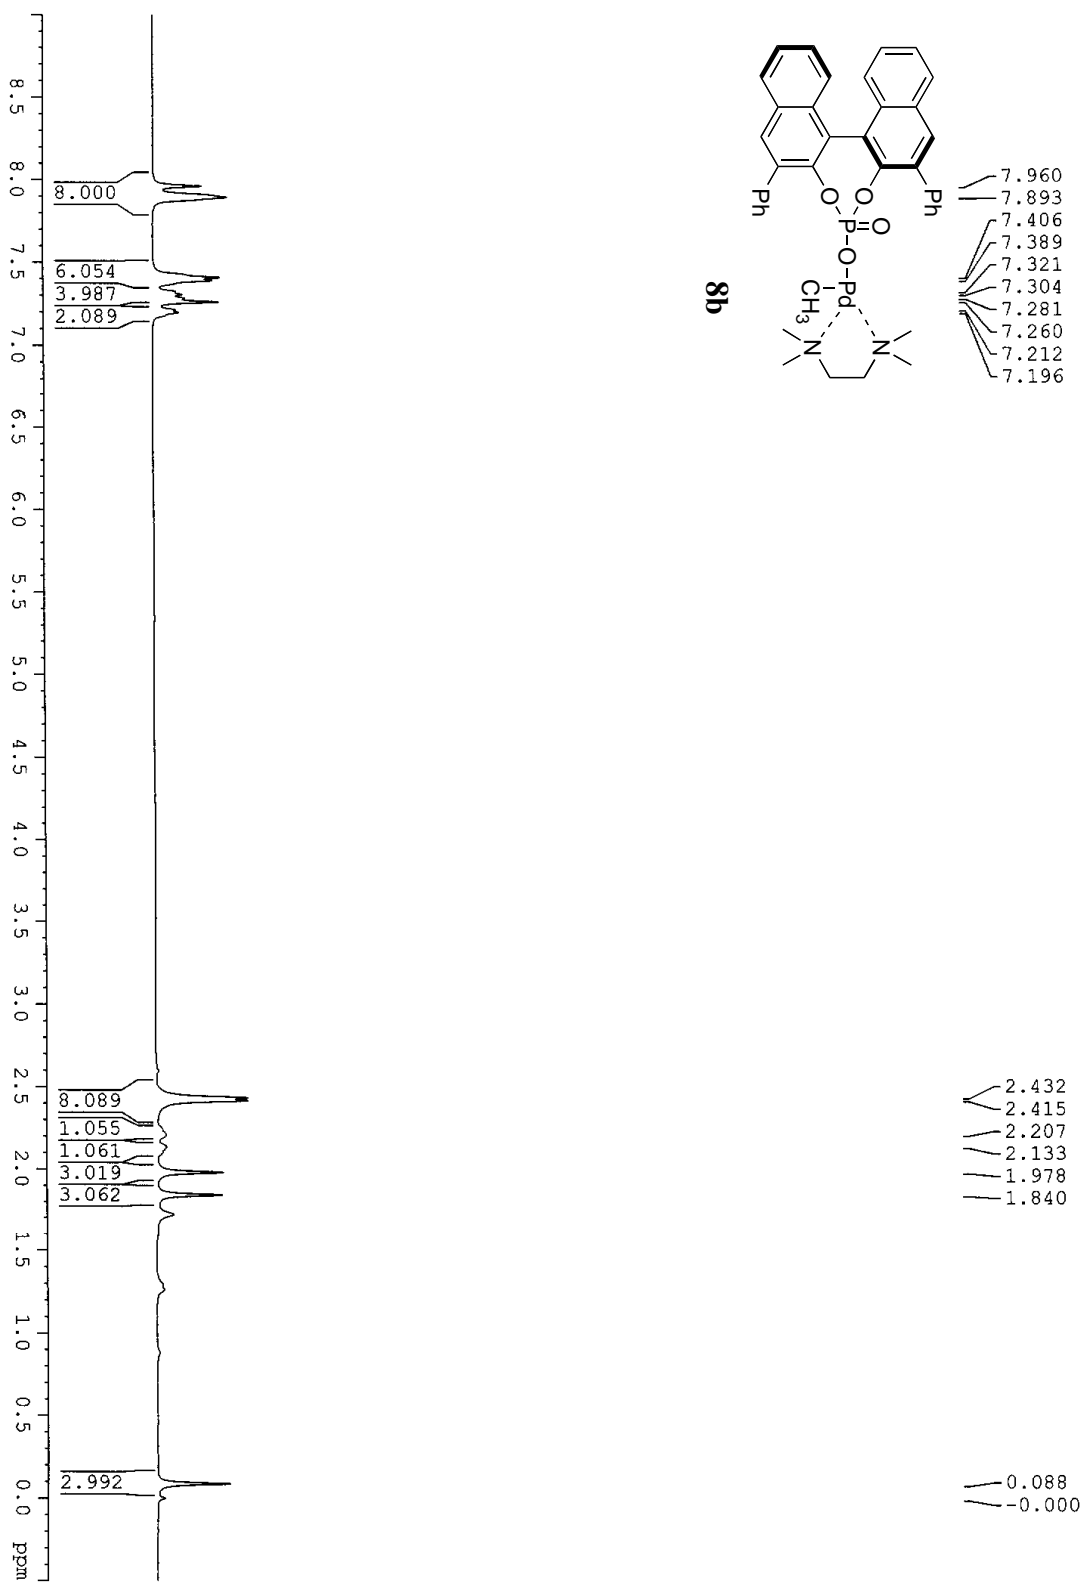

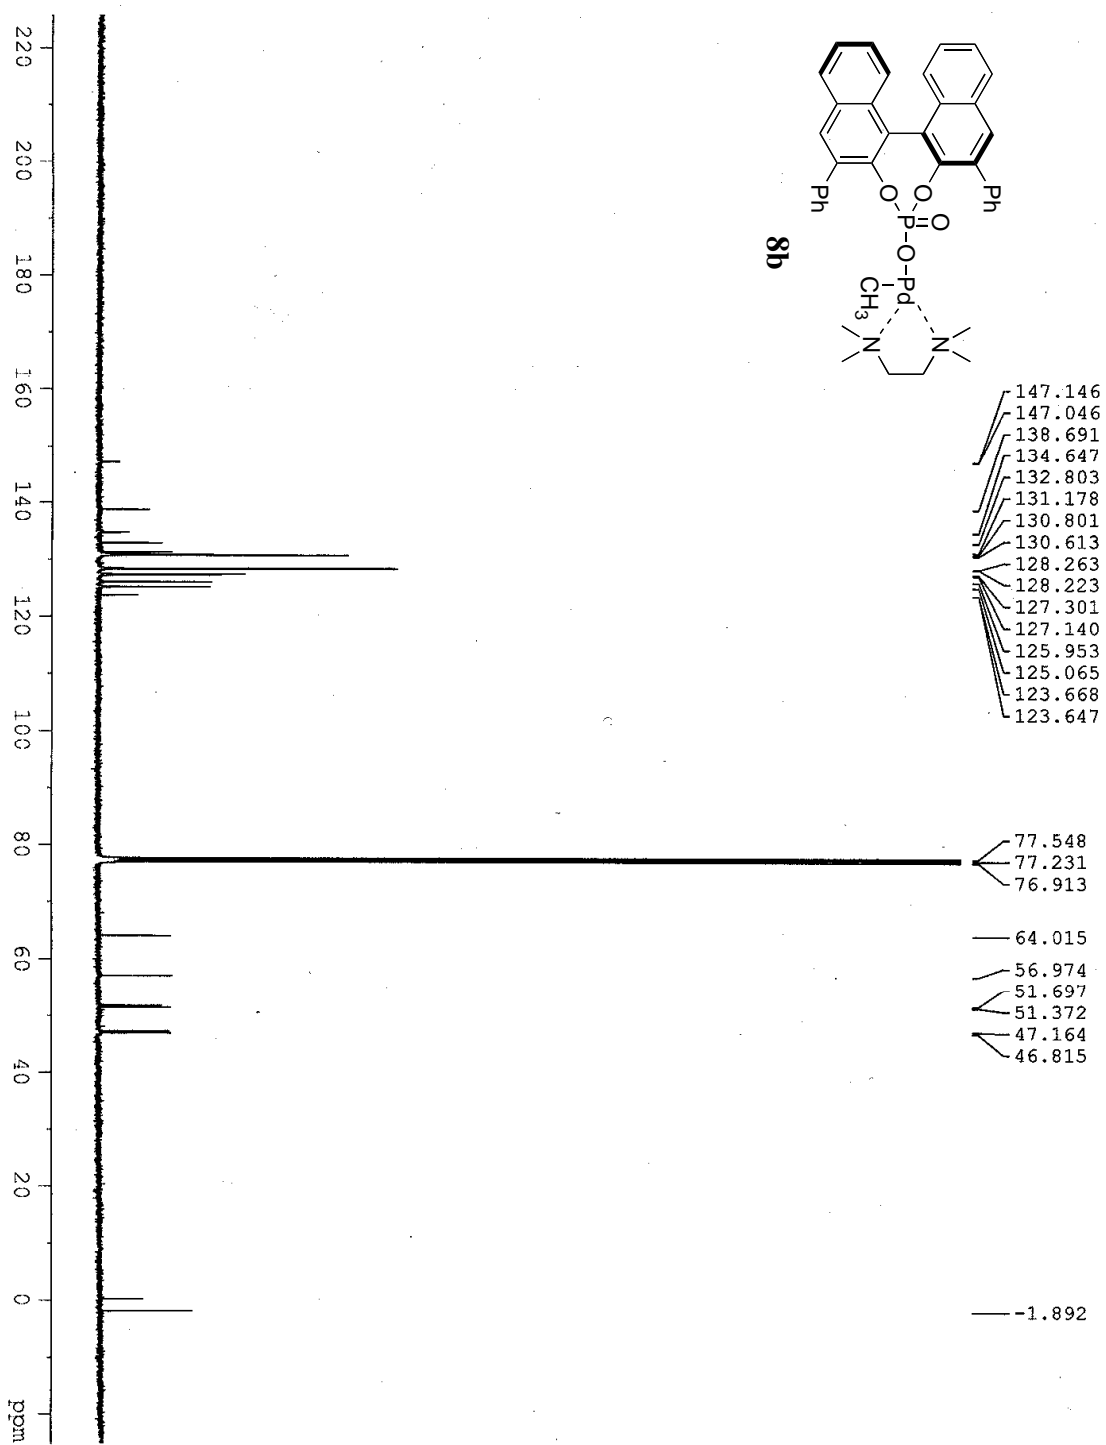

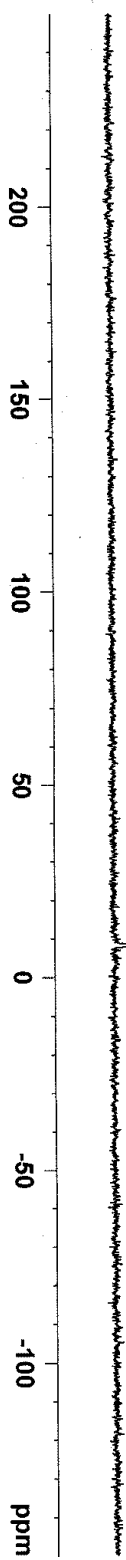

8b

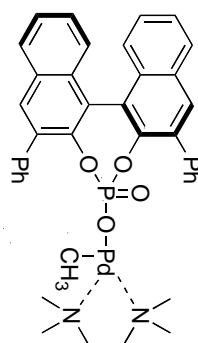

8.11

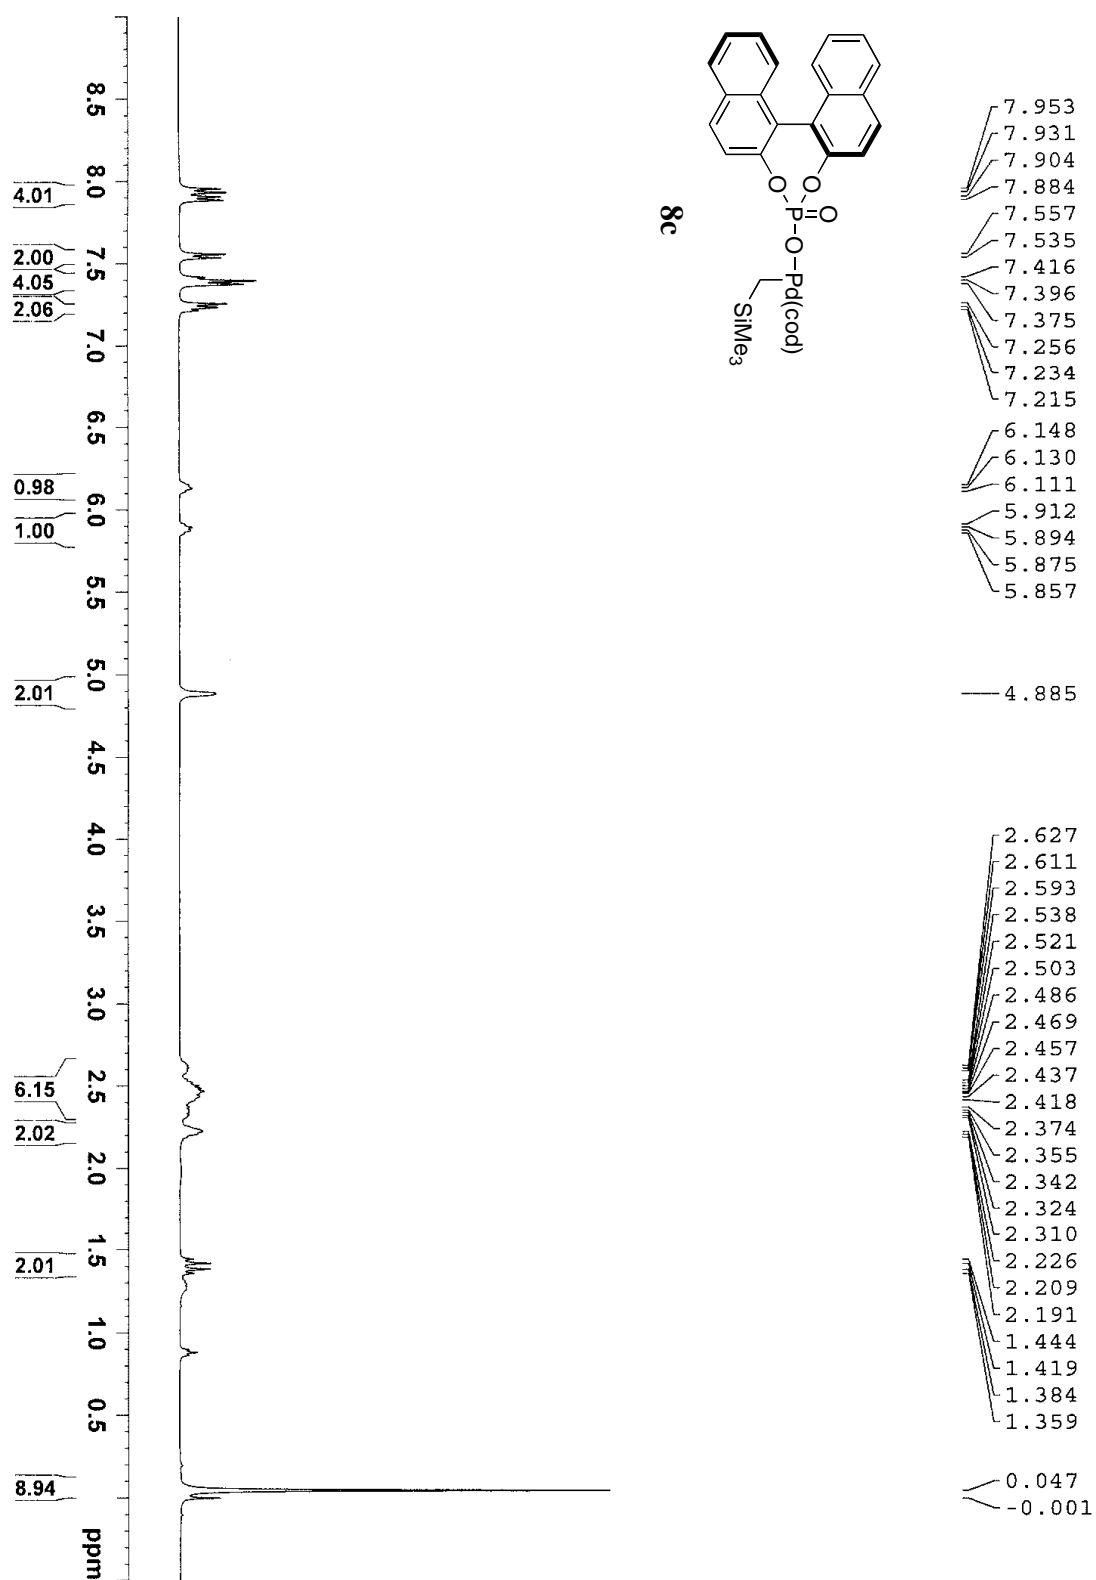

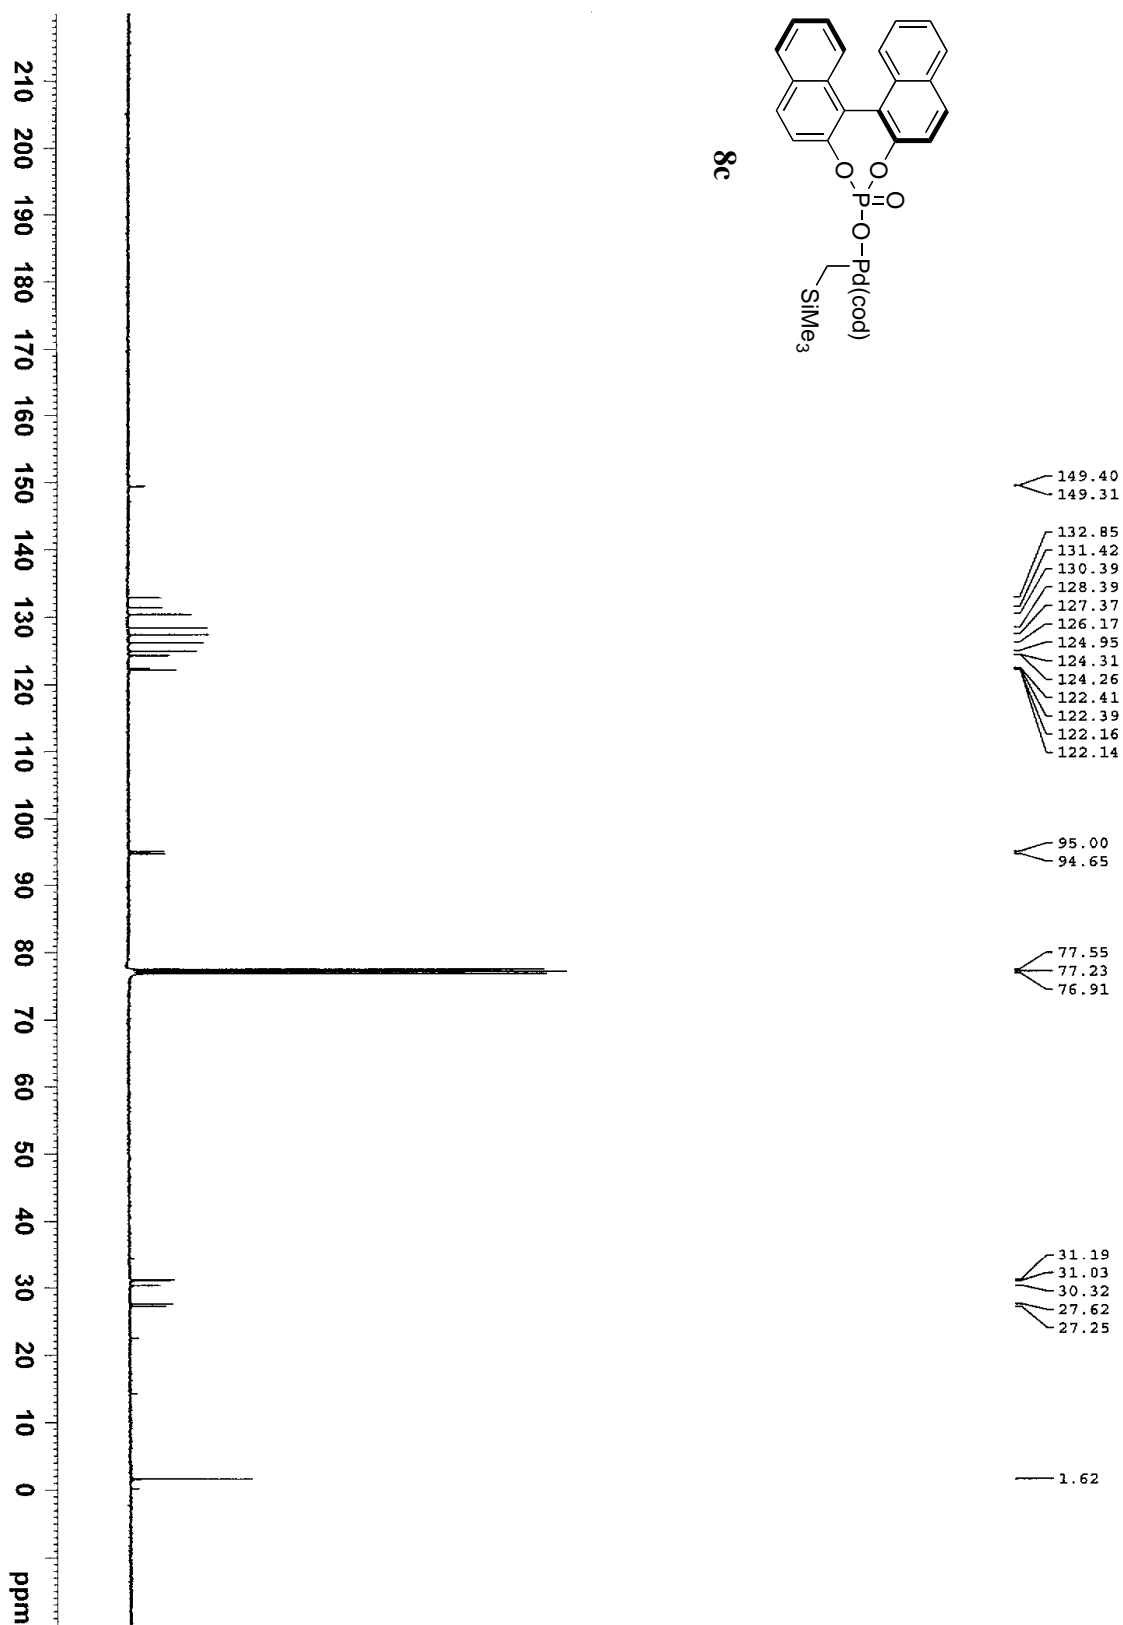

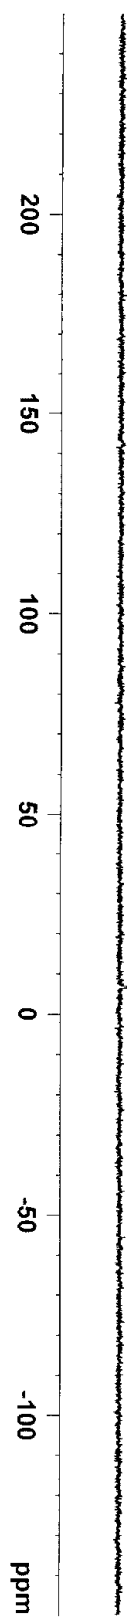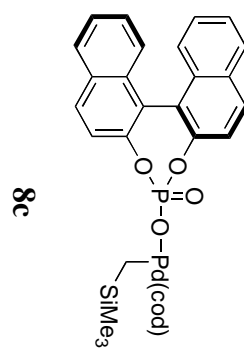

— 6.68

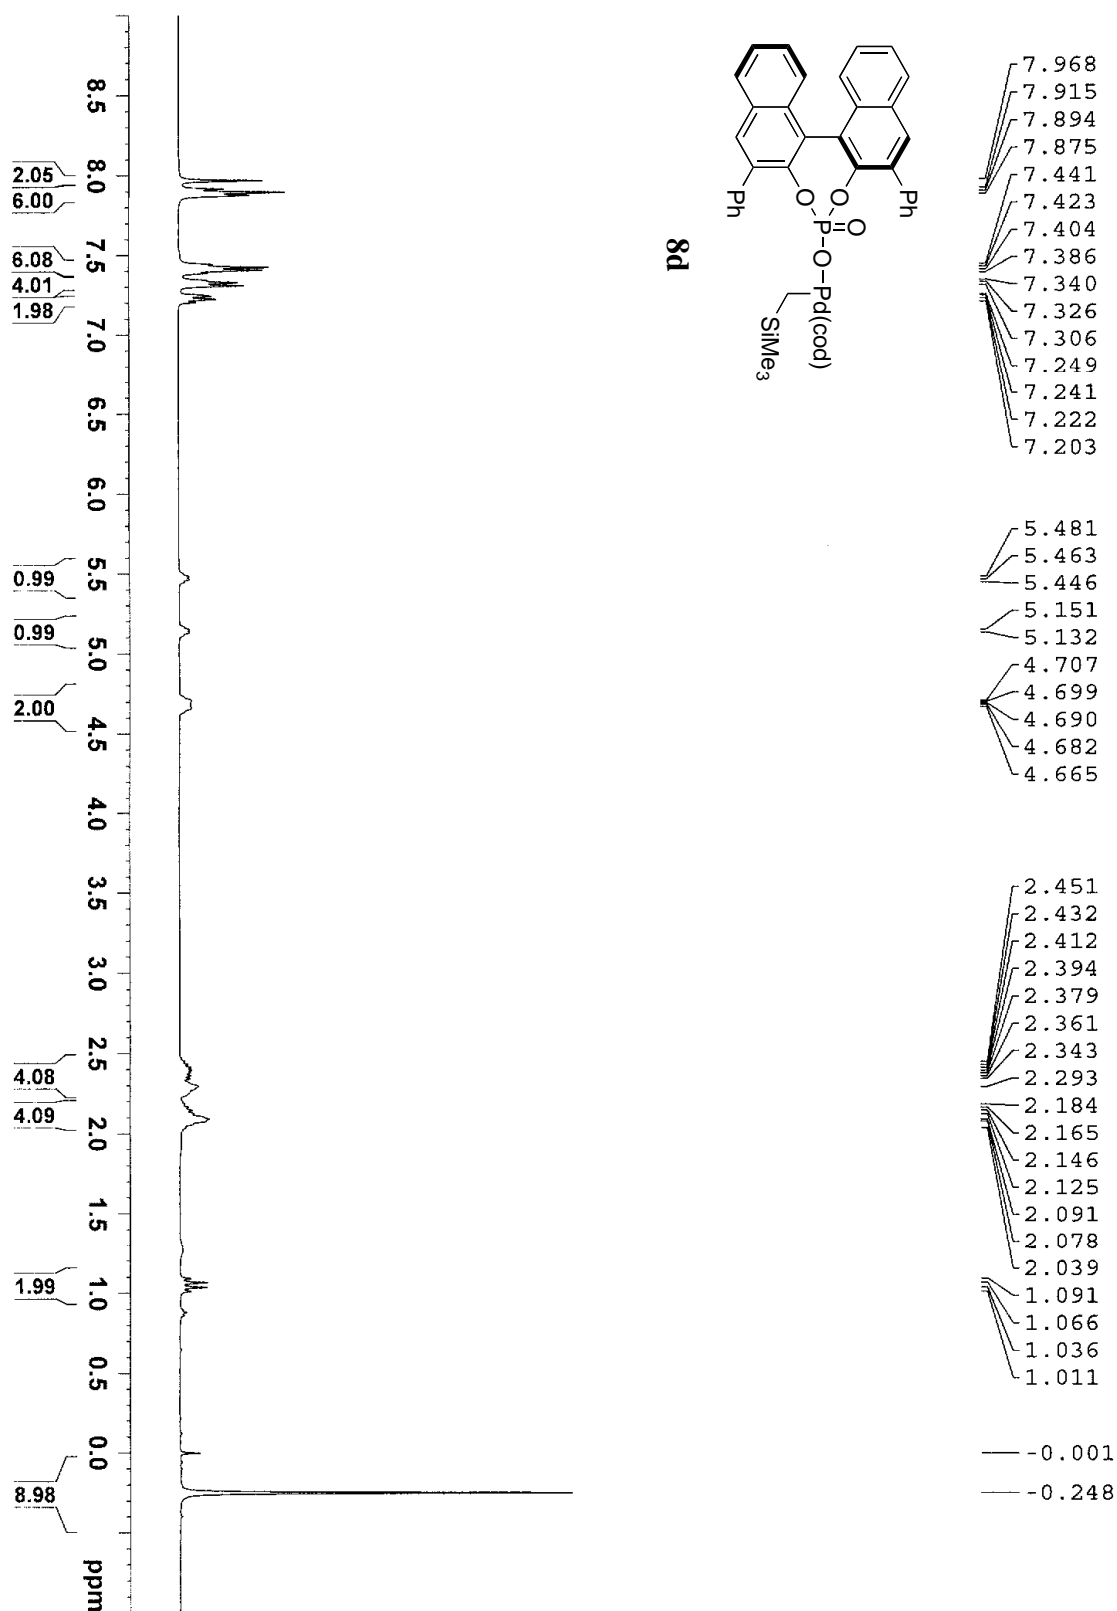



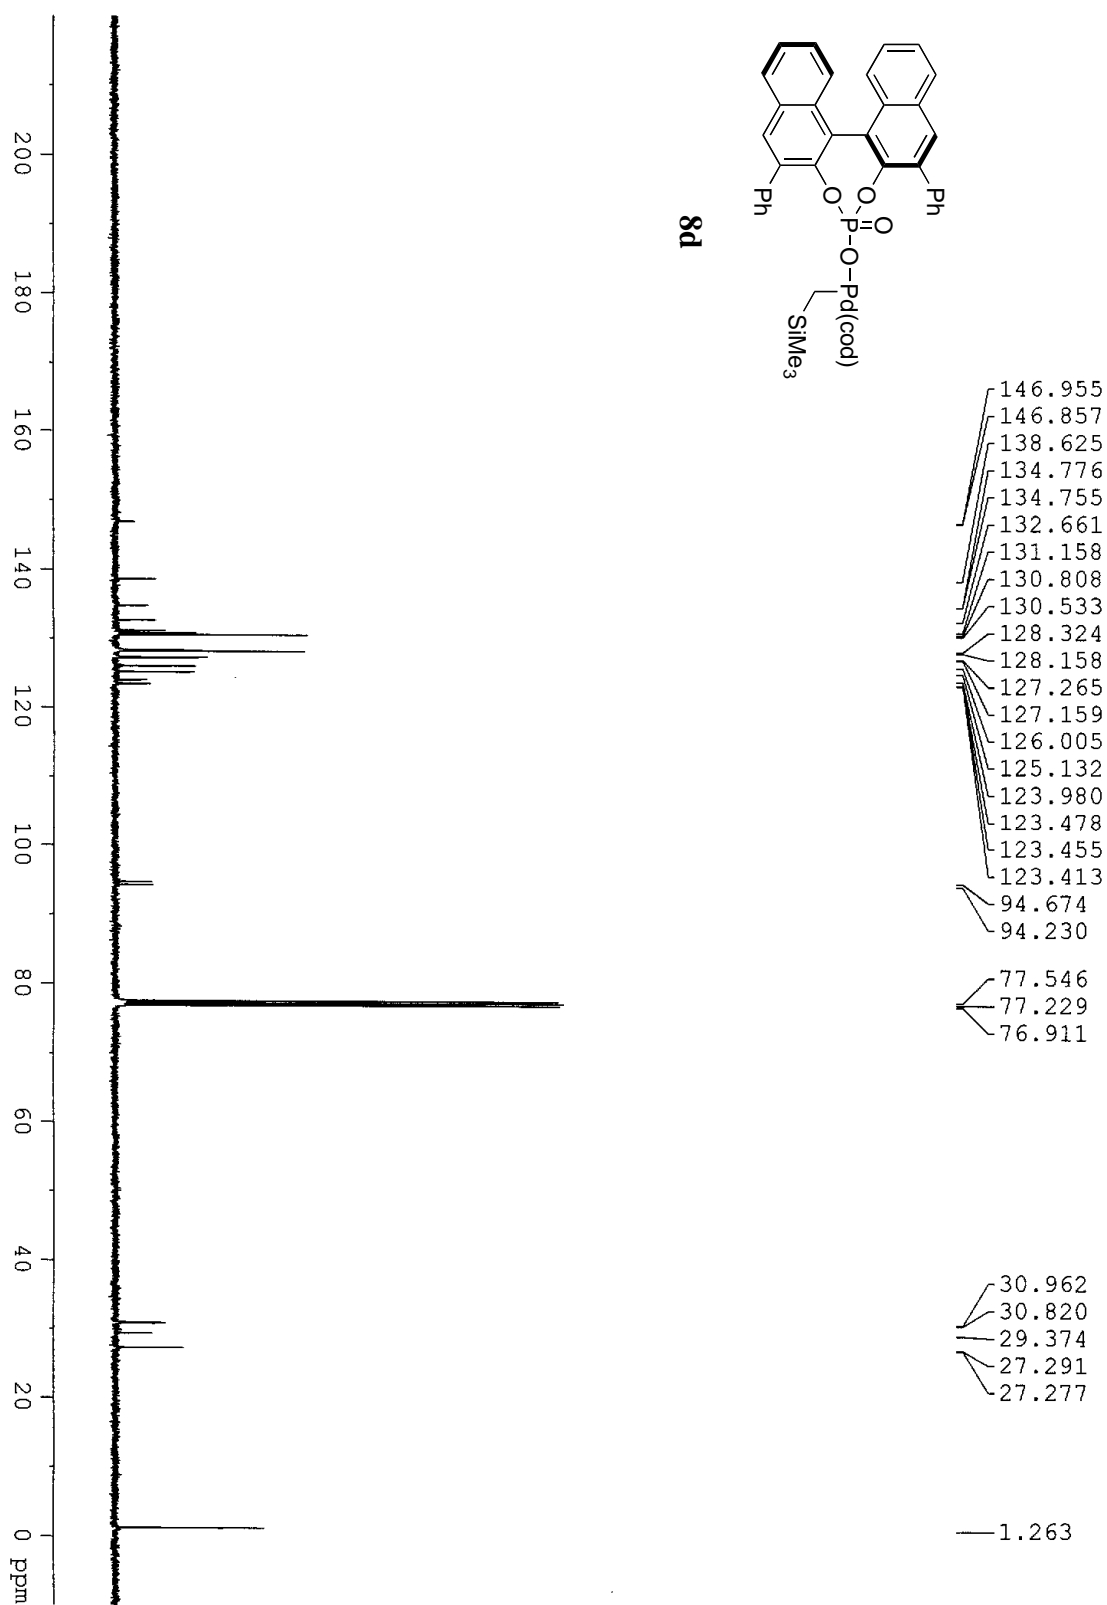

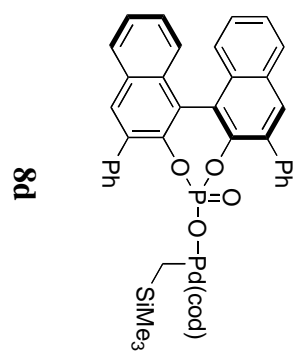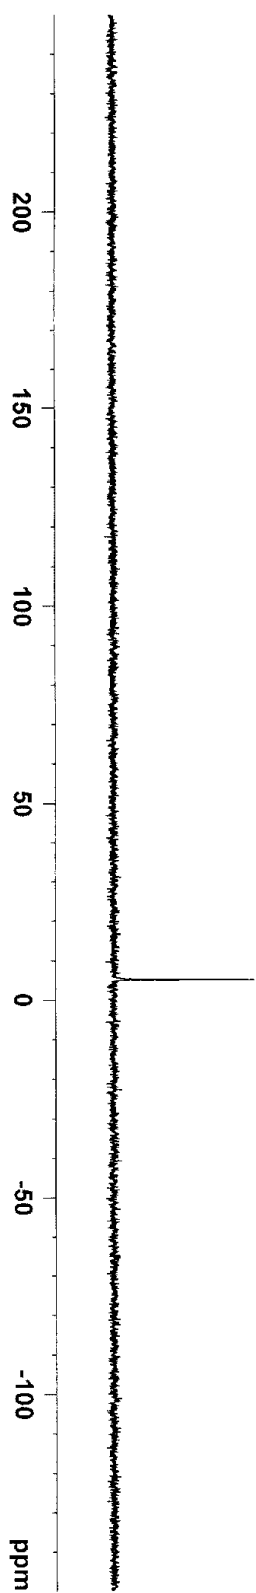

— 5.17
